# Supplementary material for: Systematic transcriptome analysis associated with physiological and chronological aging in Caenorhabditis elegans
Source: PubMed Central journal article supplement — Genome Res. 2022 Nov-Dec;32(11-12):2003–14. doi: 10.1101/gr.276515.121 (PMC9808617; doi:10.1101/gr.276515.121), 2022
Supplement: supp_gr.276515.121_Supplemental_Materials.pdf [file supp_gr.276515.121_Supplemental_Materials.pdf]

# 1 Supplemental Material

## Supplemental Fig. S1

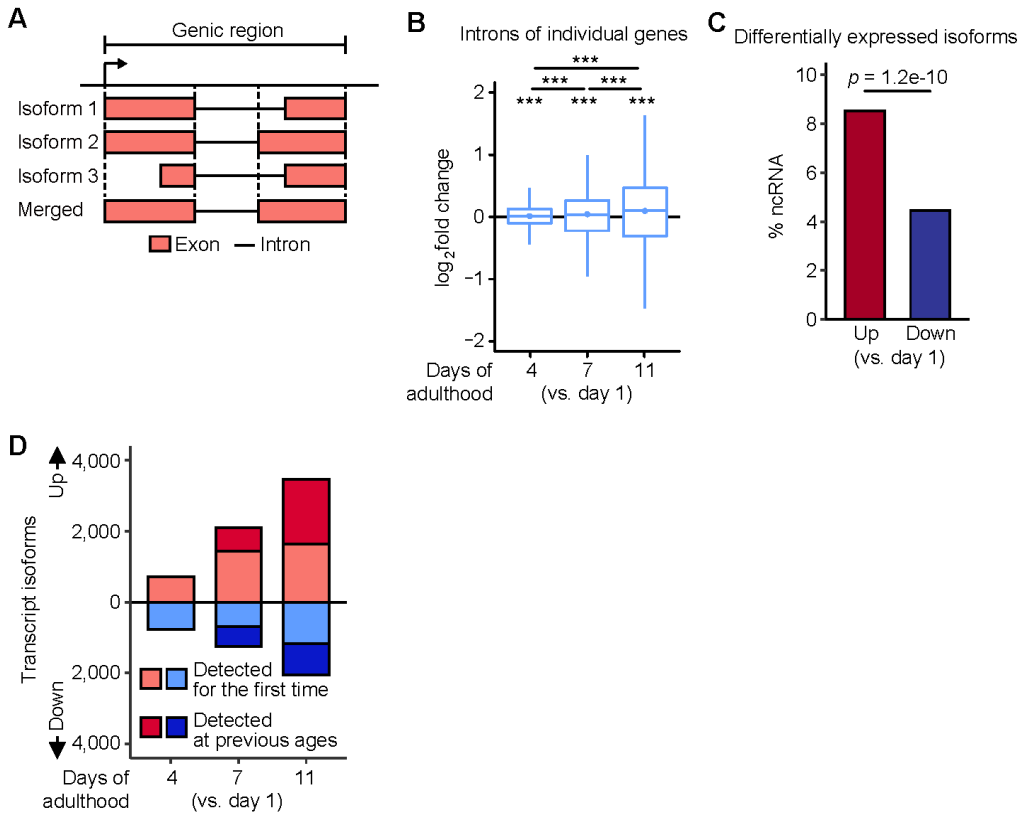

2

### 3 Supplemental Fig. S1. *Caenorhabditis elegans* transcriptome changes during

4 aging. (A) Categorization of exons and introns in a genic region with multiple

5 transcript isoforms. See Methods for detail. (B) Expression changes of intron regions

6 in individual non-overlapping genes in aged wild-type animals.  $p$  values are indicated

7 at the top, calculated by Wilcoxon signed rank test relative to day 1 of adulthood and

8 two-tailed Wilcoxon rank sum exact test for other comparisons ( $***p < 0.001$ ). (C)

9 The proportion of noncoding RNAs (ncRNAs) in all transcripts that were up-regulated

10 or down-regulated in aged animals.  $p$  value is shown at the top, calculated with two-

11 tailed Fisher's exact test. (D) The number of transcript isoforms that were up-

12 regulated and down-regulated in aged animals; 724, 2099, and 3467 transcripts

13 were up-regulated and 769, 1240, and 2045 transcripts were down-regulated in days  
14 4, 7, and 11 of adult animals compared to those in day 1 adult animals. We speculate  
15 that these numbers of transcripts are sufficient to influence the physiology of  
16 organisms. Transcripts were chosen if absolute fold change  $> 2$  and Benjamini and  
17 Hochberg-adjusted  $p < 0.05$  relative to day 1 of adulthood.

## Supplemental Fig. S2

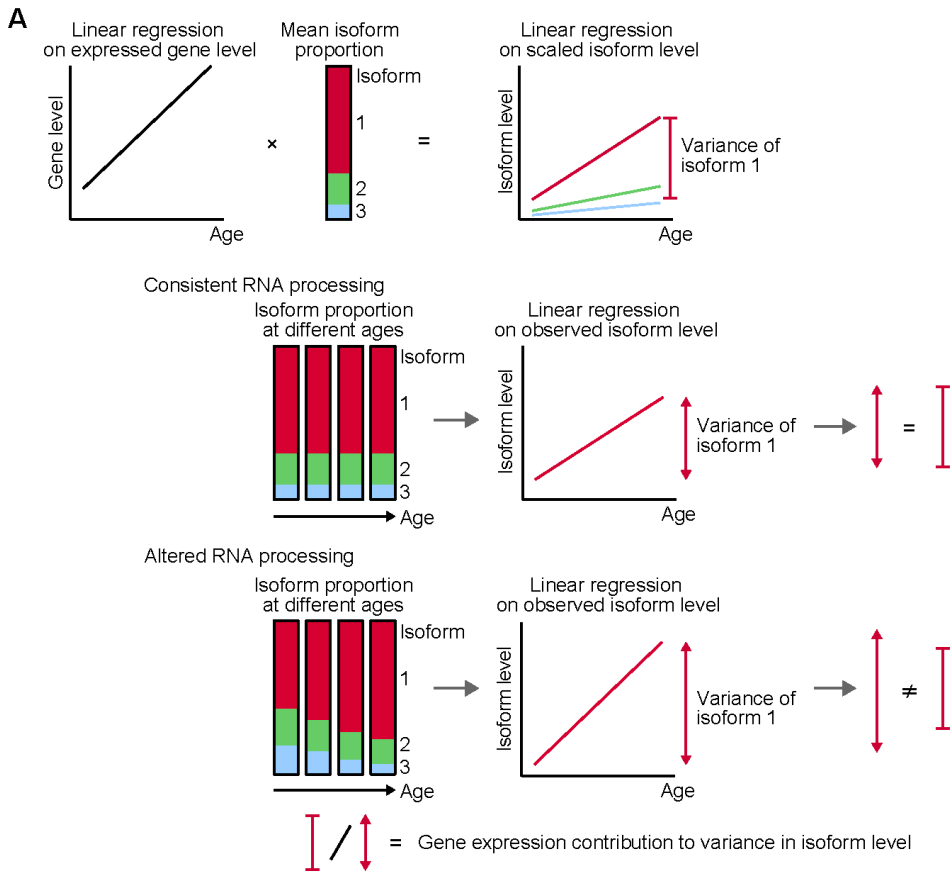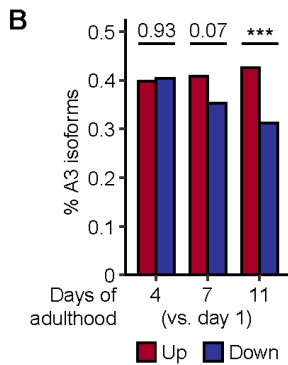

18

19 **Supplemental Fig. S2. Aging up-regulates transcript isoforms containing distal**

20 **alternative 3' splice sites. (A)** Schematic showing estimation of gene expression

21 contribution to variance in isoform levels by using linear regression. If a gene has

22 multiple isoforms, scaled isoform level is calculated by multiplying expressed gene

23 level and mean isoform proportion at different ages. In this example, the gene has

24 three isoforms arbitrarily, and the first isoform (isoform 1) is used for interpretation.  
25 From the calculation, variance of isoform 1 was estimated. If RNA-processing events  
26 occur consistently at different ages, the variance of observed levels of the isoform  
27 will be the same as that of scaled levels. In contrast, if RNA-processing events are  
28 altered at different ages, the result of observed isoform levels will be different from  
29 that of scaled isoform levels. The ratio of variance by scaled isoform levels to that by  
30 observed isoform levels can be interpreted as the contribution of gene expression to  
31 variance in isoform levels. (**B**) The proportion of A3 isoforms in all transcript isoforms  
32 with the age-dependent up-regulation and down-regulation.  $p$  values are indicated on  
33 top, calculated by two-tailed Fisher's exact test ( $***p < 0.001$ ).

### Supplemental Fig. S3

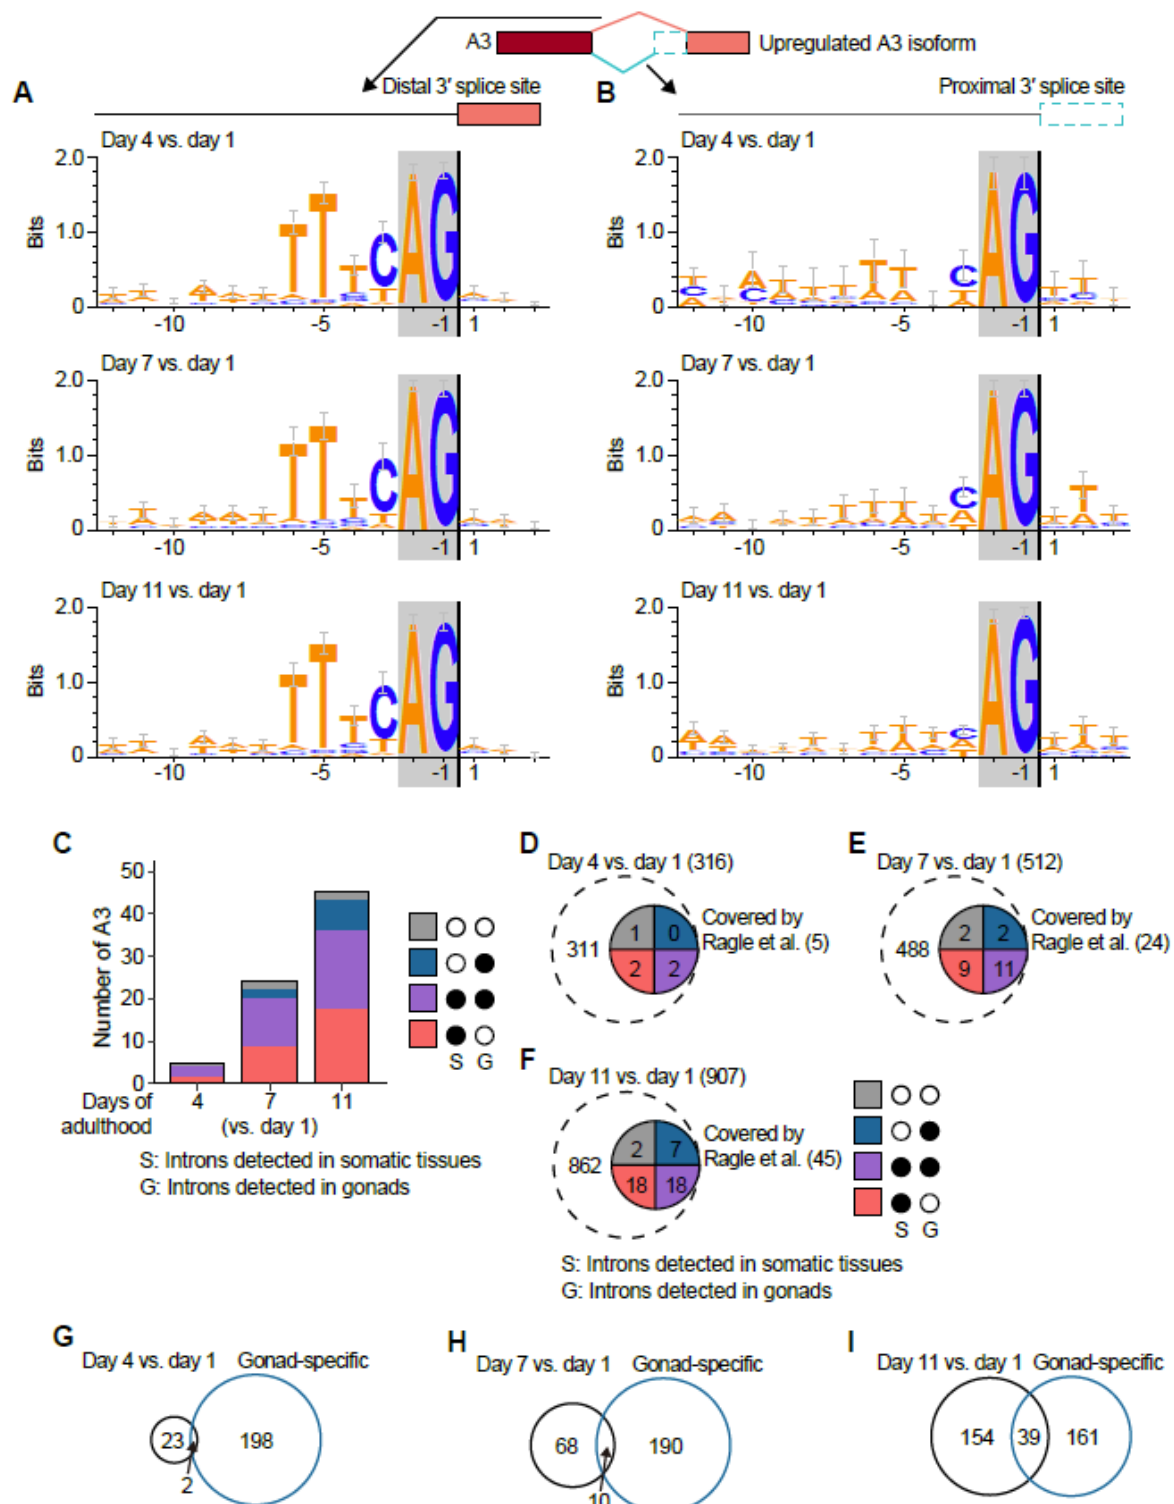

34

35 **Supplemental Fig. S3. Age-dependent up-regulation of A3 isoforms occurs in**

36 **somatic tissues as well as in gonads. (A, B) Sequences around distal (A) and**

37 proximal (**B**) 3' splice sites in age-dependently up-regulated A3 isoforms with  
38 annotated junctions based on the meta-analysis of RNA sequencing data (Tourasse  
39 et al. 2017). Gray shaded boxes represent nucleotide positions at -2 to -1 from 3'  
40 splice sites (+1). AG dinucleotides are the canonical 3' splicing consensus motif. See  
41 Supplemental Fig. S4 for additional sequence analyses of the 3' splice sites. (**C–F**)  
42 Comparisons between 5, 24 and 45 annotated introns with adjacent AG  
43 dinucleotides that are 6 nucleotides apart in A3 isoforms that were up-regulated  
44 respectively in day 4 (**D**), 7 (**E**), and 11 (**F**) adult animals and those detected in  
45 somatic tissues or gonads, obtained by reanalyzing a previous report (Ragle et al.  
46 2015). A filled circle indicates a category that includes introns detected in somatic  
47 tissues (S) or introns detected in gonads (G). In particular, we found that 18 (40%) of  
48 45 introns in A3 isoforms up-regulated in day 11 adult animals overlapped with those  
49 detected specifically in somatic tissues. (**G–I**) Comparisons between introns with  
50 adjacent AG dinucleotides that were within 18 nucleotides apart in A3 isoforms,  
51 which were up-regulated respectively in animals at day 4 (**G**), 7 (**H**), and 11 (**I**) of  
52 adulthood and those detected specifically in gonads, obtained by reanalyzing data  
53 in a previous report (Ragle et al. 2015).

## Supplemental Fig. S4

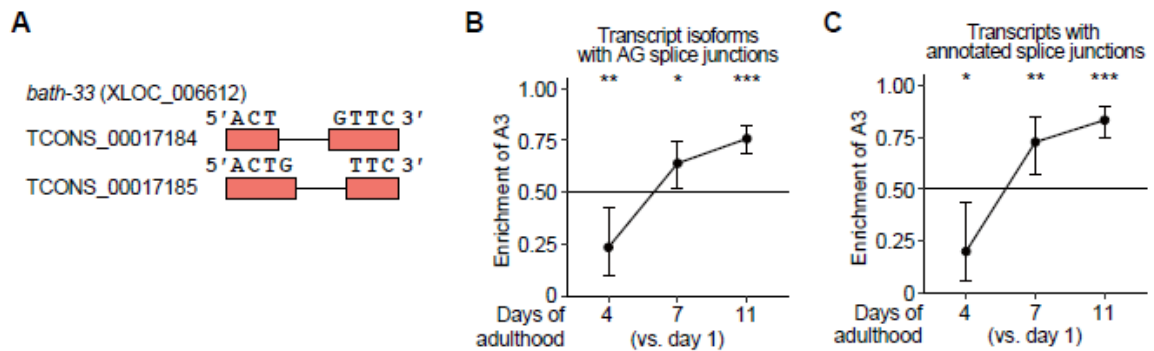

54

55 **Supplemental Fig. S4. A subset of age-dependently up-regulated A3 isoforms**  
56 **contains consensus AG dinucleotides at both proximal and distal 3' splice**  
57 **sites. (A)** As an example, we analyzed the 3' splice sites in *bath-33* transcripts,  
58 which raises the possibility that proximal and distal 3' splice sites that were 1  
59 nucleotide apart were alternative 5' splice sites (Suzuki et al. 2022); the adjacent 3'  
60 splice sites could be false positive cases of alternative 3' splice sites. Note that 5'-  
61 ACT/GTTC-3' was at the spliced exons of a transcript isoform (TCONS\_00017184)  
62 in *bath-33* (XLOC\_006612), and 5'-ACTG/TTC-3' was at the spliced exons of  
63 another isoform (TCONS\_00017185). **(B)** Analyses of 26, 83, and 205 junctions,  
64 which contained alternative 3' splice sites within 18 nucleotides and AG dinucleotides  
65 at proximal and distal 3' sites, of A3 isoforms that were up-regulated respectively in  
66 day 4, 7, and 11 of adult animals. The A3 usage was age-dependently increased in  
67 the A3 isoforms. **(C)** Analyses of A3 transcript isoforms annotated in meta-analysis of  
68 RNA-seq data (Tourasse et al. 2017). The annotated A3 isoforms covered 8.3%,  
69 12.3%, and 13.9% of proximal 3' splice sites and 32.9%, 37.6%, and 34.0% of distal  
70 3' splice sites in A3 isoforms up-regulated at day 4, 7, and 11 of adulthoods  
71 compared with those at day 1 adulthood. The A3 usage was age-dependently  
72 increased in the annotated A3 isoforms. These data indicate that adjacent 3' splice

73 sites separated by 1 nucleotide apart did not change our conclusion regarding age-  
74 dependent changes in A3 isoforms.



## Supplemental Fig. S5

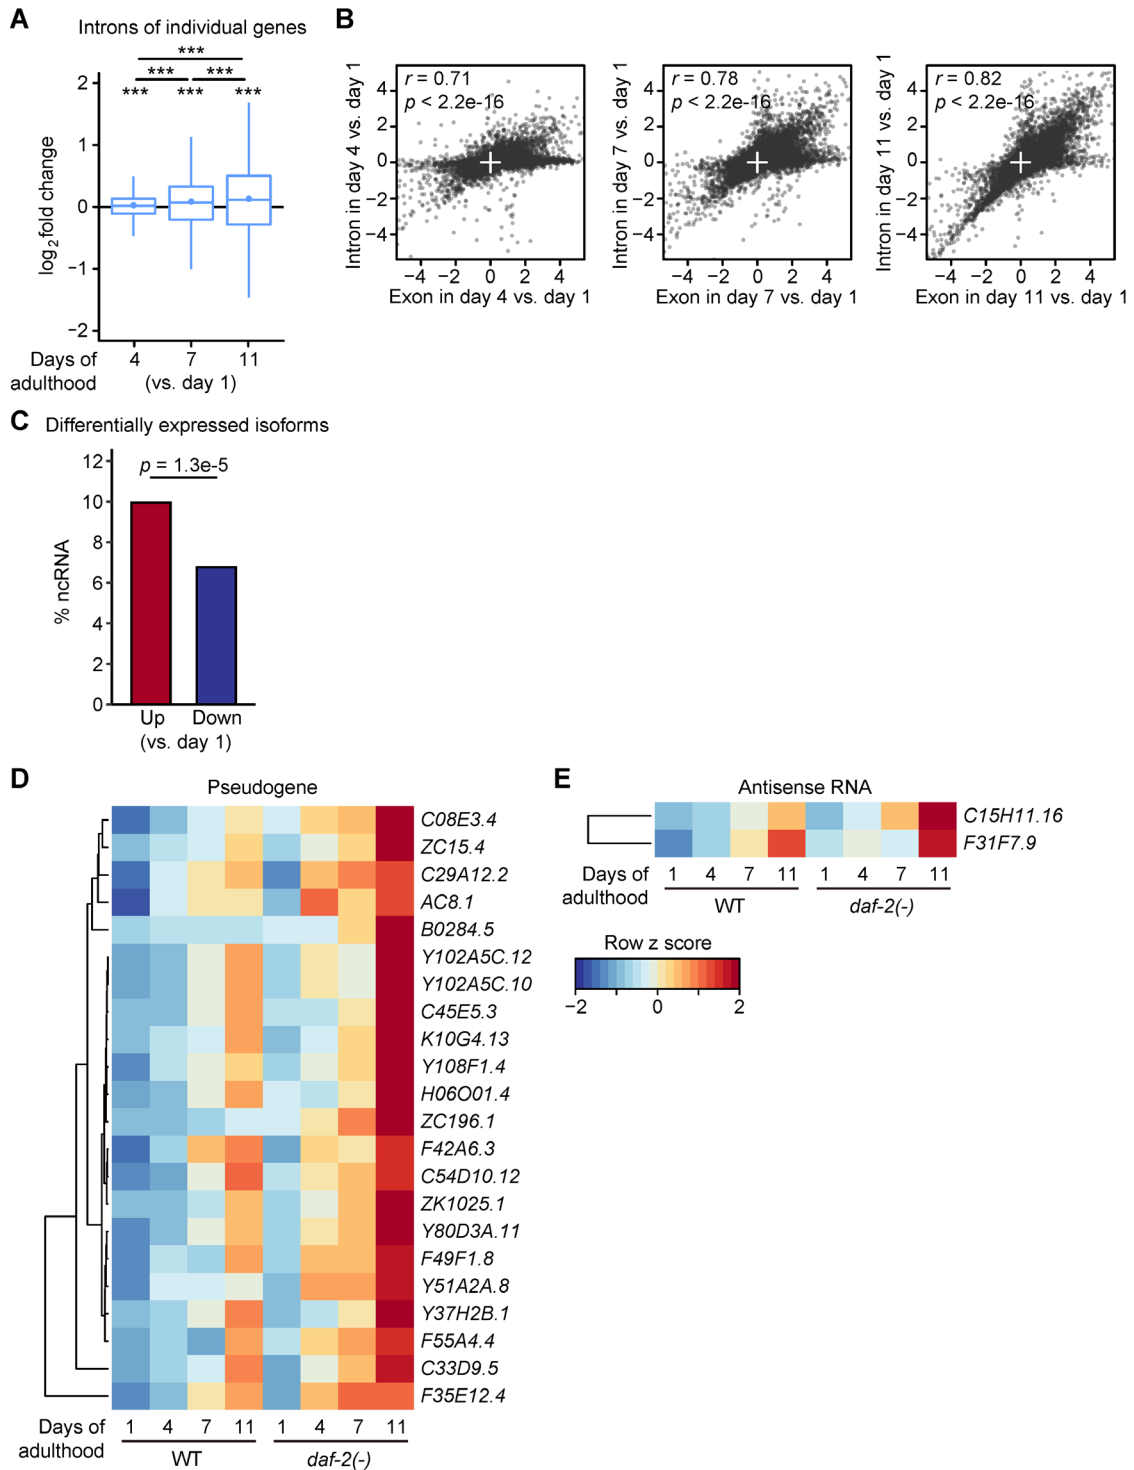

75

76 **Supplemental Fig. S5. Reduced transcriptional fidelity is pervasive during**

77 **aging in *daf-2* mutant animals. (A)** Expression changes of intron regions in

78 individual non-overlapping genes in aged *daf-2(e1370)* [*daf-2(-)*] animals. *p* values  
79 are indicated on top, calculated by Wilcoxon signed rank test relative to day 1 of  
80 adulthood and two-tailed Wilcoxon rank sum exact test for other comparisons ( $***p <$   
81  $0.001$ ). **(B)** Comparisons between age-dependent expression changes in exon and  
82 intron regions in individual non-overlapping genes in *daf-2(-)* animals. Pearson  
83 correlation coefficient *r* and *p* value are shown. **(C)** The proportion of noncoding  
84 RNAs (ncRNAs) in all transcripts that were up-regulated or down-regulated in aged  
85 *daf-2(-)* animals. Transcripts were chosen if absolute fold change  $> 2$  and Benjamini  
86 and Hochberg-adjusted  $p < 0.05$  relative to day 1 of adulthood. *p* values are shown  
87 at the top, calculated by two-tailed Fisher's exact test. **(D, E)** Relative expression  
88 levels of 22 pseudogene-coded RNAs (pseudogene) **(D)** and two antisense RNAs  
89 **(E)** matching the temporal shift at an individual transcript level in different ages of  
90 wild-type (WT) and *daf-2(-)* animals. Genes were chosen if fold change  $> 1$  and  $p <$   
91  $0.05$  relative to day 1 of adulthood in WT animals, fold change  $> 2$  and  $p < 0.05$   
92 relative to day 1 of adulthood for *daf-2(-)* animals, and fold change in *daf-2(-)* animals  
93  $>$  that in WT animals at days 1 and 11 of adulthood. Differentially expressed snoRNA  
94 was not identified because of their variable levels.

## Supplemental Fig. S6

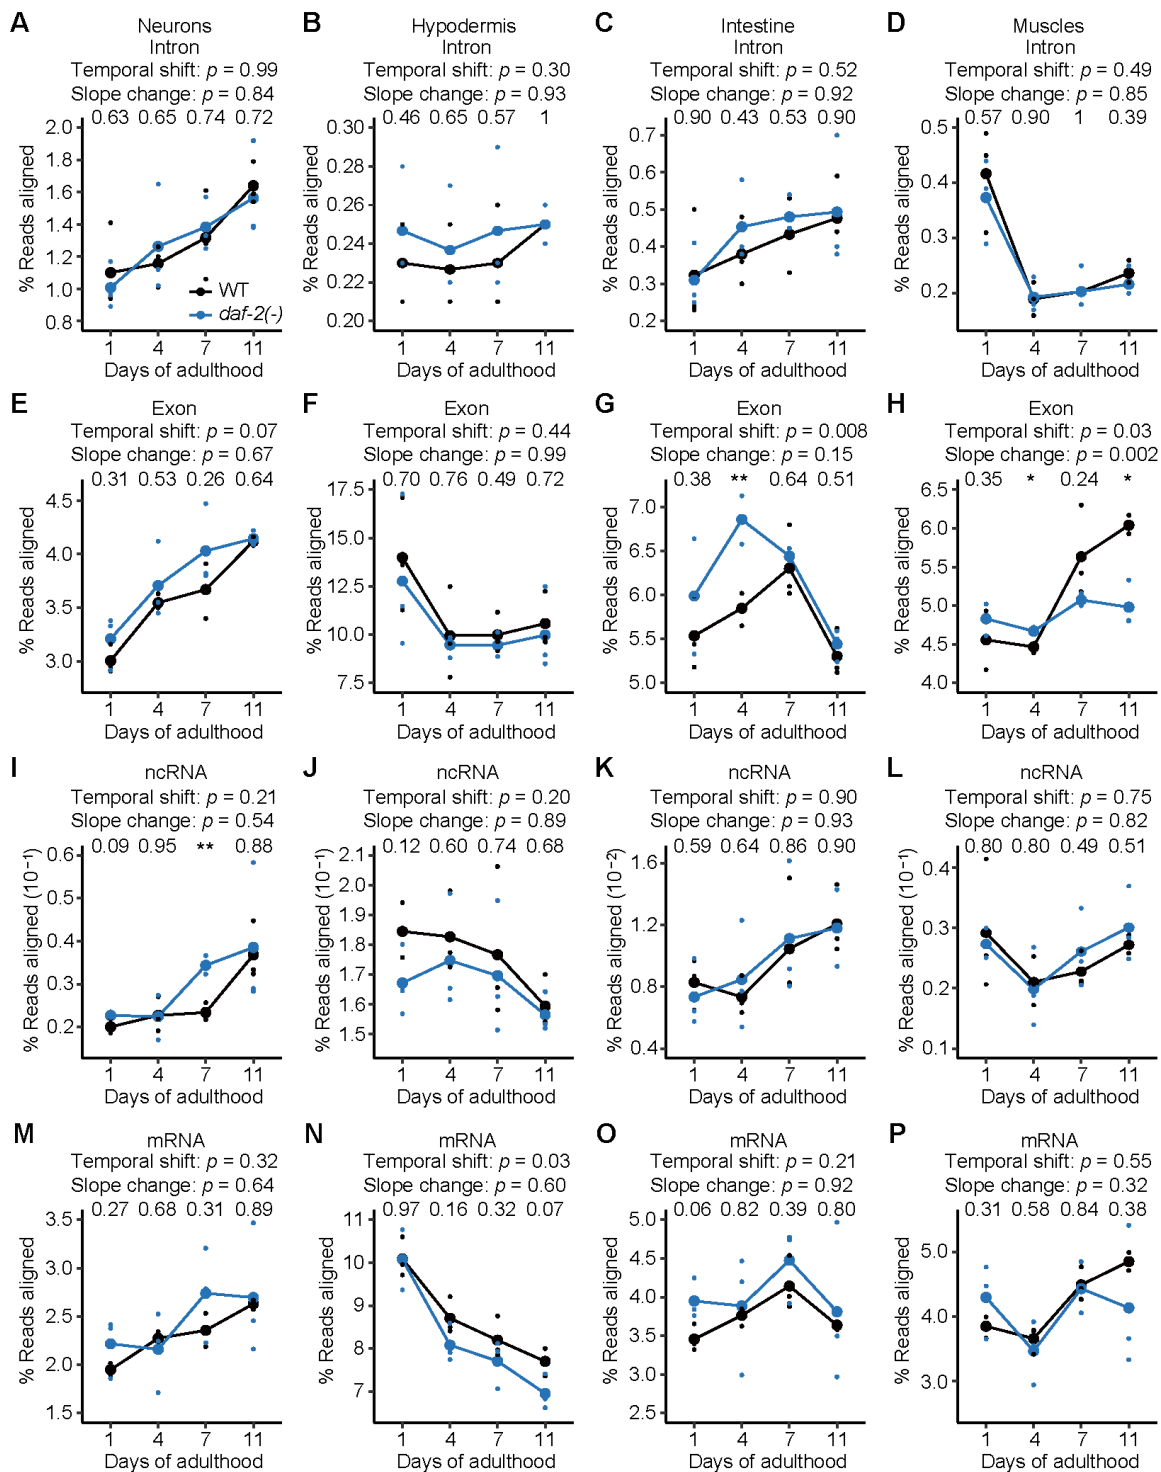

95

96 **Supplemental Fig. S6. Age-dependent expression changes in most structural**  
 97 **and functional transcripts match chronological aging in neurons and the**

98 **intestine. (A–H)** Overall expression levels of structural elements, including intron  
99 **(A–D)**, and exon regions **(E–H)**, enriched in neurons **(A, E)**, the hypodermis **(B, F)**,  
100 the intestine **(C, G)**, and the muscles **(D, H)**, in wild-type (WT) and *daf-2(e1370)* [*daf-*  
101 *2(-)*] animals at indicated ages. **(I–P)** Overall levels of functional RNA elements,  
102 including noncoding RNA (ncRNA) **(I–L)** and protein-coding messenger RNA  
103 (mRNA) **(M–P)**, enriched in neurons **(I, M)**, the hypodermis **(J, N)**, the intestine **(K,**  
104 **O)**, and the muscles **(L, P)**, in WT and *daf-2(-)* animals at indicated ages. The levels  
105 of transcripts enriched in a specific tissue were significantly higher than the average  
106 levels across all the other tissues (fold change > 2 and adjusted *p* value < 0.05)  
107 (Kaletsky et al. 2018). *p* value is shown at each day, calculated by two-tailed Welch’s  
108 *t*-test between WT and *daf-2(-)* animals of the same chronological age. In each  
109 panel, two *p* values are shown for the effects of genotypes on transcript levels that  
110 correspond to “Temporal shift”, and those for interaction between genotypes and  
111 ages that correspond to “Slope change”, calculated by using two-way analysis of  
112 variance (ANOVA).

## Supplemental Fig. S7

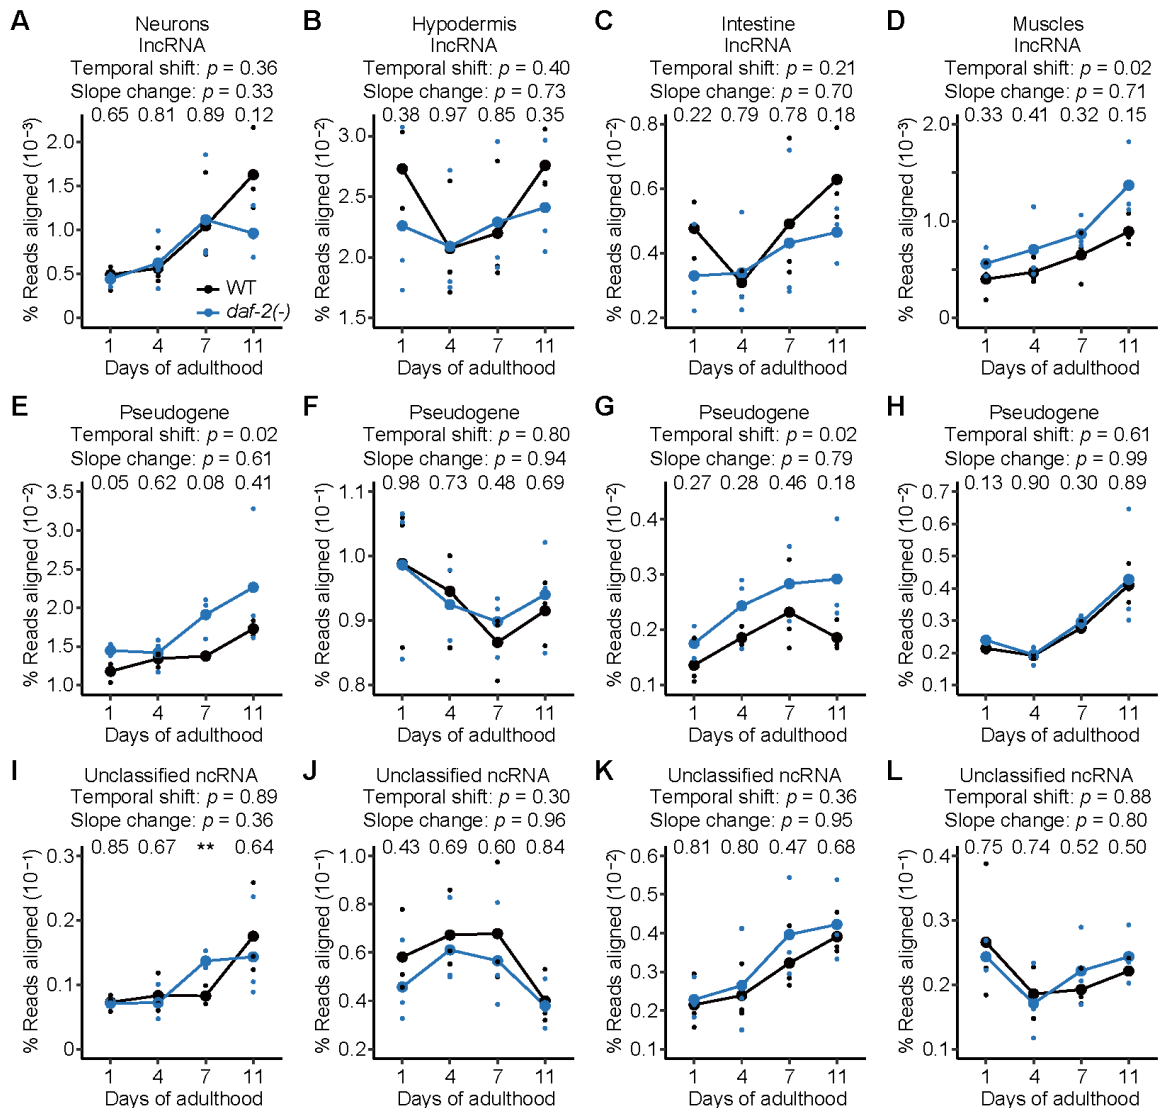

113

114 **Supplemental Fig. S7. Age-dependent expression changes in most**  
 115 **subcategories of ncRNAs match chronological aging in neurons and the**  
 116 **intestine.** Age-dependent level changes in noncoding RNA (ncRNA), including long  
 117 ncRNA (lncRNA) (**A–D**), pseudogene-coded RNA (pseudogene) (**E–H**), and  
 118 unclassified ncRNA (**I–L**), enriched in neurons (**A, E, I**), the hypodermis (**B, F, J**), the  
 119 intestine (**C, G, K**), and the muscles (**D, H, L**), in wild-type (WT) and *daf-2(e1370)*  
 120 [*daf-2(-)*] animals at indicated ages. snoRNAs, snRNAs, or antisense RNAs were not

121 analyzed because of insufficient read depth. The levels of transcripts enriched in a  
122 specific tissue were significantly higher than the average levels across all the other  
123 tissues (fold change > 2 and adjusted  $p$  value < 0.05) (Kaletsky et al. 2018).  $p$  value  
124 is shown at each day, calculated by two-tailed Welch's  $t$ -test between WT and *daf*-  
125 2(-) animals of the same chronological age (\*\* $p$  < 0.01). In each panel, two  $p$  values  
126 are shown for the effects of genotypes on transcript levels that correspond to  
127 "Temporal shift", and those for interaction between genotypes and ages that  
128 correspond to "Slope change", calculated by using two-way analysis of variance  
129 (ANOVA).

## Supplemental Fig. S8

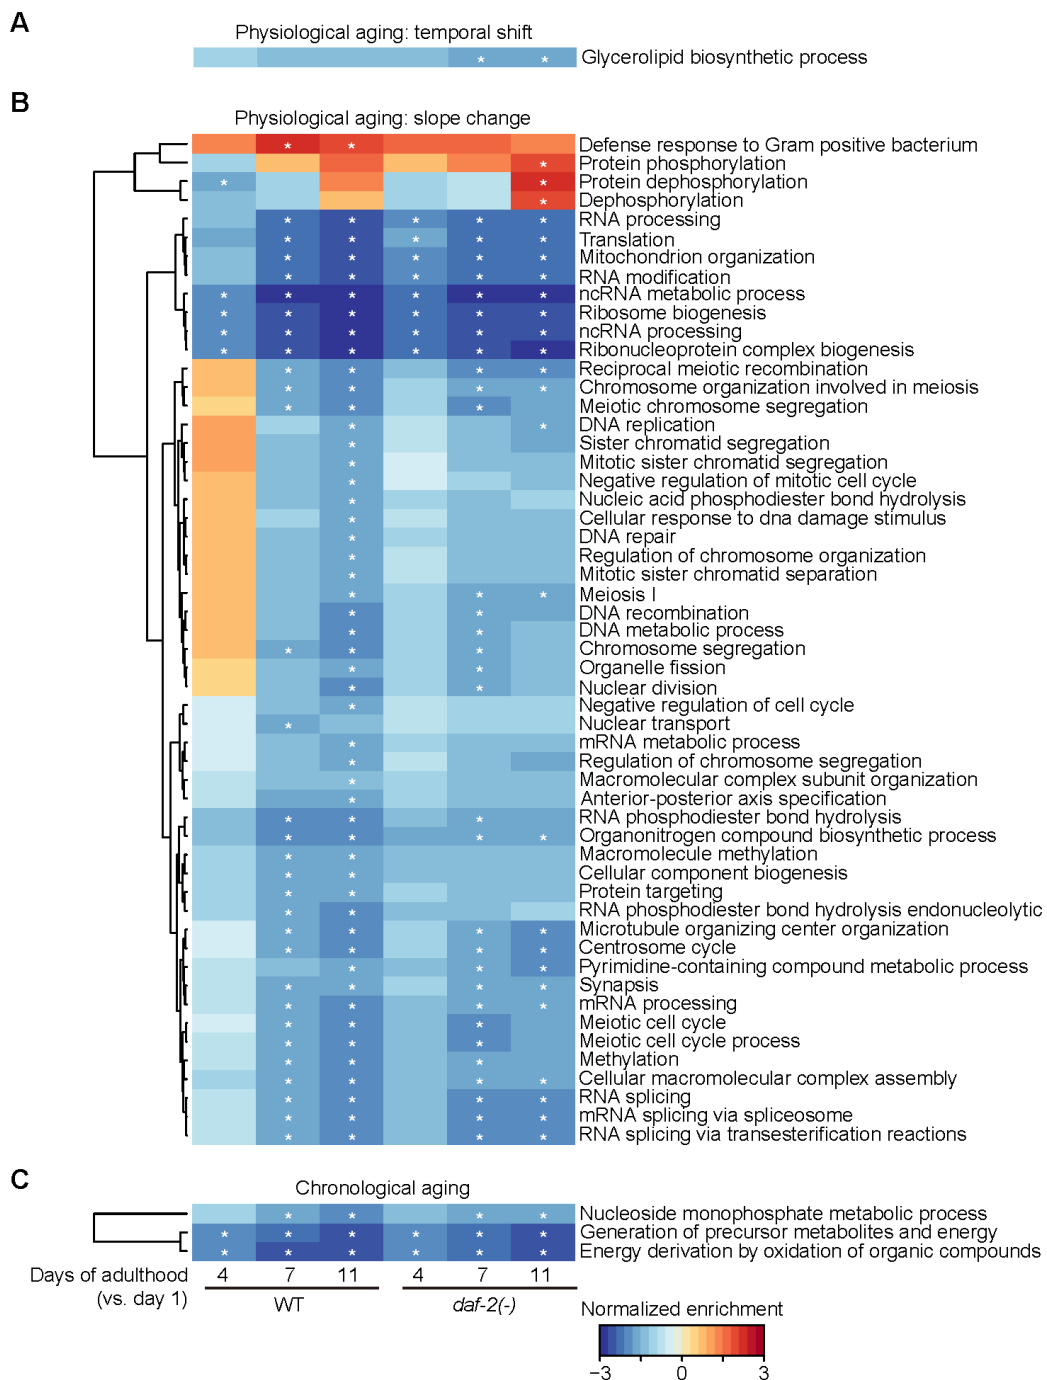

130

131 **Supplemental Fig. S8. Biological processes associated with physiological**

132 **aging and chronological aging. (A–C) Normalized enrichment of expression**

133 **changes of genes related to particular biological processes in wild-type (WT) and**

134 ***daf-2* mutant [*daf-2(-)*] animals during aging. The changes of the processes were**

135 associated with physiological aging, which include temporal shift (**A**) and slope  
136 change (**B**), and chronological aging (**C**). Adjusted  $p$  value is shown in each cell,  
137 calculated by gene set enrichment analysis test and adjusted using false discovery  
138 rates (\*adjusted  $p < 0.1$ ).



## Supplemental Fig. S9

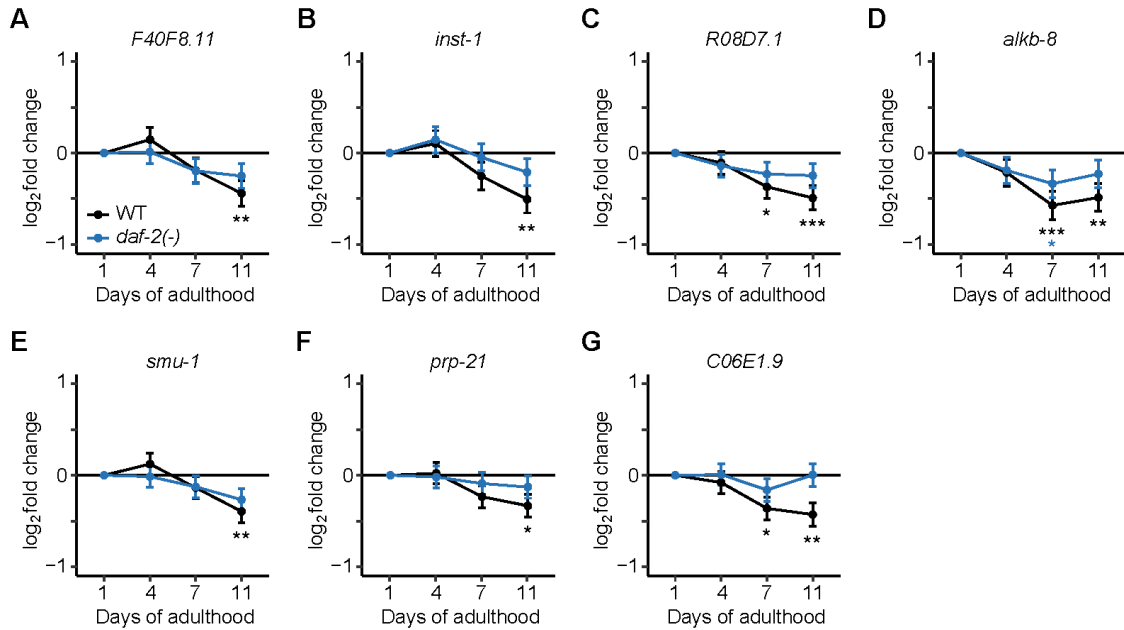

139

140 **Supplemental Fig. S9. *daf-2* mutations slow age-dependent down-regulation of**  
 141 **various genes encoding RNA-processing components. (A–G) Expression**  
 142 changes of the RNA-processing component-encoding genes, *F40F8.11* (A), *inst-1*  
 143 (B), *R08D7.1* (C), *alkb-8* (D), *smu-1* (E), *prp-21* (F), and *C06E1.9* (G), during aging  
 144 in wild-type (WT) and *daf-2(e1370)* [*daf-2(-)*] animals. Adjusted *p* values are shown,  
 145 calculated by using DESeq2's Wald test relative to day 1 adult and adjusted by using  
 146 the procedure of Benjamini and Hochberg (\*adjusted *p* < 0.05, \*\*adjusted *p* < 0.01,  
 147 \*\*\*adjusted *p* < 0.001).

## Supplemental Fig. S10

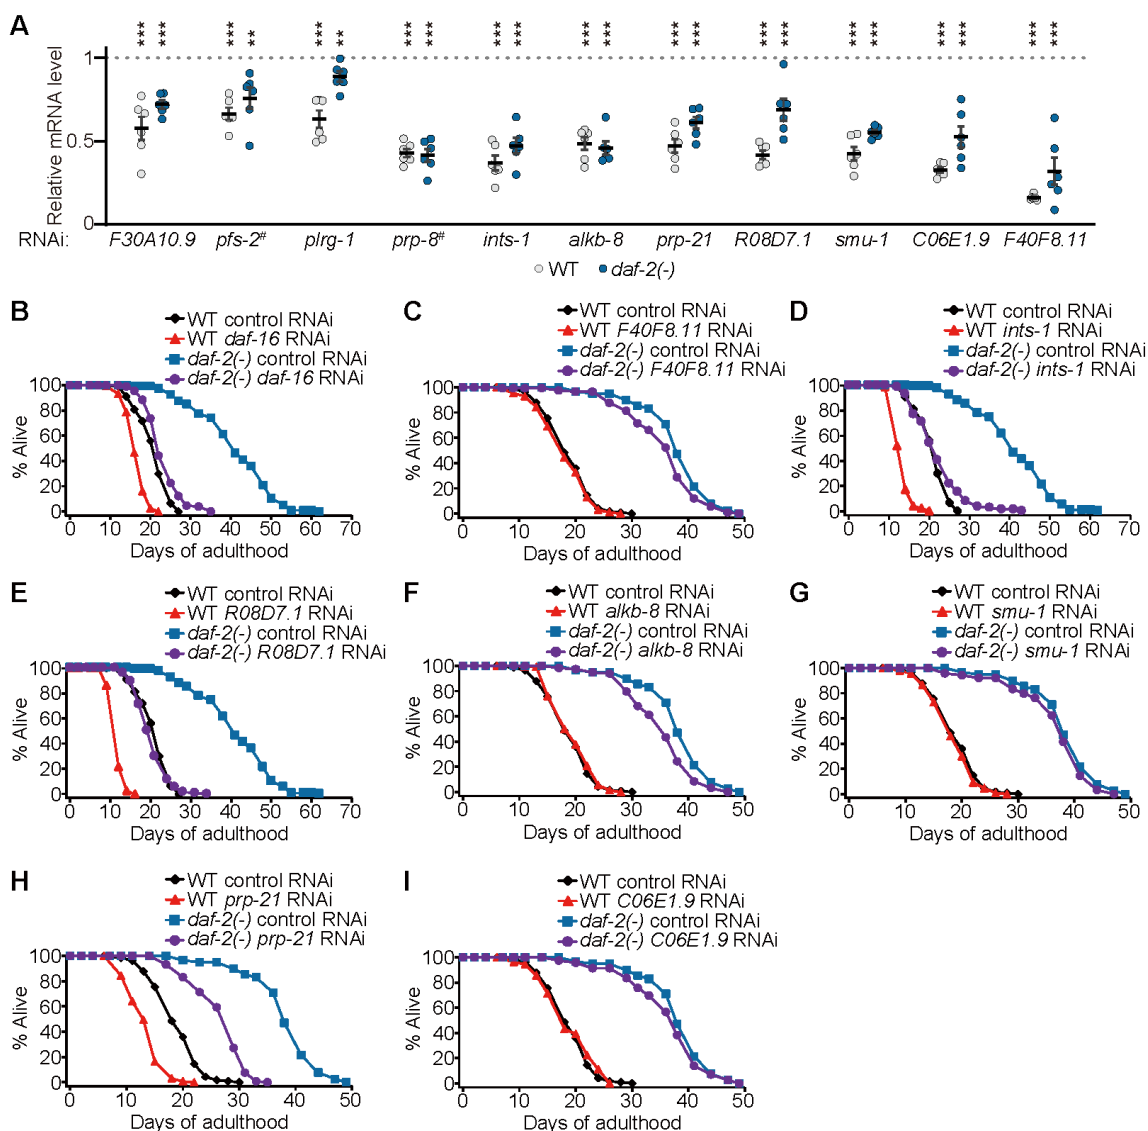

148

149 **Supplemental Fig. S10. The effects of RNAi targeting each of the tested genes**  
 150 **encoding RNA-processing components. (A)** RNAi efficiency for indicated target  
 151 genes in wild-type (WT) and *daf-2(e1370)* [*daf-2(-)*] animals measured by using qRT-  
 152 PCR (n = 6 for each condition). Error bars represent standard error of the mean  
 153 (SEM). *p* values are shown at the top, calculated by two-tailed Student's *t*-test  
 154 relative to control RNAi (\*\**p* < 0.01, \*\*\**p* < 0.001). Whole-life RNAi treatment was  
 155 used except those noted with sharp (#) signs, which were performed using adult-only

156 RNAi treatment. (**B–I**) Lifespan curves of WT and *daf-2(-)* animals treated with  
157 control RNAi and RNAi against *daf-16* (a positive control) (**B**), *F40F8.11* (**C**), *ints-1*  
158 (**D**), *R08D7.1* (**E**), *alkb-8* (**F**), *smu-1* (**G**), *prp-21* (**H**), or *C06E1.9* (**I**) ( $N \geq 90$  for each  
159 condition). See Source files for additional repeats and statistical analysis for the  
160 lifespan data shown in this figure.

## Supplemental Fig. S11

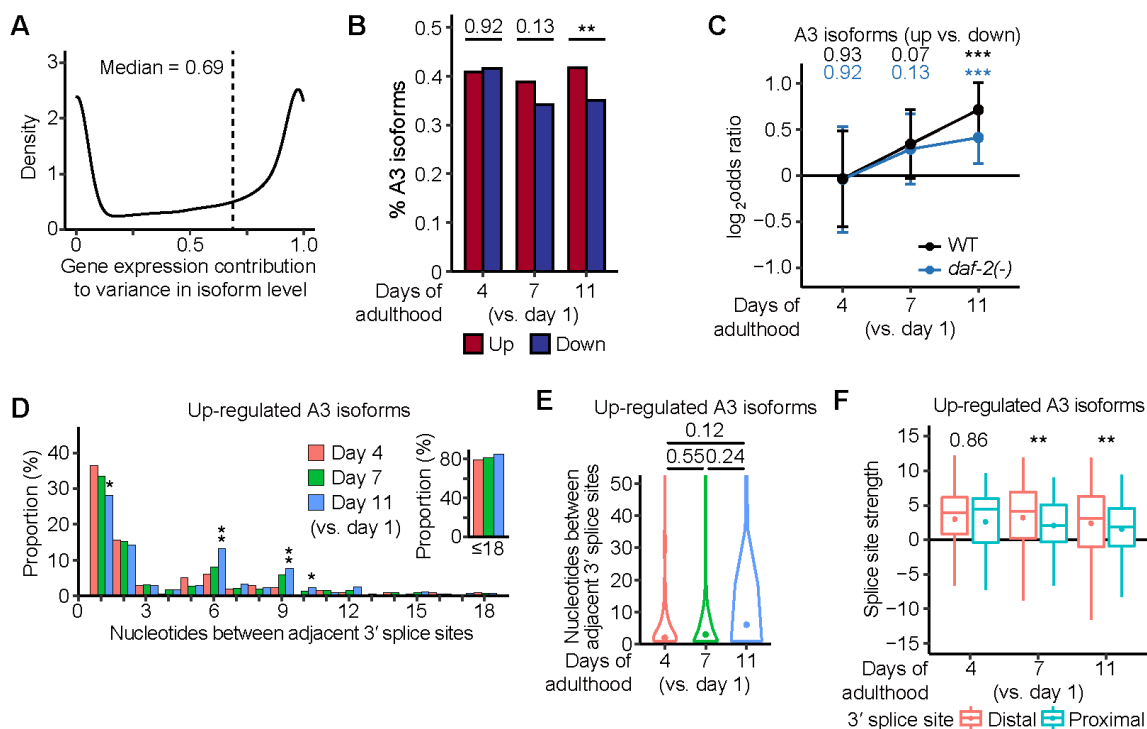

161

162 **Supplemental Fig. S11. *daf-2* mutations delay age-dependent changes in the**  
 163 **proportion of A3 in transcript isoforms. (A)** Gene expression contribution to  
 164 variance in isoform levels in *daf-2(e1370)* [*daf-2(-)*] animals. See Fig. S2A for a  
 165 schematic overview. **(B)** The proportions of A3 isoforms in all transcript isoforms with  
 166 age-dependent up-regulation and down-regulation in *daf-2* mutants.  $p$  values are  
 167 indicated at the top, calculated by two-tailed Fisher's exact test (\*\* $p < 0.001$ ). **(C)**  
 168 Odds ratio between A3 isoforms displaying age-dependent up-regulation and those  
 169 exhibiting down-regulation. Adjusted  $p$  values are shown at the top, calculated by  
 170 two-tailed Fisher's exact test (\*\* $p < 0.001$ ). **(D)** Nucleotides between  
 171 adjacently located proximal and distal 3' splice sites in age-dependently up-regulated  
 172 A3 isoforms in *daf-2(-)* animals. Inset: proportion of the cases with adjacent 3' splice  
 173 sites located within 18 nucleotides.  $p$  values are shown at the top, calculated by two-  
 174 tailed Fisher's exact test (\* $p < 0.05$ , \*\* $p < 0.01$ , \*\*\* $p < 0.001$ ). **(E)** Distribution of

175 nucleotides between adjacent 3' splice sites in age-dependently up-regulated A3  
176 isoforms in *daf-2(-)* animals. *p* values are shown at the top, calculated using two-  
177 tailed Wilcoxon rank sum exact test. (**F**) Splice site strength of proximal and distal 3'  
178 splice sites in age-dependently up-regulated A3 isoforms in *daf-2(-)* animals. The A3  
179 isoforms were annotated by the meta-analysis of RNA-seq data (Tourasse et al.  
180 2017). The strength was calculated based on a maximum entropy model. *p* values  
181 are indicated on top, calculated by using two-tailed Wilcoxon rank sum exact test  
182 (\*\**p* < 0.01).

## Supplemental Fig. S12

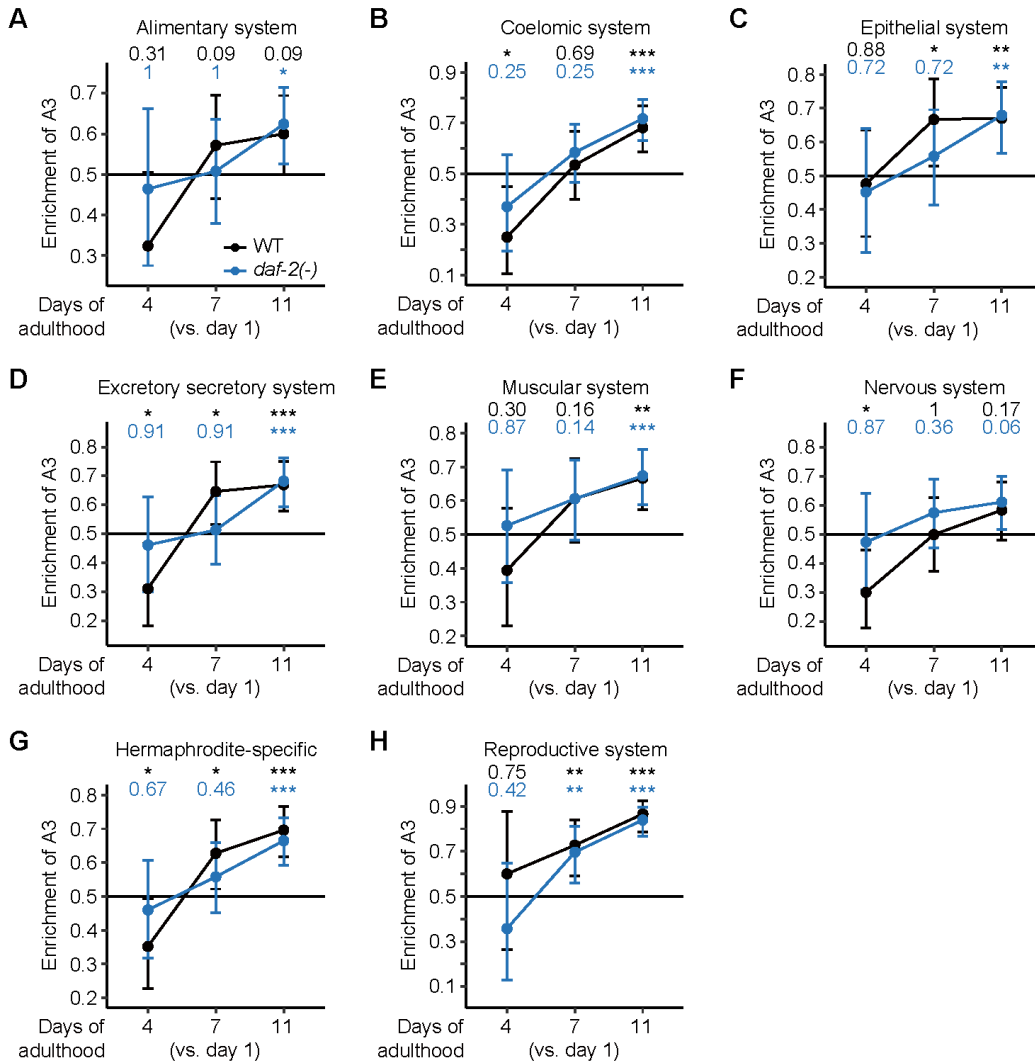

183

184 **Supplemental Fig. S12. *daf-2* mutations decelerate age-dependent increases in**

185 **the A3 usage in somatic tissues.** Enrichment of A3 in transcript isoforms that were

186 up-regulated among isoforms whose fractions changed during aging in alimentary

187 (**A**), coelomic (**B**), epithelial (**C**), excretory secretory (**D**), muscular (**E**), nervous (**F**),

188 hermaphrodite-specific (**G**), and reproductive (**H**) systems (Kaletsky et al. 2018) in

189 wild-type (WT) and *daf-2(e1370)* [*daf-2(-)*] animals. Adjusted *p* values are shown at

190 the top, calculated by one-proportion z-test and adjusted using false discovery rates

191 (\*adjusted *p* < 0.1, \*\*adjusted *p* < 0.01, \*\*\*adjusted *p* < 0.001). *daf-2* mutations

192 decreased the slope of the age-dependent increase in A3 or delayed the increase in  
193 A3 in genes enriched in somatic tissues, but not in reproductive system.

### Supplemental Fig. S13

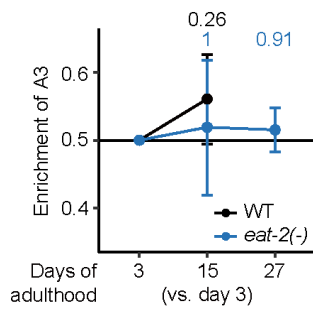

194

195 **Supplemental Fig. S13. Dietary restriction mimetic *eat-2* mutations tend to**  
196 **slow age-dependent increases in the A3 usage.** The enrichment of A3 in  
197 transcript isoforms that were up-regulated among isoforms whose fractions changed  
198 during aging in wild-type (WT) and *eat-2(ad1116)* [*eat-2(-)*] animals (Heintz et al.  
199 2017). Adjusted *p* values are shown at the top, calculated by one-proportion z-test  
200 and adjusted using false discovery rates. Because of a relatively large variance  
201 among samples (confidence interval = 0.13), WT animals exhibited marginal age-  
202 dependent increases in A3 at day 15 of adulthood compared with day 3 of adulthood  
203 (*p* = 0.26). Nevertheless, A3 did not exhibit significant changes in *eat-2(-)* mutants  
204 until day 27 of adulthood (CI = 0.20 and *p* = 1 in day 15, CI = 0.06 and *p* = 0.91 in  
205 day 27).



## Supplemental Fig. S14

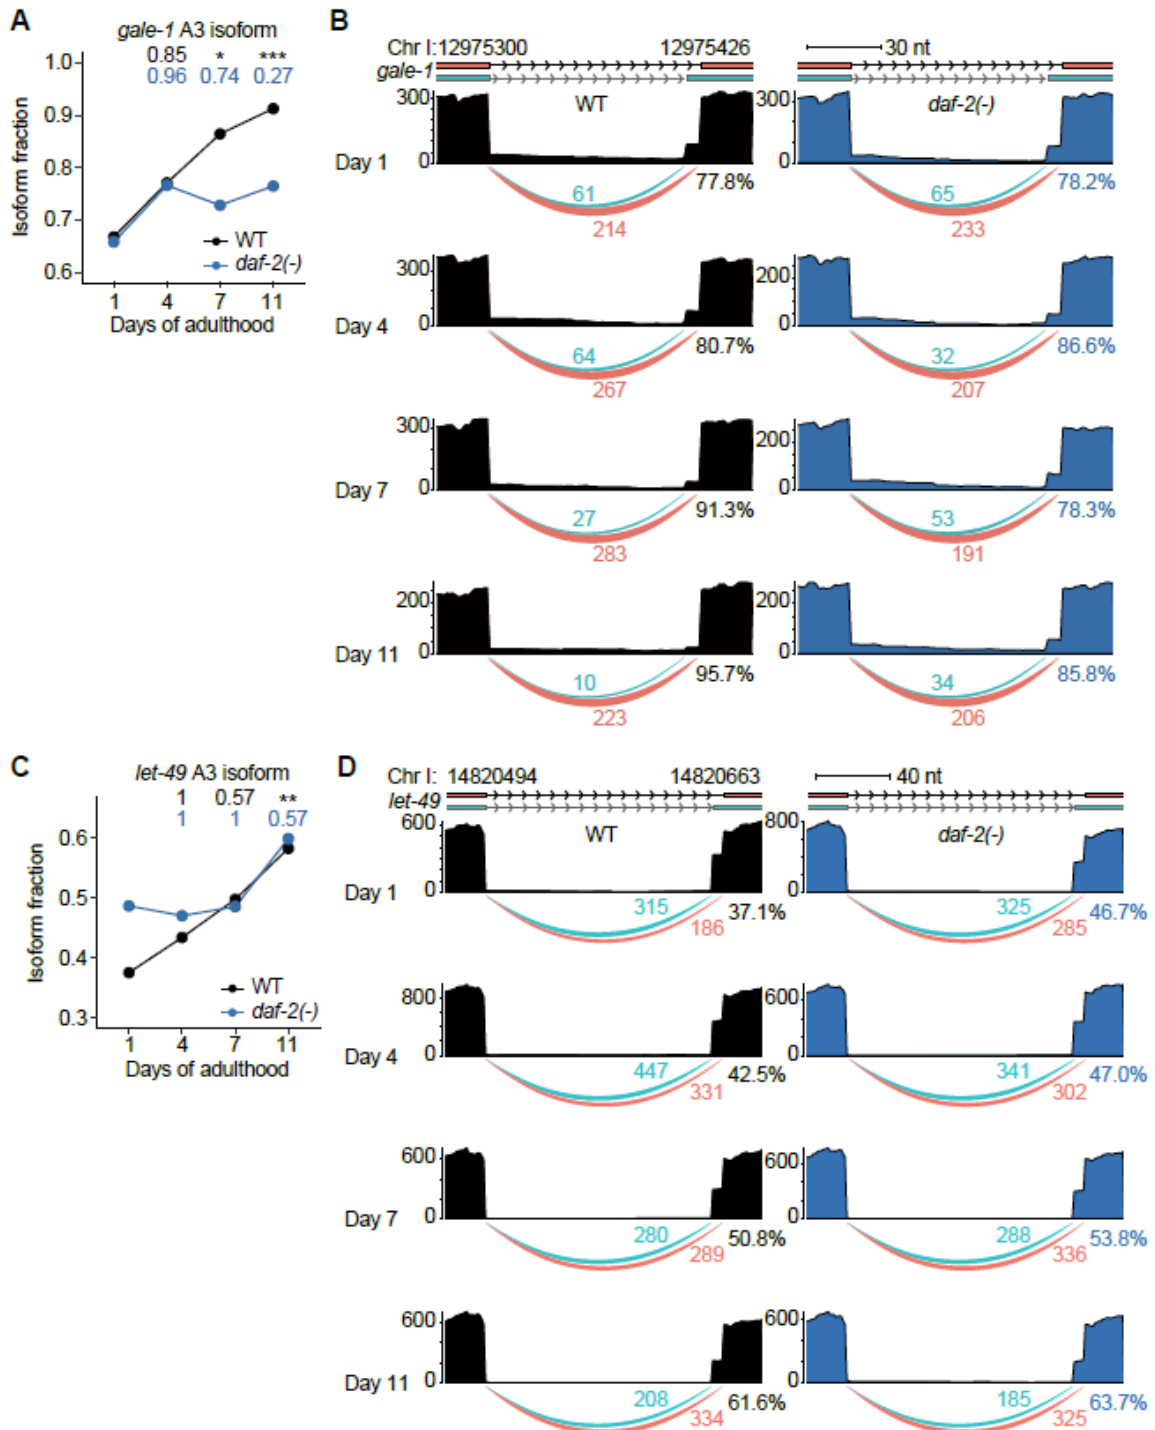

206

207 **Supplemental Fig. S14. *daf-2* mutations slow age-dependent increases in the**  
 208 **usage of distal 3' splice sites in *gale-1* and *let-49* A3 isoforms. (A, C) Changes in**  
 209 **isoform fraction of *gale-1* (A) and *let-49* (C) A3 isoforms during aging in wild-type**

210 (WT) and *daf-2(e1370)* [*daf-2(-)*] animals. Adjusted *p* values are shown at the top,  
211 calculated relative to day 1 of adulthood data using IsoformSwitchAnalyzeR  
212 (\*\*adjusted *p* < 0.01). (**B, D**) Aligned reads (top) and junction usage (bottom) of *gale-*  
213 *1* (Chr I: 12975300–12975426) (**B**) and *let-49* (Chr I: 14820494–14820663) (**D**) A3  
214 isoforms in WT and *daf-2(-)* animals at indicated ages. Pink lines represent junctions  
215 with distal 3' splice sites, whereas cyan lines represent those with proximal 3' splice  
216 sites. Numbers below the lines indicate the numbers of reads aligned at the  
217 junctions. Percent numbers represent the ratios of reads at junctions with distal 3'  
218 splice sites to total reads at junctions with proximal and distal 3' splice sites.

## Supplemental Fig. S15

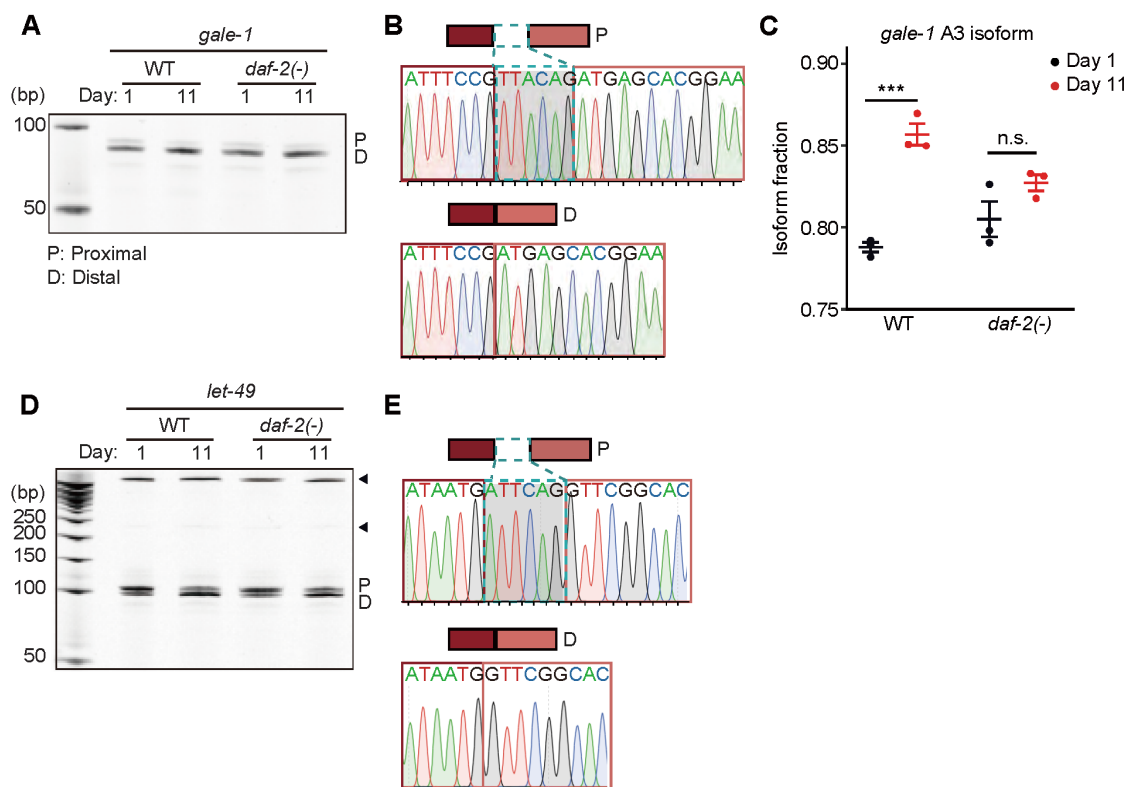

219

220 **Supplemental Fig. S15. Verification of the down-regulation of age-dependent**  
 221 **increases in the usage of distal 3' splice sites in *gale-1* and *let-49* A3 isoforms**  
 222 **by *daf-2* mutations. (A)** RT-PCR analysis of the proximal (P) and distal (D) splice  
 223 sites of *gale-1* isoforms at days 1 and 11 of adulthoods. **(B)** Sequences and  
 224 electropherograms of RT-PCR amplicons of *gale-1* isoforms. **(C)** Isoform fraction of  
 225 *gale-1* A3 isoforms that were obtained from three independent RT-PCR experiments.  
 226 Error bars represent standard error of the mean (SEM). *p* values were calculated by  
 227 using two-tailed Student's *t*-test relative to day 1 of adulthood data (\*\**p* < 0.001,  
 228 n.s.: not significant). See Source files for statistical analysis of the RT-PCR data  
 229 shown in this figure and Supplemental Table S4 for primer sequences used in this  
 230 RT-PCR. **(D)** RT-PCR analysis of the P and D splice sites of *let-49* isoforms at days  
 231 1 and 11 of adulthoods. Arrowheads indicate nonspecific bands. **(E)** Sequences and

232 electropherograms of RT-PCR amplicons of *let-49* isoforms.

## Supplemental Fig. S16

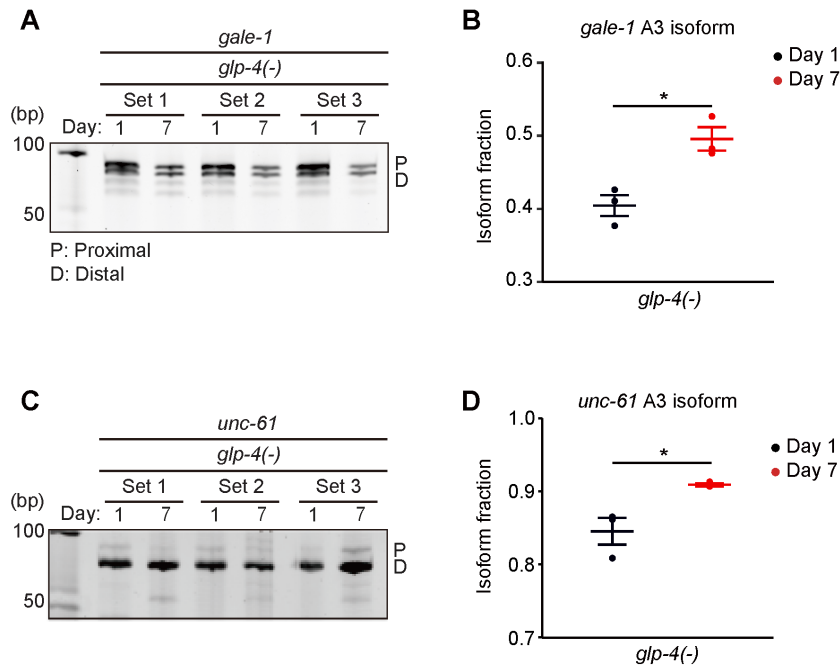

233

234 **Supplemental Fig. S16. The age-dependent increases in the usage of distal 3'**  
 235 **splice sites in *gale-1* and *unc-61* A3 isoforms occur in germline-defective *glp-4***  
 236 **mutants. (A) RT-PCR analysis of the proximal (P) and distal (D) splice sites of *gale-***  
 237 ***1* isoforms in *glp-4(bn2ts)* [*glp-4(-)*] at days 1 and 7 of adulthoods. (B) Isoform**  
 238 **fraction of *gale-1* A3 isoforms that were obtained from three independent RT-PCR**  
 239 **experiments. (C) RT-PCR analysis of the P and D splice sites of *unc-61* isoforms in**  
 240 ***glp-4(-)* mutants at days 1 and 7 of adulthoods. (D) Isoform fraction of *unc-61* A3**  
 241 **isoforms that were obtained from three independent RT-PCR experiments. Error**  
 242 **bars represent standard error of the mean (SEM). *p* values were calculated by using**  
 243 **two-tailed Student's *t*-test relative to day 1 adulthood data ( $*p < 0.05$ . See Source**  
 244 **files for statistical analysis of the RT-PCR data shown in this figure and**  
 245 **Supplemental Table S4 for primer sequences used in this RT-PCR).**

246

247 **Supplemental Table S1. Age-dependently regulated transcripts associated with**  
248 **physiological or chronological aging.**

249 **Supplemental Table S2. Age-dependently regulated gene ontology terms**  
250 **associated with physiological or chronological aging.**

251 **Supplemental Table S3. A3 isoforms that were differentially regulated in wild-**  
252 **type and *daf-2* mutant animals in old age compared with those at day 1 of**  
253 **adulthood.**

254 **Supplemental Table S4. List of RT-PCR primers used in this study.**
