# Supplementary material for: Systematic transcriptome analysis associated with physiological and chronological aging in Caenorhabditis elegans
Source: PubMed Central journal article supplement — Genome Res. 2022 Nov-Dec;32(11-12):2003–14. doi: 10.1101/gr.276515.121 (PMC9808617; doi:10.1101/gr.276515.121), 2022
Supplement: supp_gr.276515.121_Supplemental_Methods.pdf [file supp_gr.276515.121_Supplemental_Methods.pdf]

## 1 **Supplemental Methods**

### 2 **RNA library preparation and sequencing**

3 To synchronize the stages of wild-type and *daf-2(e1370)* animals, embryos were  
4 obtained by a bleaching method (Hwang et al. 2014) and incubated in S-basal buffer  
5 [5.85 g NaCl, 1 g K<sub>2</sub>HPO<sub>4</sub>, 6 g KH<sub>2</sub>PO<sub>4</sub>, 1 mL cholesterol (5 mg/mL in ethanol) in 1 L  
6 of double-distilled water (ddH<sub>2</sub>O)] for 16 h at 20°C with gentle rotation. Animals were  
7 placed and cultured on OP50-seeded NGM plates until they reached L4 larval stage  
8 at 20°C, unless described otherwise. The animals were then treated with 50 µM 5-  
9 fluoro-2'-deoxyuridine (FUDR; SigmaAldrich, MO, USA) to prevent progeny from  
10 hatching. The wild-type and *daf-2(e1370)* animals were subsequently harvested with  
11 M9 buffer (5 g NaCl, 6 g Na<sub>2</sub>HPO<sub>4</sub>, 3 g KH<sub>2</sub>PO<sub>4</sub>, 1 mL 1 M MgSO<sub>4</sub> in 1 L ddH<sub>2</sub>O) at  
12 days 1, 4, 7, and 11 of adulthood. For experiments with *glp-4(bn2ts)* animals, fertile  
13 adult animals cultured at 15°C (a permissive temperature) were bleached for  
14 obtaining eggs, and transferred to 25°C (a restrictive temperature) from the  
15 embryonic stage to prevent the development of germ line. The synchronized animals  
16 that were continuously grown at 25°C were then harvested with M9 buffer at days 1  
17 and 7 of adulthood. Total RNA was isolated using RNAiso plus (Takara, Shiga,  
18 Japan) following the manufacturer's instruction. cDNA library was prepared and  
19 paired-end RNA-sequencing was performed by using Illumina NovaSeq 6000  
20 platform (Macrogen Inc., Seoul, South Korea). Three independent biological  
21 replicates were used for RNA-seq library preparation and subsequent analysis.

22

### 23 **Identification of age-dependently regulated transcripts and terms**

24 Sequenced reads were aligned to the *C. elegans* genome WBcel235 (ce11) and  
25 Ensembl transcriptome (release 98) by using STAR (v.2.7.0e) (Dobin et al. 2013).  
26 We used cutoffs of minimum total read count per junction for (1) non-canonical  
27 motifs, (2) GT/AG and CT/AC motif, (3) GC/AG and CT/GC motif, and (4) AT/AC and  
28 GT/AT motif as 3, 1, 1, and 1, respectively, following previously described methods  
29 (Dobin et al. 2013). The aligned reads to genes and transcripts were quantified by  
30 using RSEM (v.1.3.1) (Li and Dewey 2011). The alignment and quantification were  
31 performed by using parameters described in the guidelines of ENCODE long RNA-  
32 seq processing pipeline (<https://www.encodeproject.org/pipelines/ENCPL002LPE/>).  
33 Long non-coding RNAs (Akay et al. 2019) were quantified by using featureCounts  
34 command in Subread package (v.2.0.0) (Liao et al. 2014). The reads aligned to  
35 annotated structural or functional RNA elements were analyzed by using NOISeq  
36 (v.2.28.0) (Tarazona et al. 2015). The efficiency of rRNA depletion was variable  
37 among our samples (3.6–13.3%), but the difference was not significant among ages  
38 or genotypes ( $p > 0.25$ , pairwise two-tailed Welch's *t*-test). Therefore, rRNAs with  
39 random effects were interpreted as noises. To measure the expression levels of  
40 introns in individual genes, the exon-intron split analysis was adopted (Gaidatzis et  
41 al. 2015). Reads at all known transcript isoforms of a gene were added to obtain the  
42 exon level of the gene. The exon level was subtracted from the sum of reads at  
43 whole genic regions of the gene and the value represents the intron level of the  
44 gene. Subsequently, the exon and the intron levels were compared for a single gene.  
45 Expression changes of various regions at different ages were calculated by using  
46 DESeq2 (v.1.22.2) (Love et al. 2014). Wald test *p* values were adjusted for multiple  
47 testing using the procedure of Benjamini and Hochberg (BH procedure). Differentially

48 expressed genes and transcript isoforms (fold change > 2 and adjusted  $p$  value <  
49 0.05) were then identified. Global expression changes of previously published gene  
50 sets were represented as normalized enrichment scores (NES) by using GSEA  
51 (v.3.0) (Subramanian et al. 2005). Significant gene sets (false discovery rate  $q$  value  
52 < 0.1) were then identified.

53

#### 54 **Analysis of RNA-processing events in age-dependently regulated transcript** 55 **isoforms**

56 Unannotated transcripts were detected and all detected transcripts were quantified  
57 by using Cufflinks (v.2.2.1) (Trapnell et al. 2010) based on the reads aligned to the  
58 Ensembl transcriptome by using STAR (v.2.7.0e) (Dobin et al. 2013). Difference in  
59 transcript level and relative isoform fraction at different ages were calculated by  
60 using IsoformSwitchAnalyzeR (v.1.10.0) (Vitting-Seerup and Sandelin 2019).  $p$   
61 values were adjusted for multiple testing using the BH procedure. Transcripts that  
62 originated from possible polymerase run-on fragments and genomic repeat elements  
63 were excluded. In subsequent analysis of RNA-processing events, genes with more  
64 than two transcript isoforms were considered. Gene expression contribution to  
65 variance in isoform level was calculated based on R-squared values of simple linear  
66 regression to predict isoform levels at different ages. Differential transcript isoforms  
67 (isoform fraction > 0.1 and adjusted  $p$  value < 0.1) were identified. Enrichment of  
68 each RNA-processing event in age-dependently upregulated isoforms relative to  
69 age-dependently downregulated ones was calculated by using  
70 IsoformSwitchAnalyzeR (v.1.10.0). Sequence composition and strength of regions  
71 surrounding certain splice sites were visualized and calculated by using WebLogo (v.

72 3.7.4) (Crooks et al. 2004) and MaxEntScan (Yeo and Burge 2004), respectively.

73

#### 74 **Analysis of transcripts associated with physiological and chronological aging**

75 To dissect the difference between chronological and physiological ages at transcript  
76 levels, transcripts were selected if their levels were upregulated or downregulated  
77 (absolute fold change > 2 and BH-adjusted  $p$  value < 0.05) in aged animals by using  
78 a simple regression model with genotypes and ages. The transcripts were chosen if  
79 their normalized levels of transcript per million (TPM) were affected by ages ( $p$  value  
80 < 0.05) in the two-way ANOVA. Transcripts associated with physiological aging were  
81 defined if their normalized levels were affected by either genotypes or the interaction  
82 between genotypes and ages ( $p$  value < 0.05). Transcripts associated with temporal  
83 shift were defined if their normalized levels were affected by genotypes ( $p$  value <  
84 0.05), but not by the interaction ( $p$  value > 0.1). In contrast, transcripts associated  
85 with slope change were defined if their normalized levels were affected by the  
86 interaction ( $p$  value < 0.05), but not by genotypes ( $p$  value > 0.1). Transcripts  
87 associated with chronological aging were defined if their normalized levels were  
88 independent of genotypes ( $p$  value > 0.1), and the interaction between genotypes  
89 and ages ( $p$  value > 0.1). Age-dependently regulated gene sets were selected if their  
90 expression was upregulated or downregulated both in wild-type and *daf-2* mutant  
91 animals. Among them, the gene sets were selected if their expression was  
92 significantly changed (absolute NES > 0.5 and  $q$  value < 0.1) during aging in either  
93 wild-type or *daf-2* mutant animals. Gene sets for physiological aging were  
94 determined as follows. First, genes associated with temporal shift were defined if the  
95 difference of NES between wild-type and *daf-2* mutant animals was greater than 0.2

196 at least at one age, and if the range of the differences was within  $\pm 0.2$  in all the  
197 tested ages. Second, the association of gene sets with slope change was  
198 determined if the difference of NES slope between wild-type and *daf-2* mutant  
199 animals was greater than 0.5. Gene sets associated with chronological aging were  
200 defined if the difference of NES between wild-type and *daf-2* mutant animals was  
201 smaller than 0.2 at all the tested ages. Among genes that encode components  
202 annotated as “RNA processing”, genes whose expression was significantly  
203 downregulated in wild-type animals but not in *daf-2* mutants (difference of likelihood-  
204 ratio test statistics between wild-type and *daf-2* mutant animals  $> 2$  and *p* value of  
205 likelihood-ratio test  $> 0.1$  in *daf-2* mutants) were selected for lifespan assays. For the  
206 analysis of RNA-processing events, significance levels at different ages were  
207 separately compared. For the analysis of A3 in genes that were enriched in various  
208 systems, expressed genes enriched in the male-specific system were not included  
209 because of irrelevance, as our RNA-seq data were generated using hermaphrodites.  
210 Isoform fraction and junction usage of particular transcripts were visualized by using  
211 Gviz (v.1.34.1) (Hahne and Ivanek 2016). R (v.4.0.2, <http://www.r-project.org>) was  
212 used for plotting all the data in this study. The published sequencing data used in this  
213 study are available from NCBI-SRA (<https://www.ncbi.nlm.nih.gov/sra>) and Gene  
214 Expression Omnibus.

215

## 216 **Lifespan assays**

217 Lifespan assays were conducted at 20°C using adult *C. elegans* on NGM plates  
218 containing 50  $\mu\text{g}/\text{mL}$  ampicillin (USB, Cleveland, OH, USA) and 1 mM isopropyl- $\beta$ -D-  
219 thiogalactoside (IPTG; Gold Biotechnology, St. Louis, MO, USA) seeded with *E. coli*

120 strain HT115 that expresses double-stranded RNA targeting a specific gene (RNAi  
121 bacteria), as described previously (Park et al. 2020). For whole-life RNAi lifespan  
122 assays, gravid day 1 adult animals were allowed to lay eggs on RNAi bacteria-  
123 seeded plates and the progeny were grown to reach a pre-fertile adult stage. The  
124 pre-fertile adult animals were transferred to new RNAi bacteria-seeded plates  
125 containing 5  $\mu$ M FUDR to prevent progeny from hatching. For adult-only RNAi  
126 lifespan assays, gravid day 1 adult animals were allowed to lay eggs on HT115  
127 containing empty RNAi plasmid (L4440; control RNAi bacteria) and the progeny were  
128 grown to reach L4 larval stage. The L4-stage animals were then transferred to new  
129 plates seeded with RNAi bacteria targeting a specific gene. On the next day, pre-  
130 fertile or gravid adults were transferred to new RNAi bacteria-seeded plates  
131 containing FUDR. Two biological replicates of experiments were performed by two  
132 independent researchers for all the lifespan assays. Lifespan assays were performed  
133 double-blindly; the researchers were unaware of which genes were targeted by RNAi  
134 clones during the experiments. Animals that did not respond to gentle touch with a  
135 platinum wire were considered as dead. Animals that crawled off the plates,  
136 displayed internal hatching or vulval rupture were censored but included in the  
137 statistical analysis. Statistical analysis of the lifespan data was conducted using  
138 online application of the survival analysis 2 (<http://sbi.postech.ac.kr/oasis2>) (Han et  
139 al. 2016). *p* values were calculated using the log-rank (Mantel-Cox) test.

140

#### 141 **Quantitative reverse transcription PCR**

142 Stage-synchronized animals were obtained by using an embryo-bleaching method  
143 (Stiernagle 2006). Animals were cultured until reaching a pre-fertile adult stage, and

144 harvested with M9 buffer containing 0.01% polyethylene glycol 4000 (PEG 4000,  
145 Tokyo Chemical Industry, Tokyo, Japan), washed three times, and stored at  $-80^{\circ}\text{C}$   
146 before RNA isolation. For whole-life RNAi treatments, synchronized embryos were  
147 placed on RNAi bacteria-seeded plates and cultured until reaching a pre-fertile adult  
148 stage. For adult-only RNAi experiments, synchronized embryos were placed on  
149 control RNAi bacteria-seeded plates and transferred to plates seeded with each of  
150 indicated RNAi bacteria at L4 larval stage. Animals were harvested 24 h after the  
151 transfer. Total RNA was isolated by using RNAiso Plus (Takara, Shiga, Japan)  
152 following the manufacturer's instruction. cDNA was synthesized from 1  $\mu\text{g}$  of isolated  
153 total RNA by using ImProm-II Reverse Transcriptase (Promega, Madison, WI, USA)  
154 with random hexamer primers (25 ng/ $\mu\text{L}$ ; Cosmo Genetech, South Korea).  
155 Quantitative reverse transcription PCR was performed with *Power SYBR Green PCR*  
156 Master Mix (Thermo Fisher Scientific, Waltham, MA, USA) using StepOne real-time  
157 PCR system (Applied Biosystems, Thermo Fisher Scientific, Waltham, MA, USA).  
158 Comparative  $C_{\text{T}}$  method was used to calculate the relative quantity of each target.  
159 *ama-1* was used as an endogenous control for normalization.  $p$  values were  
160 calculated by two-tailed Student's  $t$  test.

161

## 162 **Reverse transcription PCR**

163 One microgram of total RNA from each sample was used for reverse transcription  
164 (RT) experiments. For A3 isoforms, gene-specific primers (10  $\mu\text{M}$ ) were used in a  
165 PCR reaction with 5  $\mu\text{L}$  cDNA from an RT reaction. The PCR reaction conditions for  
166 *gale-1* and *unc-61* were annealing temperatures  $62^{\circ}\text{C}$  and  $55^{\circ}\text{C}$ , and the elongation  
167 time 15 sec with 23 and 25 cycles, respectively. For *let-49*, annealing temperature

168 60°C and the elongation time 15 sec with 30 cycles were optimal PCR conditions,  
169 but nonspecific bands were detected (Supplemental Fig. S15 D, E). Therefore, *let-49*  
170 was not further characterized for the RT-PCR analysis of A3. Primer sequences are  
171 available in Supplemental Table S4. Ten microliter of the product was run on a 12%  
172 TBE (Tris-Boric acid-EDTA)-urea gel [8 M urea, 7.5 mL 40% acrylamide (19:1), 2.5  
173 mL 10x TBE (890 mM Tris base, 890 mM boric acid, 20 mM EDTA (10x, pH 8.3)),  
174 100 µL 20% ammonium persulfate, 25 µL TEMED] in 1x TBE buffer at 200 V for 90  
175 min. After staining with SYBR® Green II (Invitrogen, Carlsbad, CA, USA, S9305) in  
176 1x TBE for 40 min, the gels were visualized using ChemiDoc XRS+ system (Bio-  
177 Rad, Contra Costa County, CA, USA), and analyzed by using Image Lab software  
178 (Bio-Rad). To estimate changes in A3 ratio, calculation for the quantity of transcripts  
179 that used the distal 3' splice sites ( $\beta$ ) and transcripts that used the proximal 3' splice  
180 sites ( $\alpha$ ) was adopted as below.

$$181 \quad \text{Isoform fraction of A3 isoform} = \beta / (\alpha + \beta)$$

182

## 183 **References**

- 184 Akay A, Jordan D, Navarro IC, Wrzesinski T, Ponting CP, Miska EA, Haerty W. 2019.  
185 Identification of functional long non-coding RNAs in *C. elegans*. *BMC Biol* **17**:  
186 14.
- 187 Crooks GE, Hon G, Chandonia JM, Brenner SE. 2004. WebLogo: a sequence logo  
188 generator. *Genome Res* **14**: 1188-1190.
- 189 Dobin A, Davis CA, Schlesinger F, Drenkow J, Zaleski C, Jha S, Batut P, Chaisson  
190 M, Gingeras TR. 2013. STAR: ultrafast universal RNA-seq aligner.

191            *Bioinformatics* **29**: 15-21.

192    Gaidatzis D, Burger L, Florescu M, Stadler MB. 2015. Analysis of intronic and exonic  
193            reads in RNA-seq data characterizes transcriptional and post-transcriptional  
194            regulation. *Nat Biotechnol* **33**: 722-729.

195    Hahne F, Ivanek R. 2016. Visualizing Genomic Data Using Gviz and Bioconductor. In  
196            *Statistical Genomics: Methods and Protocols*, doi:10.1007/978-1-4939-3578-  
197            9\_16 (ed. E Mathé, S Davis), pp. 335-351. Springer New York, New York, NY.

198    Han SK, Lee D, Lee H, Kim D, Son HG, Yang JS, Lee SV, Kim S. 2016. OASIS 2:  
199            online application for survival analysis 2 with features for the analysis of  
200            maximal lifespan and healthspan in aging research. *Oncotarget* **7**: 56147-  
201            56152.

202    Hwang AB, Ryu EA, Artan M, Chang HW, Kabir MH, Nam HJ, Lee D, Yang JS, Kim  
203            S, Mair WB et al. 2014. Feedback regulation via AMPK and HIF-1 mediates  
204            ROS-dependent longevity in *Caenorhabditis elegans*. *Proc Natl Acad Sci U S*  
205            *A* **111**: E4458-4467.

206    Li B, Dewey CN. 2011. RSEM: accurate transcript quantification from RNA-Seq data  
207            with or without a reference genome. *BMC Bioinformatics* **12**: 323.

208    Liao Y, Smyth GK, Shi W. 2014. featureCounts: an efficient general purpose program  
209            for assigning sequence reads to genomic features. *Bioinformatics* **30**: 923-  
210            930.

211    Love MI, Huber W, Anders S. 2014. Moderated estimation of fold change and  
212            dispersion for RNA-seq data with DESeq2. *Genome Biol* **15**: 550.

213 Park S, Artan M, Han SH, Park HH, Jung Y, Hwang AB, Shin WS, Kim KT, Lee SV.  
214 2020. VRK-1 extends life span by activation of AMPK via phosphorylation. *Sci*  
215 *Adv* **6**.

216 Stiernagle T. 2006. Maintenance of *C. elegans*. *WormBook*  
217 doi:10.1895/wormbook.1.101.1: 1-11.

218 Subramanian A, Tamayo P, Mootha VK, Mukherjee S, Ebert BL, Gillette MA,  
219 Paulovich A, Pomeroy SL, Golub TR, Lander ES et al. 2005. Gene set  
220 enrichment analysis: a knowledge-based approach for interpreting genome-  
221 wide expression profiles. *Proc Natl Acad Sci U S A* **102**: 15545-15550.

222 Tarazona S, Furio-Tari P, Turra D, Pietro AD, Nueda MJ, Ferrer A, Conesa A. 2015.  
223 Data quality aware analysis of differential expression in RNA-seq with NOISeq  
224 R/Bioc package. *Nucleic Acids Res* **43**: e140.

225 Trapnell C, Williams BA, Pertea G, Mortazavi A, Kwan G, van Baren MJ, Salzberg  
226 SL, Wold BJ, Pachter L. 2010. Transcript assembly and quantification by  
227 RNA-Seq reveals unannotated transcripts and isoform switching during cell  
228 differentiation. *Nat Biotechnol* **28**: 511-515.

229 Vitting-Seerup K, Sandelin A. 2019. IsoformSwitchAnalyzeR: analysis of changes in  
230 genome-wide patterns of alternative splicing and its functional consequences.  
231 *Bioinformatics* **35**: 4469-4471.

232 Yeo G, Burge CB. 2004. Maximum entropy modeling of short sequence motifs with  
233 applications to RNA splicing signals. *J Comput Biol* **11**: 377-394.

234
