# Supplementary material for: Systematic transcriptome analysis associated with physiological and chronological aging inCaenorhabditis elegans
Source: HighWire-hosted journal article supplement (doi:10.1101/gr.276515.121), 2022-11-01
Supplement: Supplemental_Source.xlsx [file Supplemental_Source.xlsx]

## Sheet: Fig. 6G-K and Fig. S10
Lifespan data analysis.
Strain/treatment	Mean lifespan ± s.e.m. (days)	75th percentile	% lifespan change	Number of animals that died/total	p value vs. control	Figure in text
WT/	21.0±0.4	25		111/150		Fig. 6I,K, Fig. S9B,D,E		WT: wild-type
control RNAi								Different experimental sets are distinguished by double-solid lines, and biological replicates within the same experimental set are distinguished by single-solid lines.
WT/	16.7±0.2	18	-0.204	136/150	<0.0001	Fig. S10B		Biological replicate experiments were performed in parallel, and statistical analysis was performed within each replicate experiment.
daf-16 RNAi								Percent lifespan changes and p values were calculated against control RNAi-treated conditions within the same genetic background otherwise noted with the superscript described below.
WT/	16.8±0.4	18	-0.202	82/150	<0.0001	Fig. 6K		Lifespan assay was performed using whole-life RNAi treatment except those noted with “#”, which were performed using adult-only RNAi treatment. p values were calculated using Mantel-Cox log-rank test.
F30A10.9 RNAi								WT: percent lifespan change or p value against wild-type (WT)/control RNAi
WT/	16.9±0.3	20	-0.193	138/150	<0.0001	Fig. 6I
plrg-1 RNAi
WT/	13.5±0.2	14	-0.359	130/150	<0.0001	Fig. S10D
ints-1 RNAi
WT/	12.1±0.1	12	-0.425	132/148	<0.0001	Fig. S10E
R08D7.1 RNAi
daf-2(e1370)/ control RNAi	41.2±0.8	48	96.1%WT	116/150	<0.0001WT	Fig. 6I,K Fig. S10B,D,E
daf-2(e1370)/	23.4±0.4	25	-0.431	108/120	<0.0001	Fig. S10B
daf-16 RNAi
daf-2(e1370)/	27.1±1.2	35	-0.342	90/150	<0.0001	Fig. 6K
F30A10.9 RNAi
daf-2(e1370)/	26.3±0.5	29	-0.362	138/150	<0.0001	Fig. 6I
plrg-1 RNAi
daf-2(e1370)/	22.4±0.5	25	-0.457	137/150	<0.0001	Fig. S10D
ints-1 RNAi
daf-2(e1370)/	20.5±0.3	24	-0.503	133/141	<0.0001	Fig. S10E
R08D7.1 RNAi
WT/	19.6±0.3	22		125/150
control RNAi
WT/	16.6±0.3	19	-0.156	142/150	<0.0001
daf-16 RNAi
WT/	17.9±0.4	22	-0.085	86/150	<0.01
F30A10.9 RNAi
WT/	16.1±0.4	19	-0.18	142/150	<0.0001
plrg-1 RNAi
WT/	13.0±0.2	16	-0.337	135/150	<0.0001
ints-1 RNAi
WT/	11.0±0.1	13	-0.437	145/150	<0.0001
R08D7.1 RNAi
daf-2(e1370)/ control RNAi	33.1±0.7	38	68.9%WT	81/90	<0.0001WT
daf-2(e1370)/	20.6±0.4	22	-0.379	130/150	<0.0001
daf-16 RNAi
daf-2(e1370)/	21.6±0.8	28	-0.347	113/150	<0.0001
F30A10.9 RNAi
daf-2(e1370)/	24.0±0.5	28	-0.276	83/90	<0.0001
plrg-1 RNAi
daf-2(e1370)/	18.2±0.5	25	-0.427	131/150	<0.0001
ints-1 RNAi
daf-2(e1370)/	18.9±0.4	21	-0.429	122/133	<0.0001
R08D7.1 RNAi
WT/	19.2±0.4	21		119/150
control RNAi
WT/	17.8±0.5	21	-0.071	115/150	<0.05
daf-16 RNAi
WT/	18.3±0.4	21	-0.047	122/150	0.1806
F40F8.11 RNAi
WT/	17.6±0.4	21	-0.081	112/150	<0.05
alkb-8 RNAi
WT/	19.1±0.4	21	-0.005	124/150	0.8937
smu-1 RNAi
WT/	14.3±0.3	15	-0.254	145/150	<0.0001
prp-21 RNAi
WT/	18.9±0.4	21	-0.014	110/150	0.713
C06E1.9 RNAi
daf-2(e1370)/	36.3±0.8	40	88.9%WT	142/150	<0.0001WT
control RNAi
daf-2(e1370)/	24.1±0.7	30	-0.336	100/120	<0.0001
daf-16 RNAi
daf-2(e1370)/	35.7±0.7	40	-0.017	138/150	0.2266
F40F8.11 RNAi
daf-2(e1370)/	31.9±1.1	40	-0.12	102/121	<0.001
alkb-8 RNAi
daf-2(e1370)/	35.2±1.0	40	-0.028	120/120	0.9168
smu-1 RNAi
daf-2(e1370)/	24.5±0.9	30	-0.325	89/100	<0.0001
prp-21 RNAi
daf-2(e1370)/	36.6±0.8	42	0.009	126/150	0.6267
C06E1.9 RNAi
WT/	19.0±0.4	22		124/150		Fig. S10C, F, G, H, I
control RNAi
WT/	16.0±0.3	18	-0.159	99/120	<0.0001
daf-16 RNAi
WT/	18.4±0.4	22	-0.034	111/150	0.3239	Fig. S10C
F40F8.11 RNAi
WT/	19.5±0.4	22	0.027	82/150	0.4349	Fig. S10F
alkb-8 RNAi
WT/	18.6±0.3	22	-0.023	131/150	0.3043	Fig. S10G
smu-1 RNAi
WT/	13.5±0.3	15	-0.289	136/150	<0.0001	Fig. S10H
prp-21 RNAi
WT/	19.0±0.4	22	-0.003	98/120	0.562	Fig. S10I
C06E1.9 RNAi
daf-2(e1370)/	38.3±0.6	41	101.4%WT	117/120	<0.0001WT	Fig. S10C, F, G, H, I
control RNAi
daf-2(e1370)/	24.9±0.4	29	-0.35	135/150	<0.0001
daf-16 RNAi
daf-2(e1370)/	35.8±0.7	41	-0.067	109/120	<0.01	Fig. S10C
F40F8.11 RNAi
daf-2(e1370)/	35.3±0.6	38	-0.08	105/120	<0.0001	Fig. S10F
alkb-8 RNAi
daf-2(e1370)/	36.8±0.6	41	-0.04	136/150	0.0536	Fig. S10G
smu-1 RNAi
daf-2(e1370)/	26.9±0.4	31	-0.298	118/125	<0.0001	Fig. S10h
prp-21 RNAi
daf-2(e1370)/	36.5±0.7	41	-0.048	115/120	0.0813	Fig. S10I
C06E1.9 RNAi
WT/	22.0±0.4	26		94/120		Fig. 6H, J
control RNAi#
WT	17.7±0.2	20	-0.196	135/150	<0.0001
daf-16 RNAi#
WT/	13.7±0.1	15	-0.376	122/150	<0.0001	Fig. 6J
pfs-2 RNAi#
WT/	15.6±0.2	18	-0.288	145/150	<0.0001	Fig. 6H
prp-8 RNAi#
daf-2(e1370)/	42.1±0.9	47	91.7%WT	84/120	<0.0001WT	Fig. 6H, J
control RNAi#
daf-2(e1370)/	24.2±0.4	26	-0.426	134/150	<0.0001
daf-16 RNAi#
daf-2(e1370)/	20.1±0.2	23	-0.524	106/120	<0.0001	Fig. 6J
pfs-2 RNAi#
daf-2(e1370)/	41.2±0.6	47	-0.023	143/150	0.2574	Fig. 6H
prp-8 RNAi#
WT/	19.7±0.3	23		142/150
control RNAi#
WT	16.0±0.3	19	-0.189	144/150	<0.0001
daf-16 RNAi#
WT/	13.4±0.1	14	-0.319	106/150	<0.0001
pfs-2 RNAi#
WT/	14.1±0.2	16	-0.284	143/150	<0.0001
prp-8 RNAi#
daf-2(e1370)/	42.0±0.8	51	113.4%WT	132/150	<0.0001WT
control RNAi#
daf-2(e1370)/	23.6±0.4	27	-0.437	142/150	<0.0001
daf-16 RNAi#
daf-2(e1370)/	21.2±0.3	24	-0.496	144/150	<0.0001
pfs-2 RNAi#
daf-2(e1370)/	41.7±0.7	48	-0.006	135/150	0.1897
prp-8 RNAi#

## Sheet: Fig. 8C, E
RT-PCR analysis of A3 transcript changes with age.
Figure 8C,E. RT-PCR (unc-61)
(N=3)	WT day 1						WT day 11						daf-2(e1370) day 1						daf-2(e1370) day 11
	Proximal			Distal			Proximal			Distal			Proximal			Distal			Proximal			Distal
	Set 1	Set 2	Set 3	Set 1	Set 2	Set 3	Set 1	Set 2	Set 3	Set 1	Set 2	Set 3	Set 1	Set 2	Set 3	Set 1	Set 2	Set 3	Set 1	Set 2	Set 3	Set 1	Set 2	Set 3
Volume (Int)	1514646	2282368	8665976	2842875	4098624	12900203	1541799	1440256	6343495	5554836	5047744	16700762	2005290	1928640	6728599	3668490	3505024	9917919	1705725	2181056	4527102	3846591	4303680	8019166
Isoform fraction				0.652406	0.642318	0.598168				0.782742	0.778012	0.724726				0.646569	0.645057	0.595795				0.69279	0.663663	0.639167
p value vs. day 1										<0.01												0.188347
																				daf-2(e1370) [daf-2(-)]
																				Volume (Int): Volume of the band intensity
																				β: the quantity of transcripts [volume of the band intensity (Int)] that used the distal 3′ splice sites
																				α: the quantity of transcripts [volume of the band intensity (Int)] that used the proximal 3′ splice sites
																				Isoform fraction of A3 isoform = β / (α + β)

## Sheet: Fig. 8F, G
RT-PCR analysis of A3 changes in control RNAi- and F30A10.9 RNAi-treated animals.
Figure 8F,G. RT-PCR (unc-61)
(N=3)	Control RNAi WT day 1 WT day 1 WT day 1 Control RNAi WT day 1 Control RNAi WT day 1						Control RNAi WT day 11						F30A10.9 RNAi WT day 1						F30A10.9 RNAi WT day 11
	Proximal			Distal			Proximal			Distal			Proximal			Distal			Proximal			Distal
Volume (Int)	403260	5762548	862615	681018	7616872	1273805	389844	2494852	454740	923832	6186932	1269190	204204	3210620	715585	369174	5171116	1150370	194220	3275448	887250	343824	5763156	1532895
Isoform fraction				0.628084	0.569298	0.596233				0.703242	0.712634	0.736219				0.643858	0.61695	0.616505				0.639026	0.637616	0.63339
p value vs. day 1										<0.01												0.301525
(N=3)	Control RNAi daf-2(e1370) day 1						Control RNAi daf-2(e1370) day 11						F30A10.9 RNAi daf-2(-) day 1						F30A10.9 RNAi daf-2(e1370) day 11							daf-2(e1370) [daf-2(-)]
	Proximal			Distal			Proximal			Distal			Proximal			Distal			Proximal			Distal				Volume (Int): Volume of the band intensity
Volume (Int)	470886	5974740	930345	899418	10362752	1455610	272142	3705076	712400	936702	6125600	1473680	287898	5745980	898820	447252	10405008	1561365	416520	4108560	983775	1013142	12994328	2231645		β: the quantity of transcripts [volume of the band intensity (Int)] that used the distal 3′ splice sites
Isoform fraction				0.656364	0.634293	0.610074				0.774874	0.623111	0.67412				0.608382	0.644234	0.634653				0.708658	0.759774	0.694045		α: the quantity of transcripts [volume of the band intensity (Int)] that used the proximal 3′ splice sites
p value vs. day 1										0.287033												<0.05				Isoform fraction of A3 isoform = β / (α + β)

## Sheet: Fig. S15A, C
RT-PCR analysis of A3 transcript changes with age.
Figure S15A,C. RT-PCR (gale-1)
(N=3)	WT day 1						WT day 11						daf-2(e1370) day 1						daf-2(e1370) day 11
	Proximal			Distal			Proximal			Distal			Proximal			Distal			Proximal			Distal
	Set 1	Set 2	Set 3	Set 1	Set 2	Set 3	Set 1	Set 2	Set 3	Set 1	Set 2	Set 3	Set 1	Set 2	Set 3	Set 1	Set 2	Set 3	Set 1	Set 2	Set 3	Set 1	Set 2	Set 3
Volume (Int)	5906745	6063590	2380062	21193640	23071230	8932723	3926195	3383120	1689019	22218235	19251440	11279770	5298865	5918900	2093790	20932600	22348560	9962862	4630730	5114785	2167275	20735520	25191140	10808259
Isoform fraction				0.782042	0.791878	0.789613				0.849827	0.850533	0.869763				0.797996	0.790611	0.826337				0.817445	0.831228	0.832972
p value vs. day 1										<0.001												0.136185
																		daf-2(e1370) [daf-2(-)]
																		Volume (Int): Volume of the band intensity
																		β: the quantity of transcripts [volume of the band intensity (Int)] that used the distal 3′ splice sites
																		α: the quantity of transcripts [volume of the band intensity (Int)] that used the proximal 3′ splice sites
																		Isoform fraction of A3 isoform = β / (α + β)

## Sheet: Fig. S15D
See Methods for description.
daf-2(e1370) [daf-2(-)]
																			: non-specific band

## Sheet: Fig.S16A, B
RT-PCR analysis of A3 transcript changes with age.
Figure S16A,B. RT-PCR (gale-1)
(N=3)	glp-4(bn2) day 1						glp-4(bn2) day 7							Volume (Int): Volume of the band intensity
	Proximal			Distal			Proximal			Distal				β: the quantity of transcripts [volume of the band intensity (Int)] that used the distal 3′ splice sites
	Set 1	Set 2	Set 3	Set 1	Set 2	Set 3	Set 1	Set 2	Set 3	Set 1	Set 2	Set 3		α: the quantity of transcripts [volume of the band intensity (Int)] that used the proximal 3′ splice sites
Volume (Int)	42129536	44124928	50269748	31152364	30754564	30457812	23161888	19864092	15403836	21173228	18451460	17209168		Isoform fraction of A3 isoform = β / (α + β)
Isoform fraction				0.425103	0.410721	0.377291				0.477572	0.481566	0.527678
p value vs. day 1										<0.05

## Sheet: Fig.S16C, D
RT-PCR analysis of A3 transcript changes with age.
Figure S16C,D. RT-PCR (gale-1)
(N=3)	glp-4(bn2) day 1						glp-4(bn2) day 7							Volume (Int): Volume of the band intensity
	Proximal			Distal			Proximal			Distal				β: the quantity of transcripts [volume of the band intensity (Int)] that used the distal 3′ splice sites
	Set 1	Set 2	Set 3	Set 1	Set 2	Set 3	Set 1	Set 2	Set 3	Set 1	Set 2	Set 3		α: the quantity of transcripts [volume of the band intensity (Int)] that used the proximal 3′ splice sites
Volume (Int)	7143432	5282019	6468543	45838149	32998767	27302955	5017197	4087215	7268322	52730076	39473865	71494971		Isoform fraction of A3 isoform = β / (α + β)
Isoform fraction				0.865171	0.862019	0.808461				0.913118	0.906173	0.907719
p value vs. day 1										<0.05
