# Supplementary material for: Systematic transcriptome analysis associated with physiological and chronological aging inCaenorhabditis elegans
Source: HighWire-hosted journal article supplement (doi:10.1101/gr.276515.121), 2022-11-01
Supplement: Supplemental_Table_S1.xlsx [file Supplemental_Table_S1.xlsx]

## Sheet: physiological_temporal_shift_up
Supplemental Table S1. Age-dependently regulated transcripts associated with physiological or chronological aging
Age-dependently upregulated transcripts associated with physiological aging: temporal shift
Transcript_ID: Detected transcript, Gene_ID and Gene_name: A gene contains the transcript, WT_d1 to daf-2_d11: Transcript levels in wild-type (WT) and daf-2 mutant animals at different ages
p_genotype: Significance of genotypes on transcript levels, p_age: Significance of ages on transcript levels, p_interaction: Significance of the interaction between genotypes and ages on transcript levels
Transcript_ID	Gene_ID	Gene_name	Description	WT_d1	WT_d4	WT_d7	WT_d11	daf-2_d1	daf-2_d4	daf-2_d7	daf-2_d11	p_genotype	p_age	p_interaction
B0213.17.1	WBGene00015046	nlp-34	Neuropeptide-Like Protein	5.92667	36.22	251.14	498.587	4.77667	19.9233	41.33	83.14	1.42071e-07	2.48863e-08	0.122034
B0238.12.1	WBGene00015076	B0238.12		1.08667	1.83667	4.65333	9.28333	2.47	8.98333	14.9733	52.4433	0.00448496	0.00230795	0.216854
B0513.9a.1	WBGene00007200	vamp-8	VAMP (Vesicle Associated Membrane Protein) homolog	1.73667	1.87	2.53	4.27333	1.92667	2.85	3.34667	4.96667	0.0158155	7.75174e-06	0.673939
C03G6.5.1	WBGene00015393	C03G6.5	UPF0376 protein C03G6.5	1.05333	2.69667	4.69333	3.96333	2.44667	9.07	6.64	6.37333	5.93618e-05	0.000244168	0.311902
C04E12.2.1	WBGene00015433	C04E12.2		2.13	2.73667	5.50333	5.89667	1.37667	1.96667	2.81333	3.19667	0.00043231	0.000251885	0.122731
C05A9.1b.1	WBGene00003999	pgp-5	p-GlycoProtein related	1.72333	2.64667	7.67667	6.45667	1.69	6.42	11.3233	7.37	0.00411935	2.30323e-06	0.150296
C05C10.2a.1	WBGene00007329	C05C10.2	Uncharacterized ATP-dependent helicase C05C10.2	1.81	2.44667	3.48333	4.75667	1.84	3.85333	4.21	6.92333	0.0044806	4.09432e-06	0.153295
C07A12.7a.1	WBGene00015561	C07A12.7		4.54	7.32333	13.63	18.6133	6.81	13.5233	16.7433	21.79	0.00143088	1.99916e-07	0.10597
C08E8.4.1	WBGene00007440	C08E8.4		8.00667	20.7633	37.9567	24.0267	19.9533	60.0967	64.5367	53.73	3.07979e-06	3.22303e-05	0.103969
C09H10.5c.1	WBGene00007499	C09H10.5		0.863333	2.04667	2.75667	3.81333	0.9	2.14	1.55	2.09667	0.00856413	0.000170034	0.181568
C13A10.2.1	WBGene00015729	C13A10.2		0.996667	1.73	4.88	5.74333	0.813333	1.61667	2.63	2.92	2.98768e-05	5.7759e-08	0.270606
C18B2.4.1	WBGene00015955	C18B2.4		3.95333	5.83667	8.00667	11.5733	4.4	8.67	9.98	11.9433	0.0223064	1.17238e-06	0.149103
C24B9.9.1	WBGene00016052	dod-3	Downstream Of DAF-16 (Regulated by DAF-16)	2.34333	5.76667	51.96	39.8633	12.5167	47.0167	116.617	116.763	0.00108979	0.000720851	0.233252
C25H3.10a.1	WBGene00016119	C25H3.10		3.00667	2.23333	3.14	8.5	3.21333	2.89	2.17667	4.91	0.0285756	4.0624e-06	0.271779
C26E6.9b.1	WBGene00004782	set-2	Histone-lysine N-methyltransferase set-2	1.50333	2.27	2.84	3.64333	1.61333	3.06667	3.67	4.23667	0.018262	1.70017e-05	0.46847
C33C12.4.1	WBGene00016336	C33C12.4		1.19333	3.16	5.89667	6.33333	1.02333	2.16	2.19667	3.57333	0.000136438	1.94922e-05	0.141682
C35D10.14.1	WBGene00016450	clec-5	C-type LECtin	4.05333	1.71333	19.27	20.9933	1.36	1.15	2.74333	2.61667	2.45467e-05	0.000326916	0.113678
C37C3.13.2	WBGene00016505	ttr-33	TransThyretin-Related family domain	2.19333	2.2	6.00667	11.7867	2.66333	3.10667	4.11333	6.12	0.000960494	1.58449e-08	0.171612
C38D9.2.2	WBGene00008010	C38D9.2		0.623333	3.22667	5.46333	9.39	0.983333	5.11	8.04333	16.73	0.0144773	1.24199e-05	0.314155
C39E9.8a.1	WBGene00008032	C39E9.8		3.75667	6.62333	10.2067	12.47	5.32333	6.89667	7.62	5.9	0.00405565	7.18628e-05	0.2575
C40H1.5.1	WBGene00008040	ttr-5	Transthyretin-like protein 5	30.5467	38.18	73.77	107.073	64.51	119.22	120.643	152.213	1.07008e-08	2.4617e-08	0.364369
C41H7.9.1	WBGene00044370	C41H7.9		28.3667	29.42	46.0667	92.3233	28.7433	22.53	37.8167	49.1467	0.0117951	6.48801e-05	0.939938
C42D4.1.1	WBGene00016594	C42D4.1		170.617	460.277	1720.17	1870.42	153.51	415.847	682.147	629.413	6.45592e-05	4.03572e-06	0.127442
C42D4.1.2	WBGene00016594	C42D4.1		37.85	112.957	372.743	418.63	39.3067	100.24	151.47	155.03	0.000469389	3.03309e-05	0.204936
C49A9.8.1	WBGene00016762	ugt-24	UDP-glucuronosyltransferase	1.51333	2.09333	4.21667	5.34667	1.62	3.37667	5.88	6.74	1.41132e-05	9.05174e-11	0.101223
C49C8.2.1	WBGene00016766	C49C8.2		0.973333	1.08333	1.59	2.84	1.37333	1.82	2.25333	3.82	0.00830503	4.56165e-05	0.27835
C49G7.7.2	WBGene00016785	C49G7.7		1.69667	3.56	5.32	4.48	3.93	10.59	10.4533	7.90333	1.10426e-08	9.07512e-07	0.263333
C50F2.10.1	WBGene00000013	abf-2	Antibacterial factor-related peptide 2	4.19333	16.84	66.9733	96.4967	13.5033	58.2467	92.86	191.95	0.00642529	3.17933e-05	0.157463
C50F4.9.1	WBGene00008234	C50F4.9		1.4	4.4	8.14667	9.28333	3.09333	8.55	9.67333	7.85667	0.0248821	4.58116e-06	0.105397
C52E4.1.1	WBGene00000781	cpr-1	Gut-specific cysteine proteinase	6.47	3.39667	63.0533	69.2167	2.74333	1.44333	5.00667	4.09667	0.00155505	0.0144035	0.172235
C53B7.1.1	WBGene00004370	rig-3	Neuronal immunoglobulin domain-containing protein rig-3	0.93	1.47333	2.38	3.31	0.853333	1.37667	1.48667	1.86333	0.00534998	0.000148855	0.133209
C54D10.13.1	WBGene00045400	C54D10.13		2.01667	2.68667	4.86333	5.70667	2.16	4.39	5.66667	5.15333	0.0379774	1.34952e-07	0.268274
C54F6.14.2	WBGene00001500	ftn-1	Ferritin	0.636667	3.72	22.16	20.55	4.37333	17.7067	33.6533	54.4333	0.000192368	6.1631e-06	0.785172
C54F6.5.1	WBGene00016923	C54F6.5		1.33333	2.71667	10.5633	18.0933	2.55667	7.23667	15.2133	37.5867	0.0357674	0.000251659	0.176305
F07C3.9.1	WBGene00017197	F07C3.9		5.16	6.92667	16.1933	16.7533	5.01333	5.94333	6.29667	5.53	1.13676e-05	0.000146623	0.855005
F12A10.1.1	WBGene00017390	F12A10.1		12.5467	33.9	45	39.0667	33.1733	64.85	49.6867	36.3	0.00987079	0.00352952	0.555994
F14D7.10.1	WBGene00008797	F14D7.10		0.83	1.71333	5.14	9.26333	1.03	4.91333	7.92333	11.5033	0.00819849	7.98604e-07	0.186549
F14D7.7.1	WBGene00008794	F14D7.7		2.93333	2.79333	7.10667	11.39	3.81667	8.14	10.4433	14.5833	0.00088767	2.12944e-06	0.150141
F15B9.6.1	WBGene00008850	F15B9.6		0.356667	4.19333	14.5467	9.24667	12.0667	41.1467	45.8767	23.8533	7.54038e-06	0.0016447	0.117565
F28D1.3.1	WBGene00009213	thn-1	THaumatiN family	1.67667	2.36	13.48	32.47	0.696667	3.03	5.28333	8.95333	0.00121921	2.41118e-05	0.129803
F34H10.3.2	WBGene00009380	F34H10.3		1.43	1.6	2.46	3.90333	1.24	2.40333	3.38667	4.74	0.014004	6.25601e-07	0.102221
F35E12.5.1	WBGene00009429	irg-5	Infection Response protein	2.93333	4.8	8.13333	8.11333	0.88	2.81333	6.41667	6.45	0.000412069	2.31198e-07	0.101956
F41E7.4.1	WBGene00009620	fip-5	Fungus-Induced Protein	9.70667	13.2167	56.7933	66.8533	6.22	7.23	10.75	12.6333	6.42146e-08	6.64023e-07	0.131708
F42A10.7.1	WBGene00018343	F42A10.7		13.14	14.8033	126.677	111.047	2.24	4.16333	12.2733	19.9	5.25265e-05	0.000402379	0.372994
F46C3.6.1	WBGene00045253	F46C3.6		2.03667	2.08	6.35667	15.2067	1.29333	1.32333	2.79	5.48667	3.66076e-08	1.03235e-10	0.629879
F48C1.9.1	WBGene00018601	F48C1.9		4.67333	25.4	134.643	189.203	13.19	42.2633	42.8167	39.7233	2.19035e-06	1.3364e-07	0.246868
F48D6.4a.1	WBGene00018602	F48D6.4		3.58667	9.67667	16.1067	22.9167	10.76	19.1933	23.77	36.4967	9.30509e-06	1.76357e-07	0.116521
F49E11.10a.2	WBGene00009895	scl-2	SCP-Like extracellular protein	6.14333	5.04667	75.4633	224.187	0.6	5.86	28.7133	79.81	0.00695677	2.38032e-05	0.282627
F52F12.7a.1	WBGene00009940	strl-1	Steroidogenic acute regulatory-like protein 1	5.84333	6.75667	10.7733	14.1867	5.99	4.72	7.10667	8.86	0.00565404	0.000583934	0.167085
F53A9.7.1	WBGene00018730	F53A9.7		2.31	3.42667	9.91667	28.91	2.66	5.45333	8.09333	14.5933	0.00695021	2.1913e-08	0.115953
F53B6.9.1	WBGene00009964	fip-6	Fungus-Induced Protein	10.5367	19.66	61.8667	46.26	23.24	23.8333	29.4	22.4467	0.00879242	8.47033e-05	0.504743
F54B11.3a.1	WBGene00006816	unc-84	Nuclear migration and anchoring protein unc-84	1.23	2.88667	3.68333	5.86	1.78	4.22667	7.22	7.75	0.00765991	0.000103392	0.200329
F54F3.3.1	WBGene00010062	lipl-1	Lipase	0.453333	1.72667	13.9567	10.3467	8.26	20.4467	24.8	16.36	0.000787158	0.0078068	0.287233
F54F7.3.1	WBGene00010065	F54F7.3		23.6167	24.6733	44.1333	60.6433	29.5233	55.4067	80.74	132.47	0.000157424	3.72145e-05	0.145492
F56D1.5.1	WBGene00000969	dhs-5	Uncharacterized oxidoreductase dhs-5	2.12333	3.27667	6.53333	7.87	2.53333	3.52333	4.29333	3.56333	0.000808158	1.46179e-05	0.423433
F56D6.9.1	WBGene00044471	F56D6.9		2.73333	62.67	115.997	39.4967	112.843	203.727	110.393	52.53	0.00501609	0.0177495	0.71873
H05C05.4.1	WBGene00194747	H05C05.4		1.1	1.51	2.06667	2.50667	0.88	1.22	1.52	1.62667	0.000327146	1.71453e-05	0.137001
H12I13.6.1	WBGene00019194	H12I13.6		1.07333	5.01333	6.81333	9.17667	0.47	2.57333	5.49667	7.92333	0.0286593	1.24478e-06	0.507991
H42K12.1a.1	WBGene00003965	pdk-1	3-phosphoinositide-dependent protein kinase 1	1.32667	1.86667	2.37333	3.44667	1.58	2.66667	2.90333	3.69333	0.023067	8.87784e-06	0.373246
K02F3.4.1	WBGene00019327	zip-2	BZIP transcription factor family	16.1333	22.0267	34.6667	42.9533	19.7833	31.1667	37.77	43.45	0.0219793	1.26642e-07	0.121413
K03H1.3.1	WBGene00010538	ttr-3	Transthyretin-like protein 3	1.15667	0.946667	2.25	4.18333	2.01667	1.63333	2.51667	5.50333	0.0439153	2.01122e-05	0.351206
K07C11.3.1	WBGene00019476	timp-1	Tissue Inhibitor of MetalloProtease	22.8467	30.15	62.99	70.3367	24.9567	36.5267	43.3367	48.5	0.0023	4.76735e-08	0.252209
K09A9.8.1	WBGene00194849	K09A9.8		1.37	1.24667	4.5	10.3667	1.67667	3.69333	7.55	15.91	9.59929e-05	1.07313e-09	0.16013
K09C4.1b.1	WBGene00019547	K09C4.1		1.24	1.21667	1.95333	5.89667	0.91	1.63	1.84333	2.57	0.0148742	1.36487e-05	0.107509
K11D12.5.1	WBGene00019645	swt-7	Sugar transporter SWEET	12.85	17.85	51.31	43.7133	11.6767	20.5433	29.65	32.07	0.00492668	1.13317e-06	0.595969
K11G12.1a.1	WBGene00003530	nas-11	Zinc metalloproteinase nas-11	17.3633	22.4867	54.7967	74.8433	13.0233	17.7567	20.4467	22.6967	4.9416e-07	1.52235e-06	0.255474
K11G9.6.1	WBGene00003473	mtl-1	Metallothionein-1	1.52667	15.69	56.2467	68.9867	14.4533	161.487	520.03	930.79	6.58939e-10	6.61057e-09	0.273097
M116.4.1	WBGene00019791	sdz-25	SKN-1 Dependent Zygotic transcript	2.55	3.86333	5.86	6.71333	2.76333	6.11	14.55	13.3667	0.0029753	0.00129954	0.12142
M7.8.1	WBGene00010884	M7.8		1.33333	1.50667	2.83	4.38667	1.7	2.26	2.12	2.38667	0.00433281	1.18781e-07	0.202377
R05A10.2.1	WBGene00011019	R05A10.2		2.88667	4.08667	6	9.21333	2.25667	3.84	4.94667	6.15667	0.00458914	9.27577e-07	0.695273
R09B5.9.1	WBGene00000558	cnc-4	CaeNaCin (Caenorhabditis bacteriocin)	1.91333	20.06	77.55	101.113	2.68	11.8933	26.4933	32.36	2.01723e-06	6.26921e-08	0.382231
R09D1.10.1	WBGene00011166	chil-22	CHItinase-Like	1.19333	0.973333	2.33	3.20333	0.86	1.79667	1.37333	1.54333	0.00183143	4.88549e-05	0.203883
T05E12.3.1	WBGene00011486	T05E12.3		4.29333	8	59.9367	180.22	1.38333	4.13	9.46333	17.95	6.73797e-08	1.16846e-08	0.216805
T07C4.4.1	WBGene00004986	spp-1	SaPosin-like Protein family	52.2833	59.4633	194.66	227.27	65.5667	57.52	75.6433	102.103	0.00549862	0.00125599	0.136841
T08A9.11b.1	WBGene00020339	ttr-59	TransThyretin-Related family domain	8.90667	9.98667	19.9	23.09	7.58	9.32667	12.27	13.2933	2.56283e-05	6.08745e-07	0.132858
T08A9.2.1	WBGene00020335	ttr-30	TransThyretin-Related family domain	4.50667	6.46333	19.91	26.6833	4.76667	7.24	8.91	12.27	1.00368e-06	3.11636e-09	0.214806
T12G3.1a.2	WBGene00011737	sqst-1	SeQueSTosome related	4.87	11.1833	21.7767	32	6.45	21.65	25.1767	39.4233	0.0205569	1.29439e-06	0.237027
T16G1.5.1	WBGene00011799	T16G1.5		1.04333	4.22333	17.3733	7.81	1.43667	16.9933	28.2067	13	0.00711646	0.000138796	0.860677
T19C4.5a.1	WBGene00011839	T19C4.5		1.27667	1.20667	1.49333	3.86	1.08	1.30333	1.36333	1.78	0.00603934	3.59052e-05	0.368003
T19E7.6.1	WBGene00044500	T19E7.6		2.31667	2.84333	5.08333	9.77333	3.68333	7.15667	7.07	14.1567	0.00112169	4.18476e-06	0.101559
T20D4.10.1	WBGene00020616	T20D4.10		1.10333	3.34667	8.59	11.07	0.22	2.24333	5.23333	9.36	0.0458345	3.54564e-06	0.519243
T20D4.11.1	WBGene00020617	T20D4.11		1.97	3.52	6.75	7.81333	0.646667	2.49333	4.08667	5.88333	0.0017954	2.44184e-06	0.108262
T26H5.14.1	WBGene00235133	T26H5.14		1.95667	4.85667	10.6167	13.4	4.18333	11.06	17.2133	22.3233	0.000689059	1.37089e-05	0.88071
T28A11.2.1	WBGene00020869	T28A11.2		15.6033	33.91	53.96	75.4233	9.24333	29.3367	36.1033	46.36	0.000151796	6.69343e-08	0.121075
W05B10.4.1	WBGene00012279	W05B10.4		1.11667	1.50333	2.3	2.93667	1.29333	1.62333	2.85	3.81	0.0139142	3.27097e-07	0.119449
W08D2.4a.1	WBGene00001395	fat-3	Delta(6)-fatty-acid desaturase fat-3	26.92	31.37	73.77	84.4133	17.2567	32.5233	39.0567	46.4133	0.00610901	0.000730365	0.454224
W08D2.4b.2	WBGene00001395	fat-3	Delta(6)-fatty-acid desaturase fat-3	13.27	16.59	41.81	49.6667	9.12333	16.01	21.0233	26.6367	0.00136178	5.77318e-05	0.52083
Y34B4A.5.1	WBGene00021321	Y34B4A.5		5.83667	8.63333	16.66	15.0333	5.22667	12.05	10.39	7.04667	0.00876035	0.000284601	0.346743
Y37E11AR.2.1	WBGene00021369	siah-1	E3 ubiquitin-protein ligase siah-1	2.84	3.94667	6.38667	21.7133	3.11333	4.75333	6.20667	8.99667	0.0145177	3.81071e-06	0.290601
Y37E11B.7b.1	WBGene00021379	Y37E11B.7		1.48667	2.65667	4.40333	4.85333	4.88333	5.85667	5.79333	6.65333	0.00121483	0.0493418	0.51662
Y47D3A.2.1	WBGene00012923	fbxa-128	F-box A protein	2.11333	2.94	7.58333	6.47	2.03	6.19333	9.48667	6.75333	0.0470572	2.27829e-05	0.605408
Y48E1B.9b.2	WBGene00013008	clec-146	C-type LECtin	2.71667	4.23667	14.1733	33.5667	2.70333	4.37333	7.29333	13.2767	0.00522256	1.81234e-05	0.18222
Y50E8A.16.1	WBGene00001817	haf-7	HAlF transporter (PGP related)	2.78333	4.26333	5.53333	6.63667	2.81667	6.04	7.26333	8.25667	0.000506602	1.21203e-07	0.487428
Y51A2D.11.1	WBGene00013079	ttr-26	TransThyretin-Related family domain	5.46333	19.3667	67.2867	68.9433	22.8533	62.8433	87.6433	92.5767	1.20776e-05	2.12417e-08	0.208401
Y54G2A.7.1	WBGene00043702	Y54G2A.7		3.17333	7.83	15.5067	15.68	4.5	8.18667	6.34667	5.78	7.49673e-06	4.00892e-06	0.904949
Y57G7A.1.2	WBGene00021965	Y57G7A.1		3.95	8.74333	20.1867	16.2	7.93	21.51	21.5367	17.37	0.000848406	2.10769e-06	0.219728
Y58A7A.4.1	WBGene00021978	Y58A7A.4		1.95	11.2133	37.2233	31.7067	1.67333	12.9333	25.46	26.0833	0.0473618	3.54206e-08	0.191715
Y58A7A.5.1	WBGene00021979	Y58A7A.5		14.0833	49.57	119.433	93.46	12.5067	50.1267	82.8167	70.73	0.0452146	1.75909e-06	0.589395
Y62H9A.5.1	WBGene00013393	Y62H9A.5		461.07	725.83	1131.59	1171.83	416.557	751.883	612.017	453.99	1.8367e-05	0.0001153	0.161169
Y62H9A.6.1	WBGene00013394	ule-5	Uterine Lumin Expressed/locailized	411.467	598.423	934.62	1016.05	343.777	571.067	484.4	351.593	2.36726e-05	0.00110755	0.140678
Y68A4A.13.1	WBGene00044212	Y68A4A.13		0.486667	2.55667	24.2867	42.1367	7.86	11.7733	42.4167	76.4667	0.00727336	1.47016e-05	0.48124
Y73F4A.3.1	WBGene00013516	Y73F4A.3		0.93	2.15333	3.96333	4.42	2.65667	7.31667	10.7433	13.73	9.1888e-10	2.26479e-08	0.583251
ZC239.22.1	WBGene00194717	ZC239.22		1.71667	3.26667	16.0867	37.8567	0.386667	2.43333	3.01333	3.89333	2.46063e-12	1.46769e-12	0.427886
ZK1073.1.2	WBGene00014213	ZK1073.1		0.916667	1.46	2.15	2.72667	1.26	2.78667	3.23333	3.37	0.00978971	0.00137772	0.277221
ZK1251.2a.1	WBGene00002090	ins-7	Probable insulin-like peptide beta-type 4	2.81333	6.21333	35.3733	111.487	1.16333	2.88	3.09333	2.42	2.24254e-09	2.89376e-09	0.703679
ZK593.2a.1	WBGene00014002	ZK593.2		2.40667	2.03	4.92	7.81667	2.19	3.10333	5.23333	10.6433	0.0178878	7.69764e-09	0.182775
ZK970.7.1	WBGene00014173	ZK970.7		2.48	13.0167	112.5	124.327	1.29667	7.47333	18.1067	36.52	5.46277e-07	8.2331e-08	0.462609

## Sheet: physiological_temporal_shift_dn
Supplemental Table S1. Age-dependently regulated transcripts associated with physiological or chronological aging
Age-dependently downregulated transcripts associated with physiological aging: temporal shift
Transcript_ID: Detected transcript, Gene_ID and Gene_name: A gene contains the transcript, WT_d1 to daf-2_d11: Transcript levels in wild-type (WT) and daf-2 mutant animals at different ages
p_genotype: Significance of genotypes on transcript levels, p_age: Significance of ages on transcript levels, p_interaction: Significance of the interaction between genotypes and ages on transcript levels
Transcript_ID	Gene_ID	Gene_name	Description	WT_d1	WT_d4	WT_d7	WT_d11	daf-2_d1	daf-2_d4	daf-2_d7	daf-2_d11	p_genotype	p_age	p_interaction
B0024.4.1	WBGene00007097	B0024.4		12.1533	8.13	2.98	3.28333	19.1	29.6167	2.75667	0.616667	0.0389889	0.00107432	0.123878
B0310.5a.1	WBGene00015141	ugt-46	Putative UDP-glucuronosyltransferase ugt-46	10.81	5.71333	3.66	2.06667	6.55	5.01	2.78	2.28333	1.73504e-05	3.11478e-11	0.223251
C01H6.4.1	WBGene00007254	C01H6.4	Flavin-containing monooxygenase	3.61667	2.01333	2.20667	1.77333	3.15333	2.80333	2.62667	2.94	0.00641984	0.000556534	0.570978
C06H2.7a.1	WBGene00007391	C06H2.7		11.5867	9.85333	8.41	6.20667	10.3367	8.45333	5.80667	4.68667	0.0322865	0.000481025	0.499123
C08F11.8.2	WBGene00007455	ugt-22	UDP-glucuronosyltransferase	17.6667	12.1667	13.17	6.33667	7.91	8.35	5.77667	3.25667	2.90376e-07	6.06272e-06	0.126332
C10C5.3.1	WBGene00007507	C10C5.3	Aminoacylase	6.59667	1.55333	0.976667	1.78333	2.46333	1.69	0.966667	1.6	0.00553717	7.76975e-06	0.874762
C11E4.7a.1	WBGene00007521	C11E4.7		7.61	3.33333	3.26	1.79667	6.53667	3.07	1.61667	1.26333	0.000317635	2.66472e-11	0.145329
C12D8.5.1	WBGene00007536	daf-36	Cholesterol 7-desaturase	4.03333	3.36	3.28333	1.14	3.32	3.38667	1.53667	0.46	0.00101928	1.43793e-07	0.176551
C15C8.3a.1	WBGene00007605	hrg-7	Heme Responsive protein	13.8167	8.25333	11.5133	4.79	32.7933	20.49	18.3867	10.29	2.3115e-05	0.000204652	0.402694
C15H9.9.1	WBGene00015803	C15H9.9		35.6867	18.5267	17.32	15.0567	27.7333	19.22	13.8233	15.0633	0.0312551	1.27219e-07	0.529745
C17H12.8.1	WBGene00015933	C17H12.8		133.95	101.287	67.0767	19.4133	182.82	257.043	114.09	25.52	9.83635e-05	9.16404e-07	0.566722
C25F9.14a.1	WBGene00045461	C25F9.14		3.48333	2.20667	1.95333	1.73667	5.52333	3.40333	2.25667	2.82667	0.00263317	0.000384607	0.241325
C29E4.7.1	WBGene00016204	gsto-1	Glutathione transferase omega-1	3.72667	2.53333	2.87667	1.54	7.39667	5.90667	4.76	3.19	1.40722e-05	0.000716105	0.191935
C29F3.7a.1	WBGene00007807	C29F3.7		7.27333	3.69	1.88667	2.10667	5.36667	2.22667	1.05333	0.973333	0.00492308	1.54167e-06	0.716437
C29F7.3.1	WBGene00007812	C29F7.3	UMP-CMP kinase 1	16.8533	8.84333	8.84	8.63667	11.4667	8.05333	6.26	5.33333	0.00012449	1.32334e-06	0.708957
C34F6.2.1	WBGene00000751	col-178	COLlagen	1466.88	245.16	99.7467	46.9233	1052.02	173.343	74.97	51.6433	0.0108739	2.19805e-11	0.185201
C36B7.7.1	WBGene00001841	hen-1	HEN-1; HEsitatioN behavior	2.11	5	5.07667	0.913333	3.50667	12.1567	6.44	2.18333	0.000961648	1.4961e-05	0.898479
C37A2.6.1	WBGene00016492	C37A2.6	Electron transfer flavoprotein beta subunit lysine methyltransferase homolog	5.74667	4.47	3.85667	2.50333	4.49333	4.12	2.67333	2.77333	0.0268441	3.68592e-05	0.987656
C43H6.1.1	WBGene00016614	trpp-12	TRansport Protein Particle	4.12667	2.06333	2.15333	2.21333	3.42	2.08	1.75333	2.18333	0.0441919	1.78789e-07	0.315398
C45B2.1.1	WBGene00016658	C45B2.1		289.603	59.1833	83.7833	44.6867	179.733	38.3533	19.58	9.61667	0.0182126	2.35545e-05	0.154972
C46F2.1.1	WBGene00016714	C46F2.1		3.45667	2.54	3.03667	1.64667	2.12333	2.04333	1.23333	0.676667	0.000159885	0.00132191	0.263836
C46G7.2.1	WBGene00016722	C46G7.2		34.51	9.26333	9.44333	7.84667	30.06	8.01667	5.48667	6.64	0.0227437	1.54364e-10	0.333368
C47B2.2.2	WBGene00008131	C47B2.2		18.17	11.87	11.42	8.3	14.69	11.92	8.51333	7.42667	0.0173732	2.42929e-06	0.110339
C54E4.2a.1	WBGene00016918	test-1	Vertebrate proteoglycan TESTican homolog	11.6333	3.82	2.7	2.12	7.28667	2.32333	2.08	2.51	0.0273259	1.81528e-06	0.271391
D1053.1.1	WBGene00001790	gst-42	Probable maleylacetoacetate isomerase	11.19	7.97667	7.04	3.10667	14.7333	13.2433	8.84	4.94667	2.90842e-05	4.93905e-08	0.336884
D1054.18a.1	WBGene00077783	D1054.18		4.18333	1.73667	1.76	1.81	3.13	1.71	1.18	0.653333	0.0205116	6.24125e-05	0.306661
E01A2.7.1	WBGene00017089	poml-2	PON (Paraoxonase) and MEC-6 Like	3.19	1.26333	1.53333	1.55333	3.36	2.03333	2.19333	1.67667	0.0372597	4.68321e-05	0.316395
F01D4.2.1	WBGene00008486	ugt-44	UDP-GlucuronosylTransferase	31.3833	19.41	13.5633	4.39667	39.4667	32.5067	16.8667	7.98333	0.00224928	1.78172e-07	0.287463
F01D5.3.1	WBGene00008494	F01D5.3		6.53667	5.06667	4.41	1.20667	9.85333	14.73	12.3967	4.33667	0.000118059	0.0031737	0.145047
F08C6.1a.1	WBGene00000083	adt-2	A disintegrin and metalloproteinase with thrombospondin motifs adt-2	4.81667	2.37667	2.35333	2.22	3.66	2.12333	1.13	1.68333	0.00079695	5.58394e-07	0.927628
F10D2.9.1	WBGene00001399	fat-7	Delta(9)-fatty-acid desaturase fat-7	31.83	17.9767	21.91	3.29333	8.82667	2.79667	1.09333	0.446667	9.40411e-06	0.000601337	0.128457
F11H8.3.1	WBGene00000597	col-8	Cuticle collagen 8	1258.37	119.957	110.51	62.86	802.183	86.74	60.8	35.53	0.000389505	2.68859e-12	0.214347
F13B6.2.1	WBGene00017417	F13B6.2		3.28667	2.21333	1.65667	1.19	1.70667	1.49	0.88	0.86	1.48508e-05	7.29542e-06	0.678209
F15E11.14.1	WBGene00017500	pud-2.2	Protein Up-regulated in Daf-2(Gf)	209.9	156.127	128.453	33.1367	40.6667	150.023	79.76	5.08333	0.0290326	0.0148639	0.179842
F22E10.5a.1	WBGene00009057	cept-1	Choline/EthanolaminePhosphoTransferase	2.95333	2.02333	2.21333	1.50667	1.90667	1.95333	1.19667	1.33	0.000292753	0.000272935	0.163989
F25B4.8a.1	WBGene00017771	F25B4.8		9.17333	9.00333	10.84	4.05667	12.81	18.33	13.3333	8.45667	6.25784e-05	0.000240248	0.313751
F25H9.7a.1	WBGene00009139	F25H9.7		18.51	18.9033	15.6067	10.07	16.98	16.5833	11.1367	10.1133	0.0246009	2.1688e-05	0.463594
F26F12.1.1	WBGene00000713	col-140	COLlagen	2499.08	356.37	122.49	44.27	1731.67	282.12	121.32	96	0.0350765	1.57536e-10	0.231576
F28A10.6.1	WBGene00017874	acdh-9	Acyl CoA DeHydrogenase	26.1433	9.5	7.70333	8.11	16.6233	8.09667	5.84667	6.20333	0.0142952	3.50866e-06	0.209123
F28H7.3.1	WBGene00009237	F28H7.3		54.4	37.65	34.5467	9.20667	21.59	15.7567	6.45667	1.48333	8.72491e-09	7.15393e-08	0.879167
F33G12.7.1	WBGene00044666	F33G12.7		36.6267	35.4233	28.7633	18.11	33.7033	32.2667	22.3433	19.0633	0.0297876	2.97231e-07	0.169862
F35E12.8a.1	WBGene00009432	cld-9	Cub (CUB) Like Domain containing protein	2.96667	4.26333	3.14667	1.57	5.25333	17.7367	11.99	2.97333	0.00362948	0.0241996	0.247437
F35H10.4.1	WBGene00006914	vha-5	V-type proton ATPase subunit a	28.9767	11.07	10.2467	8.52667	22.3667	12.01	8.53	8.12667	0.042144	2.94738e-09	0.175699
F40D4.17.1	WBGene00194682	F40D4.17		3.81667	4.00667	2.83	2.11	5.10667	4.83667	2.8	3.43333	0.0148475	0.00106585	0.105248
F41H10.7.1	WBGene00001243	elo-5	Elongation of very long chain fatty acids protein 5	43.5267	23.83	31.4	15.0367	46.6233	41.54	38.48	30.8067	0.000345689	0.000107396	0.283968
F41H10.8.1	WBGene00001244	elo-6	Elongation of very long chain fatty acids protein 6	64.61	28.8967	31.8867	15.5833	58.87	61.4833	58.1	54.0267	7.01563e-06	0.000473779	0.331755
F46G10.1a.1	WBGene00009796	F46G10.1		61.03	72.21	56.7467	19.5667	98.8667	133.81	81.1267	42.14	0.000453407	0.000168369	0.170942
F47G4.7.1	WBGene00004875	smd-1	S-adenosylmethionine decarboxylase proenzyme S-adenosylmethionine decarboxylase alpha chain S-adenosylmethionine decarboxylase beta chain	7.05	6.73333	5.06	2.52	6.19	11.6433	9.43333	3.58	0.0129625	0.00113743	0.125784
F49E12.9a.1	WBGene00009902	drd-1	Dietary restriction down regulated	14.8767	6.74667	3.29333	1.65	7.75333	4.5	1.79667	1.53333	0.00122037	3.2107e-07	0.10004
F55C12.7.1	WBGene00018874	tag-234		4.17	4.32667	3.31	1.85667	7.97667	7.93333	6.11	4.4	0.000487709	0.0296287	0.234353
F56A4.2.1	WBGene00018910	F56A4.2	C-type LECtin	130.19	75.9567	44.4367	10.2567	55.4533	54.0133	16.7067	2.76	0.000925791	1.08797e-05	0.218686
F56D6.2.1	WBGene00018971	clec-67	C-type LECtin	15.18	30.34	20.2767	5.1	27.2167	53.52	20.9033	3.31333	0.01543	6.88664e-06	0.187623
F59D8.1.1	WBGene00006927	vit-3	Vitellogenin-3	188.033	113.22	31.37	4.66	127.077	44.8333	8.33667	1.35667	0.00799574	2.03337e-06	0.710566
F59D8.2.1	WBGene00006928	vit-4	Vitellogenin-4	155.86	118.147	32.49	4.70667	113.267	64.9367	13.0333	2.07	0.010497	6.43139e-07	0.866828
H12C20.3a.1	WBGene00003658	nhr-68	Nuclear Hormone Receptor family	12.78	7.98	7.21667	5.77	13.7433	13.7667	10.7267	9.00667	0.000331586	0.000299743	0.543184
H20E11.1a.1	WBGene00019213	H20E11.1		5.18333	3.19333	3.24333	2.36667	5.66667	5.78333	3.43333	2.15333	0.0143485	6.33995e-06	0.506206
H23N18.1.1	WBGene00019232	ugt-13	UDP-GlucuronosylTransferase	7.59	3.76667	2.82	2.76	8.94667	5.96	4.83333	3.32	0.0449019	0.000566259	0.357768
K02D7.3b.1	WBGene00000675	col-101	COLlagen	359.147	98.7067	44.5133	21.3867	306.39	67.1833	29.4767	19.6467	0.0160214	2.26827e-12	0.832165
K02F3.9.1	WBGene00019332	K02F3.9		33.0733	15.6533	13.7667	10.0433	26.0567	13.0367	9.20333	9.74333	0.000482206	2.24242e-10	0.18234
K07D8.1.1	WBGene00003497	mup-4	Transmembrane matrix receptor MUP-4	10.5567	4.71	4.58	5.08333	8.60667	4.47	4.02333	3.85	0.0364579	8.35623e-07	0.440055
K08F8.4b.1	WBGene00000240	pah-1	Phenylalanine-4-hydroxylase	27.46	16.73	13.7467	12.4633	26.4833	14.4933	10.9367	10.1633	0.0490846	5.26376e-08	0.458625
K09E2.3.1	WBGene00019572	K09E2.3		11.31	5.73333	5.2	6.29333	7.71667	5.66667	4.50333	5.04	0.0492849	0.000768733	0.351007
K09F5.2.1	WBGene00006925	vit-1	Vitellogenin-1	42.0167	15.0167	4.11667	2.47	18.2933	7.51	3.13	1.47333	0.00316035	2.0929e-06	0.615119
K10C2.7.1	WBGene00019622	K10C2.7		6.11667	2.70333	2.31	2.67667	9.21667	5.06667	4.1	3.97667	0.00204493	0.000170131	0.323665
M18.2.1	WBGene00010888	dlc-2	Probable dynein light chain 2, cytoplasmic	15.8767	6.73667	8.76667	8.42333	14.0367	7.31667	6.07	5.76	0.0219181	6.87669e-07	0.82776
MTCE.11.1	WBGene00010959	nduo-1		254.497	139.417	138.927	143.323	257.473	166.18	170.32	217.847	0.0352526	0.000552382	0.180108
R04B5.9.1	WBGene00011006	ugt-47	Putative UDP-glucuronosyltransferase ugt-47	7.56	3.96667	2.50667	1.74	5.83	4.40667	1.88	1.20667	0.038832	6.75415e-09	0.153356
R07E3.4.1	WBGene00011105	R07E3.4		10.27	8.34	6.99333	4.23667	9.93	11.6967	8.15	5.43333	0.0183392	7.7772e-06	0.418604
R07G3.2.1	WBGene00019939	lips-17	LIPaSe related	3.27333	1.09333	1.92667	1.32667	4.53333	2.39667	2.68333	3.13667	0.00121522	0.00162334	0.643879
R11D1.3.1	WBGene00011244	R11D1.3		7.45667	4.29667	2.73333	1.86	7.04333	6.56	3.99667	4.91	0.0300545	0.00179016	0.334925
T01B10.1.1	WBGene00001693	grd-4	GRounDhog (Hedgehog-like family)	3.02667	2.08667	1.75667	0.54	6.24667	5.59333	3.99	1.35	2.80546e-06	8.81573e-06	0.297633
T02E1.5a.2	WBGene00000967	dhs-3		13.7633	10.4433	12.2767	6.91	8.73333	12.0867	8.22	5.31	0.0424577	0.0082674	0.364531
T05B11.4.1	WBGene00020247	T05B11.4		6.06	3.19	3.62667	2.75333	3.12	2	1.72667	1.59667	8.15786e-07	6.79125e-06	0.733715
T09A5.2a.1	WBGene00002216	klp-3	Kinesin-like protein klp-3	3.77	1.37667	1.38333	1.47	2.54333	1.28	1	1.14	0.00410453	3.93851e-07	0.180154
T09F5.9.1	WBGene00011668	clec-47	C-type LECtin	101.73	11.2133	5.52	1.19667	21.6433	4.41667	1.39333	0.89	0.00315914	2.28454e-05	0.329592
T10B11.1.1	WBGene00020397	pcbd-1	Putative pterin-4-alpha-carbinolamine dehydratase	20.9433	11.2	11.1167	9.41	19.8933	15.16	13.27	24.6633	0.00191965	0.00238144	0.346147
T10E9.14.1	WBGene00271694	T10E9.14		8.80333	8.34333	6.65333	4.59333	6.96667	7.82667	4.83333	4.66667	0.016782	2.63478e-05	0.644715
T12G3.5.2	WBGene00011740	mrpl-51	39S ribosomal protein L51, mitochondrial	62.1267	52.1167	45.3667	33.8567	53.8533	48.7267	33.0467	31.0567	0.0153293	1.43875e-05	0.188398
T15B7.1.1	WBGene00020516	T15B7.1		18.3833	5.51667	4.72	3.01333	6.20667	5.67	4.29667	3.46333	0.0246746	0.000455046	0.141199
T15B7.3.1	WBGene00000716	col-143	COLlagen	923.407	299.127	205.06	161.83	833.043	211.363	123.11	121.147	0.0290018	2.10847e-10	0.187359
T19H12.10.1	WBGene00020593	ugt-11	UDP-GlucuronosylTransferase	2.33	1.59	1.30333	0.956667	2.53	2.26333	1.86333	1.68333	0.00690794	0.00253325	0.528179
T22E7.1a.1	WBGene00020693	lron-8	ELRR (Extracellular Leucine-Rich Repeat) ONly	3.46	1.62	1.7	1.73	2.43	1.58667	1.16667	1.27667	0.00241506	4.57868e-06	0.180284
T24C12.3.1	WBGene00020765	T24C12.3		3.28667	1.86667	1.86667	1.65333	3.09667	2.70333	2.36667	2.25	0.0056464	5.68566e-05	0.346805
W03G11.1b.1	WBGene00000754	col-181	COLlagen	984.853	354.52	264.87	199.18	664.307	264.76	165.36	142.693	0.000202782	4.85296e-10	0.17202
W10D9.5a.1	WBGene00021133	tomm-22	Mitochondrial import receptor subunit TOM22 homolog	88.2067	60.5933	49.99	39.6367	76.76	53.59	36.27	40.68	0.0287843	7.10109e-07	0.107532
W10G6.3.1	WBGene00003485	mua-6	Intermediate filament protein ifa-2	15.09	5.73333	6.23667	3.83333	11.9767	6.03667	4.13667	2.68	0.0350305	1.23208e-07	0.123847
Y105C5B.15a.1	WBGene00013654	Y105C5B.15	Purple acid phosphatase	17.95	27.3267	22.7533	7.62667	25.1967	56.63	33.56	13.6467	0.00131583	0.000102357	0.189948
Y105E8A.4.1	WBGene00001156	ech-7	Enoyl-CoA Hydratase	33.3367	27.1933	19.5233	7.58	40.9	47.21	33.7367	27.66	2.30004e-05	0.000152143	0.586461
Y17G7B.8.1	WBGene00012462	Y17G7B.8		12.1233	10.95	6.96	3.34667	17.22	14.87	7.36333	3.36333	0.0376934	5.85721e-06	0.272089
Y19D10A.9.1	WBGene00021224	clec-209	C-type LECtin	130.19	75.9567	44.4367	10.2567	55.4533	54.0133	16.7067	2.76	0.000925791	1.08797e-05	0.218686
Y19D10B.7.1	WBGene00021236	pud-1.2	Protein Up-regulated in Daf-2(Gf)	173.743	179.067	93.2267	52.03	34.1833	119.353	69.6867	17.25	0.00342221	0.00472862	0.187881
Y22F5A.5.1	WBGene00003091	lys-2	Lysozyme-like protein 2	211.91	339.47	232.87	28.0933	407.747	501.923	298.557	65.7567	0.00441516	1.80102e-05	0.293995
Y38H6C.1a.2	WBGene00012615	dct-16	DAF-16/FOXO Controlled, germline Tumor affecting	968.763	603.967	436.24	206.847	1394.28	960.92	548.47	280.31	0.000162643	9.40459e-09	0.809917
Y39A1A.21a.1	WBGene00012658	Y39A1A.21		15.45	9.72	6.59667	5.16333	11.3567	8.48	5.23667	5	0.0132952	4.8637e-07	0.269123
Y45G12C.2a.1	WBGene00001758	gst-10	Glutathione S-transferase P 10	45.4133	30.62	29.87	10.47	58.43	49.57	48.8233	21.4967	0.0028183	0.000321741	0.740134
Y47G6A.33.1	WBGene00045399	Y47G6A.33		78.5533	31.5367	16.05	8.85333	51.21	23.0933	8.85	5.91333	0.0100493	1.85187e-07	0.899216
Y48G8AL.14.1	WBGene00000165	aps-3	AdaPtin, Small chain (Clathrin associated complex)	36.9533	26.1967	21.5933	15.6067	29.74	23.1567	15.3033	15.1867	0.0113951	2.56993e-06	0.408492
Y50D4B.4a.1	WBGene00021743	Y50D4B.4		16.9	10.24	6.51667	3.62333	15	8.70333	5.21	2.99667	0.034417	1.93008e-09	0.10708
Y51F10.7.1	WBGene00021768	Y51F10.7		97.88	101.43	58.1067	12.4133	148.53	223.193	127.943	31.79	0.000215623	2.43855e-05	0.222999
Y55B1AR.1.1	WBGene00002269	lec-6	Galectin	148.243	132.44	176.593	64.2433	209.07	234.42	139.833	47.9533	0.0406639	8.69889e-06	0.106121
Y66A7A.6.1	WBGene00001633	gly-8	Probable N-acetylgalactosaminyltransferase 8	8.66	4.36667	4.30333	3.75667	4.10667	3.56	2.92	2.97667	0.000344245	0.000362724	0.118758
Y66D12A.22.3	WBGene00006573	tin-10	Mitochondrial import inner membrane translocase subunit Tim10	63.6	46.5633	42.0133	34.8	50.9033	43.8033	32.96	35.6	0.0361643	0.000113992	0.251078
Y71H10B.1a.1	WBGene00022201	Y71H10B.1		7.2	5.59	2.07	2.66667	5.96333	3.33667	1.87667	1.64667	0.0219079	1.19344e-05	0.659463
Y71H2B.1.1	WBGene00022191	Y71H2B.1		6.68	2.91667	3.31667	3.49333	4.87	3.29	2.14	2.04	0.023088	0.000204658	0.414509
ZC334.10.1	WBGene00002112	ins-29	INSulin related	2.85	1.42667	1.35333	1.40667	6.59	3.09667	2.16	2.30667	1.85408e-06	6.07093e-07	0.582723
ZK1098.7.1	WBGene00014224	mrps-23	Probable 28S ribosomal protein S23, mitochondrial	26.2833	18.6433	12.5733	8.62667	16.01	13.74	9.01	6.09667	0.00412321	0.000109946	0.933901
ZK1098.7.2	WBGene00014224	mrps-23	Probable 28S ribosomal protein S23, mitochondrial	21.8333	12.6067	10.0133	7.66	17.01	11.0333	6.75	8.00667	0.0247386	1.26959e-06	0.676496
ZK1127.10.1	WBGene00022856	cth-2	Putative cystathionine gamma-lyase 2	43.86	25.5833	25.8	19.7867	34.6667	25.9633	20.8833	10.93	0.00231584	2.70442e-07	0.331127
ZK228.3.1	WBGene00013946	ZK228.3		10.3933	6.39333	5.59667	3.11333	6.73667	6.34	4.23333	2.38333	0.0140041	1.30701e-05	0.804175
ZK39.6.1	WBGene00013931	clec-97	C-type LECtin	32.3367	28.3633	22.46	13.6367	22.1467	21.4733	10.9867	8.63333	0.000348923	5.57835e-05	0.390676
ZK430.8.1	WBGene00022743	mlt-7	Peroxidase mlt-7 Peroxidase mlt-7 light chain Peroxidase mlt-7 heavy chain	3.73	1.92	1.48667	1.98667	2.66667	1.96	1.15	1.55667	0.0221128	1.69461e-05	0.516709
ZK637.13.1	WBGene00014030	glb-1	Globin-like protein	55.26	38.3733	31.37	17.7267	147.18	71.58	37.78	25.4367	0.000240137	8.78786e-06	0.404143

## Sheet: physiological_slope_change_up
Supplemental Table S1. Age-dependently regulated transcripts associated with physiological or chronological aging
Age-dependently upregulated transcripts associated with physiological aging: slope change
Transcript_ID: Detected transcript, Gene_ID and Gene_name: A gene contains the transcript, WT_d1 to daf-2_d11: Transcript levels in wild-type (WT) and daf-2 mutant animals at different ages
p_genotype: Significance of genotypes on transcript levels, p_age: Significance of ages on transcript levels, p_interaction: Significance of the interaction between genotypes and ages on transcript levels
Transcript_ID	Gene_ID	Gene_name	Description	WT_d1	WT_d4	WT_d7	WT_d11	daf-2_d1	daf-2_d4	daf-2_d7	daf-2_d11	p_genotype	p_age	p_interaction
B0001.6.1	WBGene00007091	eri-12	Enhanced RNAI (RNA interference)	6.29667	7.58	12.1	18.97	5.76333	9.53333	12.1567	19.63	0.555663	2.78417e-07	0.00190548
B0035.8.1	WBGene00001922	his-48	Probable histone H2B 4	511.033	705.37	1016.4	1375.22	528.927	849.087	1056.84	1231.76	0.670862	1.10141e-09	2.79465e-06
B0205.13.1	WBGene00044644	B0205.13		1.02	2.84333	4.93667	10.0467	1.21	3.32	6.02333	10.8233	0.19819	8.05371e-09	0.0237781
B0205.14.1	WBGene00044646	B0205.14		1.19667	5.92667	9.36333	12.86	1.18333	5.56	10.4367	12.53	0.92683	4.7276e-06	0.000541639
B0228.6.1	WBGene00015063	B0228.6		1.74667	2.22	3.28667	4.55	1.51667	2.55667	3.8	4.55333	0.620664	5.38365e-05	0.0183953
B0302.1a.1	WBGene00002207	sid-3	Tyrosine-protein kinase sid-3	0.966667	1.19333	1.38	2.45667	1.1	1.53	1.75333	2.09	0.352215	4.53371e-05	0.0236569
B0511.12a.1	WBGene00015237	B0511.12		1.64	2.34	3.07	4.22333	1.73333	2.69667	3.12	3.77333	0.938945	6.77838e-07	4.75812e-05
C01B10.6d.2	WBGene00015280	C01B10.6		1.75333	3.58333	7.95333	8.22667	1.99	10.1867	8.85	4.45	0.386425	0.00581627	0.0139442
C01B12.2.1	WBGene00015285	gmeb-1	GMEB (Glucocorticoid Modulatory Element Binding protein) transcriptional regulator homolog	1.5	1.59	2.39667	4.00333	1.42667	2.08667	2.45333	3.56	0.9551	3.81929e-07	0.0095887
C02F5.7b.1	WBGene00015350	fbxl-1	Uncharacterized F-box/LRR-repeat protein C02F5.7	4.11333	4.26	5.75333	10.53	2.38667	4.98	5.60667	9.30333	0.291317	3.47645e-06	0.000698114
C03G5.10.1	WBGene00044338	nspc-3	Nematode Specific Peptide family, group C	1.56667	3.16	5.87333	6.71	2.00333	3.12667	4.06	5.7	0.200776	3.54406e-05	0.0146572
C04A11.5.1	WBGene00007288	C04A11.5		1.09667	1.98333	4.25667	6.91	1.57667	3.01333	3.92667	6.02667	0.724327	3.95498e-10	3.55813e-05
C04H5.2.1	WBGene00007313	clec-147	C-type LECtin	3.61667	3.87	6.83333	11.7	3.11667	3.49	4.4	10.5933	0.171153	1.40814e-05	0.00524498
C05A9.2.1	WBGene00007317	C05A9.2		0.863333	1.67	1.8	2.31	1.29333	2.10667	1.78333	2.13333	0.269996	0.000620298	0.000696917
C05B5.8.1	WBGene00007324	C05B5.8		6.73667	11.7733	20.6333	24.55	6.05667	13.57	17.02	21.0533	0.157658	8.54784e-08	0.00975487
C07A12.7c.1	WBGene00015561	C07A12.7		1.37667	1.84333	2.90333	4.42667	1.06333	3.1	3.58333	4.6	0.161836	2.09915e-05	0.00197444
C07H6.3.1	WBGene00015580	cls-1		1.58667	1.65	2.91667	4.19667	1.54667	1.97	2.7	3.43	0.52464	0.000139432	0.00131697
C08A9.10.1	WBGene00044773	C08A9.10		48.2867	90.6633	178.753	215.873	53.8067	115.163	149.153	179.81	0.361499	1.38063e-07	0.0300635
C09D4.5.2	WBGene00004431	rpl-19	60S ribosomal protein L19	17.96	54.5033	117.43	121.37	22.01	84.6033	128.883	117.6	0.201638	4.90268e-07	0.0209416
C09F5.1a.1	WBGene00015647	C09F5.1	BRICHOS domain-containing protein C09F5.1	1.99333	2.31333	2.88	4.92	1.72667	2.27667	2.86333	4.19333	0.335337	2.27753e-05	0.00861632
C13G3.3a.2	WBGene00007554	pptr-2	Serine/threonine protein phosphatase 2A regulatory subunit	2.19667	3.22667	3.23	5.56667	2.64	3.29333	3.81333	4.11667	0.84509	0.0142907	0.00869911
C14C6.2a.1	WBGene00015756	C14C6.2		2.41667	9.71	20.0167	19.8233	4.07333	13.34	14.2633	9.85333	0.204814	0.00105878	0.001763
C15F1.5b.1	WBGene00015796	C15F1.5		1.32	2.25333	3.47	4.33	1.31333	2.65	2.85667	4.51	0.960164	6.32813e-07	0.000272387
C17G1.5.1	WBGene00007652	C17G1.5		1.37	1.78667	2.84667	3.28667	1.38667	2.13	2.85333	3.45	0.475944	8.33795e-06	0.0023281
C17H12.11.2	WBGene00015936	C17H12.11		4.19333	7.3	16.8333	22.9267	4.99333	10.2567	12.6633	16.4733	0.115183	2.93564e-07	0.0113545
C18E3.3.1	WBGene00015972	C18E3.3		2.47	3.55	4.32333	5.79	2.51	4.14667	5.04333	6.30333	0.179121	2.2531e-05	0.0313568
C23H4.1.3	WBGene00000277	cab-1		1.13	1.68	2.93	3.41	1.99667	1.94667	2.65667	2.8	0.839889	0.00740113	0.0358561
C25B8.4a.1	WBGene00016088	clec-266	C-type LECtin	4.57667	13.5667	20.8033	20.96	9.09	23.25	26.1933	21.8733	0.20559	0.0373857	0.0146387
C25F6.2a.1	WBGene00001006	dlg-1	Disks large homolog 1	1.69	2.76667	3.36	5.82667	2.12333	3.84333	4.43333	5.03333	0.382417	0.00170166	0.0404132
C26C6.5a.1	WBGene00000938	dcp-66	Deacetylase Complex Protein	1.84	2.3	3.06	4.44333	1.42667	3.01	4.01667	4.41	0.225656	7.40733e-06	0.0159132
C27B7.1b.1	WBGene00005007	spr-2	Suppressor of presenilin-2	12.9867	16.75	23.7233	28.0467	13.1033	19.9167	18.4233	29.8967	0.976211	1.01877e-05	4.13352e-05
C27H6.4a.1	WBGene00007786	rmd-2	Regulator of Microtubule Dynamics	7.29333	9.39333	16.08	23.1167	8.49333	12.27	14.83	24.0333	0.542358	1.97975e-05	0.00252283
C28A5.3.1	WBGene00003590	nex-3	Annexin	9.95	10.32	19.3967	28.1367	9.41333	14.3067	17.58	22.6467	0.301572	2.88858e-08	0.000412444
C28A5.4a.1	WBGene00000463	ceh-43	Homeobox protein ceh-43	1.39333	2.37	4.06667	4.97667	2.27	3.15333	4.69	6.25667	0.136617	0.00149861	0.0327241
C28G1.4.1	WBGene00016189	C28G1.4		1.04667	1.60333	2.47667	2.76333	1.05333	1.91333	2.82333	3.41333	0.122521	1.98391e-05	0.00211574
C30H6.12b.1	WBGene00044238	C30H6.12		0.29	4.16	7.04	6.84	2.07667	5.53333	5.9	7.94667	0.299221	0.000154593	0.0172805
C31H1.6a.1	WBGene00016289	lntl-1	LIN-24 (Twenty-four) Like	1.91667	1.75	2.49	4.64667	1.57	2.73	2.84667	4.44	0.461406	1.32234e-05	0.00405655
C31H1.6b.1	WBGene00016289	lntl-1	LIN-24 (Twenty-four) Like	1.04333	1.46	3.01	4.86667	1.18667	1.21667	2.33	4.56	0.420503	6.22973e-06	0.023899
C32E8.7.1	WBGene00004368	ric-19	Resistance to inhibitors of cholinesterase protein 19	1.23667	1.40333	2.29333	3.82	1.28	1.93333	2.4	3.78333	0.421987	1.34015e-06	0.0188414
C32F10.4.1	WBGene00016332	C32F10.4		12.85	23.4067	48.38	52.26	14.62	34.3567	40.6767	64.7833	0.31667	1.87068e-05	0.000893821
C34C12.4.1	WBGene00007923	C34C12.4		1.92	3.43667	6.33333	8.39333	2.54667	4.43667	6.60667	9.56	0.295262	5.19543e-05	0.00701617
C34C12.4.2	WBGene00007923	C34C12.4		5.53	5.45667	9.55	12.7067	4.01667	9.14	9.43	9.08333	0.594793	0.000189828	0.000108912
C34C6.7b.1	WBGene00007919	cup-16		0.803333	1.61333	4.33333	13.1767	1.33667	3.22667	5.37667	8.89667	0.655083	5.63808e-08	0.0195727
C34G6.7a.1	WBGene00004109	stam-1	Signal transducing adapter molecule 1	9.91667	20.8233	27.61	31.79	13.7267	24.16	18.6433	25.85	0.368896	0.000449984	5.55541e-05
C35C5.3a.1	WBGene00007955	selt-1.1	Thioredoxin reductase-like selenoprotein T homolog selt-1.1	4.26	4.79333	8.86667	10.7667	3.72667	7.02333	7.89333	10.36	0.870907	7.9138e-07	0.02823
C36A4.11.2	WBGene00044167	C36A4.11		2.14	2.18667	3.11	5.33	0.963333	2.18	2.85333	5.50667	0.13968	1.08201e-08	0.0444903
C37A5.9.1	WBGene00004202	pry-1	Axin-like protein pry-1	1.39667	1.75	3.16333	4.85	1.22	1.84	2.58667	4.7	0.54654	1.51843e-05	0.00816836
C37H5.3a.1	WBGene00016507	abhd-5.2	Abhydrolase domain-containing protein abhd-5.2	1.95333	2.82	4.07667	4.78333	1.86667	3.06	3.96	5.30333	0.764813	0.00157858	0.0286088
C37H5.9b.1	WBGene00003528	nas-9	Zinc metalloproteinase nas-9	2.72333	2.79333	6.03333	7.45333	4.04	4.07333	4.06333	4.97	0.174885	4.8115e-05	0.000361988
C38C3.4b.1	WBGene00016513	C38C3.4		1.34667	1.17	1.73667	4.28	1.28333	1.71667	2.14	3.77	0.692818	2.8584e-06	0.00218669
C39F7.5.1	WBGene00016540	C39F7.5		1.63667	2.23667	4.20667	6.40667	1.51333	2.93667	3.89	6.78667	0.698775	2.90241e-06	0.000348309
C41H7.3.2	WBGene00016573	lido-12		9.15667	12.18	17.8067	26.27	9.82333	11.0667	13.5633	19.5733	0.104927	0.000249347	0.0183179
C42D8.1.2	WBGene00016599	C42D8.1		3.28667	6.38333	8.16	8.63667	5.22667	9.27667	6.80333	6.18667	0.742283	0.0172574	0.0454682
C42D8.8a.1	WBGene00000149	apl-1	Amyloid-beta-like protein	13.4233	15.4633	22.6633	38.0767	12.2	19.5767	21.75	28.7233	0.347053	1.58729e-05	0.0432125
C44B11.6.1	WBGene00016635	C44B11.6		4.09	4.12667	7.44333	10.3	3.46667	5.18333	8.05667	12.62	0.114492	1.22883e-07	0.00281723
C44B12.5.1	WBGene00016638	perm-4	PERMeable eggshell	44.1	84.43	131.833	193.497	53.0833	90.0267	108	142.24	0.131236	3.0758e-06	0.000310403
C44C1.2.1	WBGene00016642	chil-10	CHItinase-Like	6.81667	7.46333	13.1767	16.5033	7.28	11.03	11.8933	14.4667	0.83748	3.30684e-05	0.0364803
C45B11.3.1	WBGene00000981	dhs-18	DeHydrogenases, Short chain	2.79333	1.81667	4.76333	8.82333	2.57333	3.14	5.85333	4.93	0.307196	3.45623e-06	0.0178567
C46C2.5.1	WBGene00008113	C46C2.5		22.13	32.4167	44.7333	54.1433	22.2333	41.5067	45.7767	49.5367	0.616889	1.60279e-05	0.00543677
C48E7.10.1	WBGene00005000	spp-15	SaPosin-like Protein family	40.8	64.3867	120.743	158.13	45.3	82.4933	109.197	133.333	0.591332	7.45115e-08	0.0497654
C49G7.10a.1	WBGene00016788	C49G7.10		9.33	14.2967	22.1433	24.9567	11.86	19.3867	19.3533	19.7133	0.941454	0.000151531	0.00778458
C49G7.5.1	WBGene00016783	irg-2	Infection Response protein	3.69333	6.44	8.37	9.59667	3.91	8.18333	8.34667	11.4567	0.113267	7.06101e-06	0.00295987
C50B6.3a.1	WBGene00008219	C50B6.3		4.53	6.34	8.40667	9.71	3.83333	7.32333	8.24667	9.72667	0.944293	1.40722e-05	0.0012006
C50E10.4a.1	WBGene00004945	sop-2	Polycomb protein sop-2	1.63	2.01	3.69333	5.32667	1.84667	2.70667	3.22	5.42333	0.664352	3.73431e-06	0.00283241
C53C11.2.1	WBGene00016900	C53C11.2		3.54667	3.11667	6.53667	11.1167	3.91667	5.14667	6.27	13.9467	0.106332	1.62377e-06	0.0393889
CD4.2.1	WBGene00000795	crn-2	Cell death-related nuclease 2; Cell-death-Related Nuclease	10.5133	14.7433	30.94	39.1867	8.82333	20.8133	31.8367	36.61	0.730348	2.09362e-07	0.00495356
D1037.4.2	WBGene00004272	rab-8	RAB family; Rab8	2.65667	3.52	4.19667	6.44333	3.34	3.28667	3.45333	4.81333	0.206946	0.000807129	0.00197891
D1054.11.1	WBGene00008378	ule-3	Uterine Lumin Expressed/locailized	378.267	426.14	642.06	884.597	371.703	560.433	552.22	767.097	0.600569	4.85102e-06	0.000601958
D1086.1.1	WBGene00008388	D1086.1		7.72667	15.2167	26.5633	33.4733	10.4933	21.0267	24.6767	28.9367	0.692445	8.16112e-08	0.0289241
D2096.5.1	WBGene00017072	D2096.5		1.35667	3.01333	8.15333	19.21	1.75667	5.08333	9.27333	15.3333	0.899276	5.70351e-11	0.0171455
DC2.3a.1	WBGene00017080	lec-12	Galectin	2.58667	3.72	6.14667	6.60333	3.96333	4.55	5.07333	5.45	0.993311	0.0169637	0.0054356
DY3.6.1	WBGene00008439	mfb-1	MAFBx (F-box) protein homolog	0.856667	1.27667	1.82667	4.62	1.17667	1.8	2.80667	4.1	0.111351	3.58271e-08	0.0256649
E01G4.1a.1	WBGene00008444	tbc-14	TBC (Tre-2/Bub2/Cdc16) domain family	4.45667	4.78667	6.74333	11.4967	4.79	6.42667	8.20667	12.7233	0.199163	0.000129527	0.00731442
E04F6.8.1	WBGene00017127	E04F6.8		55.6467	122.893	253.093	288.54	60.3133	147.767	214.483	258.203	0.324812	9.71944e-10	0.000656395
F02G3.1a.1	WBGene00017184	ncam-1	NCAM (Neural cell adhesion molecule) homolog	1.15	2.45667	3.36	4.08667	1.27667	3.32333	3.94333	4.48333	0.37294	0.00699506	0.0491484
F07H5.13.1	WBGene00008563	F07H5.13		1.41667	3.22333	3.7	4.94	1.23333	3.93	5.02667	5.66667	0.243691	0.000768688	0.000520802
F08B12.4a.1	WBGene00008572	F08B12.4		13.35	37.9633	112.47	230.5	13.8367	58.6033	119.043	257.33	0.486972	3.32867e-06	0.00678723
F08B12.4b.1	WBGene00008572	F08B12.4		13.35	37.9633	112.47	230.5	13.8367	58.6033	119.043	257.33	0.486972	3.32867e-06	0.00678723
F08B12.4b.2	WBGene00008572	F08B12.4		21.6833	35.37	108.12	217.287	18.8067	64.3333	113.957	209.907	0.596479	4.36269e-08	0.000727822
F09F7.7a.1	WBGene00017304	nmad-1	DNA N6-methyl adenine demethylase	17.8633	23.38	42.9333	65.0333	16.8333	34.0967	44.1633	75.5	0.182092	7.71796e-07	0.00413404
F10E9.12.1	WBGene00017361	F10E9.12		1.74333	3.90333	11.9833	29.1333	2.88333	7.32333	11.6567	20.5533	0.450357	9.36832e-08	0.0280452
F11G11.5.1	WBGene00017385	F11G11.5		9.61	13.5633	19.4033	23.0067	9.73333	16.0567	17.0533	22.2033	0.906473	9.35871e-06	0.00458279
F13E9.15.1	WBGene00045208	F13E9.15		1.27	1.41	2.10333	7.28667	1.37667	2.79333	3.11	7.26667	0.125088	9.90179e-08	0.0231587
F13G11.3.1	WBGene00045038	ule-2	Uterine Lumin Expressed/locailized	116.433	173.607	324.11	428.193	106.147	219.747	276.907	354.57	0.10393	1.10071e-09	0.00110119
F13H10.6a.1	WBGene00008777	F13H10.6		13.6633	19.06	31.5467	38.7533	13.2633	24.2133	32.2167	38.79	0.431834	2.32937e-07	0.0221614
F15D4.5.1	WBGene00008862	F15D4.5		2.18667	7.57667	12.4767	16.5267	3.18667	11.6333	15.8967	20.5467	0.107008	0.000172212	0.00735296
F16H11.5.1	WBGene00003635	nhr-45	Nuclear Hormone Receptor family	1.73667	2.25333	3.16333	4.35333	1.72667	3.15667	3.86	4.44	0.146002	5.30519e-05	0.026141
F20D1.10.1	WBGene00008980	emre-1	Essential MCU regulator, mitochondrial	13.8933	17.18	27.5667	48.0267	15.9667	23.88	30.13	47.0133	0.199946	5.37039e-08	0.00411959
F20D1.2.1	WBGene00008974	tbc-1	TBC (Tre-2/Bub2/Cdc16) domain family	6.71667	10.0067	14.7933	19.7833	7.05667	11.5367	12.6867	16.6267	0.491599	8.89674e-05	0.00757683
F21D5.3c.2	WBGene00009008	F21D5.3		0.68	1.67333	4.87667	7.09667	1.85333	2.73667	3.94	6.30333	0.796528	6.45574e-06	0.0496646
F23F1.6.1	WBGene00017747	F23F1.6		2.31333	1.71333	3.41	6.52667	2.84667	2.87333	3.39	6.07	0.363344	1.60072e-06	0.0190622
F23H12.1.2	WBGene00004898	snb-2	SyNaptoBrevin related	11.75	13.2467	21.2233	31.0967	11.87	21.5	23.0867	29.1967	0.23412	1.66568e-05	0.0224345
F25E5.8a.1	WBGene00017789	F25E5.8		9.58	10.94	14.6633	24.56	10.59	9.88667	11.1067	20.7433	0.186603	2.86659e-05	0.0422543
F25H2.8.2	WBGene00006720	ubc-25	Ubiquitin-conjugating enzyme E2 25	16.36	22.7367	29.2933	37.4967	14.9367	24.4567	28.7633	34.09	0.447678	6.43682e-08	3.95624e-05
F26D10.9a.1	WBGene00000224	atgp-1	Amino acid Transporter GlycoProtein subunit	2.62	3.29667	5.76333	9.88	2.75	4.02	5.41667	9.20667	0.93815	1.31036e-06	0.000412832
F26D11.1.1	WBGene00017818	F26D11.1	Gluconokinase	6.33667	10.3633	14.6367	15.0533	6.72333	11.8733	12.2067	15.12	0.871117	3.81949e-06	3.06148e-06
F26D11.6.1	WBGene00017823	pals-34	Protein containing ALS2cr12 (ALS2CR12) signature	1.31333	1.28333	2.50333	4.13	1.34667	1.96	2.67	4.01333	0.331325	2.65576e-07	0.00405465
F26E4.7a.1	WBGene00009162	F26E4.7		1.32667	1.32333	1.94	3.29667	1.17667	1.47	2.03333	3.31667	0.865701	1.03067e-06	0.00668006
F28E10.2b.1	WBGene00017901	igeg-1	IG (Immunoglobulin), EGF and transmmembrane domain	1.55667	2.01333	3.31667	7.61333	1.54	2.63667	3.71333	7.22333	0.736817	1.11602e-06	0.0020084
F28F8.4.1	WBGene00009222	fbxa-95	F-box A protein	4.33333	7.69667	12.7633	15.39	4.20333	9.01	9.81333	15.83	0.716459	3.16494e-06	7.44982e-06
F32D1.11.1	WBGene00044530	F32D1.11		0.93	1.52	2.05667	2.77333	1.23333	1.77	1.54667	2.90667	0.808925	6.58262e-05	0.00288514
F35B12.3.1	WBGene00009383	F35B12.3		2.78667	3.27	5.49667	7.96667	3.35333	4.37667	5.25333	7.50333	0.620311	3.67278e-05	0.000877541
F35E12.2b.1	WBGene00009426	F35E12.2		1.11667	2.69333	3.51667	4.99333	0.92	2.97	4	5.79	0.35783	5.44245e-06	0.0240166
F40F4.2.2	WBGene00002254	lbp-2	Fatty acid-binding protein homolog 2	200.727	205.08	387.237	541.023	199.917	251.907	350.53	432.513	0.142077	1.20579e-08	0.0158367
F40F9.2.1	WBGene00006470	tag-120		7.09667	9.47	16.8433	22.3133	7.00333	15.51	18.2133	20.83	0.17468	5.58263e-07	0.0418871
F40F9.6b.2	WBGene00009583	aagr-3	Acid Alpha Glucosidase Relate	9.57	17.4533	26.48	28.27	14.11	17.4733	23.6167	34.83	0.545234	0.00490818	0.0264073
F41G4.8.1	WBGene00018311	F41G4.8		1.34	1.25667	3.53333	8.42	1.37333	2.27667	4.01333	7.55333	0.702717	9.63725e-08	0.00376352
F43C11.7.1	WBGene00018384	F43C11.7		4.42	3.79	10.8633	17.7033	4.65667	6.03333	8.55333	20.8033	0.399089	6.77869e-08	0.0143114
F43C9.2b.1	WBGene00018376	F43C9.2		3.53	2.63667	5.10333	12.7	2.27667	3.38333	3.88667	9.13667	0.110811	9.06551e-06	0.0275677
F44C8.3.1	WBGene00003617	nhr-18	Nuclear hormone receptor family member nhr-18	2.03	1.94333	3.18333	5.80667	1.78	2.87	3.46667	7.39	0.155418	7.23658e-06	0.0259664
F44E5.4.1	WBGene00009691	F44E5.4		1.93333	5.93	8.08	11.7567	3.07333	10.01	8.85333	11.0367	0.442405	0.0151147	0.00243569
F44E5.5.1	WBGene00009692	F44E5.5		3.87667	9.28	14.77	17.74	8.25333	16.2433	17.5467	16.79	0.161066	0.0132471	0.000688244
F44F4.3.1	WBGene00009702	F44F4.3		1.22	1.52667	2.62667	4.27333	0.883333	2.15	2.61667	4.14	0.834262	1.99659e-08	0.000876199
F46C8.3.1	WBGene00018485	F46C8.3		2.45	3.91	6.52333	6.90667	2.95	4.66333	6.82	7.04	0.514531	0.000724472	0.0194612
F47G3.4.1	WBGene00194641	F47G3.4		18.26	20.02	40.27	60.66	18.2833	29.59	37.6467	58.6067	0.567578	6.62009e-09	0.00134916
F47G4.2.2	WBGene00009823	gadr-6		4.77	13.4767	18.61	14.5233	4.41333	14.54	14.26	15.8633	0.628035	1.61586e-05	0.000240743
F52C9.8f.1	WBGene00004095	pqe-1	Putative RNA exonuclease pqe-1	5.99	9.20667	13.4333	14.7867	3.8	9.93333	11.44	14.4633	0.183256	4.93854e-07	0.0134545
F52E4.5.1	WBGene00018702	F52E4.5		4.29667	6.84333	12.6067	13.78	4.57667	8.55667	10.7	13.08	0.818473	5.73657e-07	0.0019914
F52H3.3.1	WBGene00009945	bath-38	BTB and MATH domain-containing protein 38	5.15333	5.64	8.75	16.7933	4.49	5.98	8.1	12.9233	0.115809	4.6809e-07	0.0110263
F52H3.7a.2	WBGene00002265	lec-2	Galectin	4.92	3.52	23.79	130.853	3.25667	4.48333	31.6433	88.8933	0.444762	2.10918e-05	0.0310463
F53A2.9.1	WBGene00009953	F53A2.9		7.40333	17.2233	22.24	20.4333	4.86	17.0033	17.5267	18.5233	0.223952	0.000328465	0.00586319
F53A9.9.1	WBGene00018732	F53A9.9		1.26333	1.14	2.25667	3.44667	1.36	1.67667	2.23333	3.39667	0.577775	8.88701e-05	0.0043275
F53H4.1.1	WBGene00000803	csb-1	CSB (Cockayne Syndrome B) homolog	3.33333	3.91667	5	7.70667	2.74667	4.27	4.98	7.41	0.728386	7.36864e-06	0.00274374
F54D1.6.2	WBGene00010047	F54D1.6		4.11333	5.34333	8.61	13	3.88	7.63333	8.94	11.86	0.603197	6.19564e-07	0.00476569
F54E7.7.1	WBGene00004321	rcan-1	Calcipressin-like protein	1.53667	2.16	3.51	5.83	1.76	3.10667	3.67333	6.5	0.131942	5.2412e-07	0.0109764
F55C12.1b.1	WBGene00018869	rfip-1	Rab-11 Family Interacting-Protein	1.29	1.57	1.98333	3.73333	1.17667	1.66	1.91333	2.63667	0.174125	7.04e-05	0.00303164
F55H2.1a.1	WBGene00004933	sod-4	Extracellular superoxide dismutase [Cu-Zn]	7.61333	8.24	14.3067	28.5667	8.31333	11.1733	14.1467	25.0067	0.983327	1.17912e-08	0.00891689
F56A6.1a.1	WBGene00018921	sago-2	Piwi-like protein	1.29333	2.18667	2.85667	3.62667	1.09333	2.49667	2.09667	3.28	0.315892	0.000121352	0.00101984
F56D2.5.1	WBGene00018966	F56D2.5	RBR-type E3 ubiquitin transferase	2.54	4.22	8.29	9.17667	2.74667	5.46	7.82667	9.17667	0.603823	3.14913e-07	0.00723387
F56E3.3a.1	WBGene00002217	klp-4	Kinesin-like protein	2.32667	3.03	5.27	7.71	2.44333	3.85667	5.54667	6.36	0.927345	9.48055e-07	0.0326373
F57A8.1.2	WBGene00010177	F57A8.1		0.943333	1.44667	1.91333	3.26667	1.38667	1.77667	2.6	2.97	0.335772	0.00187741	0.0333658
F57C12.4.1	WBGene00003408	mrp-2		2.66333	4.35667	6.75333	10.5233	2.41	5.6	7.21	9.56667	0.82438	1.03163e-06	0.0320824
F57C7.3a.1	WBGene00004749	sdn-1	Probable syndecan	3.09667	4.46	5.84667	7.37	3.44333	5.74333	6.46	7.68	0.121291	1.65718e-05	0.00468065
F59A7.12.1	WBGene00044520	F59A7.12		1.13333	3.08333	7.52667	8.75667	2.08667	4.16	3.81333	9.71333	0.882348	0.00351712	0.00742638
F59C12.4.1	WBGene00045272	F59C12.4		196.983	329.36	433.03	564.24	177.067	380.253	493.887	482.5	0.965249	0.00484719	0.00137311
H02I12.6.1	WBGene00001940	his-66	Probable histone H2B 4	759.603	1159.55	1809.79	2496.76	891.193	1453.46	1887.54	2226.58	0.406306	1.46306e-09	2.30392e-05
H06I04.6b.1	WBGene00019170	H06I04.6		3.93333	4.74667	7.95667	11.2133	3.80667	7.19333	7.77	9.55	0.844649	1.39331e-05	0.00618419
H06I04.6b.2	WBGene00019170	H06I04.6		2.38	3.95333	7.70667	8.76333	2.34667	5.40333	7.20333	8.72667	0.491664	3.24547e-09	0.00088916
H06O01.1.1	WBGene00003964	pdi-3		124.903	148.53	218.473	297.137	111.84	182.043	217.763	275.553	0.968663	4.60851e-07	3.78242e-06
H14E04.3.1	WBGene00019200	H14E04.3		1.65667	4.20667	12.0867	11.98	1.35	6.93333	10.48	14.1833	0.501387	9.65528e-06	0.00750381
JC8.14.1	WBGene00044737	ttr-45	TransThyretin-Related family domain	50.16	65.5	199.963	389.653	61.9767	142.44	223.12	437.307	0.12229	2.65523e-07	0.00467659
JC8.8.1	WBGene00010440	ttr-51	TransThyretin-Related family domain	191.75	261.337	787.703	1486.79	193.897	430.743	789.777	1438.51	0.665835	1.99737e-08	0.00283835
K01A6.2d.1	WBGene00010444	magi-1	MAGI (Membrane Associated Guanylate kinase Inverted) homolog	2.81333	3.36	3.94	7.16667	3.17667	3.53667	4.28667	6.44667	0.884032	6.56741e-07	0.0232385
K02A11.3.1	WBGene00010488	endu-1	Poly(U)-specific endoribonuclease homolog	9.27667	10.5333	23.3967	37.3433	9.23333	16.2233	22.7467	29.0133	0.47161	2.19281e-09	0.00277705
K02D10.4.1	WBGene00019304	K02D10.4		1.74	2.45667	4.3	6.47333	1.55	3.44333	4.46667	5.58	0.940545	1.53325e-08	0.0392122
K02G10.8a.1	WBGene00001032	dnj-14	DNaJ domain (Prokaryotic heat shock protein)	2.27	3.62333	4.55667	7.53667	2.95	4.84333	5.55667	5.84	0.578718	0.00076672	0.0376942
K03B4.3a.1	WBGene00006392	taf-10	Transcription initiation factor TFIID subunit 10	1.91	2.43667	2.95667	4.47333	2.49667	2.77667	2.39667	5.14333	0.407131	0.000117823	0.00327695
K06A1.5.1	WBGene00019427	atg-16.2	Autophagic-related protein 16.2	7.96333	8.6	12.8533	22.0367	7.64	10.6667	12.9167	20.5033	0.920955	5.70714e-09	0.0266835
K06G5.1a.3	WBGene00010605	K06G5.1		42.86	145.337	216.06	136.453	59.3	240.877	225.36	124.323	0.209009	0.000227442	0.00517122
K06G5.1a.4	WBGene00010605	K06G5.1		34.2667	93.0467	158.893	115.8	41.1233	183.3	166.01	90.09	0.231257	0.000375286	0.0135364
K08A2.4.1	WBGene00019513	lido-7		3.78	4.72	7.11333	10.27	4.12333	5.74667	6.54	11.06	0.411928	5.12272e-07	0.00332734
K08D9.9.1	WBGene00235094	K08D9.9		91.99	147.167	207.247	249.663	114.76	203.79	186.57	217.17	0.629542	6.12502e-05	0.00702891
K08E3.10.1	WBGene00023451	mlc-7	Myosin Light Chain	17.9967	16.0633	29.2167	44.7833	16.16	22.48	25.3367	41.12	0.652405	6.85898e-08	0.00249423
K08H2.4.1	WBGene00010691	K08H2.4		0.863333	1.68	2.38	3.3	1.31	1.74667	2.22667	3.11	0.828741	1.51384e-05	0.0422165
K11H12.5.1	WBGene00019661	K11H12.5		1.27	2.31	2.94333	3.24667	1.28667	2.58667	3.09	4.06667	0.15777	1.15634e-05	0.00714158
M03A1.7.1	WBGene00000928	dao-2	Dauer or Aging adult Overexpression	1.72	7.60333	10.8467	8.74	3.08333	8.40333	10.3567	7.89667	0.884912	0.00699106	0.0190394
M03A1.7.2	WBGene00000928	dao-2	Dauer or Aging adult Overexpression	0.766667	3.15	4.70333	4.19667	1.38333	4.86667	5.39667	3.81	0.383291	0.0107768	0.00980076
M05D6.4.1	WBGene00010877	lact-4	Beta-LACTamase domain containing	2.80667	4.49667	8.43667	9.01	2.56	6.66667	8.29	8.17667	0.598225	3.90112e-07	0.0172491
M60.4a.1	WBGene00019780	M60.4		2.42	2.57667	5.69	7.91333	2.49667	4.15667	5.09333	8.97667	0.317418	4.56865e-06	0.0219253
R05H5.4.1	WBGene00011039	R05H5.4	Tyrosine-protein kinase	3.75333	5.22333	7.09333	8.4	3.08667	5.91	6.74667	7.7	0.557441	1.55682e-05	3.694e-06
R10E8.8.1	WBGene00011213	R10E8.8		1.18	2.18667	4.22333	10.97	2.25	3.09667	4.68	8.70333	0.913959	2.4446e-09	0.00762983
R119.5b.1	WBGene00020090	R119.5		1.22667	1.18667	1.78667	2.95	1.23333	1.37667	1.70667	3.05	0.730005	3.09994e-06	0.0124881
R11A5.1a.1	WBGene00000163	apb-3	AP-3 complex subunit beta	2.19667	3.67333	5.47	7.83667	1.95333	3.38667	5.16	7.39	0.498031	4.75842e-06	0.00474719
R11H6.4a.1	WBGene00011252	R11H6.4		3.38333	2.41	4.65	8.57667	4.01667	4.06667	4.64667	8.91667	0.17493	2.42271e-06	0.00164863
R12H7.5.1	WBGene00004826	skr-20	SKR-20; SKp1 Related (Ubiquitin ligase complex component)	6.58333	8.05333	11.6	16.2467	7.14667	11.0733	13.35	14.5867	0.176569	1.41009e-06	0.00839002
R166.5b.1	WBGene00011304	mnk-1	MAP kinase-interacting serine/threonine-protein kinase mnk-1	3.53333	3.45333	4.06667	9.75667	2.93	3.93	7.60333	8.55667	0.643089	0.0114114	0.0353236
T02C5.3b.1	WBGene00020160	igcm-3	ImmunoGlobulin-like Cell adhesion Molecule family	1.09	2.33333	2.96333	3.65667	1.23667	3.13667	3.57667	3.78	0.274549	0.00140606	0.0018148
T05A10.1c.1	WBGene00004862	sma-9	SMAll	0.953333	1.45333	1.86333	3.85	0.836667	1.86333	2.16667	2.99	0.790588	3.40877e-05	0.0210568
T05D4.4a.1	WBGene00003887	osm-7		1.56333	2.43333	3.10667	4.25667	1.21333	2.36667	2.72	3.58667	0.123066	1.4154e-05	0.00996715
T06C12.7.1	WBGene00003674	nhr-84	Nuclear Hormone Receptor family	2.05333	3.43667	4.68667	5.47	2.03667	4.81	5.50333	6.58667	0.118357	0.000381763	0.0215598
T10D4.3.1	WBGene00020407	chil-24	CHItinase-Like	0.936667	1.36333	2.16667	3.68333	1.18	1.73333	2.16333	3.76667	0.545197	5.7182e-05	0.00208903
T10H9.4.1	WBGene00004897	snb-1	Synaptobrevin-1	16.6333	19.9233	28.9767	38.2533	14.35	25.4567	27.5867	33.6133	0.583677	1.16819e-07	0.000455645
T12F5.4.1	WBGene00003040	lin-59	Probable histone-lysine N-methyltransferase lin-59	2.16333	2.65667	3.54333	6.24	1.97	3.37333	5.12333	6.14	0.206696	1.34177e-05	0.0413532
T13A10.5b.1	WBGene00003754	nlp-16	Neuropeptide-Like Protein	1.23	1.64333	2.95333	3.61333	1.23	2.24	2.4	2.61333	0.301471	0.000180143	0.000456866
T13C2.6a.1	WBGene00020481	T13C2.6		12.44	13.0767	17.4433	31.53	12.2967	17.1333	20.6967	29.4167	0.439626	6.66902e-06	0.00145729
T14G10.4.1	WBGene00011774	ttr-54	TransThyretin-Related family domain	4.94667	8.46	17.71	29.8367	5.36	9.07333	14.4367	25.66	0.102089	3.56723e-10	0.00761938
T15H9.6.1	WBGene00011791	T15H9.6		1.01	2.30667	4.31667	4.44667	0.9	2.67333	4.22333	4.77333	0.646377	2.95783e-07	0.020742
T19B10.2.1	WBGene00011831	T19B10.2		16.4833	18.6033	41.6467	43.2	20.0533	31.8967	35.9333	26.1767	0.629429	0.00102503	0.0245398
T19B10.3.1	WBGene00011832	bgal-1	Beta-galactosidase	5.66333	6.27667	10.7033	13.72	6.57333	9.61	10.6533	12.23	0.220308	1.37901e-06	0.0176034
T19C3.4.1	WBGene00020562	T19C3.4		1.66667	2.01333	3.06	5.56	1.75333	2.88333	3.46	4.70333	0.567053	1.34887e-07	0.0284487
T24H10.7d.1	WBGene00012005	jun-1	Transcription factor jun-1	3.72333	5.30333	8.72667	8.84	4.73667	7.71667	8.56333	9.12	0.113509	5.10142e-05	0.017826
T25E12.4e.1	WBGene00012019	dkf-2	Serine/threonine-protein kinase dkf-2	1.83667	2.32333	2.94667	5.45	1.69333	2.47667	3.63	4.76	0.998462	0.000419384	0.000166827
T27E4.2.1	WBGene00002017	hsp-16.11	Heat shock protein Hsp-16.1/Hsp-16.11	3.62667	19.0733	41.55	66.7467	13.3233	28.0633	39.9733	48.16	0.941501	3.95173e-05	0.0017891
T27E4.9.1	WBGene00002020	hsp-16.49	Heat shock protein Hsp-16.48/Hsp-16.49	1.93	12.4	22.1767	25.6	8.08333	11.8567	23.68	28.1867	0.52598	0.00369818	0.0341214
W01F3.2.1	WBGene00012185	W01F3.2		18.7033	32.5833	79.5067	107.59	23.7167	48.39	72.89	90.1667	0.83772	4.05975e-09	0.0266679
W02D9.6.1	WBGene00012212	W02D9.6		43.88	34.0567	68.4667	138.107	32.72	42.6067	63.4433	141.183	0.92273	5.67789e-05	0.035622
W03F11.1a.1	WBGene00021005	ule-1	Uterine Lumin Expressed/locailized	52.6067	99.4967	170.71	247.697	45.88	127.107	158.48	230.233	0.783461	8.14845e-10	0.0103903
W05H9.1a.1	WBGene00021048	W05H9.1		15.9467	62.42	165.957	147.633	16.1767	82.9767	132.4	181.01	0.715697	7.13357e-06	0.00128745
W05H9.1b.1	WBGene00021048	W05H9.1		1.65667	5.01	12.1967	12	1.75	6.35	10.2667	15.4	0.471074	2.12703e-06	0.000558232
W08A12.2a.1	WBGene00021079	W08A12.2		7.37667	11.7633	22.3633	37.6267	7.65333	15.8233	25.4767	41.6	0.162118	7.40625e-08	0.0389067
W09C2.3b.1	WBGene00003151	mca-1	Calcium-transporting ATPase	1.59333	2.13333	4.06	4.76333	1.63667	3.48333	3.46667	4.20333	0.865949	0.000282206	0.005374
W09C3.7.1	WBGene00021114	W09C3.7		9.25333	9.17667	21.9367	38.2167	8.52333	12.5967	19.4167	33.2	0.492029	8.94738e-08	0.00444516
Y105E8B.8c.1	WBGene00001334	ero-1	Endoplasmic reticulum oxidoreductin-1	4.21333	5.34	8.11	10.26	4.85667	6.19	7.01	9.16667	0.758548	7.65291e-05	0.000183781
Y106G6D.8.2	WBGene00013704	Y106G6D.8		34.3033	39.51	65.29	89.7833	28.9033	47.7767	64.5867	82.5067	0.679723	2.28131e-08	0.00101759
Y108G3AL.3b.1	WBGene00022435	cfap-36	Cilia- and flagella-associated protein 36	1.85667	2.75333	4.33	5.99333	1.11333	3.48667	3.72333	5.09333	0.289922	8.2769e-06	0.00118925
Y110A2AL.4b.1	WBGene00022441	Y110A2AL.4		0.78	2.66	4.28	4.54	1.60333	4.94667	5.88333	6.21667	0.118069	0.0309659	0.00676728
Y111B2A.8a.1	WBGene00013732	aakg-1	AMP-Activated protein Kinase Gamma subunit	3.54667	3.79	4.89333	11.4567	2.27667	4.74	8.28667	11.3033	0.510364	0.000392084	0.00681289
Y18D10A.3.1	WBGene00012476	Y18D10A.3	NAD(P)H-hydrate epimerase	2.09333	1.72667	3.57333	5.84333	1.54333	2.37333	3.23333	5.34667	0.526311	6.54342e-07	0.0011769
Y37A1A.2.1	WBGene00012535	Y37A1A.2		3.29667	3.54	6.08667	8.96	3.44333	4.35333	5.08667	7.33667	0.321479	3.5751e-06	0.020863
Y37A1B.2d.1	WBGene00003086	lst-4	Sorting nexin lst-4	3.25	4.6	7.13333	10.8133	3.32	4.95	7.03667	9.68	0.676154	3.58107e-07	3.8662e-05
Y37E11AR.3b.1	WBGene00021370	nape-2	N-Acyl Phosphatidyl Ethanolamine specific phospholipase D (NAPE-PLD) homolog	2.5	3.32	5.29333	9.86667	2.58333	4.91333	4.39	6.23	0.179357	1.93761e-05	0.00347758
Y37E11C.1c.1	WBGene00006769	unc-33		2.40667	2.73667	4.04667	6	2.25667	3.86	4.25333	5.73667	0.511482	2.89472e-05	0.00925047
Y37H2A.4.1	WBGene00012564	fbxa-107	F-box A protein	12.1667	19.8833	25.37	29.0233	13.47	24.9833	21.8967	28.28	0.671673	4.00764e-06	0.00262214
Y37H9A.5.1	WBGene00014871	Y37H9A.5		4.87	7.15	11.76	15.3733	6.13333	10.6367	10.6867	13.9467	0.398869	8.33302e-07	0.0143412
Y38A10A.5.2	WBGene00000802	crt-1	Calreticulin	152.133	163.14	235.363	410.937	165.41	223.577	269.043	373.213	0.435008	1.27472e-05	0.000403445
Y39A1A.1c.1	WBGene00012641	epg-6	Ectopic P Granules	1.91667	2.48	3.46333	7.21333	3.15333	1.42	4.26	7.65333	0.546083	3.79193e-05	0.0186925
Y39A3CL.5a.1	WBGene00000545	clp-4	CaLPain family	4.02667	4.06	7.66	13.8967	3.97333	5.06333	7.1	13	0.871591	1.71661e-06	0.00346655
Y39A3CL.6.1	WBGene00004249	pvf-1	PDGF/VEGF growth factor related	4.02333	6.90667	13.7167	25.6333	3.7	7.46333	10.8867	21.8333	0.317565	1.6706e-06	0.000673302
Y39H10A.6a.1	WBGene00021482	Y39H10A.6		2.73333	2.7	4.25667	7.21667	2.88	3.35333	4.04	6.6	0.98021	1.42856e-06	0.000505482
Y41C4A.8.1	WBGene00012755	Y41C4A.8		3.40333	5.85	12.0533	12.46	3.82333	9.07667	10.77	11.0067	0.812858	7.27303e-05	0.00176404
Y43C5A.3.1	WBGene00012783	Y43C5A.3		4.81	4.1	13.3533	27.2867	5.13333	7.47667	10.2967	23.3633	0.527595	5.27543e-08	0.0101945
Y44A6C.1.1	WBGene00012850	Y44A6C.1		1.10667	1.41	1.96667	4.93667	1.17667	1.69	2.04667	3.2	0.224831	6.1369e-06	0.024057
Y45G5AL.1a.1	WBGene00021554	Y45G5AL.1		1.76667	1.75667	2.41	4.38	1.42333	1.97667	2.32	3.58333	0.412848	0.000272056	0.0402176
Y45G5AM.3a.1	WBGene00021556	Y45G5AM.3		2.38667	3.45	5.51	7.12333	3.30667	4.15	5.74	7.06	0.208263	1.85545e-06	0.000142367
Y47H9C.5b.1	WBGene00001045	dnj-27	DNaJ domain (Prokaryotic heat shock protein)	2.11333	3.73	4.85333	6.29667	2.9	3.33667	4.14	5.28333	0.194711	1.41089e-06	0.022979
Y48B6A.6c.1	WBGene00012980	efhd-1	EF HanD calcium binding protein	2.7	6.16667	8.88	12.5067	4.22333	8.53667	10.4133	12.6533	0.123105	2.14418e-05	0.0249461
Y51A2D.13a.1	WBGene00013080	Y51A2D.13		6.73	5.29333	11.67	17.07	4.68333	8.15	11.5167	11.35	0.322072	0.000650902	0.00588223
Y54G2A.11a.1	WBGene00021876	Y54G2A.11		1.46	1.86667	2.24333	4.65667	1.87	2.16333	2.30667	3.01	0.261689	5.40144e-06	0.000192431
Y54G2A.4.1	WBGene00021870	samt-1	SAM (S-Adenosyl Methionine) Transporter	1.93667	1.89	3.26	5.02	1.8	2.41	2.95	4.47333	0.732865	0.000136067	0.000430334
Y57A10A.26.1	WBGene00013266	Y57A10A.26		5.50333	5.73667	10.6567	20.7	5.44333	7.95	10.5267	16.45	0.476064	3.14349e-08	0.00733531
Y57G11B.2b.1	WBGene00013295	Y57G11B.2		1.90667	2.41667	3.31667	5.42667	2.70333	2.08667	2.26667	3.97	0.226474	0.00220683	0.0125037
Y66D12A.13.1	WBGene00013439	Y66D12A.13		1.46333	2.29667	5.52333	5.77333	0.846667	3.67667	4.11667	4.01667	0.256228	0.000331938	0.00175705
Y67D2.1a.1	WBGene00022051	rep-1	Rab GDP dissociation inhibitor	3.28333	6.68	9.4	8.13333	5.82	4.32	9.66667	10.15	0.538112	0.00490932	0.00309618
Y67D8A.3.1	WBGene00022060	dmd-9	DM (Doublesex/MAB-3) Domain family	1.6	4.13	6.27667	6.26	1.94	4.86667	4.82667	5.09667	0.315636	8.43919e-06	0.000588058
Y71F9AL.4.1	WBGene00022110	Y71F9AL.4		2.89333	2.74667	3.85667	6.39333	2.37	3.12333	3.22333	7.40667	0.873299	2.34153e-06	0.000568393
Y73B6BL.44.1	WBGene00044350	Y73B6BL.44		3.22333	2.94	5.65333	8.73667	3.51667	4.36667	5.29	6.84333	0.606299	2.01658e-08	0.00197814
Y73F8A.6.1	WBGene00000370	ccg-1	Conserved Cysteine/Glycine domain protein	22.98	23.8167	62.8133	127.923	21.8133	35.9	54.9	112.34	0.651457	2.78136e-07	0.000951115
Y75B8A.9a.1	WBGene00001636	gly-11	Putative polypeptide N-acetylgalactosaminyltransferase 11	1.89667	2.14667	3.74	6.15667	1.45667	2.49	3.67667	5.94	0.801149	3.68596e-06	0.00990021
Y77E11A.14c.1	WBGene00022314	Y77E11A.14		1.16333	2.54333	4.87667	7.07	1.12667	2.20667	3.82667	7.78667	0.6324	4.04165e-08	0.00153389
Y79H2A.1a.1	WBGene00000273	brp-1	Bypass of Response to Pheromone in yeast	25.5567	35.7233	65.0433	96.4867	31.3333	47.0867	57.98	63.6333	0.2129	4.42449e-06	0.00762849
Y7A9D.1.1	WBGene00012420	Y7A9D.1		1.56	2.59	3.64333	3.94333	2.71	3.20333	3.40667	4.43	0.149804	0.00405036	0.000886207
Y94H6A.6.1	WBGene00006705	ubc-8	UBiquitin Conjugating enzyme	1.02667	1.64667	2.61333	5.05	1.35	1.85333	2.65	4.35667	0.886454	9.78062e-08	0.00104188
ZC21.10.1	WBGene00044443	ZC21.10		2.57333	5.26333	5.73	6.76	2.84667	6.26	6.82667	5.22333	0.821669	0.0481282	0.000527032
ZC443.3.1	WBGene00013898	ZC443.3		2.32333	4.54333	9.01	23.63	3.44	8.31667	13.14	17.2433	0.373098	4.80511e-10	0.0019152
ZC504.4a.1	WBGene00003247	mig-15	Serine/threonine-protein kinase mig-15	1.27	2.13667	2.71333	3.49	1.38	2.77667	2.68	3.24	0.721973	0.0041874	0.0146299
ZK1005.1b.1	WBGene00004053	tank-1	Poly [ADP-ribose] polymerase tankyrase	4.59333	5.45	6.79	10.9167	5.33	6.97	7.26333	12.61	0.153694	7.29048e-05	0.00154892
ZK1067.2a.1	WBGene00014208	ZK1067.2		1.68333	2.06333	2.12667	4.13	1.66667	2.24667	3.19333	4.34667	0.307543	0.000680613	0.0130055
ZK1320.2.1	WBGene00014252	ZK1320.2		51.93	99.9133	195.43	168.6	53.9633	172.07	198.137	153.643	0.260113	1.66173e-05	0.00347829
ZK154.6a.1	WBGene00022668	ZK154.6		1.37667	1.68333	2.39667	3.72	1.06333	1.89667	1.93	3.42333	0.324443	1.28835e-05	0.0125149
ZK177.9.1	WBGene00022674	ZK177.9		3.82667	15.1067	24.3933	31.61	3.28	17.6	24.56	31.41	0.782873	1.03992e-07	0.0124357
ZK484.1b.1	WBGene00022748	oaz-1	Ornithine decarboxylase antizyme	5.65667	7.59333	11.1267	17.44	6.52667	10.3933	12.4167	12.4667	0.997538	0.000270544	0.00590674
ZK484.1b.5	WBGene00022748	oaz-1	Ornithine decarboxylase antizyme	2.23667	4.17333	3.76667	7.37667	2.65	4.03667	5.84667	5.71667	0.84982	0.0426374	0.0249806
ZK596.1.1	WBGene00014006	ZK596.1		7.83	12.54	25.3	41.6867	8.40333	20.8833	23.5733	53.76	0.273577	7.87302e-05	0.00289226
ZK632.10.1	WBGene00014017	ZK632.10	UPF0057 membrane protein ZK632.10	27.26	38.24	56.7867	70.2633	32.95	49.7233	53.4333	66.2567	0.277861	4.9672e-08	2.0883e-06
ZK795.1.1	WBGene00014081	ipmk-1	Kinase	1.57	1.79667	2.65	3.91667	1.58667	2.51667	2.64333	4.12333	0.255737	3.70825e-06	0.0159533
ZK822.2.1	WBGene00014090	ZK822.2		31.2667	31.2933	62.5367	101.603	32.1033	38.5633	56.7	98.2733	0.949695	3.72764e-08	0.00795234
ZK909.3.1	WBGene00014148	ZK909.3		8.79333	10.33	17.7933	22.89	8.7	14.6767	18.76	21.8967	0.227771	7.6196e-08	0.00758565
ZK909.6.1	WBGene00014150	ZK909.6		15.2167	20.28	46.2133	71.1267	17.4133	26.57	42.2133	63.2267	0.757813	1.02094e-08	0.00278203
ZK930.2.1	WBGene00014152	ZK930.2		8.45	7.57	13.4933	23.3333	8.59	10.37	13.9067	23.88	0.289555	2.35378e-08	0.000619112
ZK945.1.1	WBGene00014164	lact-2	Beta-lactamase domain-containing protein 2	16.7667	25.8667	38.05	55.5167	15.2433	36.8467	36.3133	46.37	0.936982	0.000652316	0.000494861

## Sheet: physiological_slope_change_dn
Supplemental Table S1. Age-dependently regulated transcripts associated with physiological or chronological aging
Age-dependently downregulated transcripts associated with physiological aging: slope change
Transcript_ID: Detected transcript, Gene_ID and Gene_name: A gene contains the transcript, WT_d1 to daf-2_d11: Transcript levels in wild-type (WT) and daf-2 mutant animals at different ages
p_genotype: Significance of genotypes on transcript levels, p_age: Significance of ages on transcript levels, p_interaction: Significance of the interaction between genotypes and ages on transcript levels
Transcript_ID	Gene_ID	Gene_name	Description	WT_d1	WT_d4	WT_d7	WT_d11	daf-2_d1	daf-2_d4	daf-2_d7	daf-2_d11	p_genotype	p_age	p_interaction
B0001.7b.1	WBGene00007092	B0001.7		5.25333	3.17	2.14333	2.30333	4.25667	3.24333	2.03	2.33667	0.572874	0.00273375	0.00422475
B0001.8a.1	WBGene00007093	B0001.8		10.56	8.10333	5.86667	5.67333	8.91333	8.13333	5.89	7.13333	0.952647	0.00084056	0.000574563
B0001.8b.1	WBGene00007093	B0001.8		4.95	3.36	2.63	1.40333	4.42333	3.40333	1.23	1.23333	0.219106	0.000149935	0.00917356
B0035.12.2	WBGene00007111	sart-3	SART-3/p110 homolog	10.3433	7.1	5.53333	4.44333	9.35333	7.13333	5.13667	6.5	0.787733	0.000630394	0.00466299
B0303.15.1	WBGene00015133	mrpl-11	Probable 39S ribosomal protein L11, mitochondrial	45.2633	30.04	27.7367	22.7	38.35	31.8733	23.2167	27.4733	0.622785	0.000685532	0.00666269
B0336.3c.1	WBGene00015143	rbm-26	RNA Binding Motif protein homolog	6.52333	5.49333	4.29	2.98333	5.25667	5.78333	3.60667	4.08667	0.806652	0.0206322	0.00173767
B0336.9a.1	WBGene00006359	swp-1		4.60667	3.34333	2.26	0.89	3.87	2.94333	1.71667	1.22	0.461081	0.00103872	0.00806138
B0348.6c.2	WBGene00002061	ife-3	Eukaryotic translation initiation factor 4E-3	7.4	5.54333	4.21667	3.11	5.33667	5.52	3.32667	2.55667	0.234914	0.0132237	0.00284397
B0361.3.1	WBGene00015157	B0361.3		11.3967	7.56	6.60333	5.45667	9.06667	9.05	6.4	6.79667	0.921481	0.00555951	0.0206725
B0379.1a.1	WBGene00007155	B0379.1		8.95333	2.41	2.34667	1.91	8.85	3.24333	2.23333	1.96333	0.690778	2.07031e-08	0.0413358
B0491.7.1	WBGene00007194	B0491.7	Diphthine synthase	23.6433	14.2067	9.67333	8.61667	18.83	13.9133	8.7	10.14	0.237402	6.09802e-07	0.0394195
B0511.8.2	WBGene00044321	mrps-30	Mitochondrial Ribosomal Protein, Small	26.2	14.7333	12.18	11.7633	19.47	15.37	10.3267	13.02	0.359295	0.00162154	0.00224037
B0513.5a.1	WBGene00007197	prdh-1	Proline dehydrogenase 1, mitochondrial	4.52667	1.54667	1.12667	1.60667	3.08333	2.34333	1.76667	1.72	0.92914	0.000209417	0.0443651
B0546.1.1	WBGene00015248	mai-2	ATPase inhibitor mai-2, mitochondrial	164.69	98.5867	95.6067	88.27	135.273	103.017	82.5067	96.2867	0.191509	4.53382e-06	0.0012387
B0564.1a.1	WBGene00007201	exos-4.1	Putative exosome complex component RRP41	14.2933	10.8433	7.64333	7.29667	10.3533	9.82667	7.52	8.26667	0.26562	0.00558218	0.00129566
BE0003N10.1.1	WBGene00015266	BE0003N10.1		3.95	3.19	2.18333	1.78	3.92667	3.62	2.08333	2.22667	0.460192	0.000129346	9.23773e-05
C01A2.3.1	WBGene00007215	oxa-1	OXA mitochondrial inner membrane insertase homolog	13.8167	7.09	5.40667	5.00667	9.70667	7.09333	5.27333	6.03333	0.314877	0.000114587	0.0088207
C01B10.8.1	WBGene00015282	C01B10.8		10.33	6.08333	5.3	5.04	6.53	6.01333	4.21	5.78667	0.193771	0.0237956	0.0078073
C01B10.8.2	WBGene00015282	C01B10.8		8.63667	6.24	3.89333	3.9	8.47	6.77667	4.16333	4.84333	0.554741	0.000760736	0.0012283
C01B12.8.1	WBGene00015291	C01B12.8		20.5567	26.6433	17.53	11.1867	21.9133	27.65	15.8967	13.0467	0.631365	9.60736e-06	0.00167899
C01G10.7.1	WBGene00007234	C01G10.7		19.5533	17.2167	14.5567	10.4533	16.6333	17.2433	11.4067	10.12	0.138066	0.000238879	0.000469637
C01G5.8a.1	WBGene00015310	fan-1	Fanconi-associated nuclease 1 homolog	9.97333	8.41	7.05	5.33667	8.63	8.57667	6.16667	6.62333	0.734216	0.00263555	0.000157541
C03F11.3.1	WBGene00015389	scav-1	SCAVenger receptor (CD36 family) related	4.67	3.56333	4.37667	2.24667	4.03667	3.93	2.44	3.39667	0.409072	0.0242455	0.031366
C04C3.3.1	WBGene00015413	pdhb-1	Pyruvate dehydrogenase E1 component subunit beta, mitochondrial	34.1733	19.54	14.2367	11.7133	26.0833	19.4267	11.0667	11.8733	0.213326	9.87061e-05	0.00204885
C04E6.11.1	WBGene00015425	C04E6.11		6.75667	4.52667	2.62333	2.54	5.37333	4.38333	2.65667	3.38333	0.716034	0.000260615	0.00113544
C04G2.6.1	WBGene00001001	dis-3	Probable exosome complex exonuclease RRP44	16.4933	12.3233	8.22333	8.44667	13.9667	13.0233	8.07	10.3067	0.982416	0.00873872	0.0221371
C05C8.2.1	WBGene00015461	krr-1	KRR1 small subunit processome component	36.68	23.31	19.84	18.93	30.2267	24.43	17.3067	20.69	0.431715	0.000269008	0.00314905
C05C8.6.1	WBGene00015463	hpo-9		32.2267	22.9033	17.8267	17.5233	27.38	23.6167	16.0533	18.7633	0.458565	0.000134054	0.000527863
C05D11.11a.1	WBGene00003214	mel-32	Serine hydroxymethyltransferase	125.063	69.85	63.9933	60.4567	90.6433	74.2167	53.7867	64.8733	0.354719	0.00914261	0.0038157
C06A6.3.1	WBGene00015508	mvb-12	MVB (Yeast MultiVesicular Body sorting factor) related	6.14333	2.46667	2.29	2.65333	3.47667	3.43667	3.29333	3.09667	0.9004	0.0318459	0.000370869
C06H2.3b.1	WBGene00007387	jmjd-5	JuMonJi (Transcription factor) Domain protein	17.8967	13.7267	10.3033	6.56667	17.1233	12.93	7.18333	5.8	0.126289	8.28205e-07	0.0046424
C09B8.6a.1	WBGene00002023	hsp-25	Heat Shock Protein	6.98333	3.34333	3.96	3.84333	7.72333	4.14667	3.67333	3.84333	0.480873	6.55782e-05	0.00213389
C14A4.14.1	WBGene00007564	mrps-22	Mitochondrial Ribosomal Protein, Small	22.1567	13.15	11.8367	11.6167	17.4733	13.5	10.2667	13.29	0.431145	0.00152429	0.0021154
C14A6.1.1	WBGene00007565	clec-48	C-type LECtin	13.9733	5.46	5.25	3.14	11.9033	6.00667	3.14	3.31333	0.316075	3.59452e-06	0.00730333
C14B9.8b.1	WBGene00015754	C14B9.8	Probable phosphorylase b kinase regulatory subunit alpha	6.07667	3.98	2.24667	1.74667	5.05	4.41667	1.99	2.01667	0.739135	5.83301e-05	0.00375844
C14C10.4.1	WBGene00007587	mma-1		27.08	17.9367	15.0033	12.42	20.96	18.9033	12.45	13.1567	0.305506	0.000933336	0.00115683
C14C11.2.2	WBGene00015766	C14C11.2		11.52	9.31	7.56	5.64333	8.66	8.25333	5.34667	6.82667	0.115203	0.00584951	4.7522e-05
C14C11.6.1	WBGene00003507	mut-14	MUTator	18.4367	11.56	9.49667	8.86	14.6167	12.6467	8.38667	10.8167	0.611094	0.000171932	0.000476349
C15H11.5.1	WBGene00007615	set-31	SET (Trithorax/polycomb) domain containing	13.4733	9.93	6.85333	6.46333	9.79667	8.71	7.29333	7.82667	0.3031	0.00146892	0.000213253
C16A3.10.2	WBGene00015814	oatr-1	Probable ornithine aminotransferase, mitochondrial	25.3467	25.48	24.1333	13.2733	27.1567	28.9	19.58	16.3867	0.634922	0.00199444	0.00225272
C17G10.1.1	WBGene00015915	C17G10.1		26.42	20.73	16.6233	14.3833	23.6267	22.3933	14.8533	16.5133	0.88989	0.000420944	0.00106382
C17G10.13.2	WBGene00270322	C17G10.13		16.4233	14.72	11.79	8.11333	14.9267	12.9433	8.67667	9.04	0.141743	0.000186541	0.000286539
C17G10.2.1	WBGene00015916	ttc-4	TeTratriCopeptide repeat domain protein related	18.7833	14.3767	10.58	9.88667	16.3433	14.8233	9.88667	11.8667	0.88688	0.00254497	0.000558272
C17H12.8.2	WBGene00015933	C17H12.8		22.1	6.81667	10.53	1.82333	20.1167	4.86333	7.25333	1.64667	0.519857	0.00150711	0.0186162
C18A11.3.1	WBGene00015949	C18A11.3		3.78	2.59667	2.26667	0.973333	2.73333	3.53333	1.47333	0.73	0.190317	2.88226e-06	0.0277223
C18E9.3d.1	WBGene00004105	szy-20	Suppressor of zyg-1 protein 20	6.40667	4.90333	3.28	3.10333	4.98	5.12	3.2	2.29333	0.324593	0.00289679	0.00164278
C18G1.4a.1	WBGene00003994	pgl-3	Guanyl-specific ribonuclease pgl-3	41.6367	34.34	22.4467	16.1033	33.02	32.95	17.9933	20.4833	0.425184	0.00104583	0.000160443
C23G10.7b.1	WBGene00016014	C23G10.7	Probable tRNA (uracil-O(2)-)-methyltransferase	7.96667	4.59333	3.07	3.30667	5.19	4.55667	3.16667	3.8	0.155026	5.42852e-05	0.0445463
C23G10.7c.1	WBGene00016014	C23G10.7	Probable tRNA (uracil-O(2)-)-methyltransferase	9.71	6.48	4.70333	5.09667	8.94333	6.50333	4.73	5.92	0.959697	0.000115301	0.00267882
C24A11.9.1	WBGene00000761	coq-1	COenzyme Q (Ubiquinone) biosynthesis	14.8333	10.3467	10.4967	7.59333	12.65	11.37	8.99667	9.35333	0.739644	0.000461544	0.00269356
C24H12.5b.1	WBGene00016074	dnsn-1	Downstream Neighbor of SoN homolog	4.46333	4.04667	2.96	1.55333	3.63333	3.65667	2.06	1.64667	0.248113	0.002975	0.00217041
C25A1.20.1	WBGene00303030	C25A1.20		14.4133	8.88333	6.30333	7.08	10.97	8.13333	6.02667	7.88	0.349546	0.00152736	0.00946774
C25A1.7.1	WBGene00002153	iars-2	Isoleucyl Amino-acyl tRNA Synthetase	11.44	6.57	5.39333	6.09333	8.78667	6.43333	5.16333	7.38667	0.502055	0.000578655	0.00180779
C25B8.3a.1	WBGene00000786	cpr-6	Cathepsin B-like cysteine proteinase 6	144.327	126.843	111.477	59.8967	138.587	173.327	94.58	57.3733	0.39646	1.47273e-07	0.00783439
C25H3.11c.1	WBGene00016120	C25H3.11		4.38	3.07333	2.09667	1.56667	4.26333	3.21333	2.06	1.93	0.807669	0.000593852	0.000282281
C25H3.4.1	WBGene00016113	eif-2D	Eukaryotic Initiation Factor	8.99333	7.93333	5.08667	4.80333	8.79333	6.74333	4.10333	6.01333	0.665415	0.00170418	0.0233707
C25H3.4.2	WBGene00016113	eif-2D	Eukaryotic Initiation Factor	9.97	5.19	4.50333	3.39333	7.31667	6.45667	4.13	2.93333	0.463755	0.000752385	0.0473728
C26E6.7a.1	WBGene00016143	eri-9	Enhanced RNAI (RNA interference)	4.69	3.73667	2.02	2.21333	3.16667	3.79333	2.07333	2.02667	0.353704	0.00760835	0.00581108
C27D8.4.1	WBGene00007780	C27D8.4		19.22	16.5533	10.9033	10.1867	16.6767	15.7133	10.59	12.3067	0.65273	5.41135e-05	0.000258238
C29E4.13c.1	WBGene00043051	C29E4.13		8.02333	6.80667	4.32667	3.52333	7.05333	7.2	4.40333	3.34	0.762145	0.000246807	0.0265103
C29E4.8.1	WBGene00002879	let-754	Adenylate kinase	26.6233	16.5267	15.13	13.53	19	17.9167	12.8633	13.7867	0.12321	0.000473035	0.000106974
C30B5.1.1	WBGene00077732	szy-4	Suppressor of ZYg-1	24.53	23.6033	17.4267	11.8267	21.36	22.8	14.1967	12.7633	0.404061	0.00156959	0.000275618
C30F12.2.2	WBGene00016261	C30F12.2		6.24667	4.83	4.57	3.48	5.54333	4.63	3.46667	3.46333	0.281019	0.0112761	0.035677
C30G12.6a.1	WBGene00016277	C30G12.6		9.50333	5.98	4.59667	4.74667	8.02333	6.42	4.38667	5.52667	0.850218	0.00112709	0.00803485
C32A3.2.1	WBGene00007859	mrps-31	28S ribosomal protein S31, mitochondrial	20.81	13.1767	9.88333	7.99333	16.8733	13.2367	8.80667	9.16667	0.320936	5.40613e-06	0.0225991
C32F10.8a.1	WBGene00016333	C32F10.8		10.9733	6.73667	7.03667	5.80667	9.06667	7.5	5.84	7.52333	0.803072	0.00337223	5.61814e-05
C34B2.7.1	WBGene00016392	sdha-2	Succinate dehydrogenase [ubiquinone] flavoprotein subunit, mitochondrial	19.5467	12.17	9	6.92333	13.9467	11.0267	8.43667	10.57	0.517972	0.00312097	0.00141841
C34B2.7.2	WBGene00016392	sdha-2	Succinate dehydrogenase [ubiquinone] flavoprotein subunit, mitochondrial	19.3433	13.1633	9.42667	10.2733	17.6467	14.4767	7.82333	9.57	0.645829	0.00105414	0.00124366
C34E10.10.1	WBGene00016411	C34E10.10		14.61	9.63333	7.48667	6.75	13.03	9.62	7.16	8.35667	0.905212	1.56801e-05	0.031941
C34E10.11.1	WBGene00016412	mrps-26	Mitochondrial Ribosomal Protein, Small	29.3367	16.4433	15.3367	14.7	22.9	16.9033	12.77	15.1333	0.152089	5.61768e-05	0.0145087
C35E7.8.1	WBGene00016460	C35E7.8		8.16333	5.94333	4.86667	3.85333	6.43	5.65333	4.08333	5.12	0.321743	0.000267385	7.93974e-05
C36E6.3.1	WBGene00003369	mlc-1	Myosin regulatory light chain 1	59.92	12.44	13.3233	10.3633	57.4267	15.7567	11.0467	11.7567	0.997495	8.17362e-06	0.0164919
C36E6.5.1	WBGene00003370	mlc-2	Myosin regulatory light chain 2	395.597	89.84	78.1233	60.3433	373.63	100.38	55.4033	47.4433	0.559895	2.08484e-08	0.0171959
C37C3.18b.1	WBGene00303000	C37C3.18	Eukaryotic translation initiation factor 5	23.1967	13.74	11.29	8.74	16.56	11.51	8.38667	9.19	0.111773	0.0015541	0.000306763
C38D4.4.1	WBGene00008005	C38D4.4		20.92	15.21	11.6667	9.62	17.3033	14.7233	9.41333	11.81	0.441794	0.00107837	5.34637e-05
C39D10.8c.1	WBGene00016535	C39D10.8		5.69333	2.42667	2.09333	2.01333	5.17	3.38667	2.41	3.10333	0.168971	1.9136e-05	0.0254366
C39E9.14a.1	WBGene00001007	dli-1	Dynein Light Intermediate chain	9.8	8.51333	5.78	4.58	7.20333	7.38667	5.06	3.23	0.102485	0.00468647	0.000711948
C41D11.2.1	WBGene00001231	eif-3.H	Eukaryotic translation initiation factor 3 subunit H	26.4433	17.44	13.7067	13.6333	21.07	18.19	13.74	15.2633	0.595187	0.00049334	0.00104247
C41G7.3.1	WBGene00008061	C41G7.3		11.6333	7.61667	5.36	4.94333	9.3	7.74667	4.89667	5.66667	0.507731	0.000332433	0.00065783
C43E11.4.1	WBGene00007001	tufm-2	Mitochondrial elongation factor Tu homologue; TU elongation Factor (EF-Tu), Mitochondrial	20.5633	14.7767	11.7367	9.89333	16.6267	14.12	9.02	10.01	0.217218	0.00188139	0.00112849
C43E11.9.1	WBGene00016607	C43E11.9	60S ribosome subunit biogenesis protein NIP7 homolog	41.8	21.2367	19.53	19.3667	34.3867	21.94	17.5567	21.24	0.329488	2.95005e-06	0.0089132
C44E4.1b.1	WBGene00016650	ubr-4	UBR E3 ubiquitin ligase homolog	7.65	4.27	2.65333	2.67333	6.44667	4.29	3.06333	3.17	0.902462	0.000299591	0.00141516
C44E4.3.1	WBGene00016652	got-2.1	Aspartate aminotransferase	32.25	16.28	12.8567	12.0167	21.7767	15.6567	10.6	14.95	0.181339	0.000185843	0.000563513
C44E4.6.1	WBGene00016655	acbp-1	Acyl-CoA-binding protein homolog 1	84.0333	39.2767	38.0367	33.6167	69.8667	39.9867	25.97	40.8767	0.391539	8.77803e-05	0.0471838
C45B11.1a.1	WBGene00006443	pak-2	Serine/threonine-protein kinase pak-2	12.65	12.31	9.92667	5.03	10.93	12.7567	8.37333	5.48	0.596806	0.00143855	0.00572178
C45G3.3.1	WBGene00001590	C45G3.3		14.86	11.57	10.1633	7.42667	13.2033	11.66	8.22	8.97667	0.489971	0.000153925	0.0415426
C46A5.5b.1	WBGene00016701	dsb-3	Double-Strand Break factor	10.66	7.06667	5.95667	5.36	8.30333	6.86667	5.20333	6.89333	0.425153	0.000809015	0.000756322
C47B2.9.1	WBGene00008134	C47B2.9		10.5233	7.27	5.84	5.59667	10.21	6.80333	5.17667	6.29333	0.691171	1.18361e-05	0.0027993
C48B4.10.1	WBGene00008173	C48B4.10		9.67333	4.83667	4.45667	5.57333	7.77333	4.99667	3.74	7	0.627629	0.00011071	0.00450746
C48B4.9.1	WBGene00008172	C48B4.9		14.1867	12.39	8.36333	4.84667	11.3833	12.6567	7.20333	5.22	0.387502	7.25897e-05	0.000636594
C49F5.1.2	WBGene00008205	sams-1	Probable S-adenosylmethionine synthase 1	18.8167	9.35333	4.14	3.05333	14.85	9.85667	4.08	3.88	0.570128	3.15248e-06	0.0374097
C49H3.11.1	WBGene00004471	rps-2	40S ribosomal protein S2	229.297	128.723	118.337	122.657	197.007	125.877	92.1933	138.237	0.387877	0.000190783	0.00119484
C49H3.11.2	WBGene00004471	rps-2	40S ribosomal protein S2	396.487	208.003	201.153	198.977	321.377	240.993	176.23	232.693	0.713906	0.000417006	0.000250163
C50F7.4.1	WBGene00016844	sucg-1	Succinate--CoA ligase [GDP-forming] subunit beta, mitochondrial	42.6	28.8533	19.4433	15.4867	33.9933	27.87	16.3333	17.2667	0.241104	1.90989e-05	0.00162008
C51E3.9a.1	WBGene00008254	C51E3.9		3.13333	1.13667	1.37667	1.30333	2.84333	2.13	1.33	1.65667	0.395505	0.00431384	0.0252891
C53B7.4.1	WBGene00000210	asg-2	Probable ATP synthase subunit g 2, mitochondrial	83.9267	36.3733	36.5867	42.7433	69.09	40.0533	32.17	42.6167	0.29952	3.42922e-06	0.0239817
C54E4.2a.2	WBGene00016918	test-1	Vertebrate proteoglycan TESTican homolog	24.83	7.62667	8.98667	8.55667	20.76	7.39333	6.82667	6.87	0.144684	1.40018e-06	0.0415065
C56C10.1.1	WBGene00016960	vps-33.2	Vacuolar protein sorting-associated protein 33B	14.1533	12.9733	9.86667	6.66333	12.3233	12.0733	7.45667	7.34	0.230119	0.000466415	0.000182753
D1086.4a.1	WBGene00001864	him-5	High Incidence of Males (Increased X chromosome loss)	9.67667	9.15667	6.62667	4.68	9.29333	9.19667	6.00667	5.67	0.987923	8.53663e-06	0.0041862
D1086.8a.1	WBGene00008395	D1086.8		5.23	2.27	2.16667	1.94333	4.92	2.55333	2.10667	2.42	0.587677	1.77014e-08	0.0022404
D2005.4.1	WBGene00008399	D2005.4		15.6533	9.3	7.83	8.17	12.4467	9.35667	6.48667	9.54333	0.444667	0.00152576	0.000377936
D2023.5.1	WBGene00008409	mpst-1	Putative thiosulfate sulfurtransferase mpst-1	18.8933	12.5067	9.49667	8.25667	14.5533	11.4733	8.69667	9.76667	0.283901	0.000372105	0.000775567
D2092.4.1	WBGene00017065	D2092.4		6.64	1.65	1.83667	2.08	5.69667	1.87	1.67667	2.02333	0.652503	4.60664e-05	0.022395
E02H1.2.1	WBGene00008456	eral-1	Uncharacterized GTP-binding protein E02H1.2	16.69	12.1567	7.4	5.46	14.2033	11.89	6.97667	6.43333	0.413981	1.90071e-07	0.0317273
E04F6.15.1	WBGene00017131	E04F6.15		6.97	2.97667	2.55667	1.25333	7.49	4.25667	2.55333	1.33667	0.324709	2.03763e-06	0.00881006
EEED8.9.1	WBGene00017137	pink-1	Serine/threonine-protein kinase pink-1, mitochondrial	14.9633	11.8267	9.83	8.14	12.81	11.1433	8.35333	9.26667	0.264165	0.000325637	0.000124422
F01D4.5b.1	WBGene00008488	F01D4.5		19.09	19.5567	16.8433	10.7967	18.9833	19.3433	13.8167	12.2267	0.621482	0.000107622	0.0314429
F01F1.6.2	WBGene00000115	alh-9	Putative aldehyde dehydrogenase family 7 member A1 homolog	11.0233	5.33333	3.62333	2.46667	11.82	6.02333	3.3	3.34667	0.243949	2.96575e-09	0.0440458
F07A5.7a.2	WBGene00006754	unc-15	Paramyosin	5.71	1.86667	2.19667	1.89667	5.69333	1.97333	1.54	2.28667	0.944696	0.00144321	0.00805714
F07G6.10.1	WBGene00045271	F07G6.10		10.46	5.29	4.43	3.56	10.7533	5.60667	3.92333	3.35333	0.955827	1.0367e-07	0.0013265
F08B4.1b.1	WBGene00000994	dic-1	DICE1 (Deleted In Cancer) homolog	8.00667	6.04333	4.85667	3.66667	5.9	5.87	4.16	3.79667	0.146467	0.00100241	0.000446766
F08B6.4b.1	WBGene00006819	unc-87		76.28	18.1333	20.99	18.87	79.8467	22.6467	16.89	20.42	0.830771	1.81156e-05	0.0101566
F08F3.2a.1	WBGene00017261	acl-6	Probable glycerol-3-phosphate acyltransferase, mitochondrial	19.7	12.4767	11.0433	9.85333	15.3233	13.6433	8.79	10.4367	0.367689	0.00352165	0.000510911
F09B12.3.1	WBGene00008607	F09B12.3	Putative phospholipase B-like 2	11.1367	6.47	7.29667	3.62	11.2133	8.84333	5.95333	5.06667	0.26126	4.24754e-06	0.0019332
F09F7.2a.1	WBGene00003371	mlc-3	Myosin, essential light chain	36.14	9.08333	8.83333	9.49667	35.4133	9.73	8.59333	8.14667	0.862864	1.63481e-06	0.0179341
F09F7.4a.1	WBGene00017301	hach-1	3-hydroxyisobutyryl-CoA hydrolase, mitochondrial	27.4	12.1733	10.94	8.52667	18.2467	12.6933	9.53	8.07667	0.254906	0.00175605	0.0146269
F09F7.4b.1	WBGene00017301	hach-1	3-hydroxyisobutyryl-CoA hydrolase, mitochondrial	14.8067	6.51	6.05	3.72667	10.8567	6.47333	4.10333	4.74667	0.340634	0.000975227	0.0293875
F09G8.3.1	WBGene00017319	mrps-9	Probable 40S ribosomal protein S9, mitochondrial	19.14	11.74	10.72	9.23333	14.6167	12.2633	8.71667	10.1933	0.222999	0.000423313	0.000387499
F10C2.6.1	WBGene00001095	dars-2	Aspartyl(D) Amino-acyl tRNA Synthetase	8.13667	4.95	4.21667	4.27333	7.12333	5.47	4.05333	4.98	0.973688	5.47514e-05	0.00947949
F10E9.11.1	WBGene00017360	F10E9.11		37.56	34.22	30.6633	20.82	37.4267	33.13	23.6	20.7967	0.165014	4.54313e-06	3.24129e-05
F10E9.5.1	WBGene00017357	F10E9.5		27.58	26.5933	20.15	12.5333	27.0933	24.5833	16.21	14.5133	0.39544	5.79638e-06	0.00663879
F11C3.3.1	WBGene00006789	unc-54	Myosin-4	12.0167	2.49	2.03	3.15	10.49	3.41	2.72667	2.01667	0.838792	0.000407788	0.00560005
F11C3.3.2	WBGene00006789	unc-54	Myosin-4	28.5333	5.42333	6.23333	6.29333	35.9667	6.16	5.67	4.89667	0.605772	2.31379e-05	0.0386071
F11G11.7.1	WBGene00001027	dnj-9	DNaJ domain (Prokaryotic heat shock protein)	14.39	10.4933	8.33667	7.2	11.7233	10.97	7.58667	8.44667	0.581471	0.000540131	0.000464682
F12A10.8.1	WBGene00017397	F12A10.8		3.94	5.16333	4.05333	1.43	3.01667	3.94333	2.48	3.09	0.157812	0.00321457	1.73544e-05
F13A2.4.1	WBGene00017413	F13A2.4		6.41333	3.19667	2.89333	3.29333	5.57	3.15	2.49667	3.59667	0.57207	0.000357057	0.0029654
F13B10.2a.1	WBGene00004414	rpl-3	60S ribosomal protein L3	39.53	18.1733	21.5767	19.2633	25.9567	16.4433	17.36	28.0367	0.297136	0.00299861	0.011633
F13D12.6.2	WBGene00008741	F13D12.6	Uncharacterized serine carboxypeptidase F13S12.6	71.8367	90.5567	54.85	11.5867	61.1333	86.0267	19.2867	3.00667	0.134883	0.000157412	0.006488
F13G3.7a.1	WBGene00008767	F13G3.7		6.23333	4.20667	2.53667	1.71	5.25333	4.51	2.32667	1.93333	0.725712	0.000116044	0.0244538
F13H8.10b.1	WBGene00000259	bpl-1	Biotin Protein Ligase	2.85	2.12	1.57	0.96	3.32667	2.05333	1.49	1.62667	0.118509	3.28189e-06	0.000830728
F13H8.3.1	WBGene00017436	F13H8.3		22.48	17.51	17.2467	9.81667	24.2	17.5733	13.02	8.98667	0.468195	3.81368e-06	0.000634328
F14B4.3.1	WBGene00008781	rpoa-2	DNA-directed RNA polymerase subunit beta	24.6667	17.5867	12.4567	10.64	19.79	17.4933	11.9867	13.5733	0.625418	0.000121389	0.000970618
F15A4.11.1	WBGene00044323	tag-281		8.76667	6.39333	4.52333	3.50333	7.36	6.64667	4.20333	3.81667	0.520664	1.89944e-05	0.00632241
F19F10.11a.1	WBGene00017607	F19F10.11		10.6467	8.23	5.78667	5.39667	9.26667	8.05333	5.76333	6.91333	0.982345	0.00299395	0.000753619
F20D12.1b.1	WBGene00017641	csr-1	Chromosome-Segregation and RNAi deficient	34.5	20.31	15.7067	15.62	25.5533	22.4567	15.5667	18.66	0.607218	0.000346725	3.16971e-05
F20H11.3.1	WBGene00003162	mdh-2	Probable malate dehydrogenase, mitochondrial	10.2133	6.82	5.38	5.35	8.42667	6.27667	4.96333	5.14667	0.21068	0.000386819	0.000454851
F21A3.5.1	WBGene00008995	prde-1	piRNA biogenesis factor prde-1	6.12333	3.49333	2.87667	2.94667	4.85667	3.50333	2.80667	4.37667	0.945647	0.00123091	0.000800574
F21C3.4a.1	WBGene00004324	rde-2		10.1433	6.93333	5.67667	5.25	8.04667	7.27667	5.71	5.82333	0.568881	0.000498618	0.000798767
F21F3.4.1	WBGene00017674	F21F3.4		3.24667	2.22667	1.46667	1.35333	3.13333	2.36333	1.43	1.76333	0.552365	8.00161e-06	0.022321
F21H12.5.1	WBGene00001402	fbf-2	Fem-3 mRNA-binding factor 2	8.69333	6.24667	4.85333	4.42333	6.50667	6.16333	4.32	6.17333	0.592976	0.00351686	2.89977e-05
F22B7.5a.1	WBGene00001028	dnj-10	DnaJ homolog dnj-10	5.66333	3.74667	3	2.82	4.91	4.21667	2.59667	3.34667	0.909827	0.000728083	0.0047931
F22F7.1b.2	WBGene00017719	ldp-1	Lipid droplet localized protein	7.75667	4.09667	6.71	3.62	6.8	4.17333	4.79667	4.52667	0.525226	0.021618	0.000420511
F22F7.8.1	WBGene00194908	F22F7.8		6.73667	2.76333	2.32	3.39667	5.09333	4.11333	2.69667	4.73667	0.338853	8.32934e-05	0.0349604
F23D12.11.1	WBGene00194674	F23D12.11		269.757	220.777	230.907	127.697	289.013	234.29	182.637	82.1133	0.283899	3.20531e-06	0.00260639
F25B4.1.1	WBGene00017765	gcst-1	Aminomethyltransferase	20.27	11.4933	10.12	9.69	16.2833	11.8433	9.99	12.0267	0.726707	0.000162647	0.000814291
F25B4.1.2	WBGene00017765	gcst-1	Aminomethyltransferase	4.78	2.90667	2.78333	2.13667	4.06	3.67	2.27	2.48333	0.905953	0.000180458	0.0240715
F25G6.9.1	WBGene00017800	F25G6.9		16.8933	9.9	6.47333	5.65667	12.82	9.65	5.87333	6.86	0.431414	0.000280237	0.00218466
F26A3.3.1	WBGene00001214	ego-1	Enhancer of Glp-One (Glp-1); RNA-directed RNA polymerase related EGO-1	18.51	11.5633	9.16333	9.08	15.2867	11.5833	8.11333	11.3167	0.631463	0.000343142	0.00025243
F26B1.2a.1	WBGene00017816	hrpk-1	Heterogeneous nuclear RibonucleoProtein (HnRNP) K homolog	9.61333	5.18333	3.87	4.42333	5.91	4.51667	4.01333	4.21333	0.121233	0.00503158	0.0148778
F26E4.10a.1	WBGene00009163	drsh-1	Ribonuclease 3	16.57	14.7967	10.9233	7.79	15.1767	14.6567	9.76	8.45333	0.657094	0.000670228	0.000807465
F26H11.2b.1	WBGene00009180	nurf-1	Nucleosome-remodeling factor subunit NURF301-like	6.00667	3.99333	2.78333	2.28667	4.83333	4.12	2.54667	2.28667	0.476377	0.000666733	0.00537803
F28B3.9.1	WBGene00017888	acl-11	ACyLtransferase-like	7.07333	5.62	4.63	3.78	6.04667	6.19	4.23667	3.83333	0.675568	0.00315793	0.00256471
F28B4.3.2	WBGene00017892	F28B4.3		23.0767	22.9333	22.1167	11.0533	20	38.4567	23.1967	4.65333	0.41107	2.28081e-05	0.00276419
F28C6.7b.1	WBGene00004440	rpl-26	60S ribosomal protein L26	30.5033	16.12	13.05	12.9567	21.8667	16.8767	12.0133	16.6267	0.458379	0.000336896	0.00035509
F28H1.2.1	WBGene00000779	cpn-3	CalPoNin	31.9733	11.1933	13.3633	10.5633	32.64	12.37	11.49	11.7633	0.866622	7.70091e-07	0.00187388
F29C12.4.2	WBGene00009246	gfm-1	Elongation factor G, mitochondrial	25.7667	16.0267	14.2833	12.4867	19.8533	16.0567	11.0367	13.24	0.212411	0.00162383	0.000325089
F29G6.3a.1	WBGene00009259	hpo-34		31.64	20.1633	15.2467	10.5167	29.41	26.28	12.6133	13.9233	0.397826	3.58323e-07	0.000837679
F31C3.2b.1	WBGene00009284	F31C3.2		18.99	15.55	11.0633	9.16	16.1233	14.74	9.25333	11.0233	0.468103	0.00116085	5.14051e-05
F31C3.5.1	WBGene00009287	psf-2	Probable DNA replication complex GINS protein PSF2	25.5167	25.25	16.7267	13.93	25.4033	24.1033	15.3633	15.6467	0.850786	1.29313e-05	0.000465768
F32D8.12a.2	WBGene00009334	F32D8.12		21.1133	11.0467	7.21333	7.22667	18.69	9.95	6.29	5.63333	0.367505	0.000117419	0.0313067
F32G8.4.1	WBGene00009340	best-14	Bestrophin homolog 14	18.93	11.5033	13.2133	9.99667	18.1533	13.79	10.65	9.65333	0.593041	1.06679e-06	0.0403331
F32H2.10.1	WBGene00009346	F32H2.10		20.9867	20.2067	15.01	11.7867	21.4467	21.09	13.6467	12.1733	0.921235	6.19368e-06	0.0296612
F33D4.5.1	WBGene00017997	mrpl-1	Mitochondrial Ribosomal Protein, Large	31.4733	21.5367	17.15	13.5867	27.4	21.6667	13.8867	14.11	0.234663	3.94267e-06	0.0167681
F35C5.9.1	WBGene00009397	clec-66	C-type LECtin	6.36667	10.1967	7.66333	3.13	5.09333	9.09333	5.83667	3.08333	0.154595	0.0001339	0.000327749
F35F10.5.1	WBGene00018055	F35F10.5		3.47333	2.67333	2.63	1.38667	2.8	3.29667	1.64333	0.8	0.181269	0.000670253	0.006053
F35H10.6.1	WBGene00018071	F35H10.6		29.0167	23.2133	17.28	15.8533	26.95	23.0333	16.1933	18.2767	0.851149	2.22179e-05	0.0110705
F36H1.2i.1	WBGene00006490	kdin-1	KiDINs220 (Vertebrate scaffold protein) homolog	5.54	4.39333	3.16	2.51667	3.73333	4.39	2.54667	2.8	0.134608	0.00127506	3.49385e-05
F37A8.4.1	WBGene00003748	nlp-10	Neuropeptide-Like Protein	6.26	4.46667	4.04	3.45667	5.14	5.87	3.69	3.73	0.88574	0.00208673	0.00580366
F37F2.2.2	WBGene00018159	F37F2.2	Probable signal recognition particle 19 kDa protein	23.6767	16.6	10.5633	12.26	24.55	15.4667	11.3733	13.21	0.854095	0.0018641	0.0218875
F38B2.4a.1	WBGene00009531	F38B2.4	Adenylate kinase isoenzyme 1	10.56	2.90667	3.16333	3.15333	11.71	4.31667	3.37	3.98333	0.167795	5.25624e-07	0.0115065
F38B7.5.1	WBGene00001110	duo-1	Deubiquitylating with USP/UBP and OTU domains	8.00333	6.12	4.65667	4.12	6.96	6.44333	4.33667	5.21667	0.97847	0.00304436	1.77587e-05
F38H4.8a.2	WBGene00001151	ech-2	Enoyl-CoA Hydratase	9.10667	3.85667	2.96667	2.73667	7.22667	4.33667	2.77333	3.41333	0.663263	1.13817e-05	0.00824796
F39H11.1.1	WBGene00009565	F39H11.1		36.4467	31.8167	22.8133	16.3233	34.4667	30.5733	20.14	17.8633	0.492125	2.28149e-06	0.0282534
F40E10.3.1	WBGene00000822	csq-1	Calsequestrin	42.2233	9.05333	7.69667	6.88667	36.9767	10.3067	5.48667	7.03667	0.54487	2.59939e-07	0.0182312
F40F4.6b.1	WBGene00018237	irg-7		25.9767	35.4	27.99	9.51	21.94	60.89	37.7367	8.66333	0.103445	0.000163707	0.00346667
F40F8.4.1	WBGene00009577	F40F8.4		7.30333	4.02	2.55667	2.74333	6.48667	5.55	3.41333	3.46667	0.313857	0.000533976	0.00492015
F40F9.9.1	WBGene00000172	aqp-4	AQuaPorin or aquaglyceroporin related	4.39667	2.97	1.96	1.06667	3.18667	3.70333	1.62333	1.09667	0.45348	6.59487e-06	0.0176202
F41H10.10.1	WBGene00002032	htp-1	Him-Three Paralog	42.2133	28.3633	23.5133	20.55	32.7367	26.1233	19.71	27.39	0.214503	5.11335e-05	0.000182813
F42H10.7b.1	WBGene00018371	ess-2	Splicing factor ESS-2	15.5733	13.0167	9.37333	5.17333	13.6033	13.04	7.29333	5.32	0.369686	6.4614e-05	0.00297421
F43D9.5.1	WBGene00006395	taf-11.3	TAF (TBP-associated transcription factor) family	10.1067	9.41667	5.27667	4.4	9.26333	7.67333	4.62333	4.85333	0.226412	1.72062e-05	0.00121674
F45G2.3.1	WBGene00009731	exo-1	EXOnuclease	15.0233	12.53	10.0233	7.93333	12.8433	12.4833	7.79333	8.39	0.202154	0.000177385	0.000130586
F45H11.8.1	WBGene00189958	F45H11.8		37.4433	35.84	28.49	20.0967	37.8167	32.52	21.5833	19.7467	0.143209	7.71255e-06	0.00943622
F46B6.3b.1	WBGene00004882	smg-4	Suppressor with Morphological effect on Genitalia	16.6233	12.1933	10.53	8.62333	13.9733	12.0667	8.96333	7.87333	0.122554	9.11878e-05	0.00177524
F46E10.1a.1	WBGene00018488	acs-1	Fatty Acid CoA Synthetase family	9.98667	8.12667	5.91667	1.77	9.75667	9.69333	4.28333	1.23667	0.719824	1.77941e-07	0.0165687
F46E10.1c.1	WBGene00018488	acs-1	Fatty Acid CoA Synthetase family	9.84333	8.21	6.48	2.93667	10.7533	9.17333	3.88	1.15667	0.439374	1.47838e-05	0.0040652
F46F11.10.1	WBGene00018513	F46F11.10		5.61	4.24667	3.35667	2.99	5.00333	4.40333	3.63667	3.85	0.414902	3.94505e-05	0.00116398
F46F11.2.1	WBGene00000473	cey-2	C. Elegans Y-box	537.62	394.713	285.803	232.793	419.063	380.34	228.257	231.443	0.223978	0.00119036	0.000413819
F46F11.9b.1	WBGene00018512	trpp-8	TRansport Protein Particle	5.13333	3.20667	2.19333	2.34	4.48667	3.06333	2.56667	2.80667	0.975232	0.00265573	0.00154416
F46F2.3.1	WBGene00009787	F46F2.3		26.46	8.20667	3.64	1.1	31.5267	6.47667	1.96333	1.39667	0.602675	1.14193e-11	0.0083269
F49D11.9b.1	WBGene00018632	tag-296		19.4433	17.7033	14.9567	9.93333	16.3933	16.11	12.7367	11.18	0.257483	0.00266347	0.0103385
F52C9.7.2	WBGene00003391	mog-3	Masculinisation Of Germline; Sex determining protein MOG-3	23.09	18.0933	14.5633	11.7667	21.15	15.75	12.3133	15.1733	0.659245	0.00995306	0.00733525
F52C9.8b.1	WBGene00004095	pqe-1	Putative RNA exonuclease pqe-1	4.83	3.67333	2.39667	2.11	4.15	3.57667	2.12	2.86667	0.852594	0.00408347	0.0100973
F52H3.2.1	WBGene00009944	mtcu-2	Protein MTO1 homolog, mitochondrial	14.9633	10.8133	8.27333	7.04	12.72	11.0433	7.47667	8.82333	0.791018	0.00143649	0.000372234
F53A3.3b.1	WBGene00004491	rps-22	Ribosomal Protein, Small subunit	14.5967	8.23667	6.23	5.24667	11.6467	8.42	5.60667	5.85	0.522652	0.000621772	0.000535374
F53E10.6.1	WBGene00018762	F53E10.6	RRP15-like protein	23.65	19.4267	15.0933	11.36	23.7933	17.73	13.16	12.1533	0.580126	2.73211e-05	0.0101963
F53F10.8.1	WBGene00044423	F53F10.8		5.36	4.45333	3.85667	2.59667	4.93	4.89	2.69	2.66	0.368388	8.69095e-05	0.00502238
F54C1.7.1	WBGene00003934	pat-10	Paralysed Arrest at Two-fold; Troponin C	393.84	82.4133	87.9767	76.1167	383.62	78.33	65.5233	73.9967	0.533116	7.89874e-10	0.0455632
F54C9.6a.1	WBGene00010042	bcs-1	BCS1 (Mitochondrial chaperone) homolog	12.3233	9.03667	7.37667	5.56667	10.6467	8.18333	6.04	6.61667	0.260386	7.62119e-05	0.000626257
F54C9.6b.1	WBGene00010042	bcs-1	BCS1 (Mitochondrial chaperone) homolog	12.3233	9.03667	7.37667	5.56667	10.6467	8.18333	6.04	6.61667	0.260386	7.62119e-05	0.000626257
F54F3.1c.1	WBGene00003738	nid-1	NIDogen (Basement membrane protein)	7.86	6.65	5.64333	2.20667	6.83333	7.44	4.52333	2.09333	0.32764	2.38467e-07	0.00280634
F55A11.4a.2	WBGene00010077	F55A11.4		7.49333	5.44667	4.31	4.03	5.16333	5.39667	3.70667	4.01333	0.113227	0.0054078	0.000628449
F55B12.3a.1	WBGene00004767	sel-10	F-box/WD repeat-containing protein sel-10	19.0733	14.4833	11.2467	8.07333	13.4333	14.16	10.28	8.09	0.271277	0.00840055	0.0015447
F55E10.6.2	WBGene00018885	drd-5	Dietary restriction down regulated	5.57	3.06667	3.74333	1.27667	2.95333	4.7	2.73667	1.52	0.199236	0.000104311	0.0100317
F55F3.2b.1	WBGene00010116	F55F3.2	Carboxylic ester hydrolase	10.5433	12.8533	6.25	2.24	13.3433	11.7533	3.96	2.24333	0.840997	1.14819e-07	0.00997413
F55G1.5.1	WBGene00018901	slc-25A18.2	SLC (SoLute Carrier) homolog	6.33333	3.31	2.57667	2.66	5.09	3.29	2.48	3.76667	0.8599	9.56589e-05	0.00290966
F55G1.9.2	WBGene00018904	F55G1.9	Putative pyrroline-5-carboxylate reductase	13.37	8.92667	6.84667	6.66333	10.6867	8.91667	6.67	7.66667	0.540836	0.000741327	0.000156724
F55H2.6.1	WBGene00000550	clu-1	Clustered mitochondria protein homolog	22.2533	14.8133	10.7933	8.33333	17.0433	14.64	9.85667	9.03667	0.313671	0.000213329	0.00132038
F56D1.4a.1	WBGene00000548	clr-1	Receptor-type tyrosine-protein phosphatase	5.55667	5.27333	3.60333	2.48667	4.72	4.94667	3.58667	2.17	0.409976	0.00116432	0.00150906
F56D12.1a.3	WBGene00000112	alh-6	ALdehyde deHydrogenase	16.8067	8.19	6.70333	7.08667	12.7667	9.02667	6.07333	6.46667	0.254979	5.76045e-05	0.000436727
F56F11.4a.2	WBGene00018991	F56F11.4		17.8967	13.93	10.32	8.82333	14.9067	12.2767	7.64	8.61	0.187834	0.00357461	0.00056319
F57A10.3.1	WBGene00001813	haf-3	HAlF transporter (PGP related)	14.81	10.69	8.72667	7.22333	11.64	11.0733	7.26667	8.09333	0.309535	0.00062852	8.40243e-05
F57B10.3a.1	WBGene00019001	ipgm-1	2,3-bisphosphoglycerate-independent phosphoglycerate mutase	4.02	1.33333	1.45	1.21667	3.70333	1.62	1.3	1.89	0.618986	7.9369e-06	0.00437183
F57C2.5c.1	WBGene00010197	F57C2.5		13.0967	8.12	6.48	6.53333	10.3033	9.82333	7.33	8.1	0.616641	0.000496941	0.0236428
F57C9.4c.1	WBGene00019011	F57C9.4		19.0267	15.5533	11.1267	8.4	18.6233	16.3567	9.88	10.53	0.718597	5.46277e-06	0.00138986
F57F4.3.1	WBGene00001581	gfi-1	GEI-4 (Four) Interacting protein	10.8167	6.55667	4.29333	1.59667	9.55333	11.8567	4.36	1.00667	0.177471	1.77357e-07	0.00322872
F57F4.4.2	WBGene00019017	F57F4.4		24.0167	13.4867	8.21	3.27667	19.93	23.7533	9.49333	1.97	0.295931	4.53517e-07	0.0166199
F58G11.5.3	WBGene00006442	tag-65	SR-related CTD associated factor 6	15.8733	11.8533	9.47667	8.36333	13.2	11.6233	8.36	10.1533	0.554865	0.00238753	0.000326817
F58H1.8.1	WBGene00138720	F58H1.8		13.1533	10.72	8.69667	6.55667	11.11	10.0767	7.57667	8.25667	0.372251	0.000153753	0.00970472
F59A2.3.1	WBGene00010303	cri-3	Conserved regulator of innate immunity protein 3	66.1533	40.6867	34.2633	30.5267	45.7667	39.0733	29.14	33.5267	0.206469	0.00657441	0.0207891
F59A3.2.1	WBGene00019075	F59A3.2		5.12	3.92333	3.00333	2.64333	4.4	3.73333	2.70667	2.84667	0.442865	0.0015495	0.000169344
H06I04.4b.1	WBGene00006725	ubl-1	Ubiquitin-like protein 1-40S ribosomal protein S27a Ubiquitin-like protein 1 40S ribosomal protein S27a	32.5567	15.54	12.7767	16.2967	26.2	18.6433	12.08	17.0733	0.697897	0.000220855	0.000172041
H12C20.2a.1	WBGene00004064	pms-2	PMS (Post Meiotic Segregation) family	14.2633	12.0833	8.46667	5.38	11.78	12.1433	7.33333	7.01333	0.635508	0.000576748	0.000148521
H12I13.4.1	WBGene00001401	fbf-1	Fem-3 mRNA-binding factor 1	8.33333	7.01	5.40667	4.40333	6.39	6.63667	4.91	6.22667	0.576018	0.00582699	3.62176e-06
H20J04.4b.2	WBGene00019219	H20J04.4		10.08	5.99333	5.13333	4.99333	7.72	6.78	5.03667	5.95	0.784483	0.00372011	0.0236572
H20J04.8.1	WBGene00003390	mog-2	Probable U2 small nuclear ribonucleoprotein A'	33.26	21.6867	17.6567	15.5567	26.97	22.8633	15.37	18.2667	0.485732	0.000118075	0.0111925
H28O16.2.1	WBGene00010420	mcrs-1	MCRS1 (Microtubule-binding MiCRoSpherule Protein 1) homolog	13.7	9.55	7.13667	6.62667	11.0733	9.28667	6.31333	7.43333	0.387424	0.000741766	0.000443822
H35B03.2d.1	WBGene00019264	H35B03.2		7.53667	5.10333	3.25333	3.39333	5.66333	5.36	3.08667	3.50667	0.400268	0.000520488	0.031732
JC8.5a.1	WBGene00010437	cox-11	Cytochrome OXidase assembly protein	14.6767	8.76	7.11667	6.57	11.05	9.27	6.2	7.38667	0.407117	0.00128918	0.00684255
K01C8.7a.1	WBGene00010459	slc-25A32	SLC (SoLute Carrier) homolog	7.13	6.11	4.94333	3.97	6.75667	5.55667	3.99333	4.93667	0.528677	0.000426802	0.0405575
K01D12.6.1	WBGene00010465	K01D12.6		11.7267	9.05333	6.85667	5.53667	8.68333	8.88333	5.73333	5.40333	0.150002	0.00130252	0.000655205
K01G5.2c.1	WBGene00001996	hpl-2	Chromo-domain protein; HP1 Like (Heterochromatin protein)	3.27	2.79667	2.34333	1.67667	2.82667	2.78333	1.95	2.3	0.797272	0.0105077	0.000418436
K02A4.1.1	WBGene00001149	bcat-1	Branched-chain-amino-acid aminotransferase, cytosolic	25.7433	21.5733	17.33	14.2233	22.7133	25.7033	13.4967	9.22	0.159721	1.28315e-05	0.00666563
K02B12.5.1	WBGene00010498	K02B12.5		6.82	5.55	3.7	2.94667	5.80333	5.58333	3.78333	3.57	0.875867	0.000518102	0.000477516
K02B12.8a.1	WBGene00006976	zhp-3	Zip (Yeast meiotic zipper) Homologous Protein	12.3967	8.82	7.01667	5.24333	10.0667	8.96	5.40333	5.79	0.214464	5.17148e-05	0.000141538
K02B12.8b.1	WBGene00006976	zhp-3	Zip (Yeast meiotic zipper) Homologous Protein	3.98	3.18667	2.15667	1.51667	3.43333	3.08333	1.89	1.57333	0.463052	0.000348316	0.0232055
K02C4.3a.1	WBGene00010502	K02C4.3	Probable ubiquitin carboxyl-terminal hydrolase K02C4.3	19.1067	19.9267	14.2867	8.39	16.7833	17.8733	9.76333	5.64333	0.117956	0.000855332	0.000604666
K03A1.5.2	WBGene00006351	sur-5	Acetoacetyl-CoA synthetase	8.52333	4.95333	3.05667	2.98333	7.30667	5.39667	3.64333	4.41667	0.509654	2.27541e-05	0.0184512
K04F10.6a.1	WBGene00003499	mut-2	MUTator	22.3567	19.8633	15.47	11.2333	21.02	19.79	13.07	12.8733	0.649381	0.000113295	3.07622e-05
K04G2.11.1	WBGene00010569	scbp-2	SECIS (SeCis) Binding Protein homolog	19.2667	20.7267	17.72	10.8433	20.42	19.86	11.8367	10.9833	0.298209	0.000302057	0.00831146
K06H7.6.1	WBGene00000143	apc-2	Anaphase-promoting complex subunit 2	18.3767	12.3733	9.48667	7.67	15.6633	13.13	8.85667	9.76333	0.898574	7.30003e-05	0.00153653
K07A1.10.1	WBGene00010616	K07A1.10		26.0233	16.06	12.1967	10.1967	21.5967	14.8433	10.6833	12.3733	0.227345	8.63007e-07	0.0158642
K07H8.3.1	WBGene00000923	daf-31	N-alpha-acetyltransferase daf-31	70.3	54.82	44.7867	35.0233	55.6067	56.4067	35.6767	36.5567	0.171127	0.000278433	0.00117249
K07H8.9.1	WBGene00019509	K07H8.9		4.16667	4.13667	2.25667	1.69	2.89333	3.71667	2.07333	2.8	0.656121	0.020536	0.00216398
K08D10.2a.1	WBGene00001033	dnj-15	DNaJ domain (Prokaryotic heat shock protein)	23.99	20.17	15.9867	13.62	24.2033	19.74	13.3933	14.1967	0.528011	2.05322e-06	0.0239227
K08D12.3a.1	WBGene00019537	K08D12.3		125.123	81.1733	59.9433	50.2067	129.243	77.9	50.2433	58.4867	0.97591	6.34162e-08	0.00464121
K10C2.12.1	WBGene00206386	K10C2.12		6.30667	4.18667	5.26333	3.06667	6.40333	5.41	4.37667	2.56667	0.97571	0.00354645	0.0194492
K11D2.5.1	WBGene00010771	K11D2.5		2.77333	1.69333	1.15333	1.01333	2.46	1.50333	1.23667	1.53667	0.905855	0.00123225	0.0049033
K11H3.4.1	WBGene00010781	K11H3.4		6.19667	5.55	4.35333	3.11667	5.28	5.57	3.68667	3.85333	0.637517	0.00465951	0.000245463
K12D12.5.1	WBGene00010787	K12D12.5		6.56667	5.13333	3.68	3.35333	5.7	5.66667	3.58667	3.94333	0.915734	0.000535656	4.76292e-05
K12F2.1.1	WBGene00003515	myo-3	Myosin-3	8.46333	1.7	2.31667	3.01667	10.7867	3.37667	3.24333	4.76667	0.131258	0.000793478	0.0190082
LLC1.2a.1	WBGene00010793	LLC1.2		52.7267	72.3533	80.48	26.1733	59.62	120.063	71.7767	23.4033	0.179166	8.57073e-05	0.0345131
LLC1.3a.1	WBGene00010794	dld-1	Dihydrolipoyl dehydrogenase, mitochondrial	28.84	15.9067	11.66	9.55333	21.29	14.9233	9.32667	10.4767	0.163697	5.96665e-05	0.00163595
M01E11.4b.1	WBGene00019713	pqn-52	Prion-like-(Q/N-rich)-domain-bearing protein	7.25333	3.11	1.87333	2.56667	6.10333	2.62	1.67333	2.43	0.179275	4.39416e-07	0.00147607
M01E11.5.2	WBGene00000474	cey-3	C. Elegans Y-box	96.6767	67.3833	52.6967	38.15	84.1367	63.3067	39.9033	41.9433	0.152478	3.13362e-06	0.000930494
M01E5.2.2	WBGene00010805	M01E5.2		3.52	2.07333	1.69667	1.70667	2.44667	2.06	1.18	1.96	0.159688	0.00201436	0.000508824
M02D8.1.1	WBGene00019727	zig-12	2 (Zwei) IG domain protein	34.3733	7.92	8.69333	6.68333	31.7233	9.47667	7.19	7.37667	0.815132	4.20547e-07	0.00919214
M02F4.7.1	WBGene00019738	clec-265	C-type LECtin	20.5567	37.4333	26.4733	6.94	26.1867	46.1167	21.3433	3.05	0.677345	1.05774e-05	0.0384031
M02F4.8.1	WBGene00000175	aqp-7	AQuaPorin or aquaglyceroporin related	24.18	8.26667	7.05333	8.76333	20.99	9.54667	5.95	13.0667	0.850332	4.33335e-05	0.0300107
M04B2.4.1	WBGene00010847	M04B2.4		10.0133	6.05333	4.45333	3.96667	8.18	6.24667	4.25	4.72667	0.606038	3.26203e-05	0.00970376
M04F3.5a.1	WBGene00019771	M04F3.5		9.63333	9.49333	6.19667	4.61333	9.46667	8.75333	7.01667	6.17667	0.71019	0.0256881	0.00277675
M176.2.1	WBGene00010941	gss-1	Glutathione synthetase	24.5267	18.31	15.75	13.3633	22.22	18.44	13.4067	14.1167	0.366362	3.33207e-05	0.000997927
M6.1a.1	WBGene00002056	ifc-2	Intermediate filament protein ifc-2	3.67333	2.86333	2.62333	1.49333	4.07667	3.40667	1.65667	1.28667	0.779788	2.2644e-06	0.00121874
M6.1d.1	WBGene00002056	ifc-2	Intermediate filament protein ifc-2	19.7933	17.4567	13.1167	6.71667	21.5633	18.1533	8.44667	4.62667	0.403385	2.48215e-06	0.0148054
M88.2.1	WBGene00010905	mrps-34	Mitochondrial Ribosomal Protein, Small	19.2733	13.6733	10.9267	9.11333	15.7267	13.8	9.37667	10.1	0.301164	9.76147e-05	0.000672869
R02D3.7.1	WBGene00019824	R02D3.7		24.2367	20.5367	15.59	13.2667	21	18.8	13.7533	14.84	0.2605	0.000203258	0.0087877
R02D5.8.1	WBGene00050937	R02D5.8		7.63667	5.50667	4.61	3.86	6.47333	6.45	4.17333	4.94	0.814045	0.00167071	0.003782
R03D7.1.1	WBGene00010988	metr-1	Probable methionine synthase	30.8767	24.42	17.6	15.0133	24.3267	24.53	16.74	19.5567	0.75586	0.00846176	0.000715964
R05D3.4b.1	WBGene00007008	rfp-1	E3 ubiquitin-protein ligase bre-1	15.44	10.0467	7.36333	5.49333	11.6367	10.17	6.16667	5.97333	0.318998	0.000551851	0.00289402
R06A4.8.2	WBGene00011050	agl-1	AGL (Amylo-1,6-GLucosidase, 4-alpha-glucanotransferase) glycogen debranching enzyme	8.96333	5.49	5.22667	4.99	7.45	6.1	4.49	5.85333	0.693922	0.00121742	0.00108752
R07B7.11.1	WBGene00011095	gana-1	Alpha-galactosidase	4.44667	2.91	2.42333	2	4.27333	4.04667	2.71	2.15	0.201186	0.00011845	0.042293
R07B7.5.1	WBGene00011089	kmo-1	Kynurenine 3-monooxygenase	6.15333	3.24667	3	2.82667	5.62	4.03333	2.74667	2.88	0.949853	1.44916e-07	0.002749
R07E5.13.1	WBGene00011119	mpc-1	Probable mitochondrial pyruvate carrier 1	78.3867	44.4733	41.1833	36.7467	64.8833	45.3467	32.68	35.4033	0.150151	2.26273e-05	0.0204144
R07H5.8.1	WBGene00011128	R07H5.8		37.89	23.91	21.3567	19.6833	29.3467	24.6	18.4967	23.39	0.488116	0.00670582	0.0152821
R09H10.4.1	WBGene00004228	ptr-14	PaTched Related family	3.47333	2.37	2.54667	1.83	2.91	2.96667	1.99667	1.79333	0.281316	1.25542e-05	0.0170044
R10H10.7.1	WBGene00011225	R10H10.7		10.5367	8.02667	5.95333	5.41667	9.64667	8.52	5.67667	6.99667	0.701455	0.000414834	0.000113447
R119.3.1	WBGene00020089	R119.3		26.89	16.3433	14.9267	13.6533	22.22	16.3967	12.5233	14.2133	0.266329	0.000221966	0.000627017
R12C12.1a.2	WBGene00020022	gldc-1	Glycine cleavage system P protein	5.14333	2.23667	1.58	1.46	4.09667	2.19667	1.51333	2.02667	0.541291	6.85712e-07	0.0187001
R13F6.10.1	WBGene00020068	cra-1	N-terminal acetyltransferase B complex subunit NAA25 homolog	15.8867	9.44667	8.14	8.2	11.4733	9.85	7.1	9.19333	0.275126	0.00159077	0.000195729
R186.8.2	WBGene00011309	R186.8		49.64	38.04	30.91	25.5067	45.37	38.05	27.3533	29.92	0.736281	0.000190655	0.00854349
R74.4b.1	WBGene00001034	dnj-16	DNaJ domain (Prokaryotic heat shock protein)	17.0667	13.5167	11.3933	9.08	14.91	12.71	8.67333	9.77667	0.135667	0.000126527	0.0105808
T01B11.2a.1	WBGene00020139	eppl-1	Ethanolamine-phosphate phospho-lyase homolog 1	5.89667	2.42333	2.28	1.68667	5.40333	4.65333	2.24	2.69667	0.207578	0.000895002	0.038591
T01H3.4.1	WBGene00011350	perm-1	PERMeable eggshell	14.86	11.2767	8.47667	6.88	12.14	11.4567	7.97	7.79	0.587458	0.00160165	5.56196e-05
T02D1.8.1	WBGene00011374	T02D1.8		24.7633	14.0933	15.89	12.1667	26.01	13.29	10.8533	8.37667	0.108696	2.57627e-06	0.0151698
T02E1.3a.1	WBGene00011376	gla-3		13.22	10.6533	7.54667	5.72	10.1433	9.33333	6.00333	5.37333	0.111373	0.00118668	0.000288396
T02G5.13b.1	WBGene00020169	mmaa-1	Methylmalonic aciduria type A homolog, mitochondrial	8.72333	7.07667	7.17333	3.90333	8.35	5.85667	4.28	3.79333	0.122234	0.00280113	8.71442e-05
T02G5.7.1	WBGene00020166	T02G5.7		46.5333	29.4467	27.0067	25.1167	38.47	31.2333	25.35	32.6967	0.961326	7.64858e-05	0.000474499
T02G5.8.2	WBGene00002183	kat-1	Acetyl-CoA acetyltransferase homolog, mitochondrial	30.0333	11.1233	7.94333	8.69333	19.6467	9.11667	5.9	8.95667	0.119334	0.000127376	0.00244165
T03D8.2.1	WBGene00011391	mrps-12	Mitochondrial Ribosomal Protein, Small	23.6567	12.7933	11.1133	12.0633	19.18	13.7967	9.89	13.1733	0.431163	3.56239e-05	0.0355742
T03F6.2.1	WBGene00001035	dnj-17	DNaJ domain (Prokaryotic heat shock protein)	8.81	6.92	4.90333	4.25667	8.44	6.97	5.02	5.35	0.648018	0.000144865	0.000837518
T04A11.6.1	WBGene00001865	him-6	Bloom syndrome protein homolog	12.64	8.96667	5.85	5.55	11.3233	8.96	5.47667	8.39	0.766058	0.00181711	0.00022773
T04A8.11.1	WBGene00011412	mrpl-16	Mitochondrial Ribosomal Protein, Large	22.8733	14.9733	11.3567	9.51333	19.35	13.9533	9.31	9.17667	0.198343	5.39442e-05	0.00253207
T04C12.6.4	WBGene00000063	act-1	Actin-1	32.9333	13.5767	14.6533	15.7267	33.4333	14.72	12.59	13.2533	0.794834	0.000331508	0.00242157
T05G5.6.2	WBGene00001155	ech-6	Probable enoyl-CoA hydratase, mitochondrial	78.15	36.1267	21.1167	20.12	65.5967	34.2433	18.0133	22.83	0.48083	1.29619e-05	0.0205607
T05H10.5b.1	WBGene00006734	ufd-2	Ubiquitin conjugation factor E4 ufd-2	21.72	16.37	11.0767	6.62333	18.22	15.96	9.88333	6.01667	0.40556	0.000232763	0.00134569
T07A9.2.1	WBGene00001338	ears-2	Glutamyl(E) Amino-acyl tRNA Synthetase	5.72667	4.42667	3.40667	3.1	4.7	4.05333	3.23	3.79	0.340264	0.000112544	0.000528543
T07C12.12.1	WBGene00011576	rmh-2	RMi1 (RMI1) Homolog	5.92	5.27	3.77333	3.23	5.24333	5.55333	3.74	4.03	0.765551	0.000437647	0.00312979
T07G12.10.1	WBGene00011600	zim-2	Zinc finger In Meiosis	4.30333	3.03	2.81	2.19	3.77333	3.7	2.36333	2.40667	0.945641	0.00815518	0.00395118
T07G12.11a.1	WBGene00011601	zim-3	Zinc finger In Meiosis	18.8	11.24	8.18	9.13667	13.4233	10.8833	6.94	9.57	0.177395	0.000791632	0.000524309
T07G12.12a.1	WBGene00001867	him-8	High Incidence of Males (Increased X chromosome loss)	20.11	13.24	9.89	10.1167	18.74	14.0767	9.91667	12.6433	0.479013	7.39583e-07	0.00886799
T08H10.1.1	WBGene00020369	T08H10.1		31.0333	11.6067	13.9867	11.7033	23.2133	14.72	11.7267	16.08	0.659845	1.09484e-05	0.0159045
T09A5.6.1	WBGene00007014	mdt-10	Mediator of RNA polymerase II transcription subunit 10	24.61	23.3433	19.37	13.8967	23.22	20.64	15.36	16.2867	0.309145	0.00139812	0.00176099
T09B4.9.1	WBGene00020383	tin-44	Probable mitochondrial import inner membrane translocase subunit tin-44	22.9633	14.0667	12.0567	10.91	18.8267	13.7567	10.06	12.4967	0.19631	6.43374e-06	0.0195154
T10B11.7a.1	WBGene00020403	hrde-4		10.03	7.66	6.50333	4.87333	7.90333	8.08	5.08667	6.43333	0.438507	0.000581691	0.0310216
T10B11.8a.1	WBGene00020404	T10B11.8		4.30333	3.9	2.49667	1.58	3.40333	3.3	1.85	1.22667	0.140855	0.00183793	0.00596062
T10B11.8b.1	WBGene00020404	T10B11.8		8.06	6.56667	5.17	3.68667	6.05	6.59333	4.43667	4.48667	0.318823	0.00122584	0.000356551
T10C6.10b.1	WBGene00011691	T10C6.10		6.97667	5.06	3.56333	2.86333	5.92333	4.91333	2.82	2.79667	0.35733	0.000831193	0.0108329
T10E9.1.1	WBGene00020411	T10E9.1		15.0467	11.3267	10.2267	7.94333	12.26	11.8933	7.78	8.43333	0.185958	0.000546242	0.00718326
T12A2.15b.1	WBGene00020443	esyt-2	Extended SYnapTotagmin homolog	2.52	1.82667	1.43	1.29667	2.19333	1.78333	1.42667	1.64667	0.969179	0.00197856	0.0129076
T12F5.3.2	WBGene00001601	glh-4	ATP-dependent RNA helicase glh-4	15.89	11.0067	8.21667	7.97333	13.6867	11.15	8.44	11.1367	0.733145	0.00170611	1.67404e-05
T14B4.2.1	WBGene00020499	mrps-18.C	Mitochondrial Ribosomal Protein, Small	47.83	31.16	27.73	23.6733	40.5333	34.0667	22.0567	23.7	0.182974	3.79339e-06	0.0126994
T14G10.5d.1	WBGene00011775	T14G10.5	Probable coatomer subunit gamma	9.11667	6.79333	4.02667	1.73	6.22333	6.51667	3.39333	0.99	0.240165	0.00106352	0.00564996
T14G12.3.1	WBGene00006408	tag-18		12.3967	4.22333	2.74667	1.40667	18.2933	4.72333	2.15	1.26	0.144027	1.05584e-07	0.012407
T16G1.10a.1	WBGene00004151	pqn-68	D-aminoacyl-tRNA deacylase	10.8367	9.90333	7.54667	5.71	11.2733	9.82	6.09333	6.23	0.732648	1.13681e-06	0.0070417
T17A3.13.1	WBGene00269434	sqst-5	SeQueSTosome related	2.47333	1.53667	1.88333	1.32	1.86	2.26333	1.73	1.59667	0.570498	0.00208031	0.00275196
T17E9.2b.1	WBGene00020549	nmt-1	Probable glycylpeptide N-tetradecanoyltransferase	10.44	5.97667	5.59667	4.5	7.38667	6.17	4.39	4.03333	0.172155	0.00490124	0.000715469
T20B12.1.1	WBGene00020600	trd-1	Tetratricopeptide repeat-containing protein trd-1	14.7767	8.71667	5.76667	5.35333	12.4933	8.8	5.74	7.20333	0.878171	8.34767e-07	0.0141433
T20D3.3a.1	WBGene00011857	coa-4	Cytochrome Oxidase Assembly subunits	14.77	9.20333	7.30333	7.85	11.3967	8.69667	6.41	8.40667	0.108138	3.09296e-05	0.0395493
T20H4.5.1	WBGene00020636	T20H4.5	Probable NADH dehydrogenase [ubiquinone] iron-sulfur protein 8, mitochondrial	71.6633	39.9333	37.2833	34.02	55.25	41.23	29.8233	34.54	0.112514	3.79953e-05	0.000416081
T21G5.3.1	WBGene00001598	glh-1	ATP-dependent RNA helicase glh-1	63.3767	37.9933	31.2033	34.2667	47.3433	37.22	28.2133	42.73	0.43003	0.00107191	2.38163e-05
T22A3.5a.1	WBGene00011908	pash-1	PArtner of DroSHa (DRSH-1 interactor)	8.98333	5.69	3.94333	3.16667	6.62667	5.63333	3.56667	3.36333	0.270263	0.000213536	0.00772385
T22A3.5b.1	WBGene00011908	pash-1	PArtner of DroSHa (DRSH-1 interactor)	6.83333	3.57333	2.87	2.34667	4.89	4.03667	2.25	3.05667	0.537561	0.00281323	0.0165981
T22E5.5.2	WBGene00003495	mup-2	Troponin T	28.5767	6.08	7.46	7.86333	22.6933	5.58333	5.94333	8.44667	0.427549	4.86282e-05	0.0402531
T22G5.2.1	WBGene00002259	lbp-7	Fatty acid-binding protein homolog 7	16.9567	13.8667	8.47333	5.91667	16.1233	12.8067	4.71667	3.76333	0.124677	1.68925e-05	0.00754158
T23B12.2.1	WBGene00020717	mrpl-4	Mitochondrial Ribosomal Protein, Large	21.2867	13.2933	12.0033	11.8067	17.7867	13.3067	10.54	12.5433	0.237961	3.18954e-05	0.00162116
T23F6.4a.2	WBGene00004315	rbd-1	RBD (RNA binding domain) protein	12.4167	6.84667	6.14667	4.73333	9.75	5.47	5.18	6.85	0.461337	0.00313358	0.0198874
T23F6.4b.1	WBGene00004315	rbd-1	RBD (RNA binding domain) protein	8.42333	4.57333	4.34333	4.33667	6.83667	4.59	3.68667	5.41	0.422885	1.7701e-05	0.00028567
T24H7.1.1	WBGene00004015	phb-2	Mitochondrial prohibitin complex protein 2	85.2733	46.6833	42.8367	37.44	63.2	49.0733	33.1967	38.7633	0.195358	0.000556078	0.00361778
T24H7.4.1	WBGene00020783	blos-4	Biogenesis of lysosome-related organelles complex 1 subunit 4	49.0167	51.0233	47.58	25.1267	47.4467	51.9167	35.2133	25.7133	0.202088	7.23968e-06	0.00153931
T25C12.3.1	WBGene00012018	T25C12.3		22.3167	23.3833	16.6467	5.04	19.15	38.1567	16.74	4.19	0.248314	1.1013e-05	0.00430056
T25C8.2.1	WBGene00000067	act-5	ACTin	102.483	55.69	35.89	19.2967	111.95	56.5767	20.8667	10.6833	0.356772	1.29915e-10	0.0264989
T26A5.3.1	WBGene00006463	nduf-2.2	NADH Ubiquinone oxidoreductase Fe-S protein	18.89	12.8067	8.89333	7.97333	15.2567	10.39	7.13333	8.14	0.160895	0.000576132	0.000518899
T26A5.5c.1	WBGene00020821	jhdm-1	JmjC domain-containing histone demethylation protein 1	11.16	6.90667	6.03667	5.7	8.53	7.73333	5.52	6.52	0.610444	0.00534682	0.00619106
T26A5.6.1	WBGene00020822	T26A5.6		16.5633	13.8767	10.0533	9.16	14.4067	13.5333	9.01333	9.97333	0.421399	0.00021972	0.0266942
T27A8.2.1	WBGene00012074	T27A8.2		6.34333	4.20667	2.91333	2.62	6.03	4.40667	1.99333	2.74667	0.351755	6.11988e-08	0.0340737
T27D1.1.1	WBGene00000885	cyn-9	Peptidyl-prolyl cis-trans isomerase 9	25.41	20.82	16.56	13.5267	22.2133	20.18	12.7933	14.6933	0.179308	6.17644e-05	0.000338977
T28A8.6.1	WBGene00012112	T28A8.6		14.67	11.1367	8.73333	7.89333	11.8967	11.11	7.77	9.12667	0.382587	0.000454364	0.000464999
T28D6.6a.1	WBGene00012126	T28D6.6		29.1533	20.41	15.5867	13.9233	24.7367	21.9133	12.9233	15.7333	0.572761	0.000207245	0.00026779
W02B12.10.1	WBGene00012205	W02B12.10	tRNA (guanine-N(7)-)-methyltransferase	17.47	15.0233	11.04	8.89	15.8533	15.4567	10.3367	8.99667	0.608909	3.81342e-05	0.000380151
W02B12.6a.1	WBGene00000196	aars-1	Alanine--tRNA ligase, mitochondrial	7.33333	4.51	3.07	3.04667	6.23333	4.07333	3.22	3.36333	0.492956	2.44909e-05	0.0170918
W02D3.2.1	WBGene00020932	dhod-1	Dihydroorotate dehydrogenase (quinone), mitochondrial	28.58	21.7467	17.8	14.3067	23.3867	21.47	15.3667	15.3667	0.18282	5.87924e-05	0.00116082
W02D9.4.1	WBGene00012210	W02D9.4		7.07667	5.71	4.02667	2.9	6.10333	5.38333	3.47667	2.94	0.216679	1.19327e-05	0.00073791
W02F12.4a.1	WBGene00020949	W02F12.4		5.50667	3.04	2.72333	1.92	4.87	3.43667	1.89667	2.17667	0.518645	1.59491e-05	0.0396301
W03B1.4a.1	WBGene00005662	sars-2	Seryl Amino-acyl tRNA Synthetase	16.1433	10.3333	8.21	7.45	13.0633	9.37667	7.33333	8.05333	0.239983	0.000203819	0.00447885
W03F8.3a.1	WBGene00020993	W03F8.3	Probable peptide chain release factor 1, mitochondrial	17.2667	11.06	8.36667	6.73333	13.2967	10.5233	6.61	7.99667	0.145866	1.87954e-05	0.00150688
W03F9.1a.1	WBGene00020999	W03F9.1	Zinc finger protein ZPR1 homolog	22.44	17.79	12.7333	10.94	19.3733	17.3933	11.6533	12.6433	0.621379	0.000957148	0.000556109
W04B5.4.2	WBGene00021021	mrpl-30	Mitochondrial Ribosomal Protein, Large	16.2033	8.98333	8.72333	8.47667	13.0933	9.68	7.33667	9.99667	0.568816	0.00133631	0.00025677
W04C9.4.1	WBGene00021026	W04C9.4		34.8433	23.4067	19.3933	18.8733	32.1267	23.17	16.0333	19.4567	0.353948	1.21665e-05	0.000831399
W06D4.6.1	WBGene00004298	rad-54		5.70333	4.18667	2.75333	2.84667	4.84333	4.23667	2.74667	3.59	0.95487	0.000313868	0.000249269
W07A12.7.1	WBGene00012324	rhy-1	Regulator of hypoxia-inducible factor 1	2.72	2.28	1.30667	0.793333	2.42333	2.77	1.78333	1.29667	0.111274	3.31888e-05	0.0486247
W09C5.6b.5	WBGene00004445	rpl-31	60S ribosomal protein L31	119.007	78.5867	39.0267	30.05	104	72.4533	35.21	34.6733	0.421368	7.29067e-07	0.000546117
W09D10.3.1	WBGene00012361	mrpl-12	Mitochondrial Ribosomal Protein, Large	37.83	21.4033	15.9367	12.5233	30.9167	21.3433	13.2467	11.99	0.231352	9.31631e-06	0.00475589
W09G10.9.1	WBGene00271830	W09G10.9		8.70667	6.63	5.66667	4.43333	6.94	6.60667	4.87	5.94	0.604329	0.00736595	0.0223481
W09G12.4.1	WBGene00001103	dsl-1	Delta-like protein	1.90667	2.37667	1.78333	0.823333	1.44333	2.96	2.32333	1.35333	0.217321	0.00203657	0.0392339
W10C8.5.1	WBGene00021128	W10C8.5		18.57	5.82	5.64333	6.52667	17.24	7.65	5.26	6.63667	0.961797	6.39215e-06	0.00638622
Y105C5B.5a.1	WBGene00013647	Y105C5B.5		56.16	32.81	20.0633	16.6167	65.0633	29.2933	14.4767	9.38667	0.365362	3.68991e-10	0.000325943
Y105E8A.20b.1	WBGene00013678	Y105E8A.20		6.8	4.15	3.98333	3.54667	5.77333	6.04	3.19	5.46	0.291052	0.00641556	0.000222524
Y105E8A.23a.1	WBGene00013680	rpom-1	DNA-directed RNA polymerase	9.35333	5.16333	4.22	4.53333	6.97	5.28667	3.94333	5.64667	0.477981	0.000251012	0.000231977
Y105E8A.6.1	WBGene00006824	unc-95	LIM domain-containing protein unc-95	2.95667	1.2	1.35333	1.38667	2.71333	1.30333	1.30333	1.43333	0.862914	0.000186518	0.00350378
Y110A7A.16.1	WBGene00022463	elpc-1	Elongator complex protein 1	12.0633	7.65667	4.75	5.17667	10.06	8.05333	5.47667	6.75	0.80404	0.000126815	0.0150381
Y110A7A.18.1	WBGene00004094	ppw-2	Piwi-like protein	39.04	29.05	20.6733	18.62	25.48	25.6067	17.7333	26.4933	0.263848	0.0164641	5.70585e-05
Y110A7A.19.1	WBGene00002804	let-630		13.2967	9.05667	7.13	5.88	10.4033	8.69333	5.85333	5.76	0.204428	0.000989207	0.000717968
Y111B2A.1.1	WBGene00013727	Y111B2A.1		7.46333	5.03667	4.35667	3.75667	5.94	5.19333	3.55667	4.51667	0.388556	0.000833754	6.28317e-05
Y111B2A.17.1	WBGene00013738	elpc-2	ELongator complex Protein Component	7.07333	4.16667	3.98	2.77	4.31	4.08667	2.76333	3.20667	0.147729	0.0279819	0.00432007
Y116A8C.16c.1	WBGene00004403	rom-4	Rhomboid-like protein	2.78333	2.24333	1.79	1.41667	2.08333	2.22	1.6	1.57333	0.271804	0.00386626	9.12803e-06
Y116A8C.27a.2	WBGene00013804	Y116A8C.27		20.6	11.5667	10.1567	10.3133	15.15	11.5033	8.56	11.5933	0.311598	0.00354741	0.000718275
Y119C1B.4.1	WBGene00022470	mrpl-19	Probable 39S ribosomal protein L19, mitochondrial	15.5233	11.8533	10.0933	7.92333	12.8733	12.0567	7.98333	8.44333	0.230312	0.000408129	5.62834e-05
Y18D10A.11.1	WBGene00012481	Y18D10A.11		34.11	21.5567	14.56	11.1333	24.59	19.84	11.3	9.86	0.126033	0.000319453	0.00333543
Y18H1A.6a.1	WBGene00004028	pif-1	ATP-dependent DNA helicase PIF1	2.73	2.34667	1.85333	1.38667	2.16	2.40667	1.57333	1.49333	0.363366	0.00327543	0.000555941
Y18H1A.7a.1	WBGene00004332	rec-1		5.37667	4.45667	3.40333	2.77333	4.25667	4.46667	2.58333	3.01667	0.209903	0.0011035	1.868e-05
Y22D7AL.10.2	WBGene00021248	Y22D7AL.10		38.9233	21.9133	18.3633	17.66	33.23	22.8267	15.0133	18.22	0.446227	0.000202301	0.00172929
Y22D7AL.5a.1	WBGene00002025	hsp-60	Chaperonin homolog Hsp-60, mitochondrial	37.0467	20.57	11.6333	11.5133	28.3333	21.08	12.7433	14.6267	0.662233	4.28809e-05	0.00139875
Y22D7AR.9.3	WBGene00021262	fbxa-74	F-box A protein	3.79	3.21	2.71333	1.19667	3.50667	3.29333	2.18	1.45	0.54396	3.35925e-06	0.00532506
Y22F5A.4.1	WBGene00003090	lys-1	Lysozyme-like protein 1	91.8467	89.1867	96.7433	37.6467	100.317	127.16	78.45	28.13	0.572438	5.9739e-05	0.0457543
Y24D9A.4a.1	WBGene00004419	rpl-7A	60S ribosomal protein L7a	482.533	303.323	257.82	259.55	373.987	349.693	244.457	319.967	0.881479	0.00120961	5.19994e-05
Y32H12A.2b.1	WBGene00021311	thoc-5	THO Complex (Transcription factor/nuclear export) subunit	5.6	4.07	1.99	1.11667	5.28333	3.07	1.87	2.29	0.906656	0.000932653	0.00174698
Y34B4A.6.1	WBGene00021322	Y34B4A.6		49.88	76.96	68.9967	23.4933	56.8633	120.643	62.5467	18.23	0.261288	0.000118435	0.0205211
Y37A1C.1h.1	WBGene00012543	nkcc-1	Na-K-Cl Cotransporter homolog	5.01667	4.02	2.82333	2.62333	3.52333	4.1	3.07667	2.32667	0.401491	0.0253348	0.000547558
Y37D8A.21.1	WBGene00012558	rbm-7	RNA Binding Motif protein homolog	19.3467	15.1567	10.1933	8.65	16.2133	14.3933	8.77	9.67	0.421101	0.000702836	0.00969396
Y37E3.17a.1	WBGene00021355	Y37E3.17		35.34	22.3133	16.58	16.9567	29.28	23.54	15.6467	21.6733	0.889758	0.00015799	4.50781e-05
Y38H8A.7.1	WBGene00012640	Y38H8A.7		16.08	13.6267	9.58667	5.30667	13.4033	13.16	8.08667	7.07667	0.318391	1.39375e-06	0.0118042
Y39A1A.20.1	WBGene00012657	Y39A1A.20		3.87667	3.32	2.63333	1.87333	2.60333	2.96667	1.95	3	0.212405	0.0199641	0.00211268
Y39B6A.13.1	WBGene00012675	Y39B6A.13		29.2367	33.69	25.0633	13.7033	25.6567	31.5433	19.1733	14.1767	0.170354	5.8459e-05	0.0082836
Y39B6A.16.1	WBGene00012678	zhp-4	Zip (Yeast meiotic zipper) Homologous Protein	5.4	3.96667	3.32667	2.90667	4.79667	3.48	2.62	3.48667	0.338497	0.00103668	6.92238e-05
Y39B6A.34a.1	WBGene00012693	Y39B6A.34	APOPT family protein Y39B6A.34, mitochondrial	17.47	9.76667	6.41667	5.96667	13.0667	9.40667	5.60333	7.98333	0.36204	2.98053e-05	0.0232021
Y41D4B.11a.1	WBGene00021514	Y41D4B.11		21.88	12.8967	10.3333	9.32667	19.1567	11.8633	8.27333	10.5267	0.283724	7.14812e-06	0.0371564
Y43F8B.1b.1	WBGene00012812	Y43F8B.1		5.1	2.02333	2.33	2.57667	6.38	2.36	2.15	2.7	0.325734	2.64154e-05	0.000302193
Y45G12B.1.1	WBGene00021562	nuo-5	NADH Ubiquinone Oxidoreductase	63.79	45.06	34.5333	33.1233	45.9933	45.0133	27.46	31.91	0.111014	0.00172595	0.000514872
Y46E12BL.2a.1	WBGene00021595	Y46E12BL.2		14.18	10.38	8.18667	7.42333	11.8267	11.03	7.27667	9.03667	0.768909	0.00182916	0.000163927
Y46G5A.31.1	WBGene00001793	gsy-1	Glycogen [starch] synthase	9.70667	6.84	5.06333	4.66333	8.95	7.69667	5.43333	5.49333	0.579143	0.000343013	6.03156e-05
Y47A7.1.1	WBGene00021613	ttc-37	TeTratriCopeptide repeat domain protein related	6.61333	3.17667	2.77333	3.55667	5.05667	4.25667	3.67667	5.43	0.231072	0.00691328	2.51991e-05
Y47G6A.10.1	WBGene00004978	spg-7	AFG3-like protein spg-7	14.2233	8.48667	6.13333	6.38667	11.3733	8.59667	5.82	7.64	0.590101	0.000202389	0.0017
Y47G6A.25.1	WBGene00021649	Y47G6A.25		13.8833	11.5267	8.89333	7.08667	11.1567	10.8167	6.69333	8.60333	0.238835	0.00220566	6.23147e-05
Y47G6A.6.1	WBGene00021636	pcaf-1	P300/CBP Associated Factor homolog	12.08	12.3367	9.48333	6.42333	12.01	12.34	8.71	7.47667	0.941495	0.000256668	0.000807587
Y48G8AL.11a.1	WBGene00001816	haf-6	HAlF transporter (PGP related)	5.18667	3.29	2.35667	1.93667	4.18	3.02333	2.00667	2.47667	0.313104	2.09706e-05	7.85575e-05
Y48G8AL.11c.1	WBGene00001816	haf-6	HAlF transporter (PGP related)	5.59333	3.11	2.26667	2.21333	3.62667	3.6	1.67333	2.89333	0.258622	0.000118492	0.000368376
Y49A3A.5.1	WBGene00000877	cyn-1	Peptidyl-prolyl cis-trans isomerase 1	106.713	65.03	42.9067	29.1933	91.71	59.36	34.43	31.25	0.154523	1.46236e-07	0.00931133
Y50D7A.9.1	WBGene00021757	taco-1	Translational Activator of Cytochrome c Oxidase	12.7733	6.93333	6.9	6.84667	10.4533	7.42	5.03667	6.89333	0.126565	2.36644e-05	0.000147927
Y51H4A.7.2	WBGene00013103	Y51H4A.7	Probable urocanate hydratase	4.81	2.27333	1.60667	2.24	4.35667	2.4	2.14333	2.62	0.47132	6.77033e-07	0.0182207
Y53C12A.11.1	WBGene00194906	Y53C12A.11		7.89667	6	3.39	2.22667	6.79333	5.78	2.67	2.64333	0.31284	7.70547e-07	0.00807778
Y53C12B.1.1	WBGene00013143	Y53C12B.1		21.05	12.3067	10.63	10.4733	16.3067	12.7633	9.72333	12.7833	0.548621	0.000805828	0.00245611
Y53G8AR.8.1	WBGene00021815	Y53G8AR.8		6.44	3.73333	3.08667	2.75667	5.24	4.06	2.64	3.22667	0.619975	0.000627057	0.000383359
Y54F10AM.5.1	WBGene00021849	Y54F10AM.5	NADH dehydrogenase [ubiquinone] 1 alpha subcomplex subunit 8	40.8367	22.36	20.36	21.1967	32.2667	24.0367	17.58	22.04	0.199486	1.16077e-05	0.00757223
Y54G11A.3.1	WBGene00013214	Y54G11A.3		26.7667	19.76	13.44	10.3167	19.42	18.73	10.48	12.68	0.222516	0.000723595	0.000291275
Y54G2A.12.1	WBGene00021877	Y54G2A.12		13.6333	13.8267	10.5333	6.43	13.4567	13.92	7.75667	6.06667	0.380366	6.05723e-05	0.00203434
Y54G9A.7.1	WBGene00013210	Y54G9A.7	2O16	23.07	12.0967	9.94333	8.74667	15.8167	12.0067	7.87667	9.95667	0.238797	0.00178646	0.00385265
Y56A3A.32a.1	WBGene00006937	wah-1	Worm AIF (Apoptosis inducing factor) Homolog	9.89	5.41	4.44333	4.63667	8.35	5.78	4.24333	6.03333	0.991608	0.000511623	0.00120378
Y57G11A.4.2	WBGene00013292	Y57G11A.4		2.81333	1.38333	1.13	1.30667	2.64	1.67667	1.19333	1.11333	0.985402	2.50647e-06	0.00602118
Y57G11C.3a.1	WBGene00013301	Y57G11C.3	Putative 6-phosphogluconolactonase	7.67	9.56	6.36	3.47667	8.34333	7.91333	4.98	5.52	0.906015	0.00115163	9.63248e-05
Y60A3A.13a.1	WBGene00013361	fars-2	Phenylalanyl Amino-acyl tRNA Synthetase	12.0767	9.28667	7.98333	6.27	10.4133	9.19667	6.04333	6.24	0.205759	0.000740803	0.000368326
Y60A3A.13c.1	WBGene00013361	fars-2	Phenylalanyl Amino-acyl tRNA Synthetase	12.0767	9.28667	7.98333	6.27	10.4133	9.19667	6.04333	6.24	0.205759	0.000740803	0.000368326
Y62E10A.6.1	WBGene00013376	Y62E10A.6	NADPH:adrenodoxin oxidoreductase, mitochondrial	8.56	5.05333	4.16	4.22667	6.95333	4.95	4.12	5.57	0.817902	0.000212945	0.00287861
Y65B4BR.5b.1	WBGene00022042	icd-2	Nascent polypeptide-associated complex subunit alpha	217.043	123.18	79.6733	58.15	152.3	113.893	57.47	54.51	0.146243	0.000254976	0.00696292
Y66A7A.6.2	WBGene00001633	gly-8	Probable N-acetylgalactosaminyltransferase 8	4.15667	2.22667	2.07667	1.86	4.29667	2.14333	1.24667	1.40667	0.150472	6.58004e-07	0.00080658
Y66D12A.23.1	WBGene00013447	nars-2	Asparaginyl(N) Amino-acyl tRNA Synthetase	6.52	4.52667	2.16	1.50667	5.28	5.05333	2.39667	3.1	0.625648	0.000675441	0.00438493
Y66D12A.9.1	WBGene00013435	Y66D12A.9		55.9433	41.44	36.0567	29.7967	44.5633	42.7533	29.4967	32.3867	0.229866	0.000828733	0.000183428
Y66H1B.4.1	WBGene00004981	spl-1	Sphingosine-1-phosphate lyase	23.2267	14.57	11.5433	8.6	21.64	14.55	9.84	10.1867	0.690137	2.04297e-06	0.000709728
Y67D2.4a.1	WBGene00022054	Y67D2.4		4.85333	3.64667	2.66	2.08667	4.12667	3.06667	2.18667	2.49333	0.257631	0.000335418	0.000777984
Y67H2A.4c.1	WBGene00013462	micu-1	Calcium uptake protein 1 homolog, mitochondrial	5.73667	3.14667	2.76333	2.77	3.96333	3.20667	2.36333	3.84667	0.489809	0.0039473	0.00175793
Y71F9AL.13b.2	WBGene00004412	rpl-1	60S ribosomal protein L10a	13.41	7.80333	5.85	5.48333	9.85	8.55333	4.10333	6.38	0.332884	0.000701121	0.000368443
Y71F9B.10b.1	WBGene00004946	sop-3	Mediator of RNA polymerase II transcription subunit 1.1	11.4267	5.50333	4.99	6.12	8.31	6.01	4.81667	6.53333	0.403144	0.000845665	0.000329989
Y71F9B.2a.1	WBGene00022126	Y71F9B.2	Phosphatidate cytidylyltransferase, mitochondrial	19.4433	14.6667	11.6533	9.84667	17.5533	14.1667	9.74	11.0667	0.456402	0.0001613	0.000380494
Y71G12B.24a.1	WBGene00022159	mppa-1	Mitochondrial Processing Peptidase Alpha	12.05	6.97333	4.88	3.98667	9.06	6.26333	4.18667	4.83333	0.25872	0.000140954	0.000686777
Y71G12B.8.1	WBGene00022148	ddx-27	DEAD boX helicase homolog	16.9033	10.04	8.45667	8.98667	14.25	10.69	7.93667	11.6067	0.979174	0.000375403	0.000338113
Y71H2AM.23.1	WBGene00007000	tufm-1	Elongation factor Tu homologue; TU elongation Factor (EF-Tu), Mitochondrial	55.75	36.15	28.7667	27.15	41.2567	34.6267	23.18	28.1833	0.167407	0.00187912	0.000936996
Y73B6BL.3.1	WBGene00022232	exos-2	EXOSome (Multiexonuclease complex) component	10.8167	9.26333	6.91333	5.39	9.67667	9.7	6.01667	5.99333	0.700684	0.000321176	0.000228936
Y73B6BL.32.1	WBGene00003082	lsm-8	U6 snRNA-associated Sm-like protein LSm8	49.71	36.6067	30.8267	27.5267	43.1	37.4633	25.9833	28.41	0.30152	0.000128122	0.0166746
Y76A2B.3.1	WBGene00013575	acs-5	Fatty Acid CoA Synthetase family	10.52	6.3	5.23333	5.85667	8.22333	6.81333	4.91333	5.38667	0.167488	3.6081e-05	0.00316973
Y76B12C.7a.1	WBGene00022301	cpsf-1	Probable cleavage and polyadenylation specificity factor subunit 1	6.89667	4.27	3.4	3.42333	5.47	4.13	3.16333	4.44667	0.706191	0.00718509	0.00271047
Y80D3A.9.1	WBGene00013587	Y80D3A.9		8.72667	5.31333	5.72	4.47667	7.88667	6.52333	5.92	5.60667	0.34717	0.000717627	0.000326619
Y81G3A.3b.3	WBGene00013591	gcn-2	Eukaryotic translation initiation factor 2-alpha kinase gcn-2	4.62667	3.5	2.04333	1.59333	3.58	3.18	2.09	1.32	0.364164	0.00240433	0.00518703
Y92H12BL.1a.2	WBGene00022363	Y92H12BL.1	Threonylcarbamoyladenosine tRNA methylthiotransferase	11.8633	8.23333	5.27333	6.04333	9.78667	8.77333	5.67	7.46	0.913386	0.000183226	0.00775001
Y92H12BR.6.1	WBGene00022371	set-29	SET (Trithorax/polycomb) domain containing	7.95333	5.31667	4.3	4.04667	6.15667	4.70667	3.28	4.01333	0.1115	0.00181844	0.000136236
Y92H12BR.8.1	WBGene00022373	mrpl-15	Mitochondrial Ribosomal Protein, Large	29.9967	20.45	16.6867	15.0133	24.61	19.5867	14.4433	16.2333	0.155924	2.01403e-05	0.00209781
ZC376.6b.1	WBGene00013877	ZC376.6		9.80333	8.62	7.15	4.56333	7.64667	8.68	5.83333	4.65667	0.22236	0.00131357	7.03405e-05
ZC410.2.1	WBGene00013880	mppb-1	Mitochondrial Processing Peptidase Beta	20.58	12.4933	8.46667	7.57	14.9933	11.4767	7.39	8.57	0.153829	5.26054e-05	0.00136451
ZC434.6b.1	WBGene00000148	aph-2	Nicastrin	5.03	3.54667	2.04	1.32	3.78333	3.26333	1.63667	1.35	0.144708	1.84118e-05	0.00829474
ZC443.1.1	WBGene00013896	ZC443.1		2.60667	1.43333	1.23333	1.36333	2.51333	1.77667	1.53	1.36333	0.260631	9.8275e-06	0.038368
ZC477.3a.1	WBGene00022618	ZC477.3		21.9467	17.2333	13.7333	10.02	18.7967	17.2567	10.4867	12.55	0.33134	2.22827e-05	0.00696847
ZC513.4.1	WBGene00006935	vars-1	Valyl Amino-acyl tRNA Synthetase	13.1333	7.40333	5.68333	4.88	11.1133	7.40667	4.97667	5.65667	0.44687	4.64078e-06	0.0176045
ZK1010.2.1	WBGene00014176	ZK1010.2		15.6133	12.1467	9.70333	7.54667	12.2433	11.4633	7.26333	8.31333	0.169968	0.00212904	0.000164959
ZK1058.5.1	WBGene00014205	ZK1058.5	Methyltransferase-like protein	13.88	11.13	8.97	6.74667	12.1933	10.9833	7.58333	7.48333	0.327839	3.15169e-05	0.00454086
ZK1058.9b.1	WBGene00014207	ZK1058.9		11.8267	4.33333	4.65667	3.78667	11.34	5.1	2.73	3.25	0.498376	9.00003e-06	0.00651621
ZK1098.4.1	WBGene00014221	eif-2Balpha	Probable translation initiation factor eIF-2B subunit alpha	16.1733	12.3633	9.83667	8.68667	14.1433	12.1267	9.12	10.88	0.824457	0.00135037	0.00042904
ZK1127.11.1	WBGene00001872	him-14	MutS protein homolog him-14	7	4.99	3.9	3.41667	5.89667	4.94	3.45667	4.96667	0.975189	0.000632765	9.53604e-05
ZK1151.1m.1	WBGene00006876	vab-10	VAB-10B protein	3.88667	2.04333	1.82667	1.42667	3.56333	2.67333	2.53667	1.46667	0.3947	0.000887411	0.0448621
ZK1236.1.1	WBGene00022862	ZK1236.1	Translation factor GUF1 homolog, mitochondrial	8.86	6.05333	4.28667	3.22667	6.68333	5.78333	3.6	3.96333	0.256759	0.000136988	0.00215064
ZK1251.9b.1	WBGene00014243	dcaf-1	DDB1- and CUL4-associated factor homolog 1	18.3967	15.4767	11.2533	9.08667	17.5267	17.1333	10.6867	12.3767	0.527912	0.00328137	0.00081669
ZK177.5.1	WBGene00000375	cyp-44A1	Probable cytochrome P450 CYP44	7.90333	5.87	5.55	4.19667	7	6.22333	4.24333	4.01667	0.28419	0.000831115	0.0010735
ZK228.4c.1	WBGene00013947	ZK228.4		4.68333	1.9	2.33667	1.15	3.53	2.26667	1.8	1.48333	0.492036	0.000427822	0.0110873
ZK287.7.1	WBGene00013967	ZK287.7		13.75	10.49	8.85667	7.33	11.9367	10.8067	8.02	7.84333	0.475381	0.00014272	0.00616202
ZK328.1b.1	WBGene00000874	cyk-3	Ubiquitin carboxyl-terminal hydrolase cyk-3	6.86333	5.09	4.08	3.21333	5.09333	6.33	3.15	2.84	0.424123	0.00397605	0.000702807
ZK381.4b.1	WBGene00003992	pgl-1	Guanyl-specific ribonuclease pgl-1	11.49	9.72	7.27667	4.99667	10.19	9.37667	5.27333	5.73	0.487284	0.00549449	0.00107538
ZK418.8.1	WBGene00022737	tofu-7	Twenty One u-rna (21U-RNA) biogenesis Fouled Up	14.1667	11.4067	8.62667	6.68333	11.6067	10.4667	6.91667	7.67333	0.139942	8.54159e-05	1.24066e-05
ZK512.7.1	WBGene00013986	ZK512.7		218.03	93.4767	83.66	59.59	182.237	96.5167	64.01	82.5367	0.325898	1.01964e-08	0.0277928
ZK524.3a.1	WBGene00003074	lars-2	Leucyl Amino-acyl tRNA Synthetase	9.26333	7.28333	6.44333	4.86	8.07667	7.56667	5.04667	5.33333	0.344236	0.000356923	0.000147839
ZK546.5.1	WBGene00022762	ZK546.5		12.6133	9.23	7.26	6.52	11.7833	9.43	6.71667	7.93333	0.921511	7.57766e-05	0.0444846
ZK550.3.1	WBGene00013997	ZK550.3		31.5367	17.53	14.5967	13.92	23.9567	17.57	11.9667	14.8533	0.279687	0.00076756	0.000672583
ZK616.3a.1	WBGene00022773	ZK616.3		14.63	12.68	9.26333	6.88333	15.59	11.3933	8.27667	7.49667	0.730309	9.78962e-08	0.00904276
ZK686.2.1	WBGene00022792	ZK686.2	Putative ATP-dependent RNA helicase ZK686.2	20.7367	14.4333	11.78	10.4567	17.7267	14.5833	10.2767	11.7933	0.48296	0.000202354	0.00420125
ZK721.2.1	WBGene00006764	unc-27	Troponin I 2	72.41	15.3267	14.0767	11.1667	78.26	16.8833	10.4733	11.21	0.872616	3.59229e-06	0.0249606
ZK795.3.1	WBGene00014083	ZK795.3	Brix domain-containing protein ZK795.3	28.8767	18.1367	17.41	14.6167	24.5367	18.1267	14.71	16.0133	0.251641	2.7463e-05	0.0058313
ZK809.2.2	WBGene00006491	acl-3	Tafazzin family protein	18.88	17.2667	13.8933	9.59333	15.9767	14.7633	11.6633	11.53	0.151242	0.000571492	0.000352309
ZK809.5a.1	WBGene00014087	ZK809.5		11.3867	7.73333	7.28667	5.8	9.78667	8.68333	6.09667	8.00667	0.908654	0.0126934	0.00131891
ZK856.12.1	WBGene00014113	hpo-40		15.88	11.38	7.04667	5.45	12.57	10.6633	6.1	7.14	0.434282	0.000173405	0.000110653
ZK858.7.1	WBGene00014120	ZK858.7		31.29	23.6533	19.45	16.6933	27.4967	23.6333	16.3767	16.2067	0.213753	5.30168e-05	0.000513635
ZK896.6.1	WBGene00014137	clec-187	C-type LECtin	5.03	6.13667	6.34667	2.36667	4.44333	9.58333	6.07667	2.48	0.307656	0.000240649	0.00581326

## Sheet: chronological_up
Supplemental Table S1. Age-dependently regulated transcripts associated with physiological or chronological aging
Age-dependently upregulated transcripts associated with chronological aging
Transcript_ID: Detected transcript, Gene_ID and Gene_name: A gene contains the transcript, WT_d1 to daf-2_d11: Transcript levels in wild-type (WT) and daf-2 mutant animals at different ages
p_genotype: Significance of genotypes on transcript levels, p_age: Significance of ages on transcript levels, p_interaction: Significance of the interaction between genotypes and ages on transcript levels
Transcript_ID	Gene_ID	Gene_name	Description	WT_d1	WT_d4	WT_d7	WT_d11	daf-2_d1	daf-2_d4	daf-2_d7	daf-2_d11	p_genotype	p_age	p_interaction
B0285.9.1	WBGene00000512	ckb-2	Choline kinase B2	2.78667	1.91333	3.37333	7.80667	1.85667	2.70333	4.85333	5.67333	0.750542	0.000416976	0.173093
B0403.3.1	WBGene00015167	B0403.3		2.37667	4.37667	5.28	6.38333	2.43333	4.99	4.46333	4.73	0.133676	1.00897e-05	0.12361
C02C6.1b.1	WBGene00001130	dyn-1	Dynamin	1.11	1.35	1.85	2.73333	1.33667	1.67667	2.19	2.49	0.265438	3.37332e-05	0.157939
C03G5.7.2	WBGene00001448	flp-5	FMRFamide-like neuropeptides 5 APKPKFIRF-amide AGAKFIRF-amide GAKFIRF-amide	2.78667	3.44333	5.95	8.96333	2.67	4.62667	5.48667	6.53333	0.324781	9.82864e-06	0.869704
C04F6.3.1	WBGene00000503	cht-1	Probable endochitinase	12.9267	23.62	30.6767	59.8967	23.4633	41.4	41.58	57.7167	0.214162	0.00985196	0.198161
C06B3.6.2	WBGene00007365	C06B3.6		0.973333	2.21333	3.11	5.18	2.49	3.37	3.17333	4.39667	0.218011	0.000514057	0.537688
C06B3.7.1	WBGene00007366	C06B3.7		4.21667	7.15	16	12.3833	4.57667	13.6733	15.0933	9.75667	0.5507	0.000518009	0.261548
C06C3.1a.1	WBGene00003196	mel-11	MEL-11	2.09	2.22	3.75667	5.57333	2.44667	3.74333	3.59667	6.42667	0.191078	0.000377966	0.134746
C07A9.3c.1	WBGene00006579	tlk-1	Serine/threonine-protein kinase tousled-like 1	2.12667	3.44667	4.22667	5.49667	2.51333	3.72	4.93	6.41667	0.181741	0.000148384	0.927324
C10C5.1b.1	WBGene00007505	pezo-1	Piezo-type mechanosensitive ion channel component	1.33333	1.75333	2.50667	4.45333	1.64333	1.93333	2.78	4.19333	0.67897	4.50683e-05	0.108449
C10G6.1a.1	WBGene00015680	egal-1	Egalitarian protein homolog	2.19333	2.42667	4.46	5.99333	1.83	3.23667	4.67333	5.53667	0.866724	1.49856e-06	0.136842
C14F5.1a.1	WBGene00015776	dct-1	NIP3 homolog	2.19	3.10667	4.18	6.74667	2.03333	3.58667	4.52667	6.44333	0.809387	5.63654e-06	0.811983
C14F5.1b.1	WBGene00015776	dct-1	NIP3 homolog	1.09	1.95	2.94	5.23333	1.22333	2.38333	2.93333	4.56333	0.950199	0.000211504	0.243027
C18C4.10b.1	WBGene00002215	klc-2	Kinesin light chain	8.7	10.7667	15.8	23.9533	8.14	13.5267	16.5867	24.2167	0.495198	1.21596e-06	0.182773
C23H4.1.1	WBGene00000277	cab-1		3.79333	4.01	9.77333	10.17	3.64	8.98	7.10333	10.86	0.426457	0.000522022	0.148602
C25F9.7.1	WBGene00005833	srw-86	Serpentine Receptor, class W	0.793333	1.47	2.68667	3.90667	0.433333	2.39667	2.69333	4.12333	0.45921	2.3359e-06	0.256622
C25G4.10b.1	WBGene00007736	igdb-2	Ig-like and fibronectin type-III domain-containing protein 2	4.78	5.38	8.98667	12.4167	5.39333	6.44	7.72333	11.2367	0.691402	3.72901e-07	0.293922
C30G7.4.1	WBGene00044178	C30G7.4		5.19667	4.12333	10.8033	19.7033	5.82	6.97	11.7967	18.6767	0.28886	1.26101e-08	0.122859
C33A12.4.1	WBGene00007883	C33A12.4		4.92667	4.47667	8.41333	21.1867	5.52333	5.83333	7.83667	16.4267	0.326081	2.91221e-08	0.309847
C34B7.3.1	WBGene00007913	cyp-36A1	Probable cytochrome P450 CYP36A1	1.33667	2.01	2.93	3.27667	1.27667	2.93333	2.99	2.56667	0.765696	3.02033e-05	0.285066
C34C6.7a.1	WBGene00007919	cup-16		1.10667	1.7	4.14	10.7833	1.04	2.65333	3.98667	8.57333	0.306036	2.98167e-10	0.195431
C34E11.4.1	WBGene00007937	C34E11.4		1.57333	3.87	7.66333	5.61333	1.88333	5.29333	6.19667	3.75	0.416242	2.48608e-05	0.571338
C35C5.8a.1	WBGene00007957	C35C5.8		1.21667	1.44667	2.31333	6.71667	1.79333	1.9	2.14667	6.69333	0.510013	2.1998e-08	0.325447
C36B1.6b.1	WBGene00007973	C36B1.6		1.86	1.92667	4.28333	6.74	1.44333	2.76333	3.22	6.09	0.395401	1.42887e-06	0.340037
C36E8.3.1	WBGene00007982	pxd-1	PleXin Domain containing	1.89	2.60333	3.42333	4.95	2.46667	3.62	3.61667	4.22667	0.311746	9.82222e-05	0.340629
C37A5.2.1	WBGene00007989	fipr-22	FIP (Fungus-Induced Protein) Related	0.646667	3.76667	17.05	11.23	2.77667	5.44333	11.72	12.64	0.982654	1.52729e-05	0.879315
C37A5.3.1	WBGene00014698	C37A5.3		0.643333	3.45	11.89	12.5	1.77	4.65667	6.59333	10.32	0.162608	3.05093e-06	0.758036
C37A5.8.1	WBGene00007992	fipr-24	FIP (Fungus-Induced Protein) Related	0.306667	3.56667	21.54	23.1867	2.21667	9.47	24.41	34.7133	0.112931	8.29928e-05	0.826887
C37C3.8a.1	WBGene00016500	memo-1	Protein memo-1 homolog, partial	1.00333	1.35667	2.04333	3.76	0.906667	1.62333	2.52	3.08333	0.967666	9.63658e-07	0.310184
C41H7.4.1	WBGene00016574	lido-11		5.60333	7.54667	10.9333	15.57	5.11333	7.64333	8.96667	14.2833	0.308568	1.25258e-05	0.11559
C44C8.6.1	WBGene00007007	mak-2	MAP kinase-activated protein kinase mak-2	3.33667	4.6	7.33333	10.9433	3.71333	6.36667	7.65	12.1167	0.237896	1.62157e-05	0.409695
C44C8.6.2	WBGene00007007	mak-2	MAP kinase-activated protein kinase mak-2	2.63333	3.47667	5.85333	8.79667	2.50333	3.68667	6.24333	7.53	0.673155	2.54607e-06	0.283312
C46E10.4.2	WBGene00016710	fbxc-52	F-box C protein	0.623333	1.50667	2.49	2.59	1.42667	2.37667	2.11	2.47333	0.252627	0.00365793	0.509787
C47E8.5.2	WBGene00000915	hsp-90	Heat shock protein 90	2.93	4.33667	8.20667	9.33	4.60333	3.47333	6.72	8.45333	0.719739	0.00810748	0.476482
C51F7.1.1	WBGene00001493	frm-7	FERM domain (Protein4.1-ezrin-radixin-moesin) family	3.07667	3.38	3.97667	7.89667	3.18333	4.37667	4.99333	6.86	0.64069	0.0006377	0.125179
C52B9.7a.2	WBGene00003907	paf-2	Platelet-activating factor acetylhydrolase homolog 2	4.01333	4.16	8.04333	12.31	3.42667	5.22667	8.08667	10.5533	0.518443	4.46425e-08	0.149286
D1037.3.1	WBGene00001501	ftn-2	Ferritin	22.6167	26.6867	39.6967	58.43	28.53	37.7533	41.41	51.8533	0.289441	1.66698e-05	0.14424
D2045.9.3	WBGene00008426	D2045.9		2.1	3.92	4.95667	6.21	2.61	4.93667	5.63333	5.72333	0.379879	0.000563343	0.138657
E02H4.3b.1	WBGene00006517	madd-3	Probable dual specificity protein kinase madd-3	1.16	1.58333	2.02333	2.91667	0.883333	1.54667	1.59	2.41333	0.114164	0.000196098	0.199773
F07A11.6b.1	WBGene00008549	din-1	Daf-12-interacting protein 1	1.12	1.14667	1.37333	2.86667	1.00667	1.62	1.61667	2.49333	0.716712	2.03219e-05	0.164898
F09E10.8a.1	WBGene00017298	toca-1	Transducer of Cdc42-dependent actin assembly protein 1 homolog	1.87	2.51	3.66667	5.52	1.97333	3.11	3.36667	5.02667	0.921186	3.79008e-07	0.183395
F11A10.1b.1	WBGene00008682	lex-1	Tat-binding homolog 7	2.69667	2.87	4.66667	7.03667	2.69	3.91333	4.90667	7.22333	0.315043	1.91106e-06	0.109221
F13B9.1b.1	WBGene00017419	F13B9.1	Protein transport protein sec16	1.73333	1.93667	2.35	4.57667	1.76333	2.33667	3.06333	3.65667	0.833682	9.0156e-05	0.284032
F14F9.4.1	WBGene00017467	F14F9.4		6.00333	10.8467	23.27	24.1467	5.29	16.8667	24.4167	20.7267	0.56202	2.32453e-07	0.336243
F14H12.4b.1	WBGene00017472	cst-1	Serine/threonine-protein kinase cst-1 Serine/threonine-protein kinase cst-1 37kDa subunit Serine/threonine-protein kinase cst-1 18kDa subunit	1.11667	1.31333	1.93333	2.98	1.18	1.77	1.96333	2.03667	0.679511	0.00658299	0.81584
F15B9.1.1	WBGene00001387	far-3	Fatty Acid/Retinol binding protein	16.6967	49.5967	202.477	128.913	70.2	118.27	98.4733	25.85	0.134509	0.000508491	0.235019
F16H6.10.1	WBGene00008900	F16H6.10		3.43	3.70333	6.7	11.38	3.51	4.96	6.73	8.22667	0.442943	6.73199e-06	0.127889
F18H3.3a.1	WBGene00003903	pab-2	Polyadenylate-binding protein	2.36667	4.44333	6.13333	9.32333	2.99	5.62667	6.84	9.85667	0.150612	1.25362e-06	0.953663
F18H3.3a.2	WBGene00003903	pab-2	Polyadenylate-binding protein	2.7	4.05667	5.85	14.3867	2.34333	6.33667	9.84333	13.3167	0.512303	0.0036317	0.102445
F20A1.6c.1	WBGene00017618	F20A1.6		0.79	1.38333	3.12667	4.48333	1.06667	1.80667	2.8	5.69333	0.119075	3.32482e-08	0.498706
F20D1.1.1	WBGene00008973	F20D1.1		1.24333	2.34333	3.00667	4.86	1.03667	2.53333	3.69	4.21333	0.986455	7.57724e-06	0.191009
F20D1.10.3	WBGene00008980	emre-1	Essential MCU regulator, mitochondrial	1.39667	1.73333	2.85	4.69667	1.64667	2.51	3.02333	5.00667	0.13274	5.96986e-07	0.116745
F20D1.3.1	WBGene00008975	F20D1.3		4.42	6.14	8.36667	12.7433	4.58	7.58333	10.1333	11.71	0.411463	1.13795e-05	0.124505
F21E9.3.1	WBGene00017667	ttr-37	TransThyretin-Related family domain	4.06	4.28667	7.13667	15.0233	4.44	7.97667	9.41	9.73333	0.762879	6.84024e-05	0.172604
F26F4.3.1	WBGene00004400	rom-1	Rhomboid-related protein 1	4.8	7.19	9.6	11.3167	4.16667	8.98333	10.51	12.52	0.211586	5.68641e-06	0.240974
F28D1.9.1	WBGene00009218	acs-20	Fatty Acid CoA Synthetase family	1.15	1.80667	2.97333	3.92667	1.53667	2.36	2.82333	4.17	0.151762	1.62737e-07	0.302543
F30F8.2.1	WBGene00009271	glna-3	Putative glutaminase 3	1.11333	1.42667	2.39	2.91333	1.20667	1.84667	2.34333	3.64	0.159629	1.84308e-05	0.114318
F35C11.6.1	WBGene00009405	F35C11.6		1.71667	2.88667	5.5	5.84667	1.92	4.11	4.76667	4.84667	0.742977	8.38976e-08	0.355483
F37C4.4b.2	WBGene00018144	F37C4.4		0.896667	1.38333	1.67	3.51667	1.13	1.26333	1.34333	2.18667	0.111261	0.000270007	0.98903
F38A5.7.1	WBGene00018164	sup-36	SUPpressor	17.3933	26.4933	38.71	43.84	17.4833	33.8733	39.9533	47.9733	0.228731	1.02643e-05	0.134433
F41E6.6.1	WBGene00007055	tag-196		19.06	24.3933	41.4267	63.8433	20.0367	32.1367	36.44	51.88	0.443764	4.09796e-07	0.114968
F42G8.3a.1	WBGene00004056	pmk-2	Mitogen-activated protein kinase pmk-2	1.08	2.05333	5.66667	5.37333	0.706667	1.68333	2.92333	5.47	0.135419	0.000103786	0.61146
F42G9.4.1	WBGene00018363	nlp-52	Neuropeptide-Like Protein	1.63	1.88333	2.97333	4.69	2.84333	3.17667	3.71667	3.55333	0.184809	0.014235	0.101549
F47A4.5.1	WBGene00009801	ipla-2	Intracelllar PhosphoLipase A family	3.28667	4.48	5.67333	9.4	3.32	5.48333	5.85333	7.93667	0.894017	8.1675e-06	0.191898
F48F7.2.1	WBGene00006372	syx-2	Putative syntaxin-2	0.896667	1.88667	2.58	5.20667	1.17667	2.53333	3.04667	5.19667	0.114491	8.77206e-09	0.222595
F52E4.8.1	WBGene00018704	ztf-13	Zinc finger putative Transcription Factor family	2.34667	2.36	3.79	5.67667	2.06	3.08	3.36333	4.38667	0.252323	1.80562e-05	0.97617
F53A9.8.1	WBGene00018731	F53A9.8		9.66333	14.13	89.9367	207.253	25.5533	41.7933	138.66	184.243	0.406676	6.14609e-05	0.303412
F53B6.8.1	WBGene00009963	fipr-26	FIP (Fungus-Induced Protein) Related	0.166667	5.47	32.3767	22.4333	2.90333	13.42	34.3	29.5233	0.139287	1.57251e-05	0.872746
F53C11.7.1	WBGene00009976	swan-2	Seven WD repeats, AN11 family	1.33	1.71	2.08333	3.56	1.36667	2.08667	2.74	3.12667	0.394175	1.47374e-05	0.558731
F53C11.8.1	WBGene00009977	swan-1	Seven WD repeats, AN11 family	7.01667	8.04	11.7233	17.0867	6.27	6.89333	11.4433	16.7967	0.519888	6.15934e-06	0.350227
F54B11.5.1	WBGene00010028	F54B11.5		2.29	4.68333	6.91667	9.50333	2.36333	5.83333	7.56667	8.74667	0.59861	1.77741e-06	0.235148
F54B8.4b.1	WBGene00010019	F54B8.4		3.37667	13.2	54.62	59.65	5.43	31.5867	62.1033	52.5967	0.253546	7.51123e-07	0.153509
F54F7.6.1	WBGene00010066	F54F7.6		3.81333	4.65	6.31667	11.44	2.75333	5.28333	6.20667	10.3467	0.569822	1.55676e-05	0.292077
F55C7.7i.1	WBGene00006805	unc-73	Guanine nucleotide exchange factor UNC-73B	1.28	1.25667	1.6	3.09667	1.12333	1.42	1.63	2.26	0.210494	3.0546e-05	0.240365
F56C11.6a.1	WBGene00018958	F56C11.6	Carboxylic ester hydrolase	1.60667	3.94333	5.63667	9.76667	2.44667	5.81333	6.89333	8.80333	0.354528	0.000126781	0.194225
F56C3.9.1	WBGene00018946	F56C3.9		0.553333	2.03333	2.86333	2.99667	1.16667	2.33	2.27667	2.67667	0.997296	0.000230439	0.492036
F56D6.10.1	WBGene00044472	dct-8	DAF-16/FOXO Controlled, germline Tumor affecting	0.596667	14.3433	47.0367	56.2467	3.79	30.1333	27.13	33.7167	0.238943	9.67715e-05	0.354916
F56D6.8.1	WBGene00044292	F56D6.8		0.526667	19.5133	61.1833	40.6067	4.76333	45.06	43.3033	41.9933	0.588286	0.000290544	0.305255
F58A3.1b.1	WBGene00002261	ldb-1	F58A3.1a; LIM Domain Binding protein	1.08667	1.19667	2.36333	2.92667	1.12667	1.91	2.45	3.35667	0.115612	1.17019e-05	0.630963
H01A20.1.1	WBGene00003602	nhr-3	Nuclear hormone receptor family member nhr-3	1.70333	1.91667	2.87	4.96667	1.51667	2.69667	2.76333	4.03	0.638616	3.90628e-06	0.570126
H06I04.6a.2	WBGene00019170	H06I04.6		1.13667	1.91667	4.58667	5.72333	1.32333	3.40333	5.11	5.57333	0.182529	2.06058e-06	0.218194
K02B9.2.1	WBGene00010493	meg-2		2.02333	2.59	3.38	5.37667	1.83667	2.74	3.60667	4.92667	0.777863	6.07565e-07	0.174805
K04G11.4.1	WBGene00010572	wdr-5.2	WD repeat-containing protein wdr-5.2	2.18333	2.69667	3.74333	5.59	2.28333	3.00667	3.61333	5.99667	0.629733	2.56724e-05	0.280043
K07C11.5.2	WBGene00019478	cri-2	Putative metalloproteinase inhibitor tag-225	5.72333	5.73	14.5367	16.53	3.85667	8.03333	10.1933	10.8367	0.169401	0.00509496	0.188452
K11D12.3a.1	WBGene00005655	srr-4	Serpentine Receptor, class R	3.75667	5.60667	10.07	17.3533	2.04667	6.54333	9.35	13.5567	0.138284	3.491e-07	0.687156
M04F3.3.1	WBGene00019769	M04F3.3		4.64667	4.99667	7.47667	11.7733	3.72	5.94	6.82333	12.1933	0.919744	3.0801e-07	0.720646
M05B5.2.2	WBGene00010870	let-522		1.25667	1.63667	2.03	3.07	0.836667	1.81	1.79667	3.66667	0.920904	0.000458776	0.267005
M05D6.7.1	WBGene00001523	gbh-2	Gamma Butyrobetaine Hydroxylase	2.29333	1.81333	3.04333	6.94	2.37667	2.58	3.96333	5.81333	0.613682	4.93176e-07	0.129356
M163.1.1	WBGene00010935	M163.1		1.51333	2.38	3.48333	5.75333	1.63	3.4	4.6	5.39333	0.256964	4.40721e-05	0.138691
R03G5.2.2	WBGene00004758	sek-1	Dual specificity mitogen-activated protein kinase kinase sek-1	1.18333	2.21333	3.11333	4.40333	1.95	2.62333	3.65	3.46667	0.648181	0.0061858	0.103995
R07E3.1a.1	WBGene00011102	R07E3.1		6.12667	8.73333	16.1633	15.91	5.15333	10.54	11.2633	11.8767	0.105228	0.000510949	0.212822
R11D1.1d.1	WBGene00011242	R11D1.1		1	1.48	1.98	3.72	1.94333	2.72	2.63667	3.48667	0.117161	0.0121989	0.161301
R11F4.1.1	WBGene00020007	R11F4.1	Probable glycerol kinase	2.68667	3.59667	4.96667	6.91667	3.19333	5.38333	5.20333	4.62	0.900881	0.00445441	0.692216
R11G1.4b.1	WBGene00004727	sax-1	Serine/threonine-protein kinase sax-1	5.00333	5.87	8.52333	12.8433	4.93333	7.62667	9.09333	12.6867	0.484112	1.86448e-05	0.431509
R13F6.4c.1	WBGene00006498	ten-1	Teneurin-1	1.12333	1.21667	1.93	2.93333	1.08667	1.77333	2.19667	2.29667	0.733286	6.10135e-07	0.314945
R13F6.4d.1	WBGene00006498	ten-1	Teneurin-1	2.04667	2.95	3.47333	5.47667	2.29333	3.60667	4.21667	4.96	0.29623	9.42681e-06	0.163644
T04C10.2a.1	WBGene00001329	epn-1	EPsiN (Endocytic protein) homolog	1.29667	1.88667	2.51667	4.58	0.936667	2.51	3.76667	4.06667	0.579917	0.00107807	0.402968
T04C9.6a.1	WBGene00001489	frm-2	FERM domain (Protein4.1-ezrin-radixin-moesin) family	1.17	1.46667	2.45667	3.14667	0.976667	1.42333	2.12333	2.92	0.276856	7.15571e-06	0.13903
T05A10.1a.1	WBGene00004862	sma-9	SMAll	1.61333	1.67667	2.60667	3.65667	1.88667	2.52333	2.66667	3.57	0.276493	0.000490078	0.178905
T05A6.1.1	WBGene00000516	cki-1	Cyclin-dependent kinase inhibitor 1	2.94667	3.87667	5.42	9.67333	3.43	5.48333	6	8.20333	0.419653	1.78531e-07	0.261235
T07C4.9a.1	WBGene00003589	nex-2	Annexin	3.90333	5.42	10.3433	16.8233	3.23333	6.73333	9.73	16.62	0.968777	3.70652e-06	0.319047
T08A9.12.1	WBGene00004987	spp-2	SaPosin-like Protein family	11.9233	25.6067	239.503	222.457	46.8433	147.617	248.247	138.207	0.527815	0.00126401	0.673141
T08G2.3.2	WBGene00020366	acdh-10	Probable medium-chain specific acyl-CoA dehydrogenase 10, mitochondrial	17.11	18.8867	25.24	39.6333	17.5133	24.3533	25.1967	31.2867	0.740227	5.55864e-05	0.245213
T11B7.2b.1	WBGene00011707	T11B7.2		5.07333	8.93	12.5633	19.3	5.64333	11.2233	13.16	15.73	0.989922	0.00934756	0.134785
T14G8.3a.1	WBGene00011771	T14G8.3		6.28333	6.60333	9.51	14.4567	5.69	7.79333	9.17	12.3133	0.47842	6.68424e-06	0.108281
T18D3.3a.1	WBGene00011821	cdf-2	Cation Diffusion Facilitator family	0.966667	1.50667	1.98	3.20333	1.33	2.03667	2.13	1.6	0.519976	0.00645147	0.554645
T20D4.7.1	WBGene00020613	T20D4.7		1.29333	5.01333	9.59667	8.26667	1.23	4.77333	8.68	7.84	0.338306	8.83537e-09	0.425831
T26H5.9a.1	WBGene00044206	T26H5.9		13.1633	57.89	452.613	1144.7	33.5733	158.93	519.573	823.627	0.561947	2.62726e-08	0.839301
T28B8.1.1	WBGene00012113	T28B8.1		3.63333	7.15	10.2967	18.9733	3.97667	9.32667	11.32	15.25	0.952576	4.86611e-08	0.558864
W01D2.2a.1	WBGene00003651	nhr-61	Nuclear hormone receptor family member nhr-61	1.34	2.14	2.05333	6.28	1.67333	2.74	2.73667	7.8	0.163466	1.45653e-05	0.165077
W04D2.6a.1	WBGene00012245	rbm-25	RNA Binding Motif protein homolog	2.47333	3.69	4.71	7.34333	2.45667	5.14	4.52333	6.44667	0.871285	0.000418736	0.659934
W05H7.4b.1	WBGene00021047	zfp-3	Zinc Finger Protein	1.28667	2.15333	2.73	3.85333	1.51333	2.69	2.82333	4.09	0.399657	0.000479028	0.234382
Y106G6D.8.1	WBGene00013704	Y106G6D.8		2.99667	3.04	6.41333	8.35333	2.92	3.98333	5.30667	5.94667	0.296864	0.000720464	0.338664
Y116A8C.29.1	WBGene00013806	Y116A8C.29		2.41	2.4	3.81667	6.31667	2.53	3	4.03333	6.45333	0.407375	1.42602e-06	0.437304
Y116F11B.17.1	WBGene00189943	Y116F11B.17		1.97	2.31	4.39	7.36667	2.24667	2.96	3.64667	6.14333	0.626252	8.82116e-05	0.467617
Y22D7AR.6.1	WBGene00021260	Y22D7AR.6	Kinase	0.856667	1.50333	2.21333	3.84333	1.29667	2.19333	2.13333	3.32333	0.618097	7.70599e-05	0.403028
Y23H5A.5c.1	WBGene00000832	ctn-1	Alpha-CaTuliN (Catenin/vinculin related)	2.68	3.26	4.86667	8.38667	2.89333	4.34	4.88333	8.23333	0.358671	2.47771e-08	0.128457
Y34F4.1b.1	WBGene00021336	Y34F4.1		3.44333	8.54333	15.2233	11.01	5.81333	12.7967	11.4833	9.65	0.573308	1.98765e-06	0.896369
Y38F1A.10a.1	WBGene00003144	max-2	Serine/threonine-protein kinase max-2	1	1.22667	1.45	3.28333	0.896667	1.34	1.94333	2.67	0.896054	3.88743e-05	0.169983
Y39G10AL.3.2	WBGene00000408	cdk-7	Cyclin-dependent kinase 7	1.77667	1.83667	2.92333	5.13	2.03	3.07333	2.82667	4.77	0.309905	2.64689e-06	0.176036
Y39G10AR.11.3	WBGene00021469	Y39G10AR.11		4.16667	5.05333	9.15	14.7633	5.19333	8.24667	10.19	15.96	0.101157	6.00897e-06	0.455526
Y39G10AR.6.1	WBGene00021464	ugt-31	UDP-GlucuronosylTransferase	9.04	17	38.7367	35.9067	7.47667	26.9233	46.6367	40.56	0.129296	9.60029e-06	0.481732
Y55B1BL.1a.1	WBGene00021909	Y55B1BL.1		1.33	1.49	3.15333	7.42333	1.45333	3.00333	5.13333	6.29333	0.190271	3.03431e-06	0.11773
Y58A7A.3.1	WBGene00021977	Y58A7A.3		24.6633	56.8033	97.4533	84.2633	22.7067	71.63	77.4533	70.93	0.469652	6.94625e-05	0.437772
Y71G12B.20a.1	WBGene00003111	mab-20	Semaphorin-2A	2.22333	3.26	4.74667	6.23333	2.42667	3.57667	4.73	6.28	0.692721	7.27163e-06	0.264603
Y73F4A.1.1	WBGene00013514	Y73F4A.1	DOMON domain-containing protein Y73F4A.1	12.53	17.64	26.6867	32.1967	13.7667	28.2567	27.65	26.2833	0.285757	1.82558e-05	0.222683
Y75B8A.29.1	WBGene00013560	zip-12	BZIP transcription factor family	5.85	8.94667	14.3767	14.21	5.66	10.62	11.27	12.4933	0.27528	1.27233e-05	0.194974
Y79H2A.2b.1	WBGene00013579	Y79H2A.2		1.51	3.47333	5.37667	6.74667	3.06667	3.92	4.25	7.04333	0.704614	0.00530097	0.463073
Y95B8A.6c.1	WBGene00022386	Y95B8A.6		0.61	1.74	2.46667	2.21667	1.04667	2.31333	1.82333	1.66	0.79885	0.000531593	0.309278
ZC13.1b.2	WBGene00022502	ZC13.1		3.71	4.78333	6.57667	8.95667	3.99	5.87	6.95	9.33667	0.304468	2.1186e-05	0.375161
ZC239.14.1	WBGene00022572	ZC239.14		0.596667	2.13667	4.8	3.08	1.08	3.39	3.42667	3.56333	0.491396	1.57389e-05	0.363883
ZK455.4.1	WBGene00000212	asm-2	Sphingomyelin phosphodiesterase 2	2.95333	6.44667	13.16	8.30333	3.69667	10.9767	12.4	11.4267	0.177429	0.00169794	0.352878
ZK525.1.1	WBGene00001458	flp-15	FMRF-Like Peptide	2.82667	3.60667	5.12333	8.56333	2.79	4.77667	5.41667	8.07333	0.670233	3.38814e-05	0.833669
ZK662.3b.2	WBGene00003638	nhr-48	Nuclear hormone receptor family member nhr-48	1.20333	1.76	1.58333	3.09333	1.45667	2.01333	2.19	2.41667	0.611389	0.00257655	0.791881

## Sheet: chronological_dn
Supplemental Table S1. Age-dependently regulated transcripts associated with physiological or chronological aging
Age-dependently downregulated transcripts associated with chronological aging
Transcript_ID: Detected transcript, Gene_ID and Gene_name: A gene contains the transcript, WT_d1 to daf-2_d11: Transcript levels in wild-type (WT) and daf-2 mutant animals at different ages
p_genotype: Significance of genotypes on transcript levels, p_age: Significance of ages on transcript levels, p_interaction: Significance of the interaction between genotypes and ages on transcript levels
Transcript_ID	Gene_ID	Gene_name	Description	WT_d1	WT_d4	WT_d7	WT_d11	daf-2_d1	daf-2_d4	daf-2_d7	daf-2_d11	p_genotype	p_age	p_interaction
AC3.5a.2	WBGene00007071	AC3.5	Aminopeptidase-like protein AC3.5	3.61	1.62667	1.73333	1.21333	3.48	1.79333	1.04333	1.02	0.339061	5.14126e-06	0.718578
B0035.13.2	WBGene00007112	B0035.13		14.08	11.5033	15.4733	8.03667	11.2667	14.6167	10.9933	5.86667	0.144931	0.00168096	0.4787
B0334.1.1	WBGene00007142	ttr-18	TransThyretin-Related family domain	28.3	10.9367	13.3	13.0767	22.82	10.39	12.3367	10.1567	0.161272	5.37474e-05	0.184973
B0395.3.2	WBGene00007175	B0395.3		5.73333	2.47	2.85667	2.50667	4.38333	2.60333	2.59667	1.99667	0.207588	0.000399156	0.628287
C01F6.6a.1	WBGene00006438	nrfl-1	NHERF (Mammalian Na/H Exchange Regulatory Factor) Like	9.21333	6.63	4.65	1.43	8.51333	9.05667	4.49667	2.53	0.344387	1.79674e-05	0.67654
C01G6.6a.1	WBGene00006510	mtrr-1	Methionine synthase reductase	12.9667	5.51667	4.36667	5.05	7.11667	6.39667	4.12	6.19667	0.38975	0.0174363	0.149013
C05C10.7.1	WBGene00007334	C05C10.7		11.2567	7.78333	6.11	5.21333	9.78333	7.82	5.65	7.04667	0.976811	8.6148e-05	0.102903
C05D11.11b.3	WBGene00003214	mel-32	Serine hydroxymethyltransferase	18.5967	7.43	10.5433	6.64333	14.5233	13.3	10.1767	12.5733	0.123574	0.00198556	0.101128
C06A6.4a.2	WBGene00015509	C06A6.4	Aminoacylase	16.1067	6.08333	5.64333	6.38667	12.4333	7.89	6.35333	6.69	0.769763	2.46329e-06	0.258963
C07A9.6.1	WBGene00007402	ugt-60	Putative UDP-glucuronosyltransferase ugt-60	5.19	2.50333	1.59667	1.58	4.17	2.56667	1.44333	1.46333	0.12921	2.69479e-08	0.324871
C09G5.2b.1	WBGene00007488	dph-2	2-(3-amino-3-carboxypropyl)histidine synthase subunit 2	3.34333	1.81	1.46667	1.46333	3.18	2.88667	1.65333	2.26333	0.146251	0.008596	0.171338
C09G5.5.1	WBGene00000656	col-80	Putative cuticle collagen 80	959.27	60.7467	12.1833	6.32333	981.193	55.4067	14.3167	14.2	0.883587	5.02997e-10	0.154151
C10E2.6.1	WBGene00015676	mct-6	MonoCarboxylate Transporter family	5.67667	3.36667	2.36667	2.99	4.56667	3.44	2.50667	2.29	0.198845	6.0679e-05	0.617581
C14H10.1.1	WBGene00007591	zipt-13	Zrt (ZRT), Irt-(IRT-) like Protein Transporter	9.84667	4.15333	4.36	5.47667	9.32333	4.79	3.91333	5.24	0.730064	5.00215e-07	0.318597
C15F1.1a.1	WBGene00015794	C15F1.1		5.12333	1.51	2.08	1.90333	4.00333	2.03	2.03333	2.94333	0.746925	4.42356e-05	0.948359
C16A3.10.1	WBGene00015814	oatr-1	Probable ornithine aminotransferase, mitochondrial	24.8433	18.3167	17.99	12.4767	15.72	20.1333	18.06	11.3	0.312921	0.0441033	0.34183
C16A3.2.1	WBGene00015807	C16A3.2		12.1433	11.14	8.02667	5.17	10.74	11.1433	6.82667	6.30333	0.589372	4.59933e-05	0.948353
C16H3.2.1	WBGene00002272	lec-9	Galectin	100.74	84.57	70.7467	18.0033	111.943	87.7433	30.32	14.1767	0.178802	4.3372e-08	0.249193
C18E9.4.2	WBGene00007684	C18E9.4		94.11	55.54	47.8033	40.4433	84.9467	56.0033	40.3467	46.0667	0.521567	2.72361e-06	0.611649
C23H5.8a.1	WBGene00016027	C23H5.8		82.6133	63.33	86.06	36.1467	88.1733	110.513	77.88	23.7933	0.260663	8.43508e-05	0.918435
C24F3.6.1	WBGene00000698	col-124	COLlagen	1194.85	84.2233	43.1067	16.95	897.43	110.63	42.99	14.5733	0.518535	1.04973e-05	0.229092
C25A1.12b.2	WBGene00007711	lid-1	Abhydrolase domain-containing protein lid-1	16.3167	14.36	9.44	6.54333	15.4867	12.68	7.86667	7.15667	0.598967	0.00470569	0.46531
C25G4.3a.1	WBGene00007731	C25G4.3		13.5	10.1833	7.54667	6.29	12.36	9.96	6.17667	7.43333	0.521946	1.04445e-05	0.335232
C26B2.7b.1	WBGene00016129	C26B2.7		15.3367	12.1367	9.19333	6.43667	14	10.89	6.28667	6.45	0.171249	0.000100998	0.306652
C27A12.3.1	WBGene00006492	let-391		15.7767	10.4567	6.17333	4.74	14.34	10.0333	5.98	6.04667	0.759035	4.92318e-08	0.12709
C27H5.3a.1	WBGene00016173	fust-1	FUS/TLS RNA binding protein homolog	6.76667	5.52667	3.41667	3.19667	5.76	5.71	3.10333	4.75333	0.87544	0.0204639	0.335924
C29E4.15.1	WBGene00045246	C29E4.15		2.38667	1.75333	1.25	1.05	2.75	1.39333	1.17333	1.15667	0.965185	0.000283121	0.454347
C30B5.4.1	WBGene00016245	rbmx-2	RBMX2 ortholog	21.53	16.93	13.45	12.1767	20.97	15.83	12.02	13.59	0.656925	3.58524e-05	0.351211
C30C11.1.1	WBGene00016249	mrpl-32	Probable 39S ribosomal protein L32, mitochondrial	41.9533	26.67	21.7967	20.8767	34.1367	24.6933	18.5433	22.3833	0.106811	9.91773e-06	0.342556
C30G12.2.1	WBGene00016274	C30G12.2		23.6433	3.05	7.72667	7.41	12.9467	3.63	2.98333	5.03333	0.158341	0.0105539	0.513784
C32B5.10.1	WBGene00016303	fbxc-32	F-box C protein	6.58333	5.02333	3.74	2.97	6.95667	5.31333	3.44667	3.35	0.579844	7.52544e-06	0.839718
C34F6.3.1	WBGene00000752	col-179	COLlagen	293.37	25.2367	6.59667	3.25667	195.03	29.1667	8.92667	9.36333	0.387674	1.12644e-05	0.255622
C37C3.1b.3	WBGene00016495	C37C3.1		8.37667	2.68	3.07	3.25	3.77333	4.97333	2.88667	2.99333	0.206444	0.00293621	0.118472
C38D4.10.1	WBGene00044225	C38D4.10		17.8133	11.9867	6.40667	7.54667	14.5967	9.31333	5.99333	8.14667	0.189484	4.42664e-05	0.109063
C41D11.1d.1	WBGene00016561	eri-6	Enhanced RNAI (RNA interference)	6.15333	4.40333	3.07333	2.20333	5.98	3.97667	2.16333	1.70667	0.116157	6.21481e-07	0.207279
C48B4.1.1	WBGene00008167	acox-1.5	Probable peroxisomal acyl-coenzyme A oxidase 1.5	9.78333	5.24667	7.03333	4.30333	10.5067	8.44	5.40667	4.47333	0.21185	5.40155e-06	0.518457
C54G4.9.1	WBGene00008318	C54G4.9		13.9567	11.09	8.36333	6.34333	12.7267	11.0433	7.23667	7.99333	0.740845	4.61395e-06	0.110372
C54G6.5.1	WBGene00005002	spp-17	SaPosin-like Protein family	240.977	164.37	65.57	9.97667	313.86	91.4	13.9167	1.93667	0.31465	9.85652e-09	0.128526
C55A6.4.1	WBGene00008333	C55A6.4		4.5	1.37333	1.08333	1.1	4.35333	1.75333	1.11333	1.61667	0.335619	2.20753e-08	0.339313
C55B6.1a.1	WBGene00016939	C55B6.1		5.00333	3.92667	2.69667	2.27667	4.19333	3.80667	1.96667	1.98	0.130817	0.000102314	0.221935
C55B7.11.2	WBGene00016947	C55B7.11		17.5667	11.91	8.74667	7.77	14.7867	11.6067	7.73667	8.16667	0.29037	1.98988e-05	0.328436
C55B7.4a.1	WBGene00016943	acdh-1	Acyl CoA DeHydrogenase	387.827	128.233	56.6	12.47	309.417	139.3	57.18	28.09	0.695037	1.81098e-05	0.115285
C55B7.9a.2	WBGene00007018	mdt-18	Mediator of RNA polymerase II transcription subunit 18	5.09333	2.30333	1.92333	1.32	4.98	4.11333	1.08667	1.92667	0.463717	0.00044005	0.120113
D1025.2.1	WBGene00008354	gcsh-1	Glycine cleavage system H protein	25.52	11.2	7.69	3.37	24.45	14.2533	6.13667	3.45667	0.870104	7.40525e-11	0.153442
D1054.8.1	WBGene00008375	D1054.8		12.4033	6.88667	7.91	5.55333	11.6367	9.16	7.88667	5.32667	0.558409	4.42184e-06	0.499678
DH11.2.1	WBGene00008436	DH11.2		8.98333	4.04333	3.19333	3.83	8.96667	5.62333	4.26667	8.01	0.101187	0.0110974	0.235483
DY3.4b.1	WBGene00006618	trt-1	Telomerase reverse transcriptase	4.51667	4.21333	3.32667	1.66333	3.33333	4.50667	3.22	2.38667	0.901928	0.044519	0.557726
E01B7.2.1	WBGene00008442	E01B7.2		20.9733	18.1933	13.5033	9.74667	20.64	16.7333	10.9367	10.39	0.362021	7.63932e-06	0.437714
E02H9.7.2	WBGene00017105	E02H9.7		9.05	4.36667	3.24	1.24	10.4767	6.40333	2.53667	1.16333	0.245544	1.88034e-07	0.343128
E04F6.6.1	WBGene00017126	E04F6.6		4.97	1.53	2.10667	2.75333	5.37333	2.32667	1.49667	2.33333	0.858951	1.96245e-07	0.885394
F01F1.6.1	WBGene00000115	alh-9	Putative aldehyde dehydrogenase family 7 member A1 homolog	60.7367	21.1633	15.2167	11.18	54.6967	23.7967	14.12	13.2667	0.756498	2.8744e-10	0.101192
F07A11.5.1	WBGene00008548	F07A11.5	Ribokinase	6.41	3.23333	3.30333	3.04	6.67667	4.55333	3.5	2.47333	0.242567	2.08965e-07	0.487543
F08F3.4.1	WBGene00017262	F08F3.4		24.59	12.2633	7.99667	8.19333	19.1767	13.8267	7.52333	6.96667	0.169253	1.12001e-07	0.322987
F08F8.4.1	WBGene00017269	F08F8.4		35.0367	29.55	24.55	19.3733	31.0033	28.08	20.2133	19.8167	0.133897	6.04316e-05	0.319123
F09C8.1.1	WBGene00008621	F09C8.1		11.5833	35.4067	33.1533	6.13333	10.0967	62.87	30.5633	2.73667	0.133248	2.83703e-07	0.528428
F10C1.2a.1	WBGene00002053	ifb-1	Intermediate filament protein ifb-1	8.64	2.72333	2.73333	1.71333	5.75667	4.71	1.88333	2.39667	0.714058	0.000539022	0.195495
F10C1.2a.2	WBGene00002053	ifb-1	Intermediate filament protein ifb-1	7.47333	2.93333	2.17	1.42	5.95	2.21	2.19	1.39	0.179412	8.45586e-07	0.561999
F10C1.7c.1	WBGene00002054	ifb-2	Intermediate filament protein ifb-2	9.79333	4.96667	4.97333	4.20667	12.1367	6.30333	2.82	1.47333	0.448003	2.67158e-09	0.311919
F10D2.11.1	WBGene00017336	ugt-41	UDP-GlucuronosylTransferase	9.67333	4.19667	4.55667	2.75	8.76667	6.77	4.44667	3.35667	0.466993	0.000223984	0.314503
F11G11.3.1	WBGene00001754	gst-6	Probable glutathione S-transferase 6	8.30333	7.21	8.14	3.49	8.32	8.75667	7.69333	2.93667	0.88886	0.0073197	0.429797
F14F7.1.1	WBGene00000673	col-98	COLlagen	339.91	37.87	20.9967	8.39667	357.39	43.5333	15.4033	9.33333	0.731879	6.15474e-11	0.105276
F15A4.12.2	WBGene00044322	tag-280		11.6167	9.33333	6.74333	5.68333	11.3233	8.99333	6.63667	6.29333	0.952611	1.59939e-05	0.680296
F15D4.3.1	WBGene00008860	romo-1	(Reactive Oxygen species MOdulator) homolog	66.3867	54.5233	49.96	37.5967	63.3333	57.8867	34.2333	38.87	0.186179	9.50332e-06	0.218997
F15E11.12a.1	WBGene00017498	pud-4	Protein Up-regulated in Daf-2(Gf)	8.70333	11.5333	9.37333	2.35	2.58667	18.8633	8.08	0.393333	0.818032	0.00374955	0.973443
F15E6.4.1	WBGene00017485	F15E6.4		62.7967	93.7833	66.53	24.7567	82.2567	58.26	35.3933	17.3767	0.110117	0.00088689	0.769478
F17C8.9.1	WBGene00185014	F17C8.9		6.51	2.21333	2.10333	2.46333	6.05333	2.84333	1.84333	2.36333	0.90039	2.40289e-06	0.385306
F18E3.13.1	WBGene00045276	F18E3.13		13.9433	10.4267	10.38	5.72333	17.3767	8.25333	7.22	5.03333	0.693607	0.00394583	0.986376
F25H5.6.2	WBGene00009128	mrpl-54	Mitochondrial Ribosomal Protein, Large	4.13333	3.56333	3.79333	2.23	4.75667	4.29333	3.11667	2.45667	0.521687	0.00465621	0.143002
F28A12.4.1	WBGene00017881	asp-13	ASpartyl Protease	33.0267	7.54	10.4867	4.65667	14.7967	28.52	18.8133	9.17	0.259691	0.0196421	0.607807
F28B3.5a.1	WBGene00017886	F28B3.5		16.2933	15.5	11.6733	7.35	13.4533	15.7233	9.92667	7.41	0.204987	1.31783e-05	0.259351
F28C6.1.1	WBGene00009202	aptf-4	AP-2 Transcription Factor family	3.12667	3.65333	2.74	1.77667	2.59667	4.07	2.67333	2.63667	0.517845	0.0034373	0.32683
F28F5.6.1	WBGene00017905	F28F5.6		4.38	4.29	3.87667	2.26667	5.82667	5.79	2.61	1.88333	0.290949	7.19842e-06	0.215327
F29F11.3.1	WBGene00009256	tut-2	Cytoplasmic tRNA 2-thiolation protein 2	16.5033	12.97	8.72667	8.39	14.3933	12.0933	8.28667	8.97667	0.3208	1.02524e-05	0.243262
F32A5.3.1	WBGene00017969	F32A5.3	Uncharacterized serine carboxypeptidase F32A5.3	12.6	8.37333	4.86333	1.87	11.3067	11.31	3.37333	0.976667	0.759712	1.35849e-08	0.815283
F32D8.4.1	WBGene00009329	F32D8.4		12.6467	10.1933	8.86333	7.16667	10.4433	10.8933	8.19333	9.19333	0.948792	0.00206934	0.355338
F35B12.7.1	WBGene00003762	nlp-24	Neuropeptide-Like Protein	83.63	7.45667	3.61667	1.60333	64.23	5.47667	2.06	2.33	0.170813	3.57493e-09	0.169522
F35D11.4.1	WBGene00018045	F35D11.4		11.3167	5.69333	1.72	2.18333	10.34	1.57667	1.98333	2.15	0.268089	8.5497e-05	0.428205
F35D11.4.2	WBGene00018045	F35D11.4		87.5667	44.74	24.31	13.0967	108.08	33.1467	15.0833	12.4967	0.950102	3.59235e-10	0.927751
F36F2.1b.1	WBGene00009475	F36F2.1		3.00333	1.17333	1.93667	1.57667	2.78	1.68667	1.87333	1.6	0.742177	0.000313868	0.126389
F37B4.7.1	WBGene00018138	folt-2	Folate-like transporter 2	81.1633	16.7233	9.28667	2.66	45.6433	14.7667	4.27333	1.54667	0.203391	0.000385155	0.189353
F39H2.2a.1	WBGene00000890	sig-7	Peptidyl-prolyl cis-trans isomerase sig-7	12.4433	10.8333	6.37	4.82	11.0667	12.4833	7.21667	6.66667	0.671264	0.0466119	0.393893
F39H2.4.1	WBGene00006377	syp-3		24.0367	17.94	14.8233	12.5633	19.3833	20.1267	12.47	14.2	0.608993	0.00350209	0.635835
F40A3.2.1	WBGene00018217	F40A3.2		14.3933	7.48	6.27	5.76333	11.2033	8.35	5.92333	6.52667	0.440713	3.81456e-06	0.301045
F41E6.2.1	WBGene00001694	grd-5	GRounDhog (Hedgehog-like family)	62.8567	9.00667	4.44667	1.93	66.7833	19.2767	7.76667	2.75333	0.152076	1.85167e-09	0.161735
F42A8.1.1	WBGene00009626	F42A8.1		43.08	23.6367	27.7833	14.1967	38.3067	28.5533	18.02	10.9533	0.128146	1.08135e-06	0.504684
F42A9.6b.1	WBGene00018335	F42A9.6		20.14	16.0667	10.4667	6.47333	17.79	14.1233	8.68667	6.76667	0.206082	5.89114e-06	0.450515
F42A9.6c.1	WBGene00018335	F42A9.6		32.6933	26.9367	16.53	12.0133	28.58	23.4633	13.8033	12.6467	0.175715	6.30246e-06	0.493792
F42E11.4.1	WBGene00006584	tni-1	Troponin I 1	5.84333	1.59333	1.92	2.20333	4.86667	1.47333	1.43667	1.6	0.308336	0.000291036	0.168296
F42G10.1.1	WBGene00009645	F42G10.1		7.42333	1.24	1.18	0.953333	6.70667	1.41	1.16	1.12333	0.825631	2.09736e-07	0.224912
F42H10.2.1	WBGene00018366	F42H10.2		49.5633	44.5133	36.33	26.7333	45.37	42.9933	29.26	25.7267	0.143276	2.95528e-05	0.115431
F43E2.5.1	WBGene00018393	msra-1	Methionine Sulfoxide Reductase A	147.933	20.9233	9.63	8.79667	52.9267	14.8267	9.36	8.88667	0.310907	0.0480145	0.450151
F43E2.5.2	WBGene00018393	msra-1	Methionine Sulfoxide Reductase A	39.8467	6.69333	2.78333	2.14333	19.42	5.76333	3.03	3.27667	0.468873	0.0370147	0.529856
F45G2.9.1	WBGene00009735	F45G2.9	rRNA methyltransferase 2, mitochondrial	4.07667	3.01333	2.41	2.23667	3.93667	3.22333	2.30333	3.08333	0.41508	0.00149736	0.585721
F45H11.11.1	WBGene00303028	F45H11.11		80.62	59.7033	53.93	37.8867	63.51	63.35	36.9333	45.51	0.245799	0.00139787	0.691587
F46H5.3a.4	WBGene00018519	F46H5.3	Probable arginine kinase F46H5.3	85.05	26.6633	30.9533	27.5567	65.82	26.2733	30.96	25.6867	0.512753	0.00152789	0.411371
F54C1.7.2	WBGene00003934	pat-10	Paralysed Arrest at Two-fold; Troponin C	121.94	33.1867	31.0967	28.4667	110.543	39.2767	28.33	29.1267	0.741853	3.36026e-08	0.195327
F54C9.9.1	WBGene00010044	F54C9.9		9.38333	5.43667	4.91333	5.19667	9.11	5.83	4.73667	6.27333	0.657399	0.000337026	0.157913
F54D7.7.1	WBGene00023068	rpl-41.2	Ribosomal Protein, Large subunit	3999.93	3149.5	2547.2	2014.76	3764.34	3304.65	2228.05	2599.96	0.827685	0.000272119	0.290301
F54E7.8.2	WBGene00018830	ska-3	Spindle and Kinetochore-Associated protein homolog	27.0867	29.7933	19.1967	14.5133	31.6333	24.5333	17.3033	16.2833	0.841471	2.43292e-07	0.883155
F55A12.2c.1	WBGene00018863	F55A12.2		7.14333	3.49	3.12667	2.13	6.79333	4.74667	3.31333	3.29333	0.228603	4.47956e-05	0.552298
F55C10.3.1	WBGene00000728	col-155	Putative cuticle collagen 155	15.4133	3.78	2.22667	1.64667	12.9767	3.74667	1.62	1.01667	0.459195	7.95146e-06	0.105565
F57B1.4.1	WBGene00000733	col-160	COLlagen	562.927	46.93	15.1833	5.18333	609.533	46.87	17.87	8.92667	0.627756	5.26366e-10	0.134721
F57H12.7a.1	WBGene00003178	mec-17	Alpha-tubulin N-acetyltransferase 1	4.31333	1.65	2.1	1.98667	3.22667	2.18333	1.59	1.61333	0.111954	2.15385e-05	0.601823
F58B3.1.1	WBGene00003093	lys-4	LYSozyme	81.7967	3.43333	18.6733	22.32	40.1233	7.72667	8.99667	11.8267	0.187106	0.00886345	0.317916
F59A3.3.1	WBGene00019076	mrpl-24	Probable 39S ribosomal protein L24, mitochondrial	22.77	14.2133	10.94	9.62	20.1233	13.97	10.1033	10.23	0.374255	4.81769e-07	0.327107
F59C6.4.1	WBGene00010325	exos-3	EXOSome (Multiexonuclease complex) component	49.8367	42.78	35.4967	27.3	43.8467	41.34	29.2133	27.47	0.112661	2.71625e-05	0.285387
H12C20.3b.1	WBGene00003658	nhr-68	Nuclear Hormone Receptor family	11.13	4.69667	4.73	3.61667	8.40333	6.00333	5.72	5.18333	0.7297	0.0013919	0.869533
K02D7.3a.1	WBGene00000675	col-101	COLlagen	577.607	163.09	72.34	34.4967	615.187	107.977	45.8633	36.0767	0.612631	3.64585e-11	0.134434
K04C1.5.1	WBGene00010555	K04C1.5		32.29	20.6833	13.3233	9.41333	30.6333	20.8833	11.39	8.44333	0.529065	8.71738e-07	0.445344
K04D7.3a.1	WBGene00001794	gta-1	Probable 4-aminobutyrate aminotransferase, mitochondrial	50.26	19.5867	21.6067	24.7433	36.49	21.9633	19.9933	25.7367	0.22602	2.12034e-05	0.815455
K04D7.3b.2	WBGene00001794	gta-1	Probable 4-aminobutyrate aminotransferase, mitochondrial	28.73	11.0633	13.59	13.7633	23.2633	12.6733	11.8733	15.5233	0.214543	4.71143e-09	0.619222
K06G5.2.1	WBGene00010606	cyp-13B2	CYtochrome P450 family	2.36667	1.75667	1.31	1.20667	1.64667	1.89667	1.45667	1.11667	0.431984	0.00853443	0.212473
K07A1.16a.1	WBGene00000177	aqp-9	Aquaporin	3.10667	1.54333	1.79333	1.38667	2.23667	1.46333	1.33	1.85667	0.146016	0.000228015	0.112675
K08D8.6a.1	WBGene00010660	K08D8.6		19.31	15.52	11.9867	9.46	18.0233	18.6267	12.29	7.93	0.886113	2.33903e-05	0.356813
K10B2.1b.2	WBGene00003009	lin-23	F-box/WD repeat-containing protein lin-23	3.45333	3.39	1.80333	0.913333	3.38667	2.73	2.26	1.33667	0.923053	0.00391265	0.172946
K10C2.4.2	WBGene00019620	fah-1	FumarylAcetoacetate Hydrolase	22.9767	15.6833	15.7367	13.0067	21.3533	19.46	17.12	14.24	0.350473	0.00203745	0.411468
K11D12.13.1	WBGene00044535	K11D12.13		41.7667	27.24	19.54	16.9133	43.39	27.07	18.51	13.6	0.712066	4.14258e-07	0.597775
K11D9.3.1	WBGene00010772	K11D9.3		2.59333	1.15333	0.88	1.39333	1.79667	1.08	1.15	1.45	0.530947	0.00598768	0.85417
M01E11.4c.1	WBGene00019713	pqn-52	Prion-like-(Q/N-rich)-domain-bearing protein	11.7433	9.81	6.36667	2.57	10.77	9.02333	5.04333	2.95	0.211328	5.9605e-08	0.571214
M03B6.1.1	WBGene00010833	M03B6.1		11.37	7.64333	5.20667	2.76667	11.3533	8.05333	4.41667	2.38667	0.638315	2.3404e-09	0.309297
M04C9.3b.1	WBGene00010858	M04C9.3		3.19333	1.79667	0.973333	1.39333	2.29333	1.76	1.06333	1.90333	0.795781	0.0146659	0.753689
M117.6.1	WBGene00044253	M117.6		4.69333	3.16333	2.34333	1.8	3.75333	3.38	2.96333	2.29667	0.779989	0.0036356	0.568888
MTCE.16.1	WBGene00010961	nduo-2	NADH-ubiquinone oxidoreductase chain 2	2.58	1.41667	1.46	1.07333	2.15667	1.84333	1.7	2.17	0.104726	0.0332453	0.189657
MTCE.21.1	WBGene00000829	ctb-1	Cytochrome b	598.433	271.92	201.237	200.563	409.39	286.2	240.587	352.993	0.927092	0.00305198	0.23112
MTCE.25.1	WBGene00010963	nduo-4	NADH-ubiquinone oxidoreductase chain 4	126.47	58.0667	51.81	56.6733	87.1267	57.3033	50.9667	75.0433	0.644817	0.02329	0.252846
MTCE.26.1	WBGene00010964	ctc-1	Cytochrome c oxidase subunit 1	1476.6	716.463	512.527	489.077	949.857	711.607	540.833	676.173	0.401676	0.00041553	0.15415
MTCE.3.1	WBGene00010957	nduo-6	NADH-ubiquinone oxidoreductase chain 6	11.3233	7.39667	7.93667	5.73667	10.2467	6.70333	7.37667	8.55667	0.883114	0.0181846	0.119232
MTCE.31.1	WBGene00010965	ctc-2	Cytochrome c oxidase subunit 2	514.357	249.167	144.593	146.85	319.767	271.2	183.037	304.417	0.916559	0.033481	0.2172
MTCE.34.1	WBGene00010966	nduo-3	NADH-ubiquinone oxidoreductase chain 3	20.0867	9.72333	11.1467	7.77	17.6067	9.87333	10.09	11.6167	0.938828	0.00139856	0.392778
PAR2.1.1	WBGene00019800	mtss-1	Single-stranded DNA-binding protein, mitochondrial	80.5867	62.0767	48.7767	37.5867	73.3167	58.7	37.7867	39.2867	0.113511	8.85094e-07	0.127605
R02D3.1a.1	WBGene00019819	aass-1	AminoAdipate-Semialdehyde Synthase homolog	15.21	6.03333	4.87	5.77333	11.8733	6.40333	4.53	4.95333	0.240805	9.36271e-06	0.223162
R03G5.5a.1	WBGene00019846	gpx-7	Glutathione peroxidase	3.57333	1.04333	1.71667	1.24333	3.13333	2.28333	1.93333	1.04	0.443425	0.000196424	0.396757
R04F11.2.2	WBGene00011015	R04F11.2		34.9733	21.99	23.3267	18.3367	30.63	21.33	17.5133	20.1	0.408884	0.010074	0.203429
R04F11.5.1	WBGene00011017	R04F11.5		29.3633	19.84	14.2833	9.97	24.8333	18.1967	11.1867	11.3267	0.125105	6.40682e-07	0.722984
R05D3.6.1	WBGene00019880	R05D3.6	Putative ATP synthase subunit epsilon, mitochondrial	17.77	6.35333	6.35333	5.99667	21.0933	6.17667	3.66333	6.02333	0.933964	1.15069e-05	0.831668
R05F9.13.1	WBGene00003429	msp-31	Major sperm protein 19/31/40/45/50/51/53/59/61/65/81/113/142	8.05	1.54667	1.63	3.72	4.61	1.78333	0.906667	9.15667	0.721359	0.00309716	0.36999
R10D12.13c.2	WBGene00011194	R10D12.13		4.17333	3.33	2.30333	2.07	4.84333	4.1	2.76333	2.74333	0.162468	0.012024	0.768346
R12C12.1a.1	WBGene00020022	gldc-1	Glycine cleavage system P protein	8.84667	2.76333	2.09667	2.09	5.82667	3.13333	1.59333	3.51333	0.387746	6.13871e-06	0.10782
R12C12.1b.1	WBGene00020022	gldc-1	Glycine cleavage system P protein	5.89	1.96333	1.62667	1.97	3.09	2.09667	2.07	3.32333	0.583185	0.00100673	0.253789
R12C12.9a.2	WBGene00020029	R12C12.9		2.93333	1.80667	2.77	1.40667	2.14333	2.46667	1.41333	1.13667	0.125351	0.0325531	0.987168
R144.11.1	WBGene00020099	R144.11		11.1667	7.26333	5.5	4.90333	9.63667	7.22667	5.14333	5.58	0.589395	4.00843e-05	0.138789
T01C8.2.1	WBGene00020143	T01C8.2		28.7067	9.71	10.4633	10.6467	23.6	12.88	9.73667	10.6067	0.691195	1.58896e-05	0.343256
T02E1.5a.1	WBGene00000967	dhs-3		30.7033	19.5367	23.1967	12.72	22.4167	21.2167	20.4733	16.8667	0.531874	0.00887699	0.120489
T04A8.12.1	WBGene00007045	tag-189	Post-GPI attachment to proteins factor 2	13.3333	7.79667	5.41	5.17333	11.34	7.01333	5.26667	6.89667	0.670672	1.88544e-05	0.51187
T04A8.5.1	WBGene00011407	ppat-1	Amidophosphoribosyltransferase	5.13	3.54333	1.94333	0.936667	4.43	3.52667	1.33667	1.17333	0.161033	2.62624e-09	0.910927
T04C12.6.3	WBGene00000063	act-1	Actin-1	52.3733	21.1933	21.7533	26.81	47.1067	22.2667	20.7633	23.13	0.471945	2.04047e-05	0.12018
T05E11.4a.1	WBGene00004985	spo-11	Meiotic recombination protein spo-11	22.5967	17.9233	14.1933	11.0033	17.55	16.6367	11.41	11.86	0.101593	0.000455416	0.254684
T06C12.4.1	WBGene00011513	fbxa-197	F-box A protein	7.99333	5.75333	4.71	4.41	6.00667	5.58667	4.43667	4.98333	0.134955	0.000127957	0.139815
T08A9.7.1	WBGene00004988	spp-3	SaPosin-like Protein family	306.253	306.257	288.89	146.503	364.36	428.757	211.353	69.76	0.763312	2.76504e-06	0.889031
T09A5.15.1	WBGene00011641	T09A5.15		8.16667	7.12	6.79333	4.45	8.17	6.60333	4.64333	5.53333	0.46278	0.00404816	0.799741
T09B4.2.2	WBGene00020376	T09B4.2		35.23	31.67	19.1833	15.0167	33.4233	30.06	19.6433	17.5567	0.950672	3.70694e-06	0.176256
T10H9.5a.1	WBGene00004062	pmp-5	Peroxisomal Membrane Protein related	19.9867	4.45	2.65667	1.70333	21.7633	8.78667	4.71	3.57	0.313085	0.00030942	0.148957
T13F3.6.1	WBGene00011753	T13F3.6		146.893	49.5833	13.1567	3.97667	99.2967	22.8367	6.30333	3.97	0.14848	5.72079e-05	0.168531
T15B7.4.1	WBGene00000715	col-142	COLlagen	185.037	3.38	1.94	1.87667	211.757	8.17667	3.53	4.37333	0.717868	7.79666e-05	0.204161
T19C4.7.1	WBGene00003771	nlp-33	Neuropeptide-like protein 33	19.3033	11.2367	6.55	6.43333	26.63	7.94667	4.63667	3.69	0.848089	5.46969e-10	0.809421
T19H12.9.1	WBGene00020592	ugt-12	UDP-GlucuronosylTransferase	12.1767	6.94	5.60333	5.58333	10.87	7.49	4.13	4.94	0.28263	1.27917e-05	0.846405
T20D3.3b.1	WBGene00011857	coa-4	Cytochrome Oxidase Assembly subunits	5.39	2.48667	2.58	2.12333	3.42333	2.52667	2.43667	2.28333	0.110756	0.000249075	0.603896
T21C12.2.1	WBGene00001993	hpd-1	4-hydroxyphenylpyruvate dioxygenase	36.14	23.3833	20.42	15.78	28.1867	23.5467	18.3033	15.5767	0.118799	1.57347e-05	0.742372
T21C9.3b.1	WBGene00011891	del-6	DEgenerin Like	31.9867	16.0767	14.1733	13.0667	27.5733	19.65	13.78	12.59	0.669619	2.39669e-08	0.498734
T21E8.3.1	WBGene00004002	pgp-8	p-GlycoProtein related	20.94	16.29	14.4	10.7467	15.8733	20.3933	15.55	15.8867	0.184231	0.00400364	0.431692
T23B5.4a.1	WBGene00011941	T23B5.4		18.36	16.5867	14.47	10.3867	16.9233	16.0467	10.3567	11.91	0.18585	0.000157078	0.182773
T24H7.1.2	WBGene00004015	phb-2	Mitochondrial prohibitin complex protein 2	13.6733	11.6833	5.10667	2.95333	12.0967	8.84333	6.47333	7.65667	0.82181	0.0278338	0.567453
T25C8.2.2	WBGene00000067	act-5	ACTin	23.28	10.6367	6.59667	2.63333	19.7267	9.98333	4.1	2.33333	0.353645	1.85675e-05	0.461266
T27E9.2.1	WBGene00012094	T27E9.2	Cytochrome b-c1 complex subunit 6	234.107	145.643	122.113	128.503	202.313	139.973	101.467	126.247	0.177169	2.68358e-05	0.162513
W01A11.4.1	WBGene00002273	lec-10	Galectin	73.9167	34.2633	21.13	8.17	76.9033	49.93	20.0333	7.22333	0.337087	9.73155e-08	0.132017
W01F3.1a.1	WBGene00012184	mnr-1	MeNoRin (Dendritic branching protein)	6.65667	3.07667	2.97667	3.43667	5.46	3.51	2.56667	3.38667	0.261485	1.63369e-06	0.289737
W02A11.2.1	WBGene00012193	vps-25	Related to yeast Vacuolar Protein Sorting factor	16.1667	13.78	9.55333	7.06667	14.5233	12.83	9.36667	8.16667	0.607394	2.9063e-05	0.737399
W03G9.8.1	WBGene00044431	mzt-1	Mitotic spindle organiZing protein (MOZART) homolog	67.2	75.9767	54.3433	36.5967	66.1767	70.6267	44.07	38.2433	0.186406	6.87093e-07	0.209445
W04E12.7.1	WBGene00012252	W04E12.7		4.13333	1.16667	1.27	1.13667	4.63	1.51333	1.19	1.52	0.130606	7.49431e-09	0.808716
W05E7.1.1	WBGene00001692	grd-3	GRounDhog (Hedgehog-like family)	105.07	6.95333	2.13	0.806667	104.843	16.2267	3.10333	0.58	0.726808	6.51193e-08	0.10246
Y102A5C.1.1	WBGene00013610	fbxa-206	F-box A protein	12.3167	11.3467	7.77667	6.04	11.9367	10.54	7.1	8.03	0.958041	3.99562e-05	0.151832
Y106G6H.15.2	WBGene00013725	ska-1	Spindle and kinetochore-associated protein 1	33.2767	26.12	21.4833	17.5633	34.4833	30.1667	18.6967	20.1067	0.502178	0.00011101	0.505475
Y17G7B.1.1	WBGene00012457	acbp-6	Acyl-Coenzyme A Binding Protein	5.11	2.54667	2.81	2.15667	3.69	2.65667	2.15333	2.03333	0.190926	0.00351123	0.441566
Y22F5A.4.2	WBGene00003090	lys-1	Lysozyme-like protein 1	65.38	69.2467	81.66	23.87	79.7667	99.4533	58.9133	22.5	0.524153	0.000389766	0.138963
Y34B4A.9.1	WBGene00021325	Y34B4A.9		79.9833	93.42	71.8667	19.5633	73.4633	125.88	56.0033	18.6233	0.788589	2.4006e-05	0.178022
Y34D9A.11.1	WBGene00021335	spp-23	SaPosin-like Protein family	26.22	9.28667	9.03333	5.52	30.7933	3.41333	2.35333	2.15667	0.15196	4.9318e-07	0.161243
Y38C1AA.14a.1	WBGene00195063	coa-1	Cytochrome Oxidase Assembly subunits	11.8233	6.85	6.18333	5.97	10.27	8.28	6.03667	5.44333	0.707083	1.50671e-05	0.33255
Y38C1AA.14b.1	WBGene00195063	coa-1	Cytochrome Oxidase Assembly subunits	6.86	4.30333	2.82667	2.71	6.36	2.52	3.05667	3.58333	0.595771	0.000817295	0.298683
Y38F1A.6.2	WBGene00012608	hphd-1	Hydroxyacid-oxoacid transhydrogenase, mitochondrial	35.9233	7.13333	3.28667	2.65	18.98	5.35	2.02667	2.90667	0.182889	0.000468538	0.261783
Y38F1A.6.3	WBGene00012608	hphd-1	Hydroxyacid-oxoacid transhydrogenase, mitochondrial	27.2667	6.21333	2.06333	1.45667	18.68	4.06667	1.95	1.47	0.374207	0.000382597	0.147909
Y38F1A.9.1	WBGene00003860	oig-2	One IG domain	36.1267	9.94667	10.46	5.88667	41.8567	7.53	4.89	4.63333	0.520122	9.38845e-11	0.59808
Y38F2AR.3a.1	WBGene00021421	Y38F2AR.3		6.85667	3.27667	3.11333	2.71	6.01333	3.43333	2.91333	3.90667	0.899543	0.0038109	0.557041
Y39A1A.14.1	WBGene00012652	Y39A1A.14	Ribosomal RNA small subunit methyltransferase nep-1	26.09	17.05	15.59	13.37	21.7567	16.28	13.3067	16.0667	0.253541	2.30214e-05	0.150756
Y39C12A.8.1	WBGene00001044	dnj-26	DNaJ domain (Prokaryotic heat shock protein)	14.2833	13.4	11.7367	7.19667	13.3233	13.57	9.34	7.70667	0.405829	0.000143793	0.83816
Y41C4A.16.1	WBGene00000670	col-95	COLlagen	232.317	252.443	141.34	118.853	280.893	209.367	110.877	125.16	0.867606	0.00564093	0.205084
Y42H9AR.3b.1	WBGene00021538	rabs-5	RABenoSyn (Trafficking protein) homolog	6.31333	4.91667	3.44	2.54	5.67333	4.52667	2.68333	2.81333	0.22858	5.38187e-06	0.131965
Y43F4B.9a.3	WBGene00012806	Y43F4B.9		8.78333	8.44667	7.52	4.63	9.37667	9.22333	4.88333	5.23667	0.827585	0.0032466	0.218076
Y44F5A.1.1	WBGene00012858	Y44F5A.1	3E324	10.82	7.46667	6.47667	6.13667	9.85667	6.85667	5.83667	7.2	0.516769	3.3279e-05	0.371347
Y46G5A.19a.2	WBGene00012909	spds-1	SPermiDine Synthase	6.71	4.82	3.79333	3.47	5.12333	5.39	3.62333	3.96667	0.624502	0.00088469	0.153898
Y4C6B.6.1	WBGene00021160	gba-4	Putative glucosylceramidase 4	23.1167	15.0267	7.65667	1.72333	16.69	18.3133	5.74	0.91	0.17727	1.15264e-08	0.171764
Y54G2A.50.1	WBGene00044493	Y54G2A.50		4.85333	3.44667	2.28667	1.90667	4.42	3.21	2.07333	2.38667	0.681274	8.76182e-06	0.407039
Y54H5A.1.1	WBGene00021899	Y54H5A.1		5.13667	2.43667	2.17	1.57333	3.91	1.69667	2.04667	2.65	0.528525	0.00106643	0.232434
Y62E10A.2.1	WBGene00013373	Y62E10A.2		51.46	33.55	35.8333	28.81	45.94	36.0633	27.26	24.68	0.123997	0.000101312	0.21251
Y69E1A.5.1	WBGene00013477	Y69E1A.5		10.3867	3.34667	2.88667	3.38	13.51	3.74	2.43	3.54333	0.384289	9.13614e-06	0.413537
Y69E1A.5.2	WBGene00013477	Y69E1A.5		9.08667	2.21667	3.92667	2.84333	10.3067	2.37	2.96667	2.39667	0.984479	1.28063e-08	0.226452
Y69F12A.2a.1	WBGene00000118	alh-12	ALdehyde deHydrogenase	15.3567	7.58	7.23333	4.04333	10.25	10.3067	6.34333	4.86667	0.292867	3.95867e-07	0.127492
Y69H2.14.1	WBGene00013489	col-42	COLlagen	205.89	24.1167	18.1167	10.16	210.76	25.1867	10.1133	7.00667	0.88065	2.05901e-10	0.115396
Y71D11A.3a.1	WBGene00022104	acsd-1	2-amino-3-carboxymuconate-6-semialdehyde decarboxylase	3.19	1.43	1.54	1.83667	2.72	1.66667	1.29667	1.57	0.128857	5.69355e-07	0.446233
Y97E10AL.3.1	WBGene00022394	natb-1	N-terminal AceTyltransferase B (NatB) complex, catalytic subunit, homolog	34.5133	25.6867	15.7	10.8267	31.3467	24.4533	13.5167	12.0867	0.411916	4.65086e-07	0.378432
ZC262.5.1	WBGene00022582	ZC262.5	Putative ATP synthase subunit epsilon, mitochondrial	17.77	6.35333	6.35333	5.99667	21.0933	6.17667	3.66333	6.02333	0.933964	1.15069e-05	0.831668
ZC376.2a.1	WBGene00013874	ZC376.2		7.12333	6.53	5.93333	3.06	4.95667	8.4	6.20333	2.64667	0.852006	0.000477823	0.150364
ZC395.7.1	WBGene00001823	hap-1	Inosine triphosphate pyrophosphatase	20.1233	13.75	11.8367	11.0233	18.6367	13.6933	10.4633	11.9567	0.581043	3.51875e-05	0.105712
ZC434.7a.1	WBGene00013893	coa-6	Cytochrome Oxidase Assembly subunits	8.49333	7.23333	5.24667	4.75	7.37333	7	5.13667	6.01333	0.923671	0.00465128	0.39846
ZC434.7b.3	WBGene00013893	coa-6	Cytochrome Oxidase Assembly subunits	4.29333	1.95333	1.36333	1.14333	3.47667	1.66	1.59333	1.68	0.789379	0.000180168	0.139811
ZC513.12.1	WBGene00006060	sth-1	Novel protein; SpermaTHecal expression	7.03667	3.74333	4.05667	3.21333	6.6	3.82	2.78333	3.39	0.42428	0.000153863	0.223382
ZC518.1a.1	WBGene00013921	best-22	Bestrophin homolog 22	3.44667	1.71667	1.61667	1.42	2.72333	1.90333	1.31	1.8	0.476719	1.46904e-05	0.575187
ZC8.4a.2	WBGene00022500	lfi-1	Lin-5 (Five) Interacting protein	5.48	1.99	1.66333	1.59667	4.72667	2.00333	1.49	1.17667	0.142986	1.68554e-08	0.276689
ZC8.4d.1	WBGene00022500	lfi-1	Lin-5 (Five) Interacting protein	10.5333	5.97	4.41333	5.27667	10.9	6.95	4.66333	5.10333	0.570334	2.12064e-05	0.279849
ZK1127.10.2	WBGene00022856	cth-2	Putative cystathionine gamma-lyase 2	22.2167	17.03	14.4333	10.3367	23.6433	16.7367	12.4767	10.7933	0.931966	6.30982e-06	0.29679
ZK1193.1.1	WBGene00000608	col-19	Cuticle collagen 19	716.507	116.2	65.2233	43.94	533.33	98.5967	48.8333	45.5733	0.198224	1.15318e-07	0.159258
ZK121.1a.1	WBGene00022663	glrx-21	GLutaRedoXin	34.5833	25.14	21.68	18.09	30.7267	24.5033	16.28	19.9433	0.200494	3.62107e-05	0.14921
ZK154.3.1	WBGene00003171	mec-7	Tubulin beta-1 chain	4.51	2.50667	2.31	2.10333	3.82667	2.81	2.46333	2.01667	0.710365	2.25071e-05	0.501283
ZK20.4a.1	WBGene00013925	coa-7	Cytochrome c oxidase assembly factor 7 homolog	16.1667	10.5533	7.53	6.22333	12.4367	10.24	6.08667	6.24333	0.185784	0.00014493	0.14137
ZK546.14a.1	WBGene00022765	ZK546.14		18.8367	14.56	11.36	9.70667	17.94	13.67	9.02	11.2933	0.563116	0.000269489	0.128644
ZK546.14a.2	WBGene00022765	ZK546.14		14.8333	11.19	8.55667	8.20667	15.7467	11.2433	8.10333	8.77333	0.747464	9.42363e-05	0.614988
ZK593.3.1	WBGene00014003	ZK593.3		8.57	1.23667	2.31	2.01	4.81667	2.22333	2.53333	2.12667	0.622043	0.0365659	0.291118
ZK652.9.1	WBGene00000765	coq-5	2-methoxy-6-polyprenyl-1,4-benzoquinol methylase, mitochondrial	34.9733	22.82	17.33	13.31	30.38	20.2967	14.3367	14.8233	0.104762	1.71592e-07	0.360737
ZK682.2.1	WBGene00022788	slc-17.7	SLC (SoLute Carrier) homolog	2.08333	2.31667	1.69667	1.08333	1.47667	2.09	1.3	1.24	0.238293	0.0277094	0.965218
ZK809.8a.1	WBGene00014088	ZK809.8		14.5333	5.12667	5.2	5.49	13.43	6.14667	4.91333	5.62	0.907905	1.04219e-08	0.138101
ZK856.10.1	WBGene00014111	rpc-25	RNA Polymerase, Class III (C)	28.99	21.24	17.01	15.08	26.8667	21.3067	12.69	16.05	0.328154	2.04039e-05	0.305963
