# Supplementary material for: Systematic transcriptome analysis associated with physiological and chronological aging inCaenorhabditis elegans
Source: HighWire-hosted journal article supplement (doi:10.1101/gr.276515.121), 2022-11-01
Supplement: Supplemental_Table_S2.xlsx [file Supplemental_Table_S2.xlsx]

## Sheet: physiological_temporal_shift_dn
Supplemental Table S2. Age-dependently regulated gene ontology terms associated with physiological or chronological aging
Age-dependently downregulated gene ontology terms associated with physiological aging: temporal shift
NAME	Normalized enrichment						q_value
	WT_d4_vs_WT_d1	WT_d7_vs_WT_d1	WT_d11_vs_WT_d1	daf-2_d4_vs_daf-2_d1	daf-2_d7_vs_daf-2_d1	daf-2_d11_vs_daf-2_d1	WT_d4_vs_WT_d1	WT_d7_vs_WT_d1	WT_d11_vs_WT_d1	daf-2_d4_vs_daf-2_d1	daf-2_d7_vs_daf-2_d1	daf-2_d11_vs_daf-2_d1
GLYCEROLIPID_BIOSYNTHETIC_PROCESS(5)	-0.950371	-1.2402	-1.45266	-1.28208	-1.58674	-1.64384	1	0.350326	0.109401	0.496569	0.0550359	0.058377

## Sheet: physiological_slope_change_up
Supplemental Table S2. Age-dependently regulated gene ontology terms associated with physiological or chronological aging
Age-dependently upregulated gene ontology terms associated with physiological aging: slope change
NAME	Normalized enrichment						q_value
	WT_d4_vs_WT_d1	WT_d7_vs_WT_d1	WT_d11_vs_WT_d1	daf-2_d4_vs_daf-2_d1	daf-2_d7_vs_daf-2_d1	daf-2_d11_vs_daf-2_d1	WT_d4_vs_WT_d1	WT_d7_vs_WT_d1	WT_d11_vs_WT_d1	daf-2_d4_vs_daf-2_d1	daf-2_d7_vs_daf-2_d1	daf-2_d11_vs_daf-2_d1
DEFENSE_RESPONSE_TO_GRAM_POSITIVE_BACTERIUM(6)	1.31612	2.24721	1.88491	1.62254	1.6103	1.24813	0.494196	0	0.0464432	0.174204	0.132528	0.860482
DEPHOSPHORYLATION(6)	-1.46985	-1.19146	0.84297	-1.12998	-0.897781	1.93262	0.161211	0.40202	1	0.718866	0.922498	0.00184214
PROTEIN_DEPHOSPHORYLATION(7)	-1.58254	-1.07801	1.35128	-1.17666	-0.652237	2.33765	0.0800484	0.57297	0.393675	0.651838	1	0
PROTEIN_PHOSPHORYLATION(7)	-1.16502	0.826093	1.5833	0.886969	1.28928	1.86558	0.662431	1	0.248317	1	0.36552	0.00484676

## Sheet: physiological_slope_change_dn
Supplemental Table S2. Age-dependently regulated gene ontology terms associated with physiological or chronological aging
Age-dependently downregulated gene ontology terms associated with physiological aging: slope change
NAME	Normalized enrichment						q_value
	WT_d4_vs_WT_d1	WT_d7_vs_WT_d1	WT_d11_vs_WT_d1	daf-2_d4_vs_daf-2_d1	daf-2_d7_vs_daf-2_d1	daf-2_d11_vs_daf-2_d1	WT_d4_vs_WT_d1	WT_d7_vs_WT_d1	WT_d11_vs_WT_d1	daf-2_d4_vs_daf-2_d1	daf-2_d7_vs_daf-2_d1	daf-2_d11_vs_daf-2_d1
ANTERIOR_POSTERIOR_AXIS_SPECIFICATION(6)	-0.670976	-1.51899	-1.59493	-0.989357	-1.22264	-1.37331	1	0.101601	0.0537125	1	0.323404	0.221249
CELLULAR_COMPONENT_BIOGENESIS(3)	-1.00035	-1.60717	-1.6136	-1.43047	-1.44954	-1.4753	1	0.0676599	0.0487895	0.259911	0.124552	0.139217
CELLULAR_MACROMOLECULAR_COMPLEX_ASSEMBLY(6)	-0.999416	-1.65864	-1.86032	-1.4392	-1.68302	-1.67813	1	0.053184	0.00874216	0.248691	0.0322548	0.0459191
CELLULAR_RESPONSE_TO_DNA_DAMAGE_STIMULUS(5)	0.869319	-1.09422	-1.53226	-0.838774	-1.27207	-1.20109	1	0.550516	0.0745869	1	0.258985	0.415074
CENTROSOME_CYCLE(5)	-0.506607	-1.52967	-1.82756	-1.11427	-1.71617	-1.8581	1	0.0982362	0.0115046	0.743526	0.0249947	0.0153453
CHROMOSOME_ORGANIZATION_INVOLVED_IN_MEIOSIS(5)	0.617617	-1.64792	-1.90143	-1.00352	-1.68806	-1.79939	1	0.0548391	0.00558147	1	0.0312197	0.0202849
CHROMOSOME_SEGREGATION(4)	0.675832	-1.54779	-1.99413	-0.951944	-1.59366	-1.35887	1	0.0895703	0.00265533	1	0.0541555	0.232041
DNA_METABOLIC_PROCESS(5)	0.86862	-1.37021	-1.94756	-1.02895	-1.56946	-1.49839	1	0.221895	0.00324761	1	0.0608572	0.125839
DNA_RECOMBINATION(6)	0.832202	-1.26914	-1.80478	-0.964628	-1.66789	-1.52386	1	0.326214	0.0131064	1	0.0341244	0.112573
DNA_REPAIR(4)	0.82939	-1.2068	-1.62343	-0.947814	-1.35481	-1.21424	1	0.38349	0.0460327	1	0.196578	0.395181
DNA_REPLICATION(6)	1.0841	-1.01704	-1.71679	-0.708569	-1.322	-1.7513	0.724675	0.718926	0.0239858	1	0.224408	0.0279087
MACROMOLECULAR_COMPLEX_SUBUNIT_ORGANIZATION(4)	-0.729879	-1.2873	-1.48698	-1.17601	-1.28624	-1.4024	1	0.301827	0.0988987	0.639744	0.254332	0.190555
MACROMOLECULE_METHYLATION(4)	-0.936538	-1.63682	-1.59006	-1.26573	-1.42042	-1.24998	1	0.0594966	0.0541301	0.5083	0.146719	0.338756
MEIOSIS_I(5)	0.682845	-1.2953	-1.62957	-1.12261	-1.72442	-1.72506	1	0.290513	0.0444329	0.732359	0.0235789	0.0337715
MEIOTIC_CELL_CYCLE_PROCESS(4)	-0.66298	-1.63107	-1.95315	-1.24523	-1.90348	-1.54609	1	0.0607476	0.0032208	0.527222	0.0053268	0.101797
MEIOTIC_CELL_CYCLE(3)	-0.598488	-1.68301	-1.9007	-1.20683	-1.88242	-1.54932	1	0.045544	0.0054985	0.599367	0.00601136	0.10349
MEIOTIC_CHROMOSOME_SEGREGATION(5)	0.557244	-1.65665	-2.06641	-1.15583	-1.80313	-1.52147	1	0.0525718	0.0014212	0.697388	0.0129349	0.112634
METHYLATION(3)	-0.84957	-1.69676	-2.06863	-1.32902	-1.59454	-1.55806	1	0.0415469	0.00139621	0.422747	0.0545083	0.100182
MICROTUBULE_ORGANIZING_CENTER_ORGANIZATION(4)&CENTROSOME_ORGANIZATION(5)	-0.377359	-1.55444	-1.80225	-1.02762	-1.67518	-1.82653	1	0.0867538	0.013431	0.998322	0.0330224	0.0184475
MITOCHONDRION_ORGANIZATION(4)	-1.4364	-2.19214	-2.5451	-1.87427	-2.32577	-2.24549	0.198968	0	0	0.00342818	0	0.000172269
MITOTIC_SISTER_CHROMATID_SEGREGATION(6)	0.984559	-1.21343	-1.60108	-0.582496	-1.20245	-1.34925	0.88494	0.376339	0.0530111	1	0.34245	0.236481
MITOTIC_SISTER_CHROMATID_SEPARATION(6)	0.687954	-1.21367	-1.59089	-0.737796	-1.33393	-1.36254	1	0.378927	0.0545407	1	0.2134	0.230395
MRNA_METABOLIC_PROCESS(6)	-0.555219	-1.35559	-1.56179	-0.995562	-1.34369	-1.43779	1	0.237609	0.0656194	1	0.202555	0.165274
MRNA_PROCESSING(7)	-0.663685	-1.53239	-1.89877	-1.21555	-1.62728	-1.73603	1	0.09803	0.00541124	0.592958	0.0431455	0.0313687
MRNA_SPLICING_VIA_SPLICEOSOME(8)&RNA_SPLICING_VIA_TRANSESTERIFICATION_REACTIONS_WITH_BULGED_ADENOSINE_AS_NUCLEOPHILE(9)	-0.844742	-1.60222	-1.95214	-1.31783	-1.81794	-1.8085	1	0.0691485	0.0031871	0.438813	0.0113625	0.0195646
NCRNA_METABOLIC_PROCESS(6)	-1.90449	-2.74825	-3.04778	-2.30603	-2.80077	-2.79667	0.000801794	0	0	0	0	0
NCRNA_PROCESSING(7)	-1.84878	-2.68146	-2.97265	-2.25461	-2.67688	-2.64416	0.00317471	0	0	0	0	0
NEGATIVE_REGULATION_OF_CELL_CYCLE(4)	-0.361671	-1.33825	-1.53884	-0.604642	-1.08121	-0.965389	0.999765	0.25285	0.0733169	1	0.557494	0.927139
NEGATIVE_REGULATION_OF_MITOTIC_CELL_CYCLE(5)	0.897695	-1.2392	-1.78451	-0.533076	-1.09081	-1.34998	1	0.348818	0.0150401	1	0.534851	0.238124
NUCLEAR_DIVISION(5)	0.588299	-1.41488	-1.82268	-1.02129	-1.64709	-1.48561	1	0.178938	0.0117196	1	0.0368901	0.133567
NUCLEAR_TRANSPORT(6)&NUCLEOCYTOPLASMIC_TRANSPORT(7)	-0.58848	-1.55548	-1.45139	-0.84654	-1.03514	-0.919108	1	0.0875926	0.108951	1	0.648269	0.986666
NUCLEIC_ACID_PHOSPHODIESTER_BOND_HYDROLYSIS(6)	0.725392	-1.37171	-1.64437	-0.989703	-1.30916	-1.17911	1	0.22252	0.0405433	1	0.231887	0.442605
ORGANELLE_FISSION(4)	0.574012	-1.43887	-1.79388	-1.00571	-1.61984	-1.43796	1	0.162407	0.0142875	1	0.0451435	0.167257
ORGANONITROGEN_COMPOUND_BIOSYNTHETIC_PROCESS(5)	-1.33291	-1.8333	-2.03909	-1.54991	-1.77598	-1.72194	0.325586	0.0118004	0.00194795	0.12972	0.0164792	0.0340507
PROTEIN_TARGETING(5)	-1.1447	-1.58933	-1.79079	-1.19166	-1.46014	-1.24976	0.699997	0.0753737	0.0144611	0.629562	0.120862	0.336023
PYRIMIDINE_CONTAINING_COMPOUND_METABOLIC_PROCESS(5)	-0.660116	-1.3545	-1.75587	-1.253	-1.58277	-1.82095	1	0.236451	0.018243	0.518186	0.0556355	0.0185994
RECIPROCAL_MEIOTIC_RECOMBINATION(4)&RECIPROCAL_DNA_RECOMBINATION(7)	0.623883	-1.72132	-2.08652	-1.27818	-1.9087	-1.96536	1	0.0338105	0.00118689	0.500739	0.00504176	0.0060751
REGULATION_OF_CHROMOSOME_ORGANIZATION(5)	0.746617	-1.25777	-1.67015	-0.699573	-1.26572	-1.34794	1	0.325491	0.0338192	1	0.265742	0.235597
REGULATION_OF_CHROMOSOME_SEGREGATION(4)	-0.477766	-1.31557	-1.67726	-0.897374	-1.45863	-1.54893	1	0.271006	0.0324821	1	0.120456	0.10186
RIBONUCLEOPROTEIN_COMPLEX_BIOGENESIS(4)	-1.92106	-2.67682	-2.97336	-2.27031	-2.66712	-2.72423	0.000777296	0	0	0	0	0
RIBOSOME_BIOGENESIS(5)	-1.96359	-2.64169	-2.90568	-2.24685	-2.65115	-2.60125	0.000377507	0	0	0	0	0
RNA_MODIFICATION(6)	-1.47224	-2.30238	-2.58397	-1.92753	-2.31142	-2.28887	0.165227	0	0	0.00203881	0	0
RNA_PHOSPHODIESTER_BOND_HYDROLYSIS_ENDONUCLEOLYTIC(7)	-1.17012	-1.66752	-1.80951	-1.31313	-1.48607	-1.05482	0.658715	0.0505556	0.0127124	0.444283	0.102573	0.686853
RNA_PHOSPHODIESTER_BOND_HYDROLYSIS(6)	-1.20617	-1.87178	-2.09267	-1.45546	-1.76266	-1.54464	0.574711	0.00676038	0.0012204	0.23134	0.0178834	0.101052
RNA_PROCESSING(6)	-1.26926	-2.30343	-2.66438	-1.89663	-2.37718	-2.37016	0.435706	0	0	0.00268972	0	0
RNA_SPLICING_VIA_TRANSESTERIFICATION_REACTIONS(8)	-0.838197	-1.62048	-1.98122	-1.32741	-1.84016	-1.87172	1	0.0620782	0.00281356	0.419981	0.00902292	0.0133027
RNA_SPLICING(7)	-0.755505	-1.57944	-1.95742	-1.29753	-1.81176	-1.81966	1	0.078259	0.00331303	0.458229	0.0120077	0.0181566
SISTER_CHROMATID_SEGREGATION(5)	0.933407	-1.32976	-1.72974	-0.724809	-1.31109	-1.51956	0.980919	0.257179	0.0223349	1	0.231756	0.111964
SYNAPSIS(6)&HOMOLOGOUS_CHROMOSOME_SEGREGATION(6)	-0.706788	-1.57963	-1.77254	-1.14044	-1.66369	-1.589	1	0.0797342	0.0164505	0.701527	0.0340298	0.0845866
TRANSLATION(6)	-1.51159	-2.28436	-2.50995	-1.78036	-2.18104	-2.23929	0.135485	0	0	0.0124312	0.000176539	0.000160784

## Sheet: chronological_dn
Supplemental Table S2. Age-dependently regulated gene ontology terms associated with physiological or chronological aging
Age-dependently downregulated gene ontology terms associated with chronological aging
NAME	Normalized enrichment						q_value
	WT_d4_vs_WT_d1	WT_d7_vs_WT_d1	WT_d11_vs_WT_d1	daf-2_d4_vs_daf-2_d1	daf-2_d7_vs_daf-2_d1	daf-2_d11_vs_daf-2_d1	WT_d4_vs_WT_d1	WT_d7_vs_WT_d1	WT_d11_vs_WT_d1	daf-2_d4_vs_daf-2_d1	daf-2_d7_vs_daf-2_d1	daf-2_d11_vs_daf-2_d1
ENERGY_DERIVATION_BY_OXIDATION_OF_ORGANIC_COMPOUNDS(4)	-1.96443	-2.40106	-2.65761	-2.07354	-2.34739	-2.51312	0.000471884	0	0	0.000140449	0	0
GENERATION_OF_PRECURSOR_METABOLITES_AND_ENERGY(4)	-1.92574	-2.37161	-2.59134	-2.08737	-2.39988	-2.41686	0.000888338	0	0	0	0	0
NUCLEOSIDE_MONOPHOSPHATE_METABOLIC_PROCESS(6)&RIBONUCLEOSIDE_MONOPHOSPHATE_METABOLIC_PROCESS(7)	-1.12608	-1.55999	-1.98057	-1.27235	-1.65642	-1.78444	0.741404	0.0878828	0.00271977	0.511134	0.0351081	0.0227281
