# Supplementary material for: Systematic transcriptome analysis associated with physiological and chronological aging inCaenorhabditis elegans
Source: HighWire-hosted journal article supplement (doi:10.1101/gr.276515.121), 2022-11-01
Supplement: Supplemental_Table_S3.xlsx [file Supplemental_Table_S3.xlsx]

## Sheet: WT_d4_vs_WT_d1
Supplemental Table S3. A3 isoforms that were differentially regulated in wild-type and daf-2 mutant animals in old age compared with those at day 1 of adulthood
A3 isoforms differentially regulated in wild-type (WT) animals at day 4 of adulthood compared with day 1 of adulthood
Isoform_ID: Detected isoform, Gene_ID and Gene_name: A gene contains the isoform, Young: Isoform fraction in young samples, Old: Isoform fraction in old samples, Difference: Old - Young, q_value: Significance of the difference
Nearest_reference_ID: A reference isoform which is the most similar to the detected isoform, Class_code: The type of match between the detected isoform and the reference isoform, A3: The number of A3 in the isoform
Class_code, =: Complete match, j: Potentially novel isoform, o: Generic exonic overlap with a reference, x: Exonic overlap with a reference on the opposite strand, s: Intronic overlaps with a reference intron on the opposite strand
Isoform_ID	Gene_ID	Gene_name	Young	Old	Difference	q_value	Nearest_reference_ID	Class_code	Locus	Strand	A3	A3_genomic_start	A3_genomic_end	Distance_between_adjacent_3′_splice_sites_of_A3	Sequence_between_adjacent_3′_splice_sites_of_A3
TCONS_00014662	XLOC_005606	T15H9.4	0	0.96	0.96	0.00770731	T15H9.4.1	j	II:9607532-9614812	+	1	9611873	9611879	6	TAAATGCAGCTG
TCONS_00049673	XLOC_021609:K08B4.5	K08B4.5	0.061	0.862	0.801	3.37451e-08	K08B4.5	j	IV:6080906-6089578	-	2	6086964;6089407	6086969;6089409	5;2	TATTCTAGGTT;TACAGACG
TCONS_00000774	XLOC_000240	dmsr-2	0.017	0.815	0.798	0.00144646	Y23H5B.4.1	=	I:2533218-2542114	+	1	2541578	2541580	2	TCCAGAGA
TCONS_00064475	XLOC_029422	F53B7.7	0	0.777	0.777	0.00158857	F53B7.7.1	j	V:10998887-10999642	+	1	10999102	10999104	2	TTCAGACA
TCONS_00089238	XLOC_040417	cutl-3	0.056	0.811	0.755	0.00382687	F20D1.8.1	j	X:14994097-14999559	-	2	14996949;14999200	14996950;14999202	1;2	TCAGTAT;CTCAGACC
TCONS_00017185	XLOC_006612:bath-33	bath-33	0.235	0.962	0.728	0.0213765	C08E3.3.1	j	II:1601763-1607766	-	1	1605054	1605055	1	TCAGTTC
TCONS_00082450	XLOC_037666	psa-3	0.033	0.725	0.692	1.67302e-05	F39D8.2b.1	=	X:15407930-15419290	+	1	15408944	15408977	33	TGCATATTGATGGAACTTTTTACTCGACTATTTCAGGGC
TCONS_00048245	XLOC_020706:Y9C9A.16	Y9C9A.16	0.029	0.72	0.69	0.0150499	Y9C9A.16b.1	j	IV:4969839-4976288	-	1	4974554	4974555	1	CTAGTTC
TCONS_00077766	XLOC_035509:F11D5.7	F11D5.7	0.138	0.761	0.623	0.00204098	F11D5.7.1	j	X:3282601-3307095	+	1	3300082	3300083	1	TTAGATG
TCONS_00071573	XLOC_032789:nhr-194	nhr-194	0.058	0.678	0.621	0.00155605	F59E11.8	j	V:8968709-8972714	-	2	8969401;8969985	8969406;8969994	5;9	TATTTCAGATA;TTTTTTTTTCAGATG
TCONS_00034385	XLOC_012988	T08B6.4	0.163	0.761	0.599	0.0612326	T08B6.4.1	j	IV:4905657-4908498	+	1	4906043	4906046	3	CAGTTGGAC
TCONS_00029667	XLOC_011172	pqn-25	0.355	0.953	0.598	0.0270641	D1044.3.1	=	III:5506757-5512602	-	3	5509795;5510893;5511699	5509797;5510894;5511701	2;1;2	TTAAGGTG;CCAGCCG;TCCAGAAT
TCONS_00089049	XLOC_040328	fbxa-141	0	0.578	0.578	0.0165819	D1025.3.1	j	X:14511236-14513107	-	1	14512910	14512912	2	TTCAGATG
TCONS_00049874	XLOC_021728	sams-5	0.014	0.574	0.56	0.0469842	T13A10.11a.1	=	IV:6277390-6279572	-	2	6278699;6279179	6278778;6279184	79;5	CAGGTTCTCTGGGTGACAAGAGGATGAAACTTATCGCAACAATATGTTTCTTTACCTGTTACAACGGTTACTTTGATTACAGAAA;TATTTCAGAAG
TCONS_00072984	XLOC_033430	nphp-4	0	0.538	0.538	0.00155605	R13H4.1.1	=	V:11829581-11843733	-	1	11842802	11842844	42	TAGATGGAAGAACATTCGAAAACCCGAAAAGTACAAAAATTACAGCGC
TCONS_00063329	XLOC_028887	F20D6.5	0.016	0.548	0.531	0.00228793	F20D6.5.1	j	V:8161943-8183442	+	1	8163549	8163553	4	CAGCAATCGA
TCONS_00087340	XLOC_039637	oac-14	0.249	0.774	0.525	0.0501895	F09B9.1a.1	j	X:10139373-10142140	-	1	10141716	10141717	1	TCAGAAC
TCONS_00079384	XLOC_036274:npr-8	npr-8	0.026	0.543	0.517	0.0405151	C56G3.1b.1	=	X:7344046-7388400	+	1	7385949	7385951	2	TTCAGGGA
TCONS_00015413	XLOC_005952	F43G6.4	0.158	0.662	0.504	0.00017961	F43G6.4.1	j	II:11785782-11805924	+	1	11790759	11790761	2	TCCAGGAA
TCONS_00070755	XLOC_032398	gpa-10	0	0.491	0.491	0.0143107	C55H1.2.1	j	V:6850101-6855073	-	3	6853093;6854212;6854404	6853094;6854213;6854405	1;1;1	TCAGGAG;TTAGCGA;TCAGAGC
TCONS_00073580	XLOC_033708	srr-1	0	0.477	0.477	0.00165904	W07G4.6b.1	j	V:13049729-13055413	-	1	13052233	13052235	2	TTCAGAAT
TCONS_00015973	XLOC_006160	Y48E1B.8	0.117	0.585	0.468	1.02836e-08	Y48E1B.8.1	j	II:13585012-13589033	+	1	13587169	13587174	5	CAGAAACCCTT
TCONS_00026090	XLOC_010014:K04H4.5	K04H4.5	0.011	0.477	0.466	0.0260559	K04H4.5.1	j	III:9347713-9365439	+	1	9360269	9360301	32	TTTATTCCCGATTTTACTTTGCCATTTCGTTACAGCGG
TCONS_00031226	XLOC_011781:T26G10.7	T26G10.7	0.309	0.767	0.458	0.0143107	T26G10.7	j	III:9408962-9414602	-	3	9409205;9409400;9409751	9409206;9409401;9409832	1;1;81	TCAGAGA;TCAGAAT;TTCGATTTTTCATATTTTTCTTCAGCAATTCTTTGATTTTTTTGGCAAAAATAATTATTTTCCGTAAATATACTCGTGTTTCAGCAT
TCONS_00075752	XLOC_034689	C08E8.10	0.155	0.612	0.457	0.00304125	C08E8.10.1	j	V:18272563-18350464	-	1	18339905	18339907	2	TCCAGAAA
TCONS_00047548	XLOC_020399	osm-9	0	0.448	0.448	0.0937289	B0212.5.1	=	IV:3550434-3559149	-	4	3555694;3556047;3556186;3556567	3555695;3556048;3556187;3556569	1;1;1;2	TTAGTCC;TTAGGCC;CTAGAGA;TTCAGGCG
TCONS_00009486	XLOC_003617:clp-3	clp-3	0.004	0.444	0.44	0.00114564	Y47H10A.1.1	j	I:12069698-12087964	-	1	12083658	12083659	1	CCAGAGT
TCONS_00087876	XLOC_039832:F46C3.2	F46C3.2	0.374	0.792	0.418	0.00010476	F46C3.2.1	j	X:11416647-11420076	-	2	11418208;11418760	11418209;11418779	1;19	GCAGCAT;TTTGACTTTTGTTCTTTTGCAGAAT
TCONS_00028782	XLOC_010859	Y53G8AL.4	0.325	0.732	0.407	0.0786868	Y53G8AL.4b.1	=	III:3249345-3251246	-	1	3249844	3249996	152	GGCCACGAAATTTTTCTTCGAAAAGCTCCATTTTTCCGCGATTTCGCCGCTGGAAATTAACTTTCGGCCAACGTTTCTGTGAAAATTATTTTTTAAAACTCTAAATATCTGCCAAAAAACCACTGTGGCCTAAACAATTCCATTGATTTTTCCAGTAT
TCONS_00011232	XLOC_004207	bath-47	0.029	0.43	0.401	0.0145769	T07H3.1.1	j	II:1601763-1607766	+	1	1604188	1604194	6	CAGTTCCAGATC
TCONS_00026116	XLOC_010023	F54C8.1	0.035	0.431	0.396	0.0237141	F54C8.1.1	j	III:9434056-9443634	+	1	9439907	9439911	4	CAGATGATGT
TCONS_00028543	XLOC_010791	H14E04.3	0.319	0.71	0.392	5.32187e-05	H14E04.3.1	j	III:2384889-2391489	-	1	2386581	2386582	1	CCAGAAA
TCONS_00078577	XLOC_035910:bus-8	bus-8	0.006	0.389	0.383	0.0301659	T23F2.1.2	j	X:5489726-5496000	+	1	5490506	5491596	1090	TAGATTGCATACAACTGCTGAAAAATCAAACTCCGCAGAAAGGAAATAACGAGTCCGGCTAGTTGCATCGGAATGTGTGATTCGTAACGGACACGCTTTTTCCCGGTTTTTTCGGTTTCATGTATACGCCTAGTTTTTTGAAGCAAGTTGTCAGATATGTATTGCACTTTTTTAAGTATAGAAATTTCCAAACAGTCTGATTTGGGTTAATTGAGCAGTTTCGGACGAAAATACTTTAAGAAGACCATTAAAAAAAAACTGAATTTAACTGCTCTAACGCAATAATGTTTGTTTCAGATGCAATATTCACATTTTTGCAGTTTTCAAATATTTGTAAAAATTTCTTTAAGATACCTTATCATTTCTAGGTAAAACGACAGAATCTGAAGAAAAAACCTT…
TCONS_00042225	XLOC_017237:atln-2	atln-2	0.11	0.49	0.38	0.00513908	Y41E3.3c.1	=	IV:14981555-14996306	+	1	14989742	14989743	1	TCAGGTA
TCONS_00020732	XLOC_008009:cyp-13A1	cyp-13A1	0	0.376	0.376	0.0549901	T10B9.8.1	=	II:9770758-9782495	-	1	9781217	9781218	1	TCAGAAA
TCONS_00032045	XLOC_012104:faah-5	faah-5	0.055	0.43	0.375	0.00139537	Y56A3A.5.1	=	III:11885955-11893022	-	2	11889189;11890342	11889190;11890343	1;1	TCAGATG;TAAGAGG
TCONS_00005153	XLOC_002043	ptr-11	0.239	0.609	0.37	0.018876	F56C11.2a.2	=	I:160171-177586	-	2	163608;166104	163609;166106	1;2	TCAGACC;TTCAGTGA
TCONS_00071754	XLOC_032868	E02C12.8	0.205	0.573	0.368	8.14721e-05	E02C12.8b.1	=	V:9371616-9373804	-	1	9373365	9373366	1	GTAGGGT
TCONS_00026117	XLOC_010023	F54C8.1	0.085	0.446	0.362	0.0709086	F54C8.1.1	j	III:9434056-9443634	+	1	9439907	9439912	5	CAGATGATGTT
TCONS_00018060	XLOC_006916:nep-9	nep-9	0.179	0.537	0.358	0.0714804	F18A12.5.1	j	II:3384234-3399646	-	2	3390390;3394419	3390391;3394420	1;1	CCAGGAC;ACAGAAT
TCONS_00071358	XLOC_032692	F52E1.9	0.384	0.739	0.355	0.00733159	F52E1.9b.1	=	V:8397644-8402669	-	2	8399063;8399348	8399064;8399373	1;25	TCAGGTC;TACATATCAATCCTTTCGTTTTTTGTAGATA
TCONS_00022878	XLOC_008836	dac-1	0.489	0.842	0.354	0.0351752	B0412.1a.1	=	III:815482-821731	+	1	818308	818339	31	AAGAACAGAAAGAGTGTAAAATTAAAAATTCCAGGCG
TCONS_00083429	XLOC_038040	dve-1	0.039	0.392	0.352	0.0261569	ZK1193.5a.2	j	X:427042-437225	-	2	429505;433799	429506;433804	1;5	TCAGCCC;TCATTCAGCTA
TCONS_00025419	XLOC_009744	fbn-1	0.06	0.412	0.351	8.68503e-08	ZK783.1e.1	=	III:7625375-7645837	+	1	7629293	7629299	6	CAGGTCTAGAAA
TCONS_00060701	XLOC_027681:nhr-98	nhr-98	0.05	0.398	0.348	0.00680216	M02H5.6b	=	V:450965-458275	+	1	456006	456050	44	AGCTATTTCACCACCGAAAAATAAAAATTTATAATTTGACGTTTCAGCTT
TCONS_00052069	XLOC_022682:R102.4	R102.4	0.331	0.675	0.344	0.000506561	R102.4a.2	j	IV:10691990-10697491	-	1	10695574	10695581	7	CAGCTTGCAGGAC
TCONS_00036756	XLOC_014409:clec-180	clec-180	0.023	0.362	0.34	0.0143107	F32E10.3a.1	j	IV:7564014-7573761	+	1	7571382	7571389	7	TAGTTTTTAGGAA
TCONS_00083355	XLOC_038022:AC8.1	AC8.1	0.02	0.358	0.338	6.03672e-05	AC8.1	j	X:232874-260160	-	1	250802	250815	13	GATTCTCAAATTCCAGGAT
TCONS_00007585	XLOC_002908	gcsh-2	0.427	0.762	0.335	0.000170597	F52A8.5.2	=	I:7339203-7352235	-	1	7346723	7346745	22	TCCATACAACTATTTTTGTTTTCAGGTA
TCONS_00029742	XLOC_011204:hpo-28	hpo-28	0.129	0.464	0.334	0.0298332	B0336.11a.1	j	III:5706365-5711254	-	1	5708003	5708186	183	CCCATTTTCCATCATCTTGTGTGTGCAGAGGGGGCCACTTGTGTTTAACACTACTCGCTGAACCCCACCACTGGCGATACGAGAATGAACTCTTTCGTGTTGTAACAAGCGGCCGGCTCCTGAGCCGCCTTTCTGACCAGCGCTCCCCGGCTGTTTCTACTCTTACTTTCATTGGTTTTTTTGAAGGAT
TCONS_00016300	XLOC_006302:mltn-9	mltn-9	0.386	0.713	0.326	0.0784592	F19H8.4.1	=	II:14615030-14630121	+	1	14616695	14616697	2	TGAAGGGA
TCONS_00003704	XLOC_001428	B0205.9	0.289	0.606	0.317	0.0347434	B0205.9.1	j	I:10713504-10723496	+	1	10720813	10720815	2	TTCAGGTT
TCONS_00047859	XLOC_020509	F15E6.9	0.001	0.295	0.294	0.0117627	F15E6.9b.1	=	IV:4292868-4299083	-	1	4296026	4296027	1	TCAGGAC
TCONS_00002813	XLOC_001018:ZK265.7	ZK265.7	0.012	0.298	0.287	0.0791336	ZK265.7.1	j	I:8261937-8268990	+	1	8267985	8267986	1	GCAGATA
TCONS_00028618	XLOC_010821	Y71H2AM.15	0.006	0.293	0.287	0.0618844	Y71H2AM.15b.1	j	III:2747114-2756931	-	3	2748714;2749110;2750135	2748715;2749111;2750140	1;1;5	GCAGAAG;GCAGGTG;TTTTCCAGAGT
TCONS_00088774	XLOC_040222	hlb-1	0.027	0.311	0.284	0.0177825	T21H8.1h.1	j	X:13865037-13882693	-	2	13866094;13870376	13866095;13870377	1;1	CCAGATA;ATAGGTA
TCONS_00007615	XLOC_002916	sol-1	0.029	0.306	0.277	0.0460433	C15A11.3.1	=	I:7384397-7395920	-	2	7390296;7395622	7390297;7395623	1;1	TCAGTTG;TCAGGCA
TCONS_00019420	XLOC_007519	B0252.3	0.155	0.431	0.276	0.0044657	B0252.3b.1	=	II:6902094-6907757	-	1	6904680	6904773	93	TGAACACTCTTTCTAGTCGTGAGATTGTTGTGAGATTGTGAGATAGACCATGTTCTCTGAAAATCAAAATTAAAAGTTAAAACACTGTATTTTCAGGCT
TCONS_00086585	XLOC_039306:dim-1	dim-1	0.067	0.343	0.276	0.0667177	C18A11.7a.1	=	X:8050475-8065688	-	1	8057884	8057885	1	TCAGGCT
TCONS_00075129	XLOC_034390	srr-3	0.638	0.914	0.275	0.0991453	F36D3.3.1	=	V:16506896-16508792	-	2	16507663;16507995	16507665;16507996	2;1	TTCAGAAC;TCAGTAA
TCONS_00006515	XLOC_002499	B0041.11	0.079	0.344	0.265	0.0367468	B0041.11.3	j	I:4660829-4663629	-	2	4661154;4662079	4661155;4662089	1;10	ATAGATC;TATTTTTTTACAGATC
TCONS_00072883	XLOC_033384	sipa-1	0.035	0.297	0.262	0.0258488	T27F2.2f.1	j	V:11631433-11637291	-	1	11632664	11632667	3	CAGCAGGTA
TCONS_00061901	XLOC_028227	nhr-181	0.259	0.512	0.253	0.0194459	F38H12.3a.1	j	V:4094942-4100541	+	2	4095040;4097628	4095051;4097629	11;1	TTTATTTACTTCAGAAT;TCAGCTA
TCONS_00030538	XLOC_011500	cdh-3	0.307	0.559	0.253	0.00868209	ZK112.7.1	j	III:7741247-7757487	-	2	7751911;7754463	7751912;7754465	1;2	TCAGATT;TCCAGATC
TCONS_00077854	XLOC_035550	C12D12.1	0	0.247	0.247	0.0536666	C12D12.1a.1	j	X:3499252-3511529	+	1	3501165	3501313	148	ATAGATATGAGTCAGAAATACGGAGAGAATCAGTGTGAAAAGGTTTTTCCCCTGATTGGCCTTACCGTGCTCCACTTTTCCCGTCGCCCGCCATATGGATCACACCGTTCTTATAGCCCTACTACTGGCGTTCTGCTCCACAGCCAGCGCCGTC
TCONS_00071163	XLOC_032597	nipi-4	0.701	0.948	0.247	5.56842e-05	F40A3.5.1	=	V:7868469-7871073	-	1	7870540	7870549	9	AGAGTTTTTAAGAAT
TCONS_00039744	XLOC_015644:sorb-1	sorb-1	0.001	0.243	0.242	0.0424453	Y45F10D.13a.1	j	IV:13750331-13770495	+	1	13769288	13769294	6	AAGTTCCAGGTC
TCONS_00016719	XLOC_006431:C24H12.11	C24H12.11	0.048	0.286	0.238	0.079859	C24H12.11	j	II:416838-453397	-	1	429027	429028	1	ACAGAAA
TCONS_00047583	XLOC_020410:cha-1	cha-1	0	0.238	0.238	0.0320402	ZC416.8b.1	j	IV:3613828-3624697	-	3	3615700;3617241;3617775	3615703;3617243;3617777	3;2;2	GTTTCAGAT;TTCAGACT;TCCAGATG
TCONS_00069457	XLOC_031811	ugt-64	0.226	0.46	0.234	0.0536891	C07G3.9a.2	=	V:3503129-3506352	-	1	3505358	3505361	3	TTTCAGATC
TCONS_00011930	XLOC_004499:bath-29	bath-29	0.494	0.726	0.232	0.0533286	F14D2.4a.1	o	II:3346609-3365961	+	1	3358633	3358640	7	CAGATAATACTGT
TCONS_00037309	XLOC_014617	alp-1	0.058	0.286	0.228	7.11568e-08	T11B7.4d.1	=	IV:8852494-8867765	+	1	8860357	8860546	189	TAGTGAGATCATGGTGGTGAGATGATGACAACAACGAGAATTGAAGTTGAAAAGAAGTATCTGTAGGAGATAATTATTCATTTATTTATGTTTATCATCCGGTGTATTTCAGTAGTATTCTAGTCAAATAAAATTGTTCAATGAGCACGCACTCACCATAATTCCATCATATTCTAACAACATTCTATCTAGGTT
TCONS_00019324	XLOC_007473	T14B4.8	0.762	0.979	0.217	0.0667177	T14B4.8b.1	j	II:6718531-6729422	-	1	6723949	6723951	2	TTTAGAAA
TCONS_00082088	XLOC_037477	jmjd-3.2	0	0.209	0.209	3.48347e-07	F23D12.5.1	j	X:14447671-14453885	+	1	14448774	14448905	131	TAGGGGTCGCAACATGCGGCATTTCTTTAAATTTCCTCAAAAGCTAGTAGATTCTCCAATTGTCAGCACAAATGATTCTGAACCAATTAATGAACAAGTTTATTCAACACAAAGTAATCATGGCGAGCTTCAAGATA
TCONS_00089178	XLOC_040393:C27C12.3	C27C12.3	0.171	0.38	0.209	0.0920687	C27C12.3.1	j	X:14853836-14879124	-	1	14865799	14865800	1	TCAGGTG
TCONS_00081179	XLOC_037044	T08D10.3	0	0.206	0.205	0.0999203	T08D10.3.1	j	X:11954406-11956495	+	1	11955571	11955572	1	CAGGTTG
TCONS_00027725	XLOC_010551	H10E21.5	0	0.2	0.2	0.0973668	H10E21.5.1	j	III:20352-24244	-	1	22724	22725	1	TCAGACT
TCONS_00002843	XLOC_001033	ser-5	0.011	0.209	0.198	0.0194459	F16D3.7.1	j	I:8377600-8392768	+	2	8385730;8386807	8385741;8386813	11;6	AAGTCCATTTTCAGTCC;CAGTTGCAGACA
TCONS_00012207	XLOC_004608:sea-2	sea-2	0	0.187	0.187	0.00258114	K10G6.3g.1	j	II:3936272-3975039	+	1	3950145	3950173	28	AATTTCACCTTTTTTCAAATTTTTTCACAAGTCT
TCONS_00009749	XLOC_003742:F08A8.5	F08A8.5	0	0.187	0.187	0.0507357	F08A8.5b.1	j	I:12946840-12957902	-	2	12954590;12956301	12954592;12956302	2;1	TCCAGAAG;TCAGATC
TCONS_00086345	XLOC_039226:twk-17	twk-17	0	0.18	0.179	0.0653045	C44E12.3b.1	=	X:7599835-7616861	-	4	7601323;7602981;7603466;7603622	7601324;7602982;7603468;7603623	1;1;2;1	CCAGCTC;TTAGGTT;TTCAGTTA;ACAGAGA
TCONS_00039307	XLOC_015428:Y67H2A.7	Y67H2A.7	0.79	0.966	0.176	0.0382072	Y67H2A.7a.1	j	IV:13300827-13310818	+	1	13307113	13307338	225	TTTTGACTGACTGAAATTCTAAAAAATCTCAAAATTATTGGAGTTTTTTATTATTATATTTTTTGCGCGCCGAGGTGTGTCGTTTTTTGTTTTTTCAATGTTTTTTTTAGGGAAAATCAAAAAATCGAGAAAATATATTTTTTTTGAAAAAATCGAAAAACCGACACCCTTGGCCGAAAGTTTTTCAAAAATCTAGTGAAATTACGAGACTTTTCCTTGAAATTTCAGATT
TCONS_00019646	XLOC_007599:kcc-3	kcc-3	0.013	0.189	0.176	0.0026967	K02A2.3b.1	j	II:7425868-7437995	-	5	7427964;7428136;7429243;7429415;7430336	7427965;7428138;7429244;7429416;7430337	1;2;1;1;1	TCAGAGC;TTCAGGAC;TCAGTCT;TCAGAGT;TTAGGTC
TCONS_00083423	XLOC_038039	ZK1193.2	0.654	0.829	0.175	0.079859	ZK1193.2a.1	=	X:406458-425679	-	1	408154	408507	353	AACGACAAAACCCAGAGGAGGCTGTTAATAGACTTCACGGCAGCCGCCGCGATAGGGTTTCCGGCGGTTGTCGTGACATTTGGTTCACGAAAAGTAAAGCGGTCATACCGCTAGTCTATGACGGCTTTAGCCTACGTAAACCCCTACAGCTTGAATTCAGACTAGAAGAGATATAAATGCCGCAAGTAACTCTCTGGTAAATCTCTTGTCCGCAGCAAGCTTTGTCGACTCACTTTTGACCCCAATGGGCAACCTTTACCTTTACTATTAAGCATTGGTGGGACAAAACCGCGCCATAAACAAATATGACTACAAGAACTGCCACTAATCAAGCTTTATCGTACTCTAGTTTTTAGCTA
TCONS_00029451	XLOC_011099	set-2	0.092	0.263	0.17	0.0291212	C26E6.9b.1	=	III:4847008-4947317	-	1	4925737	4925746	9	AAGCCTTCTCAGACT
TCONS_00051514	XLOC_022465	npr-2	0	0.159	0.159	0.0140366	T05A1.1c.1	=	IV:9568600-9586124	-	3	9569406;9570006;9570561	9569407;9570007;9570562	1;1;1	CCAGAAT;TCAGGAA;GTAGAGT
TCONS_00081094	XLOC_037005:C44C10.3	C44C10.3	0	0.152	0.152	0.0667177	C44C10.3.1	j	X:11696473-11704523	+	1	11703464	11703470	6	CAGGGTGAAACT
TCONS_00008344	XLOC_003166	F36H2.3	0	0.151	0.151	0.00242087	F36H2.3c.1	=	I:9250658-9261880	-	3	9255766;9257134;9258996	9255767;9257136;9258997	1;2;1	TCAGGAA;TTAAGATC;TCAGTCG
TCONS_00072559	XLOC_033220	pptr-2	0.11	0.26	0.15	0.0972624	C13G3.3a.2	=	V:11027152-11030917	-	1	11029270	11029282	12	CAGATTTAATTTCAGGGC
TCONS_00075921	XLOC_034779:nhr-170	nhr-170	0	0.145	0.145	0.0658199	C54E10.5.1	j	V:18790706-18802243	-	1	18800820	18800826	6	AATTTTCAGAAT
TCONS_00046753	XLOC_020122	madf-1	0.013	0.158	0.145	0.000139567	Y55F3BR.5a.1	j	IV:794631-833356	-	1	831804	831806	2	TTCAGATG
TCONS_00061061	XLOC_027840:cdc-25.2	cdc-25.2	0.106	0.246	0.14	0.0813084	F16B4.8d	j	V:1567072-1586080	+	1	1582419	1582771	352	ATCAATTTTTTCAACAGCTATAAATTTTAAAACCAAGTTTAACGAACTGTTTTCACCAAAAATTTTTCCTAGAAGGTGTATTTATCTTTCTAATATCAGTCATTCTGCTATCAAATCACCGAAATTTCTGATTTCTGACATTTTCTGCCATTTCCCGTGTTTCGAGACAAAAAACGACCTGAGTAGACCCAAATCTCACCAAGATAGACGTGTCTATTTCTAAATTTTGACCCTCTCTCCCCAGGTGAAAAGTTTCTTTTGGGATGTATTGGGTGGGACCTGAACCGCCTATTCTCAGACCACCAGGCCATCCGTCGTTGCCATTCGTACTCCTTGTGCATTCCAACATTTGCAGAAA
TCONS_00020452	XLOC_007877:T24B8.4	T24B8.4	0.017	0.154	0.138	6.03672e-05	T24B8.4a.1	j	II:9062271-9080230	-	1	9064274	9064461	187	AATGTTTTTAGGGTTACCTTTGAGGCATATTGTGCCTTTTTACTGACTCTATGAAAGACTAGTATATTTAAAAATTTATACAATCTAAGTACACATCAATTTTTACAACATGCATGTATGATCCAACTCCATAAATTTCCAGATTTCTCTTGTTTCTGAGACTTTTCATTTTTAAATCTTAATATTTCAGATC
TCONS_00067851	XLOC_031072:nceh-1	nceh-1	0.01	0.146	0.136	0.00361624	Y43F8A.3a.1	j	V:19371434-19381031	+	1	19377444	19377446	2	TTCAGCGC
TCONS_00020506	XLOC_007903	aqp-2	0	0.134	0.134	2.46528e-05	C01G6.1b.2	j	II:9258912-9262159	-	1	9261979	9261994	15	TTCAATTTGTGATTCCAGGTC
TCONS_00029820	XLOC_011234	dpff-1	0.003	0.126	0.123	1.36496e-10	C28H8.9a.1	j	III:5903551-5917585	-	1	5905906	5905912	6	AAGTTGCAGACT
TCONS_00011008	XLOC_004116:fbxc-40	fbxc-40	0	0.117	0.117	0.00233573	C32B5.1a.1	j	II:985836-991404	+	1	987410	987506	96	CAGTGCTCTTGTGCCCCATAGTCTATACGGCAAACCGGCAAATCGGCAAAGTGCCGGAATTGAAAATTTTCGGCAAATCGGCAAAATGGCAACTTCCAGAAT
TCONS_00034184	XLOC_012884	F28E10.1	0	0.115	0.115	1.14682e-05	F28E10.1j.1	j	IV:4568791-4590473	+	3	4578380;4581357;4585234	4578385;4581365;4585317	5;8;83	CAGGGTGTTCG;TTTTTTTGCAGAAT;TAGTTTTGCCTCTCCGTCTTTATCAATTTCCGCCTGTCTTTCACCCTTGTAGTCACGTCCGTATTCTGTATATTCAGCATTCTCAGGTC
TCONS_00077001	XLOC_035162	ZC13.1	0.836	0.947	0.111	0.0144731	ZC13.1b.2	=	X:877238-879881	+	1	877965	877971	6	TAGTTTCAGGAA
TCONS_00004588	XLOC_001822:ZK1053.4	ZK1053.4	0.01	0.119	0.109	1.20156e-07	ZK1053.4.1	j	I:13241557-13244797	+	1	13241645	13241661	16	TTACAAGTTTTTATTTCAGGTC
TCONS_00083737	XLOC_038139	C46H3.2	0.018	0.125	0.107	0.00536687	C46H3.2a.1	j	X:1211727-1249838	-	1	1219264	1219265	1	CCAGACT
TCONS_00088780	XLOC_040222	hlb-1	0.016	0.122	0.105	0.0277919	T21H8.1j.1	=	X:13865037-13882693	-	2	13866094;13870376	13866095;13870377	1;1	CCAGATA;ATAGGTA
TCONS_00001597	XLOC_000565	kin-32	0.896	1	0.104	1.04616e-06	C30F8.4a.1	=	I:5079905-5093793	+	1	5087988	5087990	2	TGCAGCGT
TCONS_00029633	XLOC_011164	W03A5.6	0.002	0.104	0.103	9.39684e-08	W03A5.6b.1	j	III:5282444-5467992	-	3	5434249;5440211;5440360	5434467;5440215;5440362	218;4;2	TGTTTTTTATTGCTCCAGTTCTGATTTGATCATTCAAACATTTTTGGGCACAACCTAGCTCAAAATGTATGATCTCCAATATACTATTTTTCAGTCTAATTAATTTTGGCACACATGCTGATTTTTGGCTATTTTTACAAGTAAAAAAAGAAGGAACTAGTGATTTTTTTAAATTTGTTTTTTTTATTACCTTTCCTAAAATTATCCTTGATTTATTATAGCTC;AAGTTTCAGA;TTCAGAAA
TCONS_00088779	XLOC_040222	hlb-1	0.061	0.163	0.102	0.0512984	T21H8.1i.1	=	X:13865037-13882693	-	2	13866094;13870376	13866095;13870377	1;1	CCAGATA;ATAGGTA
TCONS_00071903	XLOC_032931:F46B6.5	F46B6.5	0.131	0.03	-0.101	0.0618844	F46B6.5e.1	j	V:9774893-9783062	-	1	9780269	9780425	156	TAGTAGCTTCAGTATCATCACTTCTGGTCAATTGCGATACAACGTACCAACAATTTCATGATGATTTGCAAGAAAAGATATCAAAGTCGCGTAGATCAGCAAATTTGCCCTCATTGTCGCCTGCAAACTCGGAAGAGTATTCCCATAATAATATTCCAGTGA
TCONS_00028565	XLOC_010800	nhr-121	0.106	0.004	-0.102	0.010051	E02H9.8a.2	=	III:2449381-2496712	-	1	2449859	2449865	6	CAGTTTCAGCAA
TCONS_00028430	XLOC_010764	ckr-2	0.131	0.028	-0.103	0.0531273	Y39A3B.5f.1	=	III:2005575-2021595	-	2	2011431;2013842	2011432;2013843	1;1	TTAGAGC;TCAGGTA
TCONS_00064898	XLOC_029642	R13H4.2	0.126	0.021	-0.104	0.00586286	R13H4.2a.1	=	V:11829581-11843733	+	1	11836723	11836725	2	TACAGTAT
TCONS_00088595	XLOC_040151:cyp-13B1	cyp-13B1	0.966	0.855	-0.111	0.0424453	F02C12.5.1	=	X:13406673-13411285	-	2	13407243;13408947	13407244;13408949	1;2	TCAGCGC;TTTAGAAA
TCONS_00087176	XLOC_039591:F36G3.1	F36G3.1	0.115	0.002	-0.113	9.38026e-06	F36G3.1.2	j	X:9780374-9796095	-	2	9782507;9786030	9782508;9786032	1;2	TTAGACG;TTCAGGCG
TCONS_00023681	XLOC_009121	phf-15	0.122	0.002	-0.12	1.31451e-05	Y53G8AR.2a.1	=	III:3311422-3331765	+	2	3323058;3323356	3323075;3323367	17;11	CAGTTTTTCACTGATTTCAGGCT;CAGTTTTTTTTCAGAAA
TCONS_00047200	XLOC_020289:gpx-4	gpx-4	0.124	0.002	-0.122	0.0765192	Y94H6A.4.1	j	IV:2672955-2688816	-	1	2673620	2673635	15	TATATATATATATTTCTAGCC
TCONS_00026532	XLOC_010188	atx-2	0.131	0.003	-0.128	3.49068e-06	D2045.1a.1	=	III:10461346-10468051	+	1	10467304	10467312	8	AAGCTTTGAAGGTG
TCONS_00025041	XLOC_009605	rbf-1	0.128	0	-0.128	0.0247693	F37A4.7b.1	=	III:6669380-6703984	+	1	6699242	6699244	2	TTTAGGTC
TCONS_00031002	XLOC_011689	svop-1	0.132	0	-0.132	0.0129585	ZK637.1.1	=	III:8882641-8886734	-	2	8883488;8884834	8883495;8884835	7;1	GAGTTTGCAGTTT;TCAGATG
TCONS_00074407	XLOC_034015	ZC412.3	0.149	0.004	-0.145	0.0531273	ZC412.3b.3	=	V:14868621-14871547	-	1	14870612	14870613	1	CCAGGTG
TCONS_00020450	XLOC_007877:T24B8.4	T24B8.4	0.204	0.044	-0.16	0.0592837	T24B8.4a.1	j	II:9062271-9080230	-	1	9064274	9064461	187	AATGTTTTTAGGGTTACCTTTGAGGCATATTGTGCCTTTTTACTGACTCTATGAAAGACTAGTATATTTAAAAATTTATACAATCTAAGTACACATCAATTTTTACAACATGCATGTATGATCCAACTCCATAAATTTCCAGATTTCTCTTGTTTCTGAGACTTTTCATTTTTAAATCTTAATATTTCAGATC
TCONS_00037290	XLOC_014613:T28C6.7	T28C6.7	0.172	0.008	-0.164	5.46195e-15	T28C6.7b.1	=	IV:8827437-8842808	+	2	8832844;8836521	8832856;8836563	12;42	AAGTCCCAATTTCAGAGT;CAGCGGCCGCTGTGTGTCGCCTATCGACGGAACTCGCCATTTTAGCCG
TCONS_00075714	XLOC_034677	R10E8.6	0.941	0.775	-0.165	0.0746217	R10E8.6.1	=	V:18258107-18266428	-	3	18260310;18261676;18262967	18260311;18261686;18263108	1;10;141	TCAGCGA;CAGATATTTTCAGGAA;CAGACCGCCCGCTTTTCCAAGAAAGCAATAATTTCAAGGCCGATGCGCAAAAAAAAACGAACATGGACTGGAACACTCTGTTCGCGATTCTTGCCATACCAATAGGAAACATATTGTAATGGAACAAATTGCATTCTCTTCCAGCTC
TCONS_00078381	XLOC_035811	lfi-1	0.246	0.08	-0.166	0.00215891	ZC8.4a.2	=	X:4972569-4997976	+	1	4984775	4984790	15	AAGGGATGAGTACTCCAGGGA
TCONS_00029272	XLOC_011017	ceh-43	0.174	0.004	-0.17	0.00102713	C28A5.4b.1	j	III:4445464-4460822	-	2	4447574;4449943	4447601;4449949	27;6	TAGAGAGCACAACCGATCACTGAATTCCAGGTG;CTTTTTCAGATG
TCONS_00005636	XLOC_002192	Y37E3.30	0.18	0.009	-0.17	0.0544322	Y37E3.30.1	j	I:2149521-2153463	-	1	2150285	2150286	1	TCAGATG
TCONS_00024005	XLOC_009242:hse-5	hse-5	0.888	0.715	-0.173	0.00251837	B0285.5.1	j	III:4341982-4350079	+	1	4346388	4346397	9	AAGATTTTTCAGATG
TCONS_00074679	XLOC_034158	C06B8.2	0.175	0	-0.175	0.0267699	C06B8.2c.2	j	V:15471334-15478699	-	1	15478356	15478360	4	GTTTTAGAAC
TCONS_00013525	XLOC_005142:B0252.1	B0252.1	0.184	0.009	-0.176	0.00337858	B0252.1.1	j	II:6919679-6925951	+	2	6921178;6921524	6921180;6921531	2;7	TACAGAAT;CAGATTTCAGACA
TCONS_00075700	XLOC_034676	R10E8.1	0.182	0	-0.182	0.0257118	R10E8.1a.2	=	V:18242068-18252416	-	1	18243774	18243947	173	GCCGTTTTAGGCTGAGAAAAAAGTAACTTGCTTCGAATTTAATGCGGTCATATTTTTGAATAAAGCGAAGCTCACATCAGCTGGCAATAGTTTTCAACAATATACGTTTACTTTATTCGTGTTGGAAACGTTATCAATGATACACAATGTATTGAAAACTGATTAAAAAATTTCAGAAC
TCONS_00079327	XLOC_036252:syd-9	syd-9	0.189	0.006	-0.183	0.0348469	ZK867.1d.1	j	X:7217804-7226868	+	1	7220711	7220973	262	AAAGAGCAGAAGCTGGTTGTGAGAACAATCAAACGAACAAGATAAAAGGATGACGTCATTGAATGTGTGCCTGTGTGTGACATATGTAAAAGTATTTGAAAGAGATTAGGGATTAGGACTACAGTTCTTGATAGACTTGTAATACAAATTAAAAATTGAGACTTCATGTCTTATATAATCCGCGAACAAGATATTCAGCTAGGATCAGACCGGTTTCATATACCCATAGCAAAGTATAATCTTTTTTATGAATTAATAATTTCAGGCA
TCONS_00079438	XLOC_036305	gly-12	0.211	0.023	-0.188	0.0719683	F48E3.1a.2	=	X:7485856-7493120	+	1	7490326	7490332	6	CAGTTATATGCG
TCONS_00030037	XLOC_011303:let-767	let-767	0.567	0.373	-0.194	0.0288801	C56G2.6a.2	=	III:6338507-6341970	-	1	6339096	6339108	12	AAGTTCTTAACTCAGCTC
TCONS_00086054	XLOC_039113:tyra-2	tyra-2	0.21	0.008	-0.202	0.079859	F01E11.5c.1	j	X:6994783-7011113	-	2	6997902;7001333	6997903;7001338	1;5	ATAGGCG;AAATTCAGCTG
TCONS_00005796	XLOC_002244	F32B5.7	0.211	0.008	-0.203	0.0022068	F32B5.7a.2	=	I:2672939-2683011	-	6	2674464;2674886;2676748;2678055;2679328;2679890	2674466;2674887;2676749;2678056;2679346;2679891	2;1;1;1;18;1	TTCAGATG;TCAGTTC;CTAGGTC;TCAGGTT;GGTAGTTTTTTTTGTTTTCAGGAC;CCAGGCC
TCONS_00070084	XLOC_032084	Y47A7.2	0.206	0.003	-0.203	0.000869387	Y47A7.2.1	j	V:5163268-5213468	-	1	5197588	5197589	1	TCAGACC
TCONS_00005701	XLOC_002218:F23C8.5	F23C8.5	0.667	0.461	-0.206	0.0632525	F23C8.5a.2	=	I:2415132-2421816	-	1	2418848	2418849	1	CCAGGTC
TCONS_00011819	XLOC_004444	lin-8	0.214	0.007	-0.207	4.60197e-08	B0454.1.1	j	II:3055856-3060207	+	1	3056822	3056824	2	TGCAGAAT
TCONS_00021961	XLOC_008489	Y38F1A.8	0.22	0.009	-0.211	0.0367468	Y38F1A.8.1	j	II:12997985-13001083	-	2	12998928;12999299	12998929;12999300	1;1	TCAGATG;TCAGCTC
TCONS_00050434	XLOC_022025	deb-1	0.837	0.62	-0.217	0.0305193	ZC477.9a.1	=	IV:7085215-7094370	-	1	7092524	7092526	2	TTTAGGTC
TCONS_00072557	XLOC_033220	pptr-2	0.329	0.11	-0.219	0.0641469	C13G3.3a.2	=	V:11027152-11030917	-	1	11029270	11029282	12	CAGATTTAATTTCAGGGC
TCONS_00007822	XLOC_003006	lin-10	0.824	0.604	-0.22	0.00295664	C09H6.2a.1	=	I:8109745-8130091	-	1	8118517	8118519	2	TACAGAAA
TCONS_00076916	XLOC_035121	B0310.1	1	0.77	-0.23	0.039737	B0310.1b.1	=	X:492713-497510	+	1	493964	494012	48	GAGATGCGGAACAGTGCATGCCTTGCAAAGATCCACTTTAATAAAATTCAGGAC
TCONS_00035928	XLOC_013961:C49A9.3	C49A9.3	0.23	0	-0.23	2.97843e-05	C49A9.3.1	j	IV:6219559-6225088	+	1	6222391	6222399	8	TAGATTTGCAGAAA
TCONS_00061458	XLOC_028008	F53E10.1	0.981	0.75	-0.231	0.00105618	F53E10.1.1	j	V:2602152-2618554	+	1	2615790	2615793	3	CAGAAGAAC
TCONS_00000235	XLOC_000079:T06A4.3	T06A4.3	0.231	0	-0.231	0.0397908	T06A4.3b.1	=	I:763518-776369	+	1	766324	766326	2	TGCAGCTT
TCONS_00030062	XLOC_011312:atgl-1	atgl-1	0.786	0.555	-0.231	0.042513	C05D11.7a.2	j	III:6406908-6431855	-	1	6424903	6424904	1	TCAGTCA
TCONS_00006527	XLOC_002504	chd-7	0.53	0.295	-0.236	0.00447228	T04D1.4.1	=	I:4685864-4698584	-	1	4697189	4697198	9	AAGTATTTTCAGAAC
TCONS_00085459	XLOC_038857	rgs-6	0.259	0.021	-0.238	0.0260559	C41G11.3a.1	=	X:5720437-5733779	-	2	5724306;5726882	5724307;5726883	1;1	TCAGACA;CCAGATT
TCONS_00071164	XLOC_032597	nipi-4	0.291	0.052	-0.239	0.00213473	F40A3.5.2	=	V:7868469-7871073	-	1	7870540	7870549	9	AGAGTTTTTAAGAAT
TCONS_00020861	XLOC_008053	die-1	0.244	0.003	-0.241	6.69887e-10	C18D1.1a.1	=	II:10061286-10074960	-	1	10064502	10064504	2	TTCAGTCA
TCONS_00068825	XLOC_031487	nhr-179	0.244	0.001	-0.243	0.0784779	F16B4.11f	=	V:1612802-1639300	-	1	1616773	1616910	137	TAACATTTGCAAAACTACACAAAAATTTTACTTTAATGACAATTCAAATTTATTCGCTTCAAGAAATTTGCGCTAATATATCAGACTGTAGAATCACTTCTTGGCATCAGTAATTTAATTATTCTACTTGAAAATCGAAGTGA
TCONS_00005049	XLOC_002003:unc-122	unc-122	0.253	0.008	-0.245	0.069447	F11C3.2.1	j	I:14867857-14875531	+	1	14872380	14872387	7	CAGACTCTTCACT
TCONS_00071750	XLOC_032868	E02C12.8	0.367	0.121	-0.245	0.079859	E02C12.8c.1	=	V:9371616-9373804	-	1	9373365	9373366	1	GTAGGGT
TCONS_00004804	XLOC_001902:Y71A12B.13	Y71A12B.13	0.274	0.028	-0.246	0.00102713	Y71A12B.13a	j	I:13953543-13990100	+	1	13967596	13967603	7	TAGCTTCCAGATC
TCONS_00019529	XLOC_007558	C27H5.4	0.271	0.024	-0.247	2.97843e-05	C27H5.4c.1	=	II:7162443-7166877	-	1	7163878	7163879	1	TTAGGGT
TCONS_00015831	XLOC_006116	F42G4.5	0.938	0.687	-0.251	0.010941	F42G4.5b.1	=	II:13073492-13076223	+	1	13073669	13073769	100	AAAATGTCTCCTCCTCTTCCCCACTGTTTAAGCCGATTGCTGAAATTGAATCGGTTTCCCATTCCCAGTCATTCTTTCTTTATGAGTTTTCTTACCGTTCCAGGTG
TCONS_00082496	XLOC_037683	eat-20	0.592	0.334	-0.258	0.0680064	H30A04.1a.1	=	X:15506036-15524020	+	1	15522926	15522932	6	CAGTTCCAGAAT
TCONS_00071005	XLOC_032502	fbxa-105	0.274	0.015	-0.259	0.051293	C02H6.2.1	j	V:7390528-7392973	-	1	7392027	7392111	84	AACAGTTTGAATTTCATGACACACATTGTTCTCGTTTGGTTTTTTTGTGTCTAAAATTAAAATAATTGCCTTTTTCTGCAATTCCAGAAA
TCONS_00037308	XLOC_014617	alp-1	0.471	0.211	-0.26	4.44624e-07	T11B7.4b.1	=	IV:8852494-8867765	+	1	8860357	8860546	189	TAGTGAGATCATGGTGGTGAGATGATGACAACAACGAGAATTGAAGTTGAAAAGAAGTATCTGTAGGAGATAATTATTCATTTATTTATGTTTATCATCCGGTGTATTTCAGTAGTATTCTAGTCAAATAAAATTGTTCAATGAGCACGCACTCACCATAATTCCATCATATTCTAACAACATTCTATCTAGGTT
TCONS_00033834	XLOC_012743	glct-6	0.415	0.145	-0.27	0.000849286	W07G9.2b.1	j	IV:3761191-3801798	+	1	3792198	3792203	5	CAGGCAAACCG
TCONS_00016856	XLOC_006474:snt-6	snt-6	0.307	0.034	-0.273	0.000659588	C08G5.4a.1	=	II:723787-768176	-	1	749585	749586	1	CCAGATA
TCONS_00086893	XLOC_039444	M02D8.5	0.838	0.563	-0.275	0.0397959	M02D8.5.1	=	X:8754568-8761616	-	2	8754777;8756426	8754778;8756427	1;1	TCAGCTG;TCAGGAA
TCONS_00038162	XLOC_014945	epi-1	0.394	0.119	-0.276	0.0680871	K08C7.3f.1	=	IV:10666515-10681756	+	1	10677673	10677674	1	AAAGATG
TCONS_00016298	XLOC_006302:mltn-9	mltn-9	0.316	0.035	-0.281	0.000134787	F19H8.4.1	j	II:14615030-14630121	+	1	14616695	14616697	2	TGAAGGGA
TCONS_00073979	XLOC_033851	T26F2.2	0.775	0.481	-0.294	0.0653045	T26F2.2	=	V:13981262-13983241	-	3	13981792;13981983;13982551	13981793;13981984;13982552	1;1;1	CTAGGTC;ACAGAAA;TAAGGTG
TCONS_00003941	XLOC_001525:nhr-74	nhr-74	0.643	0.348	-0.296	0.0666875	C27C7.3.1	j	I:11422189-11432145	+	1	11431885	11431886	1	TCAGAAG
TCONS_00039098	XLOC_015353:K08D8.1	K08D8.1	0.311	0.015	-0.296	0.0370226	K08D8.1.1	j	IV:12892460-12896383	+	1	12894259	12894629	370	CAGGTGTCCTGCTACATAAGATGTATTCCCATTGCAATTTTCATGGTTATTGTTATCGGATTCATTGCAACAGTAATATTGATGCTGATCCAACTTTAACATGAACTCTTTGCTTTATGTGTCTTGAAGTAGAGCCCATTAAATTAATGAAGTCGTTCTTCAATTCTATCCCTGCCAACACACAACAATAGAAAAAAAACAATAGAAAAATTTATTTCAAAAAAATTTGGGCACTTAAATTTTTCTGTTAACTTTGAATTCCAAACATCAAAACTATAAGATACATAATGTCGCCTGCGTCTAATAGATTATTAAAACCTAAAAGACTATTAGATAACCTAAATAAGCCCGGCATATTCACACTACTTTTCAGGTG
TCONS_00060450	XLOC_027586	F11E6.8	0.334	0.025	-0.309	0.0050553	F11E6.8a.1	=	IV:17444124-17457483	-	4	17444836;17445644;17446610;17449707	17444837;17445646;17446611;17449708	1;2;1;1	TCAGTTA;TTTAGGTG;ACAGTAT;ACAGTTA
TCONS_00020687	XLOC_007999	glt-5	0.309	0	-0.309	0.00214692	Y53C12A.2.1	j	II:9706482-9708890	-	1	9707415	9707417	2	TTCAGGAT
TCONS_00029741	XLOC_011204:hpo-28	hpo-28	0.775	0.461	-0.314	0.0382072	B0336.11a.1	=	III:5706365-5711254	-	1	5708003	5708186	183	CCCATTTTCCATCATCTTGTGTGTGCAGAGGGGGCCACTTGTGTTTAACACTACTCGCTGAACCCCACCACTGGCGATACGAGAATGAACTCTTTCGTGTTGTAACAAGCGGCCGGCTCCTGAGCCGCCTTTCTGACCAGCGCTCCCCGGCTGTTTCTACTCTTACTTTCATTGGTTTTTTTGAAGGAT
TCONS_00005435	XLOC_002120:Y48G8AL.10	Y48G8AL.10	0.408	0.085	-0.323	0.00805002	Y48G8AL.10a.1	j	I:1136370-1156454	-	1	1154386	1154387	1	GCAGAAA
TCONS_00009031	XLOC_003437	C35E7.10	0.701	0.373	-0.327	0.0504747	C35E7.10a.1	=	I:10810647-10815693	-	1	10811309	10811310	1	TCAGGTC
TCONS_00084936	XLOC_038652	lst-2	0.331	0	-0.331	4.60197e-08	R160.7.1	j	X:4378003-4383371	-	2	4379282;4382139	4379290;4382140	8;1	TAGTTTATCCAGGT;TCAGCAA
TCONS_00073903	XLOC_033818	F20G2.1	0.499	0.167	-0.332	0.0289552	F20G2.1.1	=	V:13752200-13754958	-	1	13752876	13752877	1	TAAGGTT
TCONS_00061902	XLOC_028227	nhr-181	0.661	0.325	-0.336	0.0232412	F38H12.3a.1	=	V:4094942-4100541	+	1	4097628	4097629	1	TCAGCTA
TCONS_00031218	XLOC_011781:T26G10.7	T26G10.7	0.347	0.008	-0.338	0.00382687	T26G10.7	=	III:9408962-9414602	-	2	9409205;9409369	9409206;9409401	1;32	TCAGAGA;TCAGAATCAACAGGACACTCCCATCCAAACTCCAGAGA
TCONS_00047082	XLOC_020239	M70.3	0.35	0.008	-0.343	0.0872358	M70.3a.1	=	IV:2237130-2243041	-	2	2240731;2241424	2240733;2241428	2;4	TTCAGATT;TTTTCAGCTT
TCONS_00087825	XLOC_039820	gcy-9	0.371	0.019	-0.352	0.0205584	ZK455.2.1	j	X:11160980-11392852	-	9	11332606;11333453;11333999;11335185;11335533;11335666;11336067;11336461;11337375	11332608;11333455;11334002;11335189;11335534;11335667;11336069;11336462;11337391	2;2;3;4;1;1;2;1;16	TACAGGGA;TTTAGATC;TTTCAGTTA;TCTTCAGAAA;TTAGATT;ACAGGTA;TTCAGCAA;TCAGATT;TAGTAATTCTTTTTTCTCAGAA
TCONS_00028546	XLOC_010791	H14E04.3	0.356	0.002	-0.354	0.0968584	H14E04.3.1	j	III:2384889-2391489	-	1	2386581	2386582	1	CCAGAAA
TCONS_00068888	XLOC_031511	F36H9.5	0.361	0	-0.361	0.0856337	F36H9.5.1	j	V:1779631-1782022	-	2	1780976;1781155	1780977;1781157	1;2	TCAGAAA;TTCAGACC
TCONS_00059141	XLOC_026775:VY10G11R.1	VY10G11R.1	0.406	0.041	-0.364	0.0596986	VY10G11R.1.1	j	IV:16467976-16471447	-	1	16469378	16469391	13	TAGCTTGACATTATAGATA
TCONS_00077814	XLOC_035525	ZK563.2	0.781	0.399	-0.382	0.00549819	ZK563.2.1	j	X:3368745-3375044	+	1	3371765	3371769	4	TTTTCAGAAA
TCONS_00014691	XLOC_005618	shk-1	0.489	0.103	-0.385	0.00489545	ZK1321.2d.2	j	II:9721010-9768271	+	1	9758234	9758237	3	TAGCAGGCG
TCONS_00064469	XLOC_029421	frpr-9	0.393	0	-0.393	0.0373314	F53B7.2a.1	j	V:10992041-10995165	+	1	10993186	10993189	3	CAGTAGATT
TCONS_00047013	XLOC_020211	snn-1	0.822	0.416	-0.407	0.00367222	Y38C1BA.2b.1	=	IV:1805036-1815107	-	2	1806501;1806795	1806502;1806797	1;2	CCAGGTG;TCCAGCAC
TCONS_00071959	XLOC_032950:clp-9	clp-9	0.43	0.006	-0.424	9.07856e-06	T11A5.6c.1	=	V:9882033-9886474	-	1	9885231	9885513	282	TAGTCCTATACAAATGCAATATATCAGTTGCTTAATTCTACAAAGAAAACAATGAAACCAAGTAGTTTAAGTTAAACCCTAGGATTTAAAACTTGATATTAAAATTGAGATTTGACAATCTTTTTACGAACAGCAAAGCTCCTTTCCTGTGCAAGGGTAATTGCAATCTAAAATTTTTAAAAAGTGCAGCTTTTCATGACTTTTGTCAATAGAAAATTATTCTAAAATGGCATTTTAAAATTTTCAAGAAAAGTGTATGTGTTCGGGCGTAGGAAATATTTTAAGATC
TCONS_00060887	XLOC_027763:H24K24.2	H24K24.2	0.559	0.111	-0.448	0.000955892	H24K24.2a.1	j	V:916439-945587	+	1	919705	919706	1	TCAGACA
TCONS_00077111	XLOC_035205	dop-4	0.938	0.486	-0.452	0.0279136	C52B11.3.1	j	X:1276732-1299072	+	1	1297567	1297573	6	CAGTTGCAGGTA
TCONS_00076556	XLOC_034985	B0250.4	0.484	0.029	-0.455	0.000252142	B0250.4	j	V:20457915-20468235	-	1	20464492	20464706	214	CTAATTCAGTTCAAGAAAAATTATTTAAAGGAGGACTAACGGTTCGGACGATTTTGTATTGACCCAAAATGGGCTCAAATGAACGAATTTCACAATAAAACTTTTCAAAATTTTTTACGTCAGTTCTAGGGAACTTTTCTACTTTTTGACTTGTACATAATAGTAAAATATAATAGACAACAATAATATTATTATTATTAGCGAATTTTTTTTTCAGCGT
TCONS_00038790	XLOC_015240	F35G2.1	0.76	0.3	-0.46	1.05304e-06	F35G2.1a.2	j	IV:12194527-12207956	+	1	12203227	12203249	22	AAAAATTAAATAAAGTTTCTTTCAGAAT
TCONS_00090085	XLOC_040757	T25G12.11	0.944	0.482	-0.462	0.0210233	T25G12.11.1	j	X:17236910-17239294	-	1	17237191	17237201	10	CAGAGATATGCAGCGG
TCONS_00027780	XLOC_010573:F40G9.9	F40G9.9	0.861	0.389	-0.472	0.00208458	F40G9.9.1	=	III:170219-184915	-	1	171521	171525	4	TTTTCAGAAA
TCONS_00029813	XLOC_011233	pxl-1	0.672	0.197	-0.474	0.0118048	C28H8.6a.1	j	III:5889720-5901669	-	1	5894130	5894292	162	AGAGAAAAGGAGCAGCACACCTTTTTCTTTTCCACGCACACAACACTTTTACCTATCACTTGGCGGAATGATGCGCGAGTTGCAACAACGGCTTGACCATTTCAATGGTCCAAATTATGCACAAAATAGTCATTCAAACCACCAACAACATCATTCGGTTTATAGCTC
TCONS_00051551	XLOC_022482	del-2	0.665	0.183	-0.481	0.000252142	F58G6.6b.1	=	IV:9636912-9642084	-	3	9638173;9639187;9640218	9638174;9639190;9640219	1;3;1	GAAGGTC;TTTCAGATT;CCAGGGA
TCONS_00087877	XLOC_039832:F46C3.2	F46C3.2	0.489	0.001	-0.488	8.73467e-07	F46C3.2.1	=	X:11416647-11420076	-	1	11418208	11418209	1	GCAGCAT
TCONS_00030093	XLOC_011324	acr-5	0.757	0.266	-0.491	0.0504747	K03F8.2.1	j	III:6508131-6514776	-	2	6510922;6512362	6510923;6512363	1;1	TCAGCAC;TTAGATA
TCONS_00069648	XLOC_031885:cyp-34A6	cyp-34A6	0.763	0.267	-0.496	0.0262348	B0213.11a.1	=	V:3957842-3963817	-	1	3960345	3960346	1	TCAGGAC
TCONS_00000776	XLOC_000240	dmsr-2	0.5	0	-0.5	0.0331514	Y23H5B.4.1	j	I:2533218-2542114	+	1	2541578	2541580	2	TCCAGAGA
TCONS_00071766	XLOC_032873	F36D4.4	0.806	0.306	-0.5	0.0210233	F36D4.4a.1	=	V:9400326-9414518	-	1	9403467	9403473	6	TAGTCTCAGGGG
TCONS_00009484	XLOC_003617:clp-3	clp-3	0.529	0.022	-0.507	0.000277967	Y47H10A.1.1	j	I:12069698-12087964	-	1	12083658	12083659	1	CCAGAGT
TCONS_00017186	XLOC_006612:bath-33	bath-33	0.556	0.038	-0.519	0.0824824	C08E3.3.1	=	II:1601763-1607766	-	1	1605054	1605055	1	TCAGTTC
TCONS_00068417	XLOC_031311:R02C2.1	R02C2.1	0.838	0.3	-0.538	0.00566275	R02C2.1.1	=	V:228857-240530	-	1	237318	237319	1	CCAGAAA
TCONS_00028317	XLOC_010722	Y22D7AL.11	0.567	0.017	-0.55	0.000391921	Y22D7AL.11.1	j	III:1626631-1637561	-	1	1631682	1631683	1	TCAGGTG
TCONS_00070759	XLOC_032398	gpa-10	0.872	0.322	-0.551	0.0397908	C55H1.2.1	=	V:6850101-6855073	-	4	6853093;6853647;6854212;6854404	6853094;6853648;6854213;6854405	1;1;1;1	TCAGGAG;TCAGTTT;TTAGCGA;TCAGAGC
TCONS_00083739	XLOC_038140	C25G6.3	0.855	0.281	-0.574	0.0096742	C25G6.3.1	j	X:1211727-1249838	-	1	1237420	1237421	1	TCAGCTT
TCONS_00011757	XLOC_004409:ZK355.2	ZK355.2	0.579	0.003	-0.576	1.96118e-05	ZK355.2b.2	=	II:2921102-2928199	+	1	2924042	2924059	17	CAGCCTTGTTGTAATTTCAGACG
TCONS_00071574	XLOC_032789:nhr-194	nhr-194	0.587	0	-0.587	3.81543e-06	F59E11.8	j	V:8968709-8972714	-	2	8969401;8969985	8969406;8969994	5;9	TATTTCAGATA;TTTTTTTTTCAGATG
TCONS_00088875	XLOC_040267	F16B12.4	0.864	0.256	-0.607	0.0632525	F16B12.4.1	j	X:14085067-14107905	-	1	14098662	14098664	2	TTCAGCAA
TCONS_00000996	XLOC_000337	fog-1	0.777	0.152	-0.624	8.30833e-28	Y54E10A.4b.1	j	I:3211045-3228478	+	1	3212990	3212994	4	CAGATGGAAA
TCONS_00073109	XLOC_033486:kmo-2	kmo-2	0.659	0.025	-0.634	0.00466224	R07B7.4b.1	j	V:12065588-12071692	-	1	12067947	12067957	10	ACAATGCCGTCAGTTG
TCONS_00086068	XLOC_039115	R173.3	0.9	0.23	-0.67	0.0182445	R173.3.2	j	X:7030224-7036673	-	1	7035867	7035868	1	CCAGTTG
TCONS_00017695	XLOC_006775	F22E5.13	0.802	0.046	-0.756	0.0754413	F22E5.13.1	=	II:2647324-2654985	-	2	2648590;2648802	2648636;2648803	46;1	GTCAGTTTTTTGCTAAAAAGTATAACAATAATTAAAAAATATAATTCAGAAT;TCAGAAC
TCONS_00035584	XLOC_013737	H32C10.1	0.773	0.002	-0.77	0.0179364	H32C10.1b.1	=	IV:5934345-5941599	+	2	5934444;5935004	5934446;5935019	2;15	TTCAGTGT;CAGAATAATTTTTTTCAGAGT
TCONS_00000291	XLOC_000099:nas-30	nas-30	0.911	0.108	-0.804	0.043795	Y95B8A.1.1	j	I:936661-947710	+	1	943664	943666	2	TCCAGCCG
TCONS_00063330	XLOC_028887	F20D6.5	0.814	0.003	-0.811	1.83416e-13	F20D6.5.1	j	V:8161943-8183442	+	1	8163549	8163550	1	CAGCAAT
TCONS_00032778	XLOC_012366	inx-18	0.906	0.043	-0.863	0.022773	C18H7.2a.1	=	IV:606354-614040	+	1	610909	610911	2	TTCAGTCG

## Sheet: WT_d7_vs_WT_d1
Supplemental Table S3. A3 isoforms that were differentially regulated in wild-type and daf-2 mutant animals in old age compared with those at day 1 of adulthood
A3 isoforms differentially regulated in wild-type (WT) animals at day 7 of adulthood compared with day 1 of adulthood
Isoform_ID: Detected isoform, Gene_ID and Gene_name: A gene contains the isoform, Young: Isoform fraction in young samples, Old: Isoform fraction in old samples, Difference: Old - Young, q_value: Significance of the difference
Nearest_reference_ID: A reference isoform which is the most similar to the detected isoform, Class_code: The type of match between the detected isoform and the reference isoform, A3: The number of A3 in the isoform
Class_code, =: Complete match, j: Potentially novel isoform, o: Generic exonic overlap with a reference, x: Exonic overlap with a reference on the opposite strand, s: Intronic overlaps with a reference intron on the opposite strand
Isoform_ID	Gene_ID	Gene_name	Young	Old	Difference	q_value	Nearest_reference_ID	Class_code	Locus	Strand	A3	A3_genomic_start	A3_genomic_end	Distance_between_adjacent_3′_splice_sites_of_A3	Sequence_between_adjacent_3′_splice_sites_of_A3
TCONS_00063931	XLOC_029179:her-1	her-1	0.01	0.955	0.944	7.76777e-10	ZK287.8a.1	j	V:9692898-9702041	+	1	9700772	9700774	2	CAGACTCC
TCONS_00001576	XLOC_000554	sst-20	0.066	1	0.934	0.0700346	F54C1.9.2	=	I:5006705-5007991	+	1	5006825	5006829	4	CAGGAAAAGA
TCONS_00065672	XLOC_029990	scl-16	0.051	0.862	0.811	0.0545242	F35E12.1	j	V:13711359-13727024	+	1	13721249	13721259	10	GCATTCAGTCCAGCTG
TCONS_00070006	XLOC_032048	ncx-9	0	0.796	0.796	0.000106145	C13D9.8.1	j	V:4943115-5053490	-	1	4995162	4995214	52	TACATGGGGAAACTGAAATGGTTTTCGTGGATTCTTATATTTTGTTTTTTGATAGAAG
TCONS_00082655	XLOC_037756	col-186	0.001	0.796	0.794	0.0768698	E03G2.4.1	=	X:15950405-15954884	+	1	15952374	15952376	2	CCCAGAAT
TCONS_00017185	XLOC_006612:bath-33	bath-33	0.235	1	0.765	0.000951634	C08E3.3.1	j	II:1601763-1607766	-	1	1605054	1605055	1	TCAGTTC
TCONS_00075125	XLOC_034389	nhr-54	0	0.739	0.739	0.0122908	F36D3.2.1	j	V:16503944-16506748	-	2	16504471;16505924	16504472;16505925	1;1	TCAGACT;CAAGTTT
TCONS_00017951	XLOC_006879:sdz-35	sdz-35	0.078	0.781	0.703	0.021863	ZC239.12.1	=	II:3205678-3211381	-	1	3208218	3208219	1	TCAGCCG
TCONS_00078061	XLOC_035646	R02E4.2	0.028	0.727	0.699	0.0357828	R02E4.2.1	=	X:4106944-4111595	+	1	4109585	4109586	1	TTAGGCC
TCONS_00065117	XLOC_029732	F55C5.10	0.129	0.826	0.697	0.0059817	F55C5.10.1	j	V:12282741-12283999	+	1	12283487	12283489	2	TTCAGTTT
TCONS_00019650	XLOC_007599:kcc-3	kcc-3	0.06	0.753	0.693	0.0391416	K02A2.3a.1	=	II:7425868-7437995	-	6	7426414;7427964;7428136;7429243;7429415;7430336	7426421;7427965;7428138;7429244;7429416;7430337	7;1;2;1;1;1	AAATTTCCAGAAG;TCAGAGC;TTCAGGAC;TCAGTCT;TCAGAGT;TTAGGTC
TCONS_00069142	XLOC_031622	F53E10.5	0	0.683	0.683	0.0623681	F53E10.5.1	=	V:2592486-2601738	-	1	2597018	2597190	172	CAGTTATTTTGGAACCAACGGAGTGGTTTTTAACAATTTCCCCACTGGCGCTACTCCACCTTTAAAATTTCAAATCTGCCAACCCACTCTCCGAACCCTGTGTACAGAAGAACTACGAAGAACAACATTCCGAATATTGGCAGAATAAAGAAGAATGTTGCTCAAAAGTTTTCAGAAC
TCONS_00015973	XLOC_006160	Y48E1B.8	0.117	0.791	0.674	4.95378e-17	Y48E1B.8.1	j	II:13585012-13589033	+	1	13587169	13587174	5	CAGAAACCCTT
TCONS_00087167	XLOC_039587:slc-17.9	slc-17.9	0.185	0.825	0.64	0.0519898	T09B9.2.1	=	X:9761482-9776066	-	1	9763655	9763657	2	TTCAGAGT
TCONS_00018333	XLOC_007032	R03H10.7	0.029	0.662	0.633	0.00049454	R03H10.7.1	j	II:4169361-4183545	-	1	4178039	4178040	1	ACAGTCA
TCONS_00028613	XLOC_010820	Y71H2AM.14	0.026	0.657	0.63	0.0179799	Y71H2AM.14a.1	j	III:2743718-2746653	-	1	2744678	2744685	7	CAGATCCTAGCAC
TCONS_00000774	XLOC_000240	dmsr-2	0.017	0.638	0.621	2.5074e-06	Y23H5B.4.1	=	I:2533218-2542114	+	1	2541578	2541580	2	TCCAGAGA
TCONS_00079393	XLOC_036279	gad-2	0.153	0.771	0.618	0.0261179	C10A4.5.1	=	X:7393139-7403611	+	2	7393917;7395394	7394148;7395396	231;2	TATATGTGTCGCGTCAACTAGACGTTCTTGCTTTGATCAGCCTTGATATAGGTTATACCGATAATCTGTTAGTCTCTCTTTTCGAATGTGACCACTATCTCTTTTTTCTGTTAGCTTAACAAAAAAGCTACGTCTTCCACAAACCACTTACCAATATTTTTGAAGGCCAAGGTCACATGCCTTAACAATAATTTTTCCTTTCCTTGATGCTAACCCATGCTCAATGTATTTTAGGTA;TTCAGAAT
TCONS_00077008	XLOC_035165	F35H12.6	0	0.611	0.611	0.0749356	F35H12.6.1	j	X:908802-914858	+	1	913290	913292	2	TATAGGTT
TCONS_00002162	XLOC_000775	T10E9.4	0.043	0.632	0.589	0.0856259	T10E9.4.1	j	I:6521828-6528865	+	1	6525045	6525058	13	AACAATCATTTTGAAGCAA
TCONS_00048245	XLOC_020706:Y9C9A.16	Y9C9A.16	0.029	0.606	0.576	0.00825454	Y9C9A.16b.1	j	IV:4969839-4976288	-	1	4974554	4974555	1	CTAGTTC
TCONS_00078863	XLOC_036032	ggr-2	0	0.57	0.57	0.0375866	C45B2.4a.1	j	X:6070496-6081860	+	1	6075509	6075580	71	CTTCTATTGCTATGAAGCTCTCGCCTATCTCACTTTAATGTTTTTCGAAGTCCGACTGTGAATTCAATCTTCAGAGG
TCONS_00037752	XLOC_014756:sdz-36	sdz-36	0.093	0.664	0.57	0.0334528	ZK1251.7.1	o	IV:9687048-9691897	+	1	9690862	9690934	72	TAGAATATAGCTAAAATCGTTTTTATTGAGTGTTGCGTCTACCGTGTTGAAATCGTACATTTTTCCATACTTCAGAGC
TCONS_00071754	XLOC_032868	E02C12.8	0.205	0.751	0.546	8.18185e-07	E02C12.8b.1	=	V:9371616-9373804	-	1	9373365	9373366	1	GTAGGGT
TCONS_00089238	XLOC_040417	cutl-3	0.056	0.591	0.535	6.94732e-05	F20D1.8.1	j	X:14994097-14999559	-	2	14996949;14999200	14996950;14999202	1;2	TCAGTAT;CTCAGACC
TCONS_00046835	XLOC_020145	C44B12.6	0.175	0.703	0.528	0.0190533	C44B12.6d.1	j	IV:1128875-1138418	-	1	1132233	1132235	2	TTCAGATC
TCONS_00085272	XLOC_038783	C26B9.6	0.04	0.565	0.525	0.0768698	C26B9.6.1	j	X:5332365-5342202	-	2	5334571;5334686	5334572;5334687	1;1	TCAGTGA;TCAGGCG
TCONS_00071682	XLOC_032842	F07C3.3	0.178	0.701	0.523	0.0156114	F07C3.3.1	j	V:9226088-9232594	-	1	9228149	9228150	1	GCAGGAT
TCONS_00002488	XLOC_000911	asic-2	0.197	0.715	0.518	0.0268573	T28F4.2.1	=	I:7422586-7723116	+	1	7482786	7482792	6	AAGTTTCAGATG
TCONS_00080972	XLOC_036955	pgp-4	0.194	0.71	0.516	0.0603919	F42E11.1a.1	=	X:11160980-11392852	+	1	11359147	11359153	6	CATTTTTAGGAG
TCONS_00087437	XLOC_039676:rme-4	rme-4	0.25	0.766	0.516	0.0167778	F46F6.1a.2	=	X:10373234-10406303	-	1	10374737	10374743	6	TAGTTCCAGAAA
TCONS_00028078	XLOC_010645	R06B10.2	0.09	0.595	0.505	0.000479483	R06B10.2.1	j	III:973102-988446	-	1	973905	973906	1	GCAGGAA
TCONS_00015855	XLOC_006122	bath-45	0.411	0.905	0.494	0.000180842	F29C12.5.1	j	II:13122212-13125161	+	1	13122940	13123026	86	TGATTTCAGAGCTGCATTGAATGAAATTCTCTGAATTTTGTCAAATTGTTGCTTATTTTCTTCTCAACTTCAAATGTTTTAAATTTCAGAAA
TCONS_00072984	XLOC_033430	nphp-4	0	0.493	0.493	0.0733763	R13H4.1.1	=	V:11829581-11843733	-	1	11842802	11842844	42	TAGATGGAAGAACATTCGAAAACCCGAAAAGTACAAAAATTACAGCGC
TCONS_00085642	XLOC_038943	tag-275	0.051	0.542	0.492	0.0020208	C34H3.1.1	j	X:6142459-6153420	-	3	6143992;6144541;6150543	6143993;6144542;6150549	1;1;6	TCAGATG;TCAGGTC;TGTTTTCAGATT
TCONS_00009486	XLOC_003617:clp-3	clp-3	0.004	0.48	0.476	0.00083164	Y47H10A.1.1	j	I:12069698-12087964	-	1	12083658	12083659	1	CCAGAGT
TCONS_00064475	XLOC_029422	F53B7.7	0	0.475	0.475	0.00446482	F53B7.7.1	j	V:10998887-10999642	+	1	10999102	10999104	2	TTCAGACA
TCONS_00081427	XLOC_037165	adt-1	0.084	0.545	0.461	0.0988968	C02B4.1.1	j	X:12670678-12691459	+	1	12681498	12681507	9	CAGCTATTCCAGCCC
TCONS_00063329	XLOC_028887	F20D6.5	0.016	0.473	0.457	1.46881e-08	F20D6.5.1	j	V:8161943-8183442	+	1	8163549	8163553	4	CAGCAATCGA
TCONS_00073310	XLOC_033580	pals-37	0.189	0.646	0.457	0.0830136	C54D10.14a.1	j	V:12437466-12441520	-	2	12438325;12441285	12438326;12441292	1;7	TCAGGGA;GTAGTTTCAGATT
TCONS_00089339	XLOC_040457	snt-7	0.216	0.669	0.453	0.0946735	T10B10.5.1	j	X:15195526-15205331	-	3	15196705;15198803;15199140	15196706;15198805;15199146	1;2;6	TCAGATG;TTTAGCAA;AATTTTCAGGGT
TCONS_00028626	XLOC_010822	pho-9	0.108	0.557	0.449	0.000248797	Y71H2AM.16.1	j	III:2757086-2760816	-	1	2759441	2759442	1	CCAGACA
TCONS_00029667	XLOC_011172	pqn-25	0.355	0.798	0.443	1.14465e-06	D1044.3.1	=	III:5506757-5512602	-	3	5509795;5510893;5511699	5509797;5510894;5511701	2;1;2	TTAAGGTG;CCAGCCG;TCCAGAAT
TCONS_00082088	XLOC_037477	jmjd-3.2	0	0.434	0.434	6.37178e-11	F23D12.5.1	j	X:14447671-14453885	+	1	14448774	14448905	131	TAGGGGTCGCAACATGCGGCATTTCTTTAAATTTCCTCAAAAGCTAGTAGATTCTCCAATTGTCAGCACAAATGATTCTGAACCAATTAATGAACAAGTTTATTCAACACAAAGTAATCATGGCGAGCTTCAAGATA
TCONS_00022656	XLOC_008766	npr-30	0.567	1	0.433	8.80652e-05	H10E21.2.2	j	III:1253-11940	+	1	11675	11702	27	TAGCTACGCCCACTAAAATCTTATTTCCAGATG
TCONS_00028317	XLOC_010722	Y22D7AL.11	0.567	1	0.433	0.0110729	Y22D7AL.11.1	j	III:1626631-1637561	-	1	1631682	1631683	1	TCAGGTG
TCONS_00058079	XLOC_026081:Y105C5B.11	Y105C5B.11	0.437	0.867	0.43	0.0536967	Y105C5B.11b.1	j	IV:15936921-15947439	-	1	15940874	15940875	1	TCAGCTA
TCONS_00090121	XLOC_040776	F10D7.5	0.229	0.649	0.42	0.0701733	F10D7.5a.1	j	X:17383124-17392292	-	4	17385416;17386088;17388659;17389001	17385417;17386089;17388660;17389002	1;1;1;1	TCAGGAA;TCAGATG;TCAGACC;TAAGATG
TCONS_00026090	XLOC_010014:K04H4.5	K04H4.5	0.011	0.43	0.419	0.0228599	K04H4.5.1	j	III:9347713-9365439	+	1	9360269	9360301	32	TTTATTCCCGATTTTACTTTGCCATTTCGTTACAGCGG
TCONS_00031711	XLOC_011969	Y45F3A.4	0.126	0.545	0.419	0.00821819	Y45F3A.4.1	j	III:10572474-10583755	-	3	10573363;10573983;10575420	10573364;10573989;10575426	1;6;6	CCAGAAC;TTATTTCAGCAT;TCATTTCAGCTT
TCONS_00073931	XLOC_033823:swan-1	swan-1	0.142	0.559	0.417	0.0282409	F53C11.8.2	=	V:13796640-13807448	-	1	13805881	13805882	1	CCAGGAG
TCONS_00074867	XLOC_034250	nhr-213	0.105	0.517	0.412	0.025639	T06C12.13a.1	=	V:15894394-15897515	-	3	15895432;15895582;15896302	15895434;15895583;15896303	2;1;1	TTCAGAAA;TCAGTAC;TCAGATA
TCONS_00069327	XLOC_031747:srab-11	srab-11	0.057	0.466	0.409	0.000475788	C36C5.8.1	j	V:3143093-3150173	-	3	3147053;3149173;3149386	3147056;3149263;3149387	3;90;1	TTACAGGTT;TAGACACACGATCATCTTTCCGGTGTACAGTAGTGGCAATAGTTGCCCAAGCACTATAGAACACCTTTCTAACCGTCCATTTCCAAATTTCAGGTT;TCAGTAA
TCONS_00087876	XLOC_039832:F46C3.2	F46C3.2	0.374	0.782	0.408	0.0554111	F46C3.2.1	j	X:11416647-11420076	-	2	11418208;11418760	11418209;11418779	1;19	GCAGCAT;TTTGACTTTTGTTCTTTTGCAGAAT
TCONS_00012029	XLOC_004534	lgc-45	0.059	0.466	0.407	0.000194042	W10G11.16a.1	=	II:3554821-3567490	+	1	3564625	3564661	36	TAGATAGTGCTTCTCCCAAGCTCAACCGACAGTTCTAAGGAA
TCONS_00008157	XLOC_003119:F53B6.4	F53B6.4	0.033	0.437	0.404	0.00630386	F53B6.4a.1	j	I:8779730-8971031	-	2	8948632;8948978	8948746;8949024	114;46	GAGATGATTTTCTTGAAGATAAGAGTAAACGTGAAGAAATGAGGATAAGGTCGAGGGGTCAACCTTTTAGAAAAAGCAAATGTGATCAATCAATCGATAATAAAAATCAGTTCGAAGTTT;TGAGCAAGTTCTGTCAAGAATTTTTCTCCCGCATTTGGTTTTTCTTCAGAAC
TCONS_00027892	XLOC_010602:best-17	best-17	0.048	0.45	0.403	2.95686e-06	T19C3.1.1	j	III:599508-610154	-	2	607044;607377	607046;607378	2;1	TTTAGGGT;TCAGAAC
TCONS_00061061	XLOC_027840:cdc-25.2	cdc-25.2	0.106	0.506	0.4	0.00577847	F16B4.8d	j	V:1567072-1586080	+	1	1582419	1582771	352	ATCAATTTTTTCAACAGCTATAAATTTTAAAACCAAGTTTAACGAACTGTTTTCACCAAAAATTTTTCCTAGAAGGTGTATTTATCTTTCTAATATCAGTCATTCTGCTATCAAATCACCGAAATTTCTGATTTCTGACATTTTCTGCCATTTCCCGTGTTTCGAGACAAAAAACGACCTGAGTAGACCCAAATCTCACCAAGATAGACGTGTCTATTTCTAAATTTTGACCCTCTCTCCCCAGGTGAAAAGTTTCTTTTGGGATGTATTGGGTGGGACCTGAACCGCCTATTCTCAGACCACCAGGCCATCCGTCGTTGCCATTCGTACTCCTTGTGCATTCCAACATTTGCAGAAA
TCONS_00008141	XLOC_003111	unc-29	0.516	0.91	0.394	0.000167824	T08G11.5.2	=	I:8779730-8971031	-	1	8897823	8897824	1	TCAGGAA
TCONS_00068740	XLOC_031460:Y75B7AL.2	Y75B7AL.2	0.277	0.665	0.388	0.0148167	Y75B7AL.2a.1	j	V:1332274-1371013	-	1	1357821	1357822	1	TCAGGAG
TCONS_00047859	XLOC_020509	F15E6.9	0.001	0.381	0.381	0.000567571	F15E6.9b.1	=	IV:4292868-4299083	-	1	4296026	4296027	1	TCAGGAC
TCONS_00077776	XLOC_035509:F11D5.7	F11D5.7	0.062	0.434	0.372	0.0814845	F11D5.7.1	j	X:3282601-3307095	+	1	3300933	3300938	5	CAGGCAATGTT
TCONS_00075014	XLOC_034318	fbxa-88	0.06	0.428	0.368	0.0769994	F10A3.2.1	j	V:16142007-16144743	-	1	16143150	16143182	32	ATTCTTATCCACTCAGTGTTTCATTTTTGTTCCAGATT
TCONS_00030538	XLOC_011500	cdh-3	0.307	0.673	0.366	0.0127574	ZK112.7.1	j	III:7741247-7757487	-	2	7751911;7754463	7751912;7754465	1;2	TCAGATT;TCCAGATC
TCONS_00052069	XLOC_022682:R102.4	R102.4	0.331	0.695	0.365	0.00275451	R102.4a.2	j	IV:10691990-10697491	-	1	10695574	10695581	7	CAGCTTGCAGGAC
TCONS_00050435	XLOC_022025	deb-1	0.124	0.48	0.357	0.000279637	ZC477.9c.1	=	IV:7085215-7094370	-	1	7092524	7092526	2	TTTAGGTC
TCONS_00072791	XLOC_033336:des-2	des-2	0.516	0.871	0.355	0.00189385	T26H10.1a.1	=	V:11415341-11424532	-	1	11419763	11419764	1	TCAGAGA
TCONS_00053115	XLOC_023089	K10D11.3	0	0.35	0.35	4.77462e-05	K10D11.3b.1	j	IV:12982118-12986099	-	2	12982803;12985792	12982804;12985948	1;156	TCAGCTC;CAGTATGCCCCACCCAAGACACCCAATTTCCAACTAAAAATAATAATTCTTCAACTGATCAATACAATCCCTATTACTATCCATATCCTTGGTGGCCAAATTCCTATATTCCACGTTACAAGTCAAATCAGTTTTGTAAATGGACTGTCGTAATTCCAGACC
TCONS_00009101	XLOC_003467	mltn-2	0.1	0.446	0.346	0.00722878	Y52B11A.7.1	j	I:11018479-11025845	-	1	11019968	11019983	15	GAAAATATTAATTTCCAGGTG
TCONS_00083491	XLOC_038059	F57C12.6	0.269	0.614	0.345	0.0359744	F57C12.6.1	j	X:553052-563695	-	2	553788;555150	553794;555155	6;5	CAGAGTCAGATT;TAGAATGAGCT
TCONS_00008811	XLOC_003348:csnk-1	csnk-1	0.321	0.666	0.345	0.038394	Y106G6E.6.1	j	I:10227158-10237893	-	2	10229786;10230425	10229787;10230440	1;15	TCAGATC;CAGAACAACCGGTTACAGAGG
TCONS_00041645	XLOC_016867:Y57G11C.42	Y57G11C.42	0	0.344	0.344	0.0011929	Y57G11C.42e	j	IV:14728533-14745734	+	1	14734344	14734348	4	ATTTCAGATA
TCONS_00027704	XLOC_010544:toca-2	toca-2	0.368	0.707	0.339	0.0852437	K08E3.3a.1	j	III:13752405-13759434	+	1	13759285	13759291	6	AAGTTGCAGGAA
TCONS_00075129	XLOC_034390	srr-3	0.638	0.977	0.339	0.00100804	F36D3.3.1	=	V:16506896-16508792	-	2	16507663;16507995	16507665;16507996	2;1	TTCAGAAC;TCAGTAA
TCONS_00028985	XLOC_010931:C36A4.14	C36A4.14	0.431	0.769	0.338	0.0838713	C36A4.14b	=	III:3821560-3832272	-	1	3830928	3830929	1	TCAGATA
TCONS_00047011	XLOC_020211	snn-1	0.066	0.403	0.337	0.092405	Y38C1BA.2a.1	=	IV:1805036-1815107	-	2	1806501;1806795	1806502;1806797	1;2	CCAGGTG;TCCAGCAC
TCONS_00083387	XLOC_038031	C04E7.3	0	0.336	0.336	8.96927e-12	C04E7.3.1	j	X:334800-349539	-	1	337532	337681	149	AAGGGAGATACTGTGAACAATCTCAATACTTGTATGCTCCAGCCGCACCCGTCCCCTACCGCAAAAAGGCATGAAAATCCGAGGTCACCGGTTTTTAAAGTTCCAAGAAAATTTGTTTCAAAACGCGAAAATATTCAAGCACTAATATTGAGAAA
TCONS_00083608	XLOC_038097	igcm-1	0	0.331	0.331	2.11593e-06	F39H12.4.1	j	X:845730-851614	-	3	847131;847491;849766	847132;847493;849767	1;2;1	TCAGCCA;CGCAGATC;TCAGTTT
TCONS_00007615	XLOC_002916	sol-1	0.029	0.356	0.327	0.0131909	C15A11.3.1	=	I:7384397-7395920	-	2	7390296;7395622	7390297;7395623	1;1	TCAGTTG;TCAGGCA
TCONS_00004916	XLOC_001954	F49B2.6	0	0.325	0.325	0.00135629	F49B2.6.1	j	I:14330963-14339838	+	1	14332834	14332840	6	CAGTGCACCAAC
TCONS_00071358	XLOC_032692	F52E1.9	0.384	0.707	0.323	0.00456873	F52E1.9b.1	=	V:8397644-8402669	-	2	8399063;8399348	8399064;8399373	1;25	TCAGGTC;TACATATCAATCCTTTCGTTTTTTGTAGATA
TCONS_00068375	XLOC_031297	daam-1	0	0.32	0.32	7.39471e-05	F56E10.2a.1	=	V:64563-83831	-	2	70871;83513	70873;83514	2;1	TTCAGATA;CCAGTGA
TCONS_00017114	XLOC_006576	Y51H7C.9	0	0.32	0.32	0.0110714	Y51H7C.9.1	j	II:1409123-1420150	-	1	1409413	1409414	1	TAAAGGA
TCONS_00038593	XLOC_015145:magi-1	magi-1	0.523	0.839	0.316	0.000518581	K01A6.2a.1	j	IV:11712397-11729276	+	2	11715039;11722518	11715041;11722520	2;2	TGCAGAGA;TTCAGGTC
TCONS_00003125	XLOC_001178	uggt-2	0	0.315	0.315	0.0016552	F26H9.8.1	j	I:9310318-9327339	+	1	9323726	9323748	22	CAGAAGATCTATTCAATTTTTAAAGAAT
TCONS_00003202	XLOC_001217	usp-48	0.297	0.611	0.313	0.019338	F30A10.10.1	j	I:9506392-9512236	+	1	9509463	9509469	6	TAGTTTCAGCAA
TCONS_00077800	XLOC_035518:F11D5.1	F11D5.1	0.021	0.33	0.309	0.0010006	F11D5.1a.1	=	X:3332418-3347302	+	1	3334112	3334114	2	TTCAGCAG
TCONS_00075970	XLOC_034793	ptr-22	0	0.306	0.306	0.0274676	Y80D3A.7a.1	=	V:18919256-18934830	-	4	18919606;18921321;18922453;18928089	18919608;18921322;18922454;18928104	2;1;1;15	TTCAGACA;TCAGACC;TCAGAAA;TCAGTATTATAATTACAGATA
TCONS_00078577	XLOC_035910:bus-8	bus-8	0.006	0.308	0.302	0.0148313	T23F2.1.2	j	X:5489726-5496000	+	1	5490506	5491596	1090	TAGATTGCATACAACTGCTGAAAAATCAAACTCCGCAGAAAGGAAATAACGAGTCCGGCTAGTTGCATCGGAATGTGTGATTCGTAACGGACACGCTTTTTCCCGGTTTTTTCGGTTTCATGTATACGCCTAGTTTTTTGAAGCAAGTTGTCAGATATGTATTGCACTTTTTTAAGTATAGAAATTTCCAAACAGTCTGATTTGGGTTAATTGAGCAGTTTCGGACGAAAATACTTTAAGAAGACCATTAAAAAAAAACTGAATTTAACTGCTCTAACGCAATAATGTTTGTTTCAGATGCAATATTCACATTTTTGCAGTTTTCAAATATTTGTAAAAATTTCTTTAAGATACCTTATCATTTCTAGGTAAAACGACAGAATCTGAAGAAAAAACCTT…
TCONS_00009846	XLOC_003775:M01E5.2	M01E5.2	0.283	0.584	0.301	1.01164e-05	M01E5.2.2	j	I:13276955-13286989	-	3	13278501;13278875;13282401	13278502;13278877;13282407	1;2;6	TCAGCTA;TTTAGATG;AAGTTTCAGATC
TCONS_00034962	XLOC_013366	B0273.1	0.033	0.333	0.3	0.0224323	B0273.1a.1	j	IV:5490478-5495372	+	1	5494231	5494240	9	CAGGCAATGACTCTT
TCONS_00077550	XLOC_035404	T03G6.1	0.024	0.324	0.3	0.0125733	T03G6.1.1	j	X:2607805-2609989	+	1	2608820	2608822	2	TTCAGATC
TCONS_00025419	XLOC_009744	fbn-1	0.06	0.356	0.295	4.1562e-08	ZK783.1e.1	=	III:7625375-7645837	+	1	7629293	7629299	6	CAGGTCTAGAAA
TCONS_00037309	XLOC_014617	alp-1	0.058	0.352	0.294	9.21074e-11	T11B7.4d.1	=	IV:8852494-8867765	+	1	8860357	8860546	189	TAGTGAGATCATGGTGGTGAGATGATGACAACAACGAGAATTGAAGTTGAAAAGAAGTATCTGTAGGAGATAATTATTCATTTATTTATGTTTATCATCCGGTGTATTTCAGTAGTATTCTAGTCAAATAAAATTGTTCAATGAGCACGCACTCACCATAATTCCATCATATTCTAACAACATTCTATCTAGGTT
TCONS_00065015	XLOC_029697:nhr-209	nhr-209	0.497	0.788	0.291	0.00446482	R07B7.16.1	j	V:12098130-12103388	+	1	12099083	12099121	38	CAGAATTGATTCTATGTGACATACAACTCTACCATTTTCAGATG
TCONS_00021986	XLOC_008496	F42G4.7	0.001	0.291	0.29	0.00960547	F42G4.7.1	j	II:13043926-13050827	-	1	13047285	13047287	2	TTTAGGTT
TCONS_00029451	XLOC_011099	set-2	0.092	0.38	0.288	0.000296798	C26E6.9b.1	=	III:4847008-4947317	-	1	4925737	4925746	9	AAGCCTTCTCAGACT
TCONS_00085256	XLOC_038776	ags-3	0.006	0.292	0.286	0.000853199	F32A6.4a.1	=	X:5289727-5306328	-	1	5290670	5290671	1	TCAGATG
TCONS_00046922	XLOC_020181	clp-6	0.265	0.547	0.281	0.00155122	Y77E11A.10.1	j	IV:1430508-1435205	-	2	1431856;1432533	1431857;1432541	1;8	TCAGGTA;AAGTTTTTCAGGAA
TCONS_00079489	XLOC_036328	C44E12.1	0.007	0.287	0.28	0.0197516	C44E12.1.1	j	X:7595860-7599824	+	1	7596926	7596927	1	GCAGCAT
TCONS_00080589	XLOC_036805	acr-8	0.622	0.902	0.28	0.0561664	ZC504.2.1	j	X:10412694-10428656	+	1	10412923	10412929	6	AAGATTCAGCTG
TCONS_00084650	XLOC_038524	sax-1	0.641	0.912	0.27	0.0115091	R11G1.4a.1	j	X:3646319-3650527	-	1	3646702	3646708	6	AAGTTTCAGCAA
TCONS_00064386	XLOC_029388:nrx-1	nrx-1	0.253	0.522	0.269	0.0985668	C29A12.4k.1	j	V:10812062-10846695	+	2	10825012;10841936	10825013;10842434	1;498	TCAGATG;TCCTCTATCCAATTAGATCTCTTCTGAAAGTTTCCAATTTCTTTTGTAATATGATATCTTTCTTTCCTTTCCTGATCACCTTAAATCTTAAATATTCAAAGGCTCCACCTCCCTCTTCCGATGGTATTCCTTGAGCATTTGCGTGGTGGTACGCCACGTGGCACGACTACAGTATCCCCAATATTGTGTCTAATGAATTGGAACGACGAGCAATGTCGCCAACAATTAAAAAGTTATATTCCAAAGTTTGCATCGAATTTTGATGCTCCTCGACATGTTCCTCAGCCGCCCTCATCTCCATCCTATGATTATGAAGGAGATGAGGACGAGGAAAAAAAGGAAGAAAAGGATCACGGAATCGCTGATCGAAGCATGAATGATGTGTCCGGAG…
TCONS_00080948	XLOC_036944	ifa-1	0.381	0.643	0.261	0.0926873	F38B2.1a.1	=	X:11160980-11392852	+	1	11273081	11273270	189	TTGACGCCCACCTAGTTTGCGCACCGTTGAGACTCCGCTTTTGTCTCTACAGTCAGCCTCCGACTAATTCCTTGGTCACACATTACGGCAGTCAGGGGTTGCCATACAACTCACAACCTCATTTTGAAATTTCGAAGCTGCCGAGTACAGTCGGCCCTTTTCACTTTCACAATAGAAATTTACGATTTGCAGCGA
TCONS_00020688	XLOC_007999	glt-5	0.653	0.914	0.261	0.0927368	Y53C12A.2.1	=	II:9706482-9708890	-	2	9707415;9707667	9707417;9707668	2;1	TTCAGGAT;CCAGGCA
TCONS_00010806	XLOC_004039	slc-36.2	0	0.259	0.259	1.14465e-06	T27A1.5a.1	j	II:522593-530374	+	1	523470	523478	8	CAGAAAACGAGAGC
TCONS_00009379	XLOC_003585:vab-10	vab-10	0.049	0.306	0.257	0.0368134	ZK1151.1k.1	=	I:11707817-11923919	-	1	11759683	11759684	1	TCAGGTT
TCONS_00011930	XLOC_004499:bath-29	bath-29	0.494	0.75	0.256	0.0280629	F14D2.4a.1	o	II:3346609-3365961	+	1	3358633	3358640	7	CAGATAATACTGT
TCONS_00082696	XLOC_037775	C30F2.5	0.646	0.899	0.254	3.88215e-06	C30F2.5.1	j	X:16088088-16096974	+	1	16094668	16094676	8	CAGTTTTTCAGATG
TCONS_00080343	XLOC_036690	F15G9.1	0.111	0.365	0.254	0.0400918	F15G9.1a.1	j	X:9702239-9708563	+	1	9707328	9707362	34	GAATATACTCTTATTTAATAGCATATTTTTCATTCAGAAG
TCONS_00029189	XLOC_010990	sup-26	0.034	0.285	0.252	0.0292149	R10E4.2a.1	=	III:4276265-4280217	-	1	4279259	4279334	75	CTCATCAAACCAACAGTTTAATCGTCCTCCTCCTCCACCTCATAATTCTCAACATCATCATCATCATAATAATTCAAGAAT
TCONS_00053135	XLOC_023099	C39E9.7	0.001	0.251	0.25	0.061183	C39E9.7.1	j	IV:13072612-13082781	-	2	13074729;13075245	13074731;13075246	2;1	TCCAGGTT;TCAGTCT
TCONS_00023858	XLOC_009191	nit-1	0.001	0.25	0.249	3.38522e-06	ZK1058.6.1	j	III:3922206-3926238	+	1	3922443	3922450	7	TTCAGATTCAAAA
TCONS_00063883	XLOC_029161	dop-2	0.031	0.277	0.247	0.000801168	K09G1.4c.1	j	V:9600499-9614942	+	1	9611964	9611966	2	TCCAGTGG
TCONS_00089669	XLOC_040619	F23A7.6	0.074	0.315	0.241	0.0554111	F23A7.6	j	X:16228743-16244235	-	2	16238503;16238772	16238507;16238773	4;1	CAGCCAGTTG;CCAGGCT
TCONS_00082491	XLOC_037683	eat-20	0	0.239	0.239	7.5206e-06	H30A04.1a.1	j	X:15506036-15524020	+	1	15522926	15522932	6	CAGTTCCAGAAT
TCONS_00039916	XLOC_015779:lin-66	lin-66	0.004	0.24	0.236	0.0709293	B0513.1a.1	j	IV:13887922-13894016	+	1	13890672	13890681	9	CAGGAGTTTCAGCCT
TCONS_00015076	XLOC_005783	ptr-8	0.752	0.988	0.236	0.0412232	F44F4.4.1	j	II:10888930-10895088	+	1	10889273	10889279	6	CATTTTCAGCCA
TCONS_00072883	XLOC_033384	sipa-1	0.035	0.271	0.236	4.18936e-05	T27F2.2f.1	j	V:11631433-11637291	-	1	11632664	11632667	3	CAGCAGGTA
TCONS_00075912	XLOC_034777:Y17D7B.7	Y17D7B.7	0	0.236	0.236	0.00166893	Y17D7B.7	j	V:18780489-18786857	-	3	18781055;18781726;18781805	18781056;18781727;18781806	1;1;1	TTAGCGA;TCAGATA;CCAGAAT
TCONS_00023612	XLOC_009094	Y53G8B.1	0	0.235	0.235	0.00101265	Y53G8B.1.1	j	III:3112427-3131399	+	1	3129277	3129342	65	ATCATTCATTATCATTCATCACTATCACTTTTCTCCAAAATTGTCACAAACACATTGACTTTCTTTAGAAA
TCONS_00031752	XLOC_011984:Y39A1A.21	Y39A1A.21	0.28	0.515	0.234	0.0212635	Y39A1A.21a.1	j	III:10700651-10707173	-	1	10707022	10707024	2	TTCAGGTA
TCONS_00028212	XLOC_010683:fbxa-5	fbxa-5	0.003	0.237	0.234	0.00574698	Y82E9BL.8.1	j	III:1331944-1344737	-	1	1340305	1340333	28	AAAATGTCCGACCAACAGGCTGATCTGACAGAAA
TCONS_00038025	XLOC_014899	mask-1	0.06	0.293	0.233	0.0764575	R11A8.7a.1	=	IV:10374904-10387318	+	2	10378657;10381653	10378669;10381659	12;6	TAGACGAGATTACAGGGA;CAGTTTCAGTGA
TCONS_00006550	XLOC_002511:M04F3.3	M04F3.3	0.006	0.239	0.233	0.00275451	M04F3.3.1	j	I:4735470-4769229	-	1	4765165	4765313	148	ATGAAAAAAAAAAAGAATTTCACGTGCTCTAATTTTTAAAATCAATTTTTTAATTTTTGTTCGAAAAGGGCAATTCAAAAATCTCGTGTTTTTCTCTACTCGAAAATCGTCATTTCTGAAGTTTAGTTCATAATTTTGAAATTCCAAGCAGTTA
TCONS_00076555	XLOC_034985	B0250.4	0	0.232	0.232	0.00165537	B0250.4	j	V:20457915-20468235	-	1	20464492	20464706	214	CTAATTCAGTTCAAGAAAAATTATTTAAAGGAGGACTAACGGTTCGGACGATTTTGTATTGACCCAAAATGGGCTCAAATGAACGAATTTCACAATAAAACTTTTCAAAATTTTTTACGTCAGTTCTAGGGAACTTTTCTACTTTTTGACTTGTACATAATAGTAAAATATAATAGACAACAATAATATTATTATTATTAGCGAATTTTTTTTTCAGCGT
TCONS_00046549	XLOC_020057:R02D3.7	R02D3.7	0.301	0.533	0.231	0.00662438	R02D3.7.1	j	IV:253570-257241	-	1	254095	254096	1	GCAGAAA
TCONS_00067851	XLOC_031072:nceh-1	nceh-1	0.01	0.239	0.229	6.97446e-06	Y43F8A.3a.1	j	V:19371434-19381031	+	1	19377444	19377446	2	TTCAGCGC
TCONS_00020732	XLOC_008009:cyp-13A1	cyp-13A1	0	0.225	0.225	0.073616	T10B9.8.1	=	II:9770758-9782495	-	1	9781217	9781218	1	TCAGAAA
TCONS_00071810	XLOC_032897	rgef-1	0.035	0.258	0.223	0.0599589	F25B3.3a.1	=	V:9556064-9561991	-	1	9560007	9560008	1	TCAGACT
TCONS_00064742	XLOC_029571	ccch-1	0	0.221	0.221	8.56299e-05	F38B7.1a.1	j	V:11527830-11541219	+	1	11536056	11536064	8	CAGAGTCTCTGCAG
TCONS_00069457	XLOC_031811	ugt-64	0.226	0.447	0.221	0.0117437	C07G3.9a.2	=	V:3503129-3506352	-	1	3505358	3505361	3	TTTCAGATC
TCONS_00031160	XLOC_011757	T23G5.2	0.538	0.759	0.221	0.00084001	T23G5.2a.2	j	III:9231414-9238053	-	1	9236322	9236328	6	TTTTTTCAGTAG
TCONS_00002445	XLOC_000900	kbrl-1	0.498	0.718	0.22	0.0540347	F52A8.6a.1	=	I:7339203-7352235	+	1	7348059	7348061	2	TTCAGAGA
TCONS_00034017	XLOC_012826	ama-1	0.092	0.309	0.217	0.0117437	F36A4.7.2	j	IV:4247551-4258173	+	1	4248020	4248070	50	ATTTCTCTCAATTTCTTCCTGATTTTTTCGAAAATTCAATTTACCGTTTTCAGATC
TCONS_00003521	XLOC_001362:aph-2	aph-2	0.354	0.572	0.217	0.0337719	ZC434.6a.1	=	I:10336388-10345648	+	1	10344564	10344570	6	CAGTTTCAGATG
TCONS_00017197	XLOC_006615:fbxa-165	fbxa-165	0	0.217	0.217	0.085525	C08E3.8.1	j	II:1614734-1622851	-	1	1619035	1619148	113	TAGTTAACTTATCAGTGTCGAAATTAATTTTTATGATGCAAACAATCCGAAACATTTAATGTTTTATGTAGCTGTGGGCACACATTGCCATTTCATTTCAATTTTTTTGCTTCCAGAAA
TCONS_00053148	XLOC_023104	dli-1	0.292	0.509	0.217	0.0119115	C39E9.14b.2	=	IV:13093941-13098836	-	1	13097823	13097829	6	AAGTTTTAGGAA
TCONS_00070085	XLOC_032084	Y47A7.2	0.772	0.989	0.217	0.00201939	Y47A7.2.1	j	V:5163268-5213468	-	1	5197588	5197589	1	TCAGACC
TCONS_00064882	XLOC_029633	D2023.1	0.017	0.231	0.215	0.0768698	D2023.1d	j	V:11789549-11800640	+	1	11799796	11799846	50	ATTGAATCTCTCTATTCATTTACCAATTTATAACTTAAATTAATATTTTTCAGAAA
TCONS_00010798	XLOC_004037	W07E6.3	0.03	0.245	0.215	0.070332	W07E6.3b.1	j	II:491097-521605	+	1	496711	496712	1	CTAGGGC
TCONS_00086585	XLOC_039306:dim-1	dim-1	0.067	0.281	0.214	0.092023	C18A11.7a.1	=	X:8050475-8065688	-	1	8057884	8057885	1	TCAGGCT
TCONS_00038663	XLOC_015176	trpa-1	0.01	0.218	0.208	1.17356e-06	C29E6.2a.1	j	IV:11863880-11875738	+	1	11865069	11865072	3	CAGAAGATG
TCONS_00075858	XLOC_034748	ubc-19	0.223	0.428	0.205	0.0966899	Y69H2.6.2	j	V:18685059-18689874	-	1	18687773	18687774	1	TCAGAGA
TCONS_00084861	XLOC_038616:hpk-1	hpk-1	0.17	0.374	0.204	0.0340649	F20B6.8a.1	=	X:4204601-4217419	-	1	4214561	4214563	2	TGCAGAAA
TCONS_00070529	XLOC_032292:gfi-1	gfi-1	0.126	0.33	0.204	0.00106562	F57F4.3.1	j	V:6392540-6408783	-	1	6393696	6398944	5248	CAGCAATATCCTCTGCTACGTCGGATTCTATGCCAACAACACTACTCCAGGATTCGGATCAGGGGACACCGTCACTTGCTCCGCAGGAAATGTATGTACCAGTGTTTCTGGAGTCTACAACGGATACGACGCTGCTGCCTACGCTTGCATGCCACAAGGACTTTGCGACGGCATCTTCCCAAATATTGACCCAAATAATCCAATCGCCTGCACCAATCTCGCTGGAACCAACATTCAAGGATGCTGCTGTTACAAGCAAGATTGTACTAGCCTCGCTCCAATGAACAACCCACCAACTCCATCTCCATGGAACAAGAACAACCAGACATGCTATCAAGGAATTTCCGTCAACGGAGCTCTCTTGTATGGAGGATCCTTCTCTCAATGCTTGGGAGAATG…
TCONS_00010684	XLOC_004000:chs-2	chs-2	0	0.203	0.203	0.0289588	F48A11.1b.1	=	II:162198-211941	+	1	210668	210669	1	TCAGGAC
TCONS_00031766	XLOC_011989	K01G5.8	0.247	0.45	0.203	0.0239107	K01G5.8a.1	=	III:10740279-10740772	-	1	10740597	10740606	9	CAGAGATTCCAGAAA
TCONS_00025978	XLOC_009966	cls-2	0.213	0.414	0.201	0.0130631	R107.6a.2	=	III:9055051-9058882	+	1	9058264	9058273	9	CAGTATTTGCAGGAG
TCONS_00013249	XLOC_005022	lin-23	0.512	0.71	0.198	0.00302551	K10B2.1a.1	=	II:6369916-6374544	+	1	6373805	6373811	6	AAGTTTCAGCAA
TCONS_00032045	XLOC_012104:faah-5	faah-5	0.055	0.251	0.197	0.0215824	Y56A3A.5.1	=	III:11885955-11893022	-	2	11889189;11890342	11889190;11890343	1;1	TCAGATG;TAAGAGG
TCONS_00004477	XLOC_001785:gale-1	gale-1	0.668	0.864	0.196	0.0101874	C47B2.6a.1	=	I:12964673-12982452	+	1	12975400	12975406	6	CAGTTACAGATG
TCONS_00077873	XLOC_035553:rgs-7	rgs-7	0.074	0.269	0.195	0.000364361	F56B6.2a.1	j	X:3536402-3557599	+	4	3542539;3546491;3547821;3556431	3542550;3546497;3547830;3556440	11;6;9;9	ATAGTTTCACTCAGATG;TAGTTGCAGGAA;AAGATGCTTCAGGTT;AAGTTTTTTCAGCGG
TCONS_00006921	XLOC_002630	tns-1	0.176	0.362	0.186	0.00815131	M01E11.7f.1	=	I:5579664-5607529	-	1	5587928	5587929	1	TCAGACA
TCONS_00087756	XLOC_039796	C05C9.3	0	0.184	0.184	0.0188107	C05C9.3.1	j	X:11142726-11157643	-	4	11145671;11146064;11146198;11146995	11145673;11146065;11146199;11146996	2;1;1;1	TGCAGTCA;ACAGAGA;CTAGGTT;TTAGACG
TCONS_00009728	XLOC_003733	Y18D10A.9	0.714	0.899	0.184	0.00894403	Y18D10A.9.1	j	I:12844268-12865568	-	1	12858270	12858272	2	TTCAGACC
TCONS_00086887	XLOC_039444	M02D8.5	0.004	0.185	0.181	0.000173381	M02D8.5.1	j	X:8754568-8761616	-	3	8754777;8756426;8756717	8754778;8756427;8756726	1;1;9	TCAGCTG;TCAGGAA;AAGTAATTCAAGTGA
TCONS_00089242	XLOC_040420:C18B12.6	C18B12.6	0	0.179	0.179	0.067697	C18B12.6.1	j	X:15002033-15007308	-	1	15002500	15002501	1	TTAGTGA
TCONS_00039307	XLOC_015428:Y67H2A.7	Y67H2A.7	0.79	0.966	0.177	0.000437303	Y67H2A.7a.1	j	IV:13300827-13310818	+	1	13307113	13307338	225	TTTTGACTGACTGAAATTCTAAAAAATCTCAAAATTATTGGAGTTTTTTATTATTATATTTTTTGCGCGCCGAGGTGTGTCGTTTTTTGTTTTTTCAATGTTTTTTTTAGGGAAAATCAAAAAATCGAGAAAATATATTTTTTTTGAAAAAATCGAAAAACCGACACCCTTGGCCGAAAGTTTTTCAAAAATCTAGTGAAATTACGAGACTTTTCCTTGAAATTTCAGATT
TCONS_00024235	XLOC_009333	tag-325	0.484	0.658	0.174	0.0703293	C38D4.5b.1	=	III:4796838-4802907	+	1	4797569	4797575	6	AAGCTTCAGCCG
TCONS_00020348	XLOC_007854:sftd-3	sftd-3	0.031	0.204	0.173	0.068159	C18E9.10d.1	=	II:8951923-8997662	-	1	8963981	8963987	6	AAGTTTCAGAGG
TCONS_00035446	XLOC_013653	sams-3	0.72	0.892	0.172	0.0383971	C06E7.1a.1	=	IV:5848169-5859976	+	1	5849225	5849318	93	CAGGCTCTACGGGTGTTGGATGATGCGGGAAACGGGGCTGAAGCTTATCGCAACAATATGTTTCTTTACCTGTTACAACGGTTACTTTGATTACAGAAA
TCONS_00034184	XLOC_012884	F28E10.1	0	0.171	0.171	6.98528e-05	F28E10.1j.1	j	IV:4568791-4590473	+	3	4578380;4581357;4585234	4578385;4581365;4585317	5;8;83	CAGGGTGTTCG;TTTTTTTGCAGAAT;TAGTTTTGCCTCTCCGTCTTTATCAATTTCCGCCTGTCTTTCACCCTTGTAGTCACGTCCGTATTCTGTATATTCAGCATTCTCAGGTC
TCONS_00011624	XLOC_004346	F53G2.1	0.015	0.185	0.17	0.0904913	F53G2.1.1	j	II:2488626-2497009	+	1	2493278	2493283	5	TCAGACAGTGT
TCONS_00029907	XLOC_011264	nmt-1	0.482	0.653	0.17	0.0722524	T17E9.2a.1	=	III:6114481-6116331	-	1	6116168	6116174	6	TAGTTTAAGCTT
TCONS_00004966	XLOC_001972:ero-1	ero-1	0.105	0.274	0.169	0.0243929	Y105E8B.8c.1	=	I:14634140-14737061	+	1	14664234	14664449	215	TTTTGGCGCGTGTTTTTGTTCCTTTTCTGCAGGCTTCAAGTACTTTTAAGCTGCAAATTCGGAAAATTTATTGTTTATGCACTTTTTGGTCAAAATAATTTCTTAAGCAACGTGTATTTGTCCTCGATAATTTTTTTAAAAGTTTTCCAACTCGAATTCCGTCTCAAAAAATTCAAAATAAATTAACAAAAGGCAATTTATTTCGGAATTTCTTACAGTGA
TCONS_00087322	XLOC_039632:unc-58	unc-58	0.013	0.181	0.168	0.00127623	T06H11.1b.1	j	X:10104532-10135904	-	4	10105527;10106298;10107793;10130001	10105528;10106301;10107794;10130009	1;3;1;8	ACAGATT;TTTCAGGTG;TCAGTAC;TCTATTTGCAGGGT
TCONS_00021410	XLOC_008268	mfn-1	0.076	0.245	0.168	0.00123523	W02B12.9.1	=	II:11470009-11472056	-	2	11471006;11471763	11471018;11471769	12;6	AAGAATGAATTACAGGCT;AAGATTCAGGTG
TCONS_00019453	XLOC_007533	sod-1	0.208	0.374	0.166	0.0375866	C15F1.7a.1	=	II:6970667-6988629	-	1	6973501	6973514	13	TTCGTTGAATTTACAGGTC
TCONS_00024293	XLOC_009357	eri-9	0.001	0.166	0.165	4.95378e-17	C26E6.7a.2	=	III:4847008-4947317	+	1	4933376	4933382	6	AAGTTTCAGAGA
TCONS_00087725	XLOC_039782	W02H3.1	0.033	0.198	0.165	0.0793897	W02H3.1a.1	j	X:11102586-11105512	-	1	11102758	11102759	1	TCAGAAA
TCONS_00066918	XLOC_030632:cand-1	cand-1	0.613	0.776	0.162	0.0260315	Y102A5A.1.1	=	V:16789266-16814563	+	1	16805068	16805074	6	TAGTTCCAGGTT
TCONS_00020452	XLOC_007877:T24B8.4	T24B8.4	0.017	0.177	0.16	2.18988e-06	T24B8.4a.1	j	II:9062271-9080230	-	1	9064274	9064461	187	AATGTTTTTAGGGTTACCTTTGAGGCATATTGTGCCTTTTTACTGACTCTATGAAAGACTAGTATATTTAAAAATTTATACAATCTAAGTACACATCAATTTTTACAACATGCATGTATGATCCAACTCCATAAATTTCCAGATTTCTCTTGTTTCTGAGACTTTTCATTTTTAAATCTTAATATTTCAGATC
TCONS_00023600	XLOC_009088	H06I04.1	0	0.159	0.159	1.93745e-09	H06I04.1d.1	=	III:3091849-3100468	+	1	3097446	3097448	2	TTCAGCTG
TCONS_00044984	XLOC_019040:Y7A9C.1	Y7A9C.1	0.006	0.163	0.158	0.00631918	Y7A9C.1	j	IV:16294120-16300272	+	1	16295951	16295959	8	TTCATTTTCAGAAC
TCONS_00046985	XLOC_020206:Y41D4A.5	Y41D4A.5	0.081	0.239	0.158	0.00280652	Y41D4A.5.1	j	IV:1723148-1740508	-	1	1737646	1737647	1	TCAGTAG
TCONS_00020049	XLOC_007749	shw-1	0.003	0.16	0.157	0.0573987	F14F11.1b.1	j	II:8305615-8321750	-	1	8310604	8310606	2	TACAGTCC
TCONS_00039163	XLOC_015376	mbk-2	0.016	0.171	0.155	1.72679e-07	F49E11.1g.1	j	IV:13009115-13035955	+	1	13023834	13023838	4	CAGGATCATA
TCONS_00036729	XLOC_014391:F55G1.6	F55G1.6	0.625	0.779	0.154	0.0819574	F55G1.6.1	=	IV:7473476-7477344	+	1	7474155	7474159	4	CAGAAAGTTA
TCONS_00051755	XLOC_022564	C47E12.2	0.736	0.888	0.152	0.0745005	C47E12.2.1	=	IV:10001971-10003534	-	1	10003346	10003348	2	TCCAGGAA
TCONS_00008796	XLOC_003344	lid-1	0.013	0.164	0.151	0.0565403	C25A1.12a.2	=	I:10191272-10192894	-	1	10192113	10192128	15	CAGAATACATGGCTTCAGATT
TCONS_00060118	XLOC_027401:Y116A8C.25	Y116A8C.25	0	0.148	0.148	0.00100804	Y116A8C.25a.1	j	IV:17074071-17079177	-	2	17077578;17078099	17077579;17078100	1;1	TAAGAAT;TAAGGAT
TCONS_00015921	XLOC_006146:Y48C3A.14	Y48C3A.14	0.075	0.222	0.147	0.000997702	Y48C3A.14a.1	j	II:13375590-13401992	+	1	13394344	13394349	5	CAGGTATTGGC
TCONS_00086926	XLOC_039457:sec-15	sec-15	0.084	0.229	0.145	0.0694404	C28G1.3.1	j	X:8829919-8835942	-	1	8833755	8833761	6	AAGCTTCAGGGA
TCONS_00033327	XLOC_012539:hrpu-2	hrpu-2	0.152	0.296	0.144	0.0361268	Y71G10AL.1b.1	j	IV:2084033-2209092	+	1	2178463	2179392	929	TAGGCAGTGCTTTTCAAGAAAATGCGCGATTTTCAAGTGGAAAATGCTTGTGTTGAGCTCAATTTATCGAAAATTACGTGGAAATCCAAGAATTTAGGCTAAAAGTGGCTCGAAAATCAAGCTTTCGAGTCGAAATTTCAAGAAAGTGCAGAGAAAGAGAGAGAAATTCACCTTTTTCGGAGGATTTTTCACAAAAATTCTGCCTTCTGAGCCAAAATTAGTTCTGAATTCAAATTTTTTTTTTTGATGATTTTTCACTCGACGTGGGGGGAAAAGCTTAAAATTCAAGTTTTTAAGCTTTAAATAACCTTCTAGATTACATTTTAAAGGGGATTTTCACGGAAAAAGAACGATTTCTCACAATAAAACTGGAGTTTATAGCAGAATTTGGATAGGAAA…
TCONS_00050967	XLOC_022246	nhr-66	0.212	0.356	0.144	0.0566644	T09A12.4c.1	=	IV:8225673-8236602	-	2	8229332;8235909	8229593;8235934	261;25	GCCACTCTCTTACTCTCTCAGTCTCTACGTACTTCTCTATATAGTTCTCATCTATCTATATAGTTGTCTCTACCAGCATACCATCATCATCATCACTGTCATCATCAAAACCACCATCATCATTGCCATTGTACATTCAACACGCTTCGATTTATGTTTTAGAAACGTTCAAAAAATATTTGTTCTTTTTTTTCAAGAAAAATCCGAGAAAAAATCAAATAAAGATCAAAATATTAACTGTAATGGACGTGATTCGTCTTCTAGACT;AATATTAATCAATCATGCTCGTTTTAAGGAC
TCONS_00087665	XLOC_039755	T21B6.3	0.859	1	0.141	0.00399619	T21B6.3.1	=	X:10945159-10948970	-	1	10947905	10947907	2	TTCAGTGG
TCONS_00076027	XLOC_034813	nhr-95	0.002	0.141	0.139	0.0100165	Y39B6A.17a.1	j	V:19076562-19082795	-	2	19080865;19082344	19080866;19082360	1;16	TCAGATT;AAGTCAAAAAAAATTGCAGGAG
TCONS_00063632	XLOC_029029:unc-23	unc-23	0.081	0.217	0.136	0.0475562	H14N18.1a.1	=	V:8932617-8944063	+	1	8937215	8937403	188	AAATTCGAAAAATACAGTTTCGAAATCGATTTTCATTTGCCTCTGCTGAAATATGATTGAAAAACGAGAAAAAAGTGGGAGGAGTCACTCTTATCAAACAGAAACACAAGAGACACTAACCAACTCACTCATTCTTATCTTTTTTGATTCTAACTTTCATTTCTACCATCCTAATATTCAGCATGTTTCAGAAC
TCONS_00010622	XLOC_004000:etr-1	etr-1	0.011	0.145	0.134	0.00950522	T01D1.2v.1	=	II:162198-211941	+	1	166955	166961	6	AAGTTTCAGCTC
TCONS_00075695	XLOC_034676	R10E8.1	0.01	0.143	0.134	0.00132895	R10E8.1a.1	j	V:18242068-18252416	-	3	18243774;18249449;18252318	18243947;18250550;18252325	173;1101;7	GCCGTTTTAGGCTGAGAAAAAAGTAACTTGCTTCGAATTTAATGCGGTCATATTTTTGAATAAAGCGAAGCTCACATCAGCTGGCAATAGTTTTCAACAATATACGTTTACTTTATTCGTGTTGGAAACGTTATCAATGATACACAATGTATTGAAAACTGATTAAAAAATTTCAGAAC;TAGGAGGTGAGGGACAACACAAATAGTGGTGATTAGACGGCGCGACATTCTTTCCCAACGTGTGGTACTCTATCAATATTGCTAACTGTTATGTGTATCTACGAATGTACAGTATAGTCTGTATTAGTTTGCTTATCGTCACTACAATCATCAACACAGCTCGCAGCCTACAGTACGTGCAACTTCTATAGCGCCTCCTACTTTTTATGAGTTTTACTG…
TCONS_00002280	XLOC_000832:let-383	let-383	0.033	0.166	0.133	0.060464	T21G5.6.1	j	I:6862134-6872423	+	1	6868688	6868692	4	TTCAGGTCAA
TCONS_00052021	XLOC_022663	T07G12.5	0.679	0.812	0.133	0.071173	T07G12.5a.1	j	IV:10541438-10545354	-	1	10544091	10544093	2	TTCAGTCT
TCONS_00030576	XLOC_011515	ZK652.8	0.832	0.964	0.133	0.0768698	ZK652.8.1	j	III:7842163-7846709	-	2	7843561;7843676	7843564;7843678	3;2	TTTCAGCCA;TTCAGGTA
TCONS_00001447	XLOC_000505	ain-2	0	0.131	0.131	7.63847e-17	B0041.2c.1	=	I:4652144-4660264	+	1	4657206	4657212	6	AAGATTCAGAAT
TCONS_00018655	XLOC_007182:crh-2	crh-2	0.088	0.219	0.131	0.0527903	C27D6.4b.1	j	II:5172750-5187824	-	3	5184104;5187396;5187569	5184114;5187407;5187571	10;11;2	AAGTATATTTCAGCAG;CAGCTTTATTTCAGATA;TGCAGTCT
TCONS_00014933	XLOC_005720:E04D5.4	E04D5.4	0	0.127	0.127	0.0496742	E04D5.4a.1	j	II:10436135-10445557	+	1	10440887	10440914	27	ATTTTCAGCGACTATCTGCGCAGATGATCCGAA
TCONS_00060724	XLOC_027684:nhr-99	nhr-99	0.009	0.135	0.127	0.0856838	M02H5.1.1	j	V:472125-477150	+	2	475299;476405	475301;476436	2;31	TAGACAAT;CAGGTCCCGGCTCAAAAACCATTAAAATTTCCAGATG
TCONS_00076018	XLOC_034813	nhr-95	0.029	0.154	0.125	0.00689675	Y39B6A.17a.1	j	V:19076562-19082795	-	2	19080124;19080865	19080125;19080866	1;1	CCAGATG;TCAGATT
TCONS_00000400	XLOC_000131	Y92H12BR.7	0.005	0.129	0.124	0.00128032	Y92H12BR.7.1	o	I:1376941-1405534	+	1	1402092	1402097	5	CAGACGACAAT
TCONS_00033438	XLOC_012589:epg-9	epg-9	0.022	0.144	0.122	0.0399304	Y69A2AR.7c.2	=	IV:2600932-2613061	+	1	2603212	2603214	2	TTCAGTTC
TCONS_00082599	XLOC_037720:lin-15B	lin-15B	0.083	0.204	0.121	0.0426213	ZK662.4.2	j	X:15717127-15866037	+	1	15727903	15727905	2	CAGAATGC
TCONS_00084327	XLOC_038374	C14A11.6	0.005	0.126	0.121	0.0532491	C14A11.6b.1	j	X:2810395-2814177	-	3	2812116;2812835;2813187	2812121;2812838;2813201	5;3;14	ATTTCCAGAAA;ATTTAGCAT;TAGTTTTTTATTATCAGACT
TCONS_00084837	XLOC_038606	nck-1	0.001	0.122	0.121	0.0486307	ZK470.5a.1	j	X:4148647-4160292	-	1	4150757	4150762	5	TTTTTCAGGAG
TCONS_00087199	XLOC_039598	rrc-1	0	0.119	0.119	0.0255151	F47A4.3b.1	j	X:9823751-9831764	-	1	9826079	9826080	1	TCAGACC
TCONS_00079875	XLOC_036530:rig-1	rig-1	0	0.116	0.116	0.0701733	K09E2.4a.1	j	X:8647974-8681738	+	1	8661276	8661278	2	TTCAGAGG
TCONS_00002577	XLOC_000936:T24B1.1	T24B1.1	0.522	0.636	0.115	0.0201316	T24B1.1.1	=	I:7422586-7723116	+	1	7677528	7677536	8	AAGTTTTCTAGACA
TCONS_00066490	XLOC_030386	twk-34	0.076	0.189	0.113	0.0998891	K06B4.12.1	j	V:15704704-15709528	+	1	15705827	15705835	8	CAGAATTTCAGCCA
TCONS_00006859	XLOC_002614	rpl-19	0.02	0.133	0.113	0.000146411	C09D4.5.2	=	I:5484778-5486354	-	1	5485742	5485756	14	ATATTAATTTTTTACAGGAA
TCONS_00012419	XLOC_004660:ZK430.5	ZK430.5	0.011	0.122	0.111	0.000441538	ZK430.5.1	j	II:4405454-4419131	+	1	4405864	4405908	44	GTAATGCATTTCCTCAGCACACCGGACAAGAACAGCAATTGTTTCAGCAA
TCONS_00008353	XLOC_003166	F36H2.3	0.008	0.118	0.11	0.00562311	F36H2.3h.1	j	I:9250658-9261880	-	3	9255766;9257134;9258996	9255767;9257136;9258997	1;2;1	TCAGGAA;TTAAGATC;TCAGTCG
TCONS_00029112	XLOC_010975:rnf-5	rnf-5	0.891	1	0.109	3.6451e-07	C16C10.7a.1	=	III:4161236-4181468	-	1	4166164	4166166	2	TGCAGATT
TCONS_00013790	XLOC_005243:ZK1290.13	ZK1290.13	0.012	0.12	0.108	0.0334528	ZK1290.13.1	j	II:7534793-7543000	+	1	7536284	7536290	6	CAGCAATCAAAT
TCONS_00087211	XLOC_039600	ipla-2	0.01	0.116	0.107	0.0991302	F47A4.5.1	j	X:9833344-9838880	-	1	9835447	9835448	1	ACAGCCT
TCONS_00065711	XLOC_030008:sel-10	sel-10	0.09	0.196	0.105	0.0463201	F55B12.3b.1	=	V:13818131-13825222	+	1	13819630	13819636	6	CAGTTCCAGACC
TCONS_00029820	XLOC_011234	dpff-1	0.003	0.108	0.105	4.16557e-10	C28H8.9a.1	j	III:5903551-5917585	-	1	5905906	5905912	6	AAGTTGCAGACT
TCONS_00031523	XLOC_011898	T16G12.1	0.005	0.11	0.105	0.00128366	T16G12.1.1	j	III:10040180-10050125	-	3	10040664;10043075;10044719	10040665;10043076;10044720	1;1;1	TCAGAAT;TCAGATG;TAAGCTT
TCONS_00064749	XLOC_029571	ccch-1	0	0.104	0.104	0.0880066	F38B7.1a.1	j	V:11527830-11541219	+	1	11536056	11536064	8	CAGAGTCTCTGCAG
TCONS_00089072	XLOC_040341	C44H4.4	0.008	0.112	0.104	3.47439e-09	C44H4.4.1	j	X:14568755-14591821	-	1	14589101	14589104	3	TTGCAGAAT
TCONS_00087566	XLOC_039725:mbr-1	mbr-1	0.006	0.11	0.104	0.0841984	T01C1.2.1	j	X:10719553-10724141	-	1	10722052	10722054	2	CGTAGGTA
TCONS_00006199	XLOC_002361:F21A9.2	F21A9.2	0	0.103	0.103	0.045085	F21A9.2.1	j	I:3539553-3827118	-	2	3706357;3706792	3706358;3706794	1;2	GTAGGTA;TTCAGGAA
TCONS_00008792	XLOC_003344	lid-1	0.12	0.019	-0.101	0.0830136	C25A1.12a.1	=	I:10191272-10192894	-	1	10192113	10192128	15	CAGAATACATGGCTTCAGATT
TCONS_00024700	XLOC_009484	alh-9	0.129	0.027	-0.102	0.0418868	F01F1.6.2	j	III:5856017-5859189	+	1	5857209	5857210	1	CAGATGA
TCONS_00012594	XLOC_004737:gst-6	gst-6	0.121	0.014	-0.106	0.00120972	F11G11.3.1	j	II:4874395-4881105	+	1	4879885	4879900	15	TTCACATTCATTTTGTAGGAA
TCONS_00010174	XLOC_003869	pry-1	0.111	0.005	-0.107	7.15666e-05	C37A5.9.1	=	I:14171663-14179475	-	3	14173573;14176212;14178098	14173574;14176213;14178099	1;1;1	CCAGGAA;CCAGACT;TTGGATT
TCONS_00022110	XLOC_008536	snx-14	0.109	0.002	-0.107	0.0275469	Y48E1B.14a.2	j	II:13517911-13531382	-	1	13525714	13525715	1	TCAGATC
TCONS_00013449	XLOC_005115:T13C2.6	T13C2.6	0.152	0.043	-0.109	0.0480257	T13C2.6b.1	j	II:6779147-6791918	+	1	6783868	6783874	6	TAGTTTCAGAAG
TCONS_00060984	XLOC_027801	Y50D4A.1	0.984	0.873	-0.111	0.0936588	Y50D4A.1a.1	=	V:1207888-1219874	+	1	1209044	1209045	1	TCAGGCA
TCONS_00085055	XLOC_038699	K02G10.5	0.111	0	-0.111	0.0622937	K02G10.5d.1	j	X:4684877-4691718	-	2	4689238;4689995	4689239;4689996	1;1	TCAGCCT;TAAGAAT
TCONS_00032534	XLOC_012270	T05D4.3	1	0.889	-0.111	0.0749574	T05D4.3.1	=	III:13566135-13583591	-	1	13567762	13567763	1	TCAGAAT
TCONS_00059633	XLOC_027091:Y51H4A.24	Y51H4A.24	0.191	0.077	-0.114	0.0321824	Y51H4A.24.1	j	IV:16736186-16755800	-	1	16739383	16739778	395	TTTTGAATTAATAAAAATTGAATGCCTTGAATAAAAATCCCGAAAAAACATAAAATCTAATAGTAAAAAAAGGTAAATGAAACGTTAAAAAACCTTTAGAACCTTTAGAAATGCTCCTTGATTTTCCATATTCCTGTTTCGCTTCCACGTCTGGGGTAATAAAATTTTATGCCGGTCACACACCAGTATAAAGAGCTCCTCTTATCAGAAAGACTATAAAAATACCAAAATGTTCTGACTTCTCGACTTTATTCCTATTCTATATTTGAATTAATTTCAGAAAGCATTTCAGGCACATACCAGAAGCACAACCAAAATACATATAATTTCCTTGAAATTTTAGATTTTTAGAAAAAAAAATCAATGAGAATTTATAGACCATATTTTCAATTTTTCAGA…
TCONS_00071903	XLOC_032931:F46B6.5	F46B6.5	0.131	0.016	-0.115	0.00442594	F46B6.5e.1	j	V:9774893-9783062	-	1	9780269	9780425	156	TAGTAGCTTCAGTATCATCACTTCTGGTCAATTGCGATACAACGTACCAACAATTTCATGATGATTTGCAAGAAAAGATATCAAAGTCGCGTAGATCAGCAAATTTGCCCTCATTGTCGCCTGCAAACTCGGAAGAGTATTCCCATAATAATATTCCAGTGA
TCONS_00005843	XLOC_002259	sop-3	0.81	0.693	-0.116	0.0544138	Y71F9B.10b.1	=	I:2759022-2776097	-	1	2761343	2761513	170	CAGCGGAATGCCGTCTCTTGGACCACCACAGCTCCAGCGAGAGCCGCCGGCGCCGCCACCGCCGCAAATGATCCCACTGCCAAAGGATCCACCGGTGCTCCGTGAGCATCCGCGGGAACACCGAGCACACCGCGGCGGAGCAGATGACGATGGTCCCGACAGTCCGGAAGAAGGAA
TCONS_00013524	XLOC_005142:B0252.1	B0252.1	0.123	0.005	-0.117	0.0232103	B0252.1.1	j	II:6919679-6925951	+	1	6920479	6920480	1	AAGGTTG
TCONS_00002063	XLOC_000745	hrpk-1	0.916	0.798	-0.117	0.0282367	F26B1.2a.1	=	I:6317700-6324018	+	1	6318020	6318044	24	AGCATTATTCAAATAAATTTGTTTCAGGCC
TCONS_00058233	XLOC_026181:jac-1	jac-1	0.126	0.009	-0.118	0.0344239	Y105C5B.21c.1	=	IV:15997842-16026847	-	1	15999308	15999314	6	AAGTTTCAGGAA
TCONS_00009384	XLOC_003585:vab-10	vab-10	0.128	0.01	-0.118	0.0126705	ZK1151.1e.1	=	I:11707817-11923919	-	1	11771333	11771334	1	ACAGGAA
TCONS_00086503	XLOC_039276	cca-1	0.121	0	-0.121	5.36277e-06	C54D2.5d.1	j	X:7847681-7875955	-	4	7851195;7855597;7856322;7857852	7851240;7855598;7856323;7857921	45;1;1;69	TAGATCGCATCGTGTGGGCGGGTTCCGCAATTAAATCGATTTTTTCAGTGG;TCAGCGT;TCAGGTT;CAGAATAAGTTAGGAGACTACAACATAATGTCTGGAGTTGGATTATAAAGTAGCAATTAATTTTTTTTCAAGTTG
TCONS_00089990	XLOC_040730:C30G4.4	C30G4.4	0.131	0.006	-0.125	0.000275473	C30G4.4h.1	=	X:17035205-17072344	-	2	17058246;17066141	17058615;17066143	369;2	CTCGCCAAGCCACGCCTCCACCTGATCAGAAAAAGTGGCTGCTGACTTTTAGTGTCTCTTTGCCTCCCCTCCTCCTCCCGCCTTTCTCTCCCTCCCCTCCTATATCGTGTGTCTGTTTGTTTCGAACTCGAGACCAGCTATCAGTCGACCACATAAAAGCGGTCCAAACTTACTATACTTTCTTCACCTCAACCTTTTGTGTATCACTGTTATTATTGTTATTATTTGTTACTTCTACCACCACCCAGTTTTACTAACCATGTGGCATTGTGCGGTTGTTGAATGCGCTGTGAACCATGTCCCAACATATTCGCCCCATTATGGAATTTCACGGGGATGCTCTCCATCATCCTCATCCGGCTCATGTTACAGTGT;TTCAGGTG
TCONS_00068699	XLOC_031447	Y50D4A.4	0.889	0.762	-0.127	0.0672612	Y50D4A.4a.1	=	V:1184875-1207792	-	1	1194785	1194787	2	TTCAGGCG
TCONS_00025041	XLOC_009605	rbf-1	0.128	0	-0.128	0.00494726	F37A4.7b.1	=	III:6669380-6703984	+	1	6699242	6699244	2	TTTAGGTC
TCONS_00087916	XLOC_039846	hpo-34	0.757	0.627	-0.131	0.0446043	F29G6.3a.1	=	X:11511557-11519236	-	1	11518521	11518522	1	TCAGGTT
TCONS_00075860	XLOC_034748	ubc-19	0.133	0.001	-0.132	0.00587141	Y69H2.6.2	j	V:18685059-18689874	-	1	18687773	18687774	1	TCAGAGA
TCONS_00038665	XLOC_015176	trpa-1	0.134	0	-0.134	5.02378e-05	C29E6.2b.1	=	IV:11863880-11875738	+	1	11865069	11865072	3	CAGAAGATG
TCONS_00013656	XLOC_005182:fust-1	fust-1	0.156	0.018	-0.138	0.000100636	C27H5.3a.2	=	II:7142364-7155474	+	1	7152903	7152904	1	TCAGCGG
TCONS_00016210	XLOC_006265	nurf-1	0.276	0.133	-0.143	0.0342851	F26H11.2b.1	=	II:14390717-14407905	+	1	14397085	14397091	6	CAGTTCCAGAAT
TCONS_00032006	XLOC_012091:sup-1	sup-1	0.143	0	-0.143	0.0973798	Y41C4A.13.1	j	III:11724037-11750160	-	1	11737627	11737629	2	TCCAGCTT
TCONS_00071231	XLOC_032623:Y97E10AR.6	Y97E10AR.6	0.43	0.279	-0.151	0.0818529	Y97E10AR.6.1	j	V:8006166-8024940	-	2	8012292;8013950	8012293;8013951	1;1	TCAGAAA;CAGAGAA
TCONS_00006988	XLOC_002664:mtk-1	mtk-1	0.31	0.158	-0.152	0.00984701	B0414.7b.1	j	I:5768918-6033475	-	1	5795641	5795647	6	AAGTTTCAGGAC
TCONS_00079881	XLOC_036530:rig-1	rig-1	0.353	0.198	-0.155	0.00195215	K09E2.4a.1	j	X:8647974-8681738	+	1	8661276	8661278	2	TTCAGAGG
TCONS_00030922	XLOC_011664	ZK370.4	0.529	0.373	-0.156	0.0867888	ZK370.4b.1	j	III:8720200-8731411	-	1	8730043	8730044	1	TCAGCAC
TCONS_00075714	XLOC_034677	R10E8.6	0.941	0.78	-0.161	0.0014631	R10E8.6.1	=	V:18258107-18266428	-	3	18260310;18261676;18262967	18260311;18261686;18263108	1;10;141	TCAGCGA;CAGATATTTTCAGGAA;CAGACCGCCCGCTTTTCCAAGAAAGCAATAATTTCAAGGCCGATGCGCAAAAAAAAACGAACATGGACTGGAACACTCTGTTCGCGATTCTTGCCATACCAATAGGAAACATATTGTAATGGAACAAATTGCATTCTCTTCCAGCTC
TCONS_00047249	XLOC_020298	Y54G2A.12	0.985	0.825	-0.161	0.0891561	Y54G2A.12.1	j	IV:2777231-2784021	-	1	2782843	2783500	657	GCGCCGAATTTGCATAAAAATCGGGGCGCGAAATTGGAAAAGTCGATGAGAAATTAAATGGAATGTACAGTAAGCTTTAAAGGCGCATATGAGGAATTTGTGCAGCGGGTCTCGACTGGAAAATTGTTTTGAGCGCTTTAAGATTAAATTTACAGGTTTCTGGTGATAAAAACTTTAAAGGTGGTGTAGTCAAATTTGAGACTATGCTTAAAAACATTCTCTATGCTCTTACAAGTCGATGTGTGGAAGTTATGAGCCTTCAAAGTGCCAAAAAAAATCTCTTCGTTCATCTAATTTGAATTTCGCGCGCAAATGAGCGCCCCCTCGTGTGTAATCCTCTCGGACAACCAAATAATTAATTTCTTGCTTTTCGGCATTTTTAGGCGATTTTTCGTATTT…
TCONS_00024439	XLOC_009413:pqe-1	pqe-1	0.272	0.11	-0.162	0.0769994	F52C9.8b.1	=	III:5282444-5467992	+	1	5315809	5315815	6	CAGTTTCAGAAG
TCONS_00090029	XLOC_040742	K09E3.7	0.993	0.827	-0.166	0.000150138	K09E3.7.1	=	X:17131234-17134527	-	1	17133511	17133525	14	GCGTGTTATTTTTTCAGATT
TCONS_00023561	XLOC_009072	H05C05.1	0.753	0.584	-0.169	0.0731571	H05C05.1c.1	j	III:2910819-2960574	+	2	2957274;2958090	2957349;2958227	75;137	TAGAATTACTGTAGTTTTCGTGGTGGGACCCAATTTGGTGGCCCTGAAAAATTTCCAAAATTTCCAAAATTTTTGCAGAAT;TTCACGAAGTTTACCTTTGTTTCACAAATGCTAAATTTCTCTCGAGATTTTTGGAATTTTTTCGTACTTTTTTTTTTGGCAAAATCGAAATTTTGTCAAGAAAAAAAAATTAATTTTATGCCATTAAATTTGTTGCCTAGTTC
TCONS_00024288	XLOC_009357	eri-9	0.252	0.082	-0.17	0.000730602	C26E6.7a.1	=	III:4847008-4947317	+	2	4932548;4933376	4932574;4933382	26;6	TTTGTTTGAACAGTTTCTAATTTTTACAGCGT;AAGTTTCAGAGA
TCONS_00069603	XLOC_031864:ugt-32	ugt-32	0.95	0.78	-0.171	0.0362081	F47C10.6.1	=	V:3841826-3848463	-	1	3843725	3843726	1	TTAGCAA
TCONS_00005636	XLOC_002192	Y37E3.30	0.18	0.009	-0.171	0.0536776	Y37E3.30.1	j	I:2149521-2153463	-	1	2150285	2150286	1	TCAGATG
TCONS_00007256	XLOC_002773:mdt-18	mdt-18	0.258	0.084	-0.174	0.00231172	C55B7.9a.2	=	I:6490715-6496109	-	1	6493847	6494246	399	AAAAATGTTAAAAAGTAACAATTTCCGAAAGCGCAATTTAAAAAAGTACAAAAAAGTACAAACTTTTATGGAGACACTACTGATTTCTGGAATCTGTTAAATCTTAGAAATGAACTCTTTCAGAATTTCAAACTTCTTTTTTTATATGCGTAAAACTTATCGCATATATTTTATGCAATATTGAAAGTAAGTAGAGTTTTAACCATTAAAGTAACTGAAACCAGAGTTTTATCGTAAAAATGGTAAAATATTCGGGAGTGTTGGTTTCCCTGGAAATGAGTCACGTAGAGTGTGAGTCCGCAAACACCAGCTGTGAATTGCGTAGAATACATTTAATATCACGCTCAAATAGTTTTGAATTAATTTAATTTTTTAAAAACATTTTTTATTCTGTTTATT…
TCONS_00014753	XLOC_005637	C05C10.2	0.256	0.073	-0.183	4.70188e-10	C05C10.2b.1	j	II:9918046-9930830	+	1	9930448	9930454	6	TAGTTTCAGAAA
TCONS_00006847	XLOC_002611	hil-8	0.272	0.087	-0.185	0.0404722	T05E8.2.1	j	I:5462512-5471062	-	2	5466005;5466639	5466014;5466640	9;1	AAGGTTTTTCAGGTG;TCAGGAT
TCONS_00065574	XLOC_029947	Y2H9A.4	0.212	0.026	-0.186	0.0429458	Y2H9A.4b.1	j	V:13445479-13450359	+	1	13447097	13447100	3	CAGAATTCC
TCONS_00033096	XLOC_012480	K03H6.2	0.193	0.005	-0.188	0.0928508	K03H6.2a.1	j	IV:1510545-1515449	+	1	1512627	1512636	9	CAGCATATTCTCAAT
TCONS_00018284	XLOC_007009	plpp-1.1	0.435	0.247	-0.188	0.0435102	F53C3.13b.2	j	II:3919664-3931819	-	1	3927982	3927988	6	CAATTTTAGGCA
TCONS_00037884	XLOC_014825:ent-7	ent-7	0.226	0.036	-0.19	0.0564256	F44D12.9a.2	=	IV:10017424-10021286	+	1	10019016	10019263	247	AAATGACTAAACACATGCAACAAGAAGAAGAAGGCTCTCCCTTATCTTATTTTCAATGTATTTTCACATAAAATTTCGTTGTTCATAATATAAAAATCTGTAGATCTTCATGTAGAGTATAATATTTGTAATGGCAGAAAATGGGGGCAAACAACCCTGTGGGTACTAAAAATATACCAAAATTAACATTTATCAAATTCGTACCTGATAAAACCGTAAACTTGAAGCATATTGAATCAGTAACTTTCAGCAA
TCONS_00067942	XLOC_031107	nlp-26	0.215	0.025	-0.19	0.0593474	Y43F8C.2.1	j	V:19613335-19614533	+	1	19613461	19613528	67	TTCAAAAATCACTGCGCATTTTTTTAGTTCCCTTAACAAATTTTGAAATTTTTGTACTAAAAATTTCTAGAAT
TCONS_00084801	XLOC_038594	clh-4	0.191	0	-0.191	0.0705474	T06F4.2a.1	=	X:4094866-4100573	-	3	4096439;4098677;4100283	4096448;4098678;4100284	9;1;1	CAGACTTTTTAGACG;TCAGTAA;TTAGGGA
TCONS_00049754	XLOC_021653:unc-77	unc-77	0.378	0.183	-0.195	0.0859804	C11D2.6o.1	=	IV:6157309-6183872	-	4	6169017;6170186;6170804;6171406	6169018;6170187;6170805;6171548	1;1;1;142	ACAGAAA;TCAGTGC;TCAGGTT;ATATAGCAGGATACGAATTCTGTTGTTTGACTTTATATAATAATTTTCTAAAATAAATTTCAACTGTTTTAACATCTCTATAATAACTTAACAGTTTATCAAGTTTTACTCTATCGCACTCACAACTAATCTTTTTCAATTTCAGTGG
TCONS_00037308	XLOC_014617	alp-1	0.471	0.274	-0.197	4.14902e-05	T11B7.4b.1	=	IV:8852494-8867765	+	1	8860357	8860546	189	TAGTGAGATCATGGTGGTGAGATGATGACAACAACGAGAATTGAAGTTGAAAAGAAGTATCTGTAGGAGATAATTATTCATTTATTTATGTTTATCATCCGGTGTATTTCAGTAGTATTCTAGTCAAATAAAATTGTTCAATGAGCACGCACTCACCATAATTCCATCATATTCTAACAACATTCTATCTAGGTT
TCONS_00089956	XLOC_040730:gcy-11	gcy-11	0.237	0.04	-0.197	0.0254658	C30G4.3.1	j	X:17035205-17072344	-	3	17047280;17049603;17049993	17047281;17049605;17049996	1;2;3	CCAGGAA;TTCAGATG;GAACAGGTA
TCONS_00047735	XLOC_020463:hlh-30	hlh-30	0.228	0.031	-0.197	0.0984511	W02C12.3i.1	=	IV:3989101-4034925	-	3	4017634;4017837;4018331	4017635;4017838;4018332	1;1;1	TCAGTTG;TCAGGTC;CCAGCTT
TCONS_00038030	XLOC_014899	mask-1	0.356	0.159	-0.198	0.0687588	R11A8.7f.1	=	IV:10374904-10387318	+	1	10378657	10378669	12	TAGACGAGATTACAGGGA
TCONS_00007822	XLOC_003006	lin-10	0.824	0.625	-0.199	0.068297	C09H6.2a.1	=	I:8109745-8130091	-	1	8118517	8118519	2	TACAGAAA
TCONS_00025766	XLOC_009880	F42H10.3	0.222	0.022	-0.2	0.0193832	F42H10.3b.1	=	III:8478381-8491097	+	1	8487700	8487748	48	CAGAGGCTCAAGTGGATAAAGGTCCGGCAAGATTTTGTGCGGATTTTGCAGGAG
TCONS_00075909	XLOC_034777:Y17D7B.7	Y17D7B.7	0.969	0.764	-0.205	0.00227841	Y17D7B.7	=	V:18780489-18786857	-	3	18781055;18781726;18781805	18781056;18781727;18781806	1;1;1	TTAGCGA;TCAGATA;CCAGAAT
TCONS_00070084	XLOC_032084	Y47A7.2	0.206	0.001	-0.205	0.0148085	Y47A7.2.1	j	V:5163268-5213468	-	1	5197588	5197589	1	TCAGACC
TCONS_00024832	XLOC_009533:abcf-3	abcf-3	0.793	0.582	-0.211	0.0342851	F42A10.1.3	=	III:6159256-6176861	+	1	6173403	6173405	2	TTTAGGAC
TCONS_00076128	XLOC_034845	C14B4.2	0.276	0.063	-0.213	0.0633751	C14B4.2.1	j	V:19332423-19367333	-	2	19349493;19362669	19349495;19362676	2;7	TTCAGATA;CACTTTCCAGATC
TCONS_00008813	XLOC_003348:csnk-1	csnk-1	0.214	0	-0.214	1.13488e-13	Y106G6E.6.1	=	I:10227158-10237893	-	2	10229786;10230425	10229787;10230440	1;15	TCAGATC;CAGAACAACCGGTTACAGAGG
TCONS_00046546	XLOC_020057:R02D3.7	R02D3.7	0.67	0.45	-0.219	0.00842602	R02D3.7.1	=	IV:253570-257241	-	1	254095	254096	1	GCAGAAA
TCONS_00089325	XLOC_040449	T10B10.8	0.292	0.072	-0.22	0.0629838	T10B10.8.1	j	X:15160999-15166661	-	1	15163467	15163468	1	TAAGGTC
TCONS_00089782	XLOC_040684	F43B10.1	0.478	0.253	-0.225	0.0871323	F43B10.1b.1	=	X:16638225-16663111	-	1	16640910	16640911	1	ATAGTGT
TCONS_00076916	XLOC_035121	B0310.1	1	0.772	-0.227	0.08548	B0310.1b.1	=	X:492713-497510	+	1	493964	494012	48	GAGATGCGGAACAGTGCATGCCTTGCAAAGATCCACTTTAATAAAATTCAGGAC
TCONS_00013707	XLOC_005206	nhr-21	0.238	0.01	-0.228	0.00889112	F21D12.1e.1	j	II:7339227-7349180	+	1	7346509	7346510	1	TCAGAAT
TCONS_00005593	XLOC_002172	Y71G12A.4	0.235	0.007	-0.229	0.0838713	Y71G12A.4.1	j	I:1885100-1895013	-	1	1891023	1891024	1	TCAGGTT
TCONS_00019529	XLOC_007558	C27H5.4	0.271	0.036	-0.235	0.0252797	C27H5.4c.1	=	II:7162443-7166877	-	1	7163878	7163879	1	TTAGGGT
TCONS_00069454	XLOC_031811	ugt-64	0.768	0.53	-0.238	0.00043922	C07G3.9a.1	=	V:3503129-3506352	-	1	3505358	3505361	3	TTTCAGATC
TCONS_00001632	XLOC_000579:npp-6	npp-6	0.246	0.007	-0.239	0.000510358	F56A3.3a.3	=	I:5165151-5186234	+	1	5179897	5179906	9	CAGAAATTGCAGAAG
TCONS_00086893	XLOC_039444	M02D8.5	0.838	0.593	-0.245	0.0203702	M02D8.5.1	=	X:8754568-8761616	-	2	8754777;8756426	8754778;8756427	1;1	TCAGCTG;TCAGGAA
TCONS_00048815	XLOC_021071:unc-5	unc-5	0.27	0.022	-0.248	0.0247278	B0273.4d.1	=	IV:5495643-5528338	-	1	5499506	5499507	1	TCAGTTG
TCONS_00031748	XLOC_011984:Y39A1A.21	Y39A1A.21	0.679	0.431	-0.248	0.0184151	Y39A1A.21a.1	=	III:10700651-10707173	-	1	10701715	10701717	2	TTCAGATT
TCONS_00085459	XLOC_038857	rgs-6	0.259	0.008	-0.251	0.0138593	C41G11.3a.1	=	X:5720437-5733779	-	2	5724306;5726882	5724307;5726883	1;1	TCAGACA;CCAGATT
TCONS_00070588	XLOC_032318:dpy-11	dpy-11	0.785	0.532	-0.253	0.0247278	F46E10.9.2	j	V:6511587-6519409	-	1	6513346	6513348	2	TCCAGAAT
TCONS_00080345	XLOC_036690	F15G9.1	0.857	0.599	-0.258	0.0138381	F15G9.1a.1	=	X:9702239-9708563	+	1	9707328	9707362	34	GAATATACTCTTATTTAATAGCATATTTTTCATTCAGAAG
TCONS_00038595	XLOC_015145:magi-1	magi-1	0.278	0.018	-0.26	0.062036	K01A6.2a.1	=	IV:11712397-11729276	+	1	11722518	11722520	2	TTCAGGTC
TCONS_00016298	XLOC_006302:mltn-9	mltn-9	0.316	0.053	-0.263	0.0915359	F19H8.4.1	j	II:14615030-14630121	+	1	14616695	14616697	2	TGAAGGGA
TCONS_00003204	XLOC_001217	usp-48	0.44	0.177	-0.263	0.0229205	F30A10.10.1	=	I:9506392-9512236	+	1	9509463	9509469	6	TAGTTTCAGCAA
TCONS_00084651	XLOC_038524	sax-1	0.31	0.047	-0.263	0.0504113	R11G1.4b.1	=	X:3646319-3650527	-	1	3646702	3646708	6	AAGTTTCAGCAA
TCONS_00011644	XLOC_004353	K02F6.3	0.87	0.602	-0.268	0.0550042	K02F6.3.1	=	II:2545857-2565209	+	1	2547014	2547016	2	TTCAGCTG
TCONS_00005652	XLOC_002199	abt-2	0.974	0.707	-0.268	0.0484756	F12B6.1a.1	=	I:2255922-2272982	-	2	2265569;2267434	2265570;2267435	1;1	CCAGCTC;CCAGATT
TCONS_00008056	XLOC_003081	hot-5	0.976	0.707	-0.269	0.0818529	K07A12.6.1	=	I:8683219-8687365	-	2	8684126;8684453	8684127;8684454	1;1	TCAGAGT;TCAGATG
TCONS_00046952	XLOC_020194	C34H4.5	0.846	0.576	-0.27	0.00112307	C34H4.5a.1	=	IV:1545295-1567716	-	1	1550231	1550241	10	TTCAAAATTTCAGAAC
TCONS_00047434	XLOC_020357	gcy-23	0.366	0.094	-0.271	0.0385901	T26C12.4.1	j	IV:3282811-3294640	-	2	3283467;3288297	3283468;3288307	1;10	CCAGGTC;GAGAATATTAACAGTG
TCONS_00014792	XLOC_005645	lec-3	0.609	0.33	-0.279	0.0442515	ZK892.1a.1	=	II:9962965-10006085	+	1	9994143	9994276	133	AAATTTCAACCAGTGATGTCCAATCTAACCATCAAGTTTTTGAGTGGCTCCCGATGTTTTTTGTGAAACCGAGAATTTCGGGAATAGCTCAAAAACAAATTCCAACAACTCAAGTTAATATTTCGTATTATTTCAGAAC
TCONS_00068434	XLOC_031316	nhr-204	0.343	0.064	-0.279	0.000787643	R02C2.4b.1	j	V:254840-258621	-	4	255949;256121;256354;257985	255950;256122;256355;258195	1;1;1;210	TCAGGAT;TCAGTTT;TCAGCCA;GGTGGGAGATCTTTGATACGTTCAAATTTTTGAATTATATTGCCTCTAGTGGCTTTCATAATCATTTTTTTCGAAATTTATTTTTAATTTTATTAAAAGTATCGTCTGTGTTTTTTTCCTAAAAACATAACTGTAAGAAAAATTTATCGCATATAATAGTATTCATAGTAGATAATAGCCAAAAAATCCCATCTTCAAATACTTTATTTGCAGAAC
TCONS_00038162	XLOC_014945	epi-1	0.394	0.111	-0.283	0.000442411	K08C7.3f.1	=	IV:10666515-10681756	+	1	10677673	10677674	1	AAAGATG
TCONS_00008574	XLOC_003249	T05F1.5	1	0.717	-0.283	0.014627	T05F1.5.1	=	I:9633181-9636097	-	2	9633738;9634268	9633759;9634269	21;1	AGATTTCCAAAAATAACATTTCAGATT;ATAGGGT
TCONS_00084187	XLOC_038344:F52H2.4	F52H2.4	0.367	0.082	-0.284	0.0099036	F52H2.4.1	j	X:2540065-2549605	-	1	2548747	2548748	1	TCAGGGT
TCONS_00075998	XLOC_034801:Y39B6A.29	Y39B6A.29	0.338	0.051	-0.287	0.00558839	Y39B6A.29a.1	j	V:19020122-19035255	-	2	19024110;19024781	19024112;19024783	2;2	TTCAGTCA;TCCAGTAA
TCONS_00085252	XLOC_038776	ags-3	0.91	0.621	-0.288	0.00821672	F32A6.4a.2	=	X:5289727-5306328	-	1	5290670	5290671	1	TCAGATG
TCONS_00088882	XLOC_040270	F28H6.6	0.298	0.009	-0.289	4.36084e-09	F28H6.6.1	j	X:14117068-14125949	-	1	14122976	14122983	7	CAAATAAAAGCGT
TCONS_00003941	XLOC_001525:nhr-74	nhr-74	0.643	0.351	-0.292	0.0985668	C27C7.3.1	j	I:11422189-11432145	+	1	11431885	11431886	1	TCAGAAG
TCONS_00021579	XLOC_008333	clh-1	0.579	0.287	-0.292	0.0082432	T27D12.2a.1	=	II:11846439-11874861	-	1	11850529	11850530	1	CCAGGGA
TCONS_00073665	XLOC_033747	odr-3	0.354	0.058	-0.296	0.0479127	C34D1.3.1	j	V:13246374-13249542	-	3	13247303;13248215;13248560	13247304;13248216;13248561	1;1;1	TTTCAGA;TCAGTGT;TCAGTTT
TCONS_00053270	XLOC_023131:agt-1	agt-1	0.865	0.56	-0.305	0.0629089	Y62E10A.5a.1	j	IV:13356111-13430102	-	1	13370285	13370287	2	TGCAGGTA
TCONS_00021004	XLOC_008113	myrf-1	0.483	0.176	-0.307	3.64415e-05	F59B10.1.1	j	II:10496935-10506044	-	1	10500685	10500686	1	TCAGCCC
TCONS_00020687	XLOC_007999	glt-5	0.309	0	-0.309	0.000719998	Y53C12A.2.1	j	II:9706482-9708890	-	1	9707415	9707417	2	TTCAGGAT
TCONS_00047243	XLOC_020297	Y54G2A.11	0.589	0.279	-0.309	0.000942433	Y54G2A.11a.1	=	IV:2765718-2777124	-	2	2766524;2771109	2766715;2771118	191;9	TACCCAAATTGAAGCTCAGCTCTTGATGAGTTAAATACTAATTCAAAAACGATACTCTAAGAAAATTTTGGGTCTCGCCGCGAAAATCTCAAAATTATCAAATTTAGGTCAATTTTTAAAATTTTTTTTGCAATTCGCATGAAAACTTAACTTTAAAGCCCATTTATAAATTTTTGCAAGAAATTATTTTTCAGAAA;AAGATATTACAGACC
TCONS_00084323	XLOC_038374	C14A11.6	0.314	0	-0.314	0.000354421	C14A11.6a.1	=	X:2810395-2814177	-	3	2812116;2812835;2813163	2812121;2812838;2813201	5;3;38	ATTTCCAGAAA;ATTTAGCAT;TAGTTTTTTATTATCAGACTGCCAAGCGATATCAATTACAGTCA
TCONS_00027706	XLOC_010544:toca-2	toca-2	0.355	0.039	-0.315	0.0189769	K08E3.3a.1	=	III:13752405-13759434	+	1	13759285	13759291	6	AAGTTGCAGGAA
TCONS_00002277	XLOC_000832:let-383	let-383	0.32	0.002	-0.318	0.00372644	T21G5.6.1	=	I:6862134-6872423	+	1	6868688	6868690	2	TTCAGGTC
TCONS_00047013	XLOC_020211	snn-1	0.822	0.501	-0.321	0.0469852	Y38C1BA.2b.1	=	IV:1805036-1815107	-	2	1806501;1806795	1806502;1806797	1;2	CCAGGTG;TCCAGCAC
TCONS_00061065	XLOC_027840:cdc-25.2	cdc-25.2	0.779	0.45	-0.329	0.0465475	F16B4.8d	j	V:1567072-1586080	+	1	1583338	1583340	2	CAGACGAG
TCONS_00072793	XLOC_033336:des-2	des-2	0.405	0.076	-0.329	0.00794962	T26H10.1b.1	j	V:11415341-11424532	-	2	11419763;11420293	11419764;11420387	1;94	TCAGAGA;CAGACAATACATATATGTGATGTCTCATCCGTTTTGATCTTTTCAACAATTCCAAATTCCTCCTACATTCCACTTTCATCACACATTCCATTTTTAGCGA
TCONS_00084936	XLOC_038652	lst-2	0.331	0	-0.331	1.40331e-08	R160.7.1	j	X:4378003-4383371	-	2	4379282;4382139	4379290;4382140	8;1	TAGTTTATCCAGGT;TCAGCAA
TCONS_00076025	XLOC_034813	nhr-95	0.848	0.502	-0.346	0.0497949	Y39B6A.17b.1	=	V:19076562-19082795	-	3	19080124;19080865;19082344	19080125;19080866;19082360	1;1;16	CCAGATG;TCAGATT;AAGTCAAAAAAAATTGCAGGAG
TCONS_00085432	XLOC_038850:set-20	set-20	0.439	0.086	-0.353	1.47849e-06	W01C8.4b.1	j	X:5674950-5686170	-	3	5676077;5682232;5684621	5676083;5682304;5684623	6;72;2	CAATTTCAGATT;CAGACGGCTGAGAATGATGCAGAAAAACGTTCATTAAAATCAACAATTGTGGCAATAAATAAACTAATTTTTCAGTTG;TTCAGCAG
TCONS_00088709	XLOC_040194	acr-9	0.482	0.128	-0.354	0.0263163	C40C9.2.1	j	X:13639770-13662980	-	1	13644086	13644087	1	TCAGGCT
TCONS_00074857	XLOC_034249	cgt-1	0.985	0.63	-0.355	0.039627	T06C12.10.1	j	V:15880838-15892520	-	1	15888178	15888179	1	TAAGAAG
TCONS_00089016	XLOC_040310:F23D12.2	F23D12.2	0.649	0.294	-0.356	8.09294e-05	F23D12.2.1	=	X:14413493-14421811	-	1	14420679	14420680	1	TCAGCAA
TCONS_00010155	XLOC_003864:kal-1	kal-1	0.611	0.255	-0.356	0.0421172	K03D10.1.1	=	I:14128584-14155375	-	3	14130885;14131914;14133028	14130886;14131915;14133029	1;1;1	CCAGATC;GCAGGAA;TCAGTGC
TCONS_00012209	XLOC_004608:sea-2	sea-2	0.362	0.003	-0.359	2.90952e-11	K10G6.3g.1	j	II:3936272-3975039	+	1	3950145	3950173	28	AATTTCACCTTTTTTCAAATTTTTTCACAAGTCT
TCONS_00068888	XLOC_031511	F36H9.5	0.361	0	-0.361	0.0252797	F36H9.5.1	j	V:1779631-1782022	-	2	1780976;1781155	1780977;1781157	1;2	TCAGAAA;TTCAGACC
TCONS_00063387	XLOC_028917	tmd-2	0.366	0	-0.366	8.18185e-07	C08D8.2a.1	=	V:8334678-8340675	+	1	8339010	8340433	1423	AAGATTCCACCTGCCGTCCCAAAATCGTTGGTGTCACCGGAACCGAAACCATCCCTAGCGCCAAAAGCTGCTCCGGTCATTGCAACAGCTCCTCCAAAGTCTACTATTTTAATGAAACAACTATCTTTCCAAAGAGCAAGTCGAGAATCTGAAGAGGATACTGAGTTTGTACCTCCACCTGCAGTACCAGAGCCACCTAAGAAATTGGCTATCCCGAAAACTTTTATGAAGAAGGAAGAGACACCATCTTTTCAAAAAGTTGCAAAGAGGCCTACGCGACAGTGGGAACCAAAGAAACAAGAATCATTGGAACAAGAAGAACATAAGGAAACTGTGAAAGAAGAAGTTAAGAAAGAAGAGGTTAAGGAAAAAGTTCCCGCAAAAGTTGAAAGGAAACAC…
TCONS_00009848	XLOC_003775:M01E5.2	M01E5.2	0.551	0.184	-0.367	0.00350166	M01E5.2.2	=	I:13276955-13286989	-	2	13278501;13278875	13278502;13278877	1;2	TCAGCTA;TTTAGATG
TCONS_00014815	XLOC_005654	flp-4	0.546	0.178	-0.368	0.0212635	C18D1.3.1	j	II:10048913-10055594	+	1	10054623	10054625	2	TTCAGACA
TCONS_00079153	XLOC_036170:bgal-2	bgal-2	0.537	0.167	-0.37	0.066844	H22K11.2.1	j	X:6783006-6789661	+	1	6785097	6785113	16	TAGGGCCGTACATTTCTGCTGA
TCONS_00087825	XLOC_039820	gcy-9	0.371	0	-0.371	0.00125708	ZK455.2.1	j	X:11160980-11392852	-	9	11332606;11333453;11333999;11335185;11335533;11335666;11336067;11336461;11337375	11332608;11333455;11334002;11335189;11335534;11335667;11336069;11336462;11337391	2;2;3;4;1;1;2;1;16	TACAGGGA;TTTAGATC;TTTCAGTTA;TCTTCAGAAA;TTAGATT;ACAGGTA;TTCAGCAA;TCAGATT;TAGTAATTCTTTTTTCTCAGAA
TCONS_00078271	XLOC_035751	C46C11.3	0.858	0.481	-0.377	0.0999718	C46C11.3.1	=	X:4610915-4631838	+	1	4629955	4629957	2	TTCAGTTG
TCONS_00073933	XLOC_033823:swan-1	swan-1	0.542	0.164	-0.378	0.0183096	F53C11.8.2	=	V:13796640-13807448	-	1	13805881	13805882	1	CCAGGAG
TCONS_00006864	XLOC_002618:zipt-11	zipt-11	0.723	0.34	-0.384	0.0215831	F59A3.4.1	j	I:5497678-5511705	-	1	5509170	5509172	2	TTCAGCAT
TCONS_00050434	XLOC_022025	deb-1	0.837	0.451	-0.386	0.000264155	ZC477.9a.1	=	IV:7085215-7094370	-	1	7092524	7092526	2	TTTAGGTC
TCONS_00031700	XLOC_011968:T21C12.8	T21C12.8	0.46	0.071	-0.389	0.00372644	T21C12.8a.1	j	III:10551074-10565809	-	1	10552282	10552283	1	TCAGAAG
TCONS_00064469	XLOC_029421	frpr-9	0.393	0	-0.393	0.0206128	F53B7.2a.1	j	V:10992041-10995165	+	1	10993186	10993189	3	CAGTAGATT
TCONS_00019419	XLOC_007519	B0252.3	0.684	0.283	-0.401	0.021515	B0252.3c.1	=	II:6902094-6907757	-	1	6904680	6904773	93	TGAACACTCTTTCTAGTCGTGAGATTGTTGTGAGATTGTGAGATAGACCATGTTCTCTGAAAATCAAAATTAAAAGTTAAAACACTGTATTTTCAGGCT
TCONS_00068536	XLOC_031370:nhr-190	nhr-190	0.793	0.386	-0.407	0.0404722	F48G7.11a.1	=	V:628058-643089	-	2	641887;642126	641888;642128	1;2	TCAGACC;TTCAGAAT
TCONS_00012323	XLOC_004637:F31D5.7	F31D5.7	0.414	0.005	-0.409	0.000244173	F31D5.7.1	j	II:4209249-4213825	+	1	4212381	4212462	81	CAGCGGTGTCCTATTTTCTTTTTACAATAATTGAAGACATTTTGTGGCACATTTACCACACAAGTACCTTATTCAAGTTTCCAGACC
TCONS_00002963	XLOC_001102:phip-1	phip-1	0.701	0.276	-0.425	0.0695629	F36A2.8.2	j	I:8779730-8971031	+	1	8808860	8808862	2	TTCAGGGT
TCONS_00033542	XLOC_012620:Y54G2A.45	Y54G2A.45	0.878	0.452	-0.426	0.0818936	Y54G2A.45a.2	=	IV:2805339-2812848	+	1	2807848	2807855	7	AAGTTTACAGTTT
TCONS_00028320	XLOC_010722	Y22D7AL.11	0.433	0	-0.433	0.0154619	Y22D7AL.11.1	=	III:1626631-1637561	-	1	1631682	1631683	1	TCAGGTG
TCONS_00076508	XLOC_034968	mlt-4	0.943	0.51	-0.433	0.025114	ZC15.7.1	=	V:20281389-20289664	-	3	20283140;20286040;20287057	20283167;20286042;20287059	27;2;2	CAGCCAACTTCCATATTTCCATATTTCCAGGGT;TACAGATC;TTCAGATT
TCONS_00060129	XLOC_027401:Y116A8C.25	Y116A8C.25	0.83	0.39	-0.44	0.0517667	Y116A8C.25a.1	j	IV:17074071-17079177	-	2	17077578;17078099	17077579;17078100	1;1	TAAGAAT;TAAGGAT
TCONS_00012093	XLOC_004557:F19B10.4	F19B10.4	0.778	0.336	-0.442	0.0318516	F19B10.4.1	j	II:3658668-3663244	+	1	3660232	3660233	1	CAGAACT
TCONS_00075132	XLOC_034391	F36D3.5	0.941	0.498	-0.443	0.0699587	F36D3.5.1	=	V:16510210-16515240	-	1	16511496	16511497	1	TCAGAGT
TCONS_00028628	XLOC_010822	pho-9	0.892	0.443	-0.449	0.000276699	Y71H2AM.16.1	=	III:2757086-2760816	-	1	2759441	2759442	1	CCAGACA
TCONS_00015026	XLOC_005760	ptb-1	0.538	0.085	-0.454	0.0522488	D2089.4a.1	=	II:10673827-10690273	+	1	10678984	10678993	9	TAGTCTTTGAAGGCG
TCONS_00011394	XLOC_004265:ZK250.2	ZK250.2	0.629	0.167	-0.462	0.0725616	ZK250.2.1	j	II:1930990-1991528	+	1	1948693	1948751	58	GCTATGAACTTCTATTTTATATCCGTGTGTTCTATTATTTCATCCTTGGCGGTTTTAACAGAAA
TCONS_00000776	XLOC_000240	dmsr-2	0.5	0.031	-0.469	1.025e-05	Y23H5B.4.1	j	I:2533218-2542114	+	1	2541578	2541580	2	TCCAGAGA
TCONS_00009484	XLOC_003617:clp-3	clp-3	0.529	0.06	-0.469	0.0243931	Y47H10A.1.1	j	I:12069698-12087964	-	1	12083658	12083659	1	CCAGAGT
TCONS_00008935	XLOC_003392	F59C6.10	0.682	0.211	-0.471	0.0350662	F59C6.10	j	I:10530167-10531547	-	1	10531276	10531281	5	CAGAATAGATA
TCONS_00069764	XLOC_031947:nhr-125	nhr-125	0.512	0.04	-0.473	1.79844e-05	R02D1.1a.1	j	V:4320362-4325623	-	3	4321013;4322766;4324739	4321014;4322773;4324741	1;7;2	TCAGATC;TAGTTTTCAGATA;TTCAGAGT
TCONS_00011757	XLOC_004409:ZK355.2	ZK355.2	0.579	0.101	-0.478	0.0494971	ZK355.2b.2	=	II:2921102-2928199	+	1	2924042	2924059	17	CAGCCTTGTTGTAATTTCAGACG
TCONS_00014679	XLOC_005612:ZK1320.11	ZK1320.11	0.639	0.159	-0.48	0.0375866	ZK1320.11b.2	j	II:9667608-9673263	+	1	9667793	9667801	8	CAGAGTTCCGCAGA
TCONS_00087877	XLOC_039832:F46C3.2	F46C3.2	0.489	0	-0.489	1.85232e-07	F46C3.2.1	=	X:11416647-11420076	-	1	11418208	11418209	1	GCAGCAT
TCONS_00002998	XLOC_001114:snf-2	snf-2	0.531	0.018	-0.513	0.0958017	F55H12.1.1	j	I:8779730-8971031	+	1	8871791	8871885	94	GCCATATTTAGACCTTTCGTGAAAAAAATGCTGCAAAATTGAAAAAAAAAACTGGAACTTACTTTTAATCAAAGTTGATCATTATTTTATTTCGCAGTCG
TCONS_00050273	XLOC_021925	C17H12.3	0.778	0.261	-0.517	0.0838713	C17H12.3.1	=	IV:6792712-6795771	-	1	6795217	6795225	8	CTTCAGTTCAATAT
TCONS_00071574	XLOC_032789:nhr-194	nhr-194	0.587	0.071	-0.517	0.000153176	F59E11.8	j	V:8968709-8972714	-	2	8969401;8969985	8969406;8969994	5;9	TATTTCAGATA;TTTTTTTTTCAGATG
TCONS_00003687	XLOC_001423	fkb-7	0.596	0.072	-0.524	0.0137895	B0511.1.1	j	I:10667408-10671301	+	1	10668636	10668638	2	CAGTTCTT
TCONS_00083739	XLOC_038140	C25G6.3	0.855	0.328	-0.526	0.0129326	C25G6.3.1	j	X:1211727-1249838	-	1	1237420	1237421	1	TCAGCTT
TCONS_00077814	XLOC_035525	ZK563.2	0.781	0.245	-0.536	0.0976312	ZK563.2.1	j	X:3368745-3375044	+	1	3371765	3371769	4	TTTTCAGAAA
TCONS_00047266	XLOC_020306	clec-83	0.619	0.08	-0.539	2.94994e-11	Y54G2A.14.2	=	IV:2835663-2841434	-	1	2840685	2840781	96	GTTCCACCTGCCGCATTGCTGTCTTAATATCTCATGCCTACCTACCTCCTCTCTGCCTCCCTTCTAACTGTATCACACCAAAATTTTAAACTTTTTCAGATG
TCONS_00019648	XLOC_007599:kcc-3	kcc-3	0.57	0.026	-0.544	0.000272689	K02A2.3b.1	j	II:7425868-7437995	-	6	7426414;7427964;7428136;7429243;7429415;7430336	7426421;7427965;7428138;7429244;7429416;7430337	7;1;2;1;1;1	AAATTTCCAGAAG;TCAGAGC;TTCAGGAC;TCAGTCT;TCAGAGT;TTAGGTC
TCONS_00017186	XLOC_006612:bath-33	bath-33	0.556	0	-0.556	0.0311693	C08E3.3.1	=	II:1601763-1607766	-	1	1605054	1605055	1	TCAGTTC
TCONS_00087168	XLOC_039587:slc-17.9	slc-17.9	0.739	0.175	-0.564	0.0282367	T09B9.2.1	j	X:9761482-9776066	-	1	9763655	9763657	2	TTCAGAGT
TCONS_00029813	XLOC_011233	pxl-1	0.672	0.102	-0.57	5.54345e-05	C28H8.6a.1	j	III:5889720-5901669	-	1	5894130	5894292	162	AGAGAAAAGGAGCAGCACACCTTTTTCTTTTCCACGCACACAACACTTTTACCTATCACTTGGCGGAATGATGCGCGAGTTGCAACAACGGCTTGACCATTTCAATGGTCCAAATTATGCACAAAATAGTCATTCAAACCACCAACAACATCATTCGGTTTATAGCTC
TCONS_00073979	XLOC_033851	T26F2.2	0.775	0.2	-0.575	0.00225093	T26F2.2	=	V:13981262-13983241	-	3	13981792;13981983;13982551	13981793;13981984;13982552	1;1;1	CTAGGTC;ACAGAAA;TAAGGTG
TCONS_00083533	XLOC_038073	rund-1	0.721	0.134	-0.587	0.0725616	T19D7.4.1	=	X:656187-661962	-	1	661104	661106	2	TCCAGAAG
TCONS_00047140	XLOC_020259	Y38F2AR.12	0.82	0.227	-0.593	1.84407e-17	Y38F2AR.12a.1	j	IV:2399497-2420658	-	1	2401884	2401886	2	TCCAGGAA
TCONS_00031890	XLOC_012042:elo-8	elo-8	0.609	0.016	-0.593	0.0843871	Y47D3A.30a.1	=	III:11228905-11235419	-	3	11231783;11231969;11232077	11231784;11231972;11232078	1;3;1	GTAGGTA;TTTCAGTTC;TTTATTT
TCONS_00073109	XLOC_033486:kmo-2	kmo-2	0.659	0.018	-0.641	0.000258578	R07B7.4b.1	j	V:12065588-12071692	-	1	12067947	12067957	10	ACAATGCCGTCAGTTG
TCONS_00013743	XLOC_005215	C07D10.1	0.728	0.081	-0.647	0.0599589	C07D10.1.1	j	II:7398384-7402724	+	1	7398974	7399012	38	CTACTTTTATAATTTGTACAGTCTTCATTTATATATTTCAGAAA
TCONS_00012153	XLOC_004588	Y8A9A.2	0.857	0.21	-0.647	0.00132895	Y8A9A.2.1	=	II:3795374-3800831	+	1	3795782	3795794	12	CAGAGAAGCTTCGAGCGT
TCONS_00078364	XLOC_035807	tyra-3	0.757	0.104	-0.653	0.0108524	M03F4.3b.1	j	X:4948048-4955553	+	1	4951826	4951846	20	GCAGGCGGCGCTTGGCGGCTCGCTTT
TCONS_00017137	XLOC_006587	Y51H7C.12	0.909	0.236	-0.673	0.0520959	Y51H7C.12b.1	=	II:1439747-1446835	-	1	1442754	1442756	2	TTCAGGAA
TCONS_00069863	XLOC_031975	gnrr-5	0.678	0.004	-0.674	0.00241289	H22D07.1.1	j	V:4451021-4459382	-	1	4452045	4452206	161	TAGATCAAAACATAGTGGGACAGCCTGGCACCACCACGTTCCTCCTTTGAAGTCGTAGAGATGGAAAAAATACACACTACCACCGTTTAATTGGCAGAGACCAACAAACGTTGAACTAAAAAAATATATAATTAATTGACAAAAATGATTATTTCAAATTTCAGACA
TCONS_00037749	XLOC_014756:sdz-36	sdz-36	0.888	0.199	-0.689	4.29343e-05	ZK1251.7.1	o	IV:9687048-9691897	+	1	9690862	9690934	72	TAGAATATAGCTAAAATCGTTTTTATTGAGTGTTGCGTCTACCGTGTTGAAATCGTACATTTTTCCATACTTCAGAGC
TCONS_00085273	XLOC_038783	C26B9.6	0.731	0.038	-0.693	1.07702e-11	C26B9.6.1	j	X:5332365-5342202	-	2	5334571;5334686	5334572;5334687	1;1	TCAGTGA;TCAGGCG
TCONS_00000996	XLOC_000337	fog-1	0.777	0.082	-0.694	0.000442076	Y54E10A.4b.1	j	I:3211045-3228478	+	1	3212990	3212994	4	CAGATGGAAA
TCONS_00052436	XLOC_022834	M04B2.7	0.703	0	-0.703	0.000740589	M04B2.7f.1	=	IV:11524234-11548586	-	1	11532029	11532035	6	CAGTTTCAGATT
TCONS_00030093	XLOC_011324	acr-5	0.757	0.036	-0.721	1.55106e-05	K03F8.2.1	j	III:6508131-6514776	-	2	6510922;6512362	6510923;6512363	1;1	TCAGCAC;TTAGATA
TCONS_00035584	XLOC_013737	H32C10.1	0.773	0.045	-0.727	0.0600577	H32C10.1b.1	=	IV:5934345-5941599	+	2	5934444;5935004	5934446;5935019	2;15	TTCAGTGT;CAGAATAATTTTTTTCAGAGT
TCONS_00081428	XLOC_037165	adt-1	0.773	0.018	-0.755	0.0166869	C02B4.1.1	j	X:12670678-12691459	+	1	12681498	12681507	9	CAGCTATTCCAGCCC
TCONS_00031708	XLOC_011969	Y45F3A.4	0.833	0.071	-0.762	1.62434e-08	Y45F3A.4.1	=	III:10572474-10583755	-	2	10573363;10573983	10573364;10573989	1;6	CCAGAAC;TTATTTCAGCAT
TCONS_00063330	XLOC_028887	F20D6.5	0.814	0.021	-0.794	7.77707e-05	F20D6.5.1	j	V:8161943-8183442	+	1	8163549	8163550	1	CAGCAAT
TCONS_00027780	XLOC_010573:F40G9.9	F40G9.9	0.861	0.045	-0.816	4.1562e-08	F40G9.9.1	=	III:170219-184915	-	1	171521	171525	4	TTTTCAGAAA
TCONS_00084378	XLOC_038398	osm-5	1	0.168	-0.832	0.0353441	Y41G9A.1.1	x	X:2982055-2991438	+	1	2987518	2987523	5	AGTGCTGAAAG
TCONS_00027029	XLOC_010343	srd-74	0.962	0.026	-0.936	0.0933761	C24H11.4.1	j	III:11782111-11786150	+	1	11782817	11782819	2	CAGAATCA
TCONS_00063932	XLOC_029179:her-1	her-1	0.987	0.024	-0.963	0.00446597	ZK287.8a.1	j	V:9692898-9702041	+	1	9700772	9700780	8	CAGACTCCGTGTGC

## Sheet: WT_d11_vs_WT_d1
Supplemental Table S3. A3 isoforms that were differentially regulated in wild-type and daf-2 mutant animals in old age compared with those at day 1 of adulthood
A3 isoforms differentially regulated in wild-type (WT) animals at day 11 of adulthood compared with day 1 of adulthood
Isoform_ID: Detected isoform, Gene_ID and Gene_name: A gene contains the isoform, Young: Isoform fraction in young samples, Old: Isoform fraction in old samples, Difference: Old - Young, q_value: Significance of the difference
Nearest_reference_ID: A reference isoform which is the most similar to the detected isoform, Class_code: The type of match between the detected isoform and the reference isoform, A3: The number of A3 in the isoform
Class_code, =: Complete match, j: Potentially novel isoform, o: Generic exonic overlap with a reference, x: Exonic overlap with a reference on the opposite strand, s: Intronic overlaps with a reference intron on the opposite strand
Isoform_ID	Gene_ID	Gene_name	Young	Old	Difference	q_value	Nearest_reference_ID	Class_code	Locus	Strand	A3	A3_genomic_start	A3_genomic_end	Distance_between_adjacent_3′_splice_sites_of_A3	Sequence_between_adjacent_3′_splice_sites_of_A3
TCONS_00053127	XLOC_023094	F49E11.2	0.152	0.995	0.843	0.000199175	F49E11.2.1	=	IV:13035955-13039021	-	2	13036392;13037797	13036394;13037798	2;1	TCCAGTAC;TCAGATA
TCONS_00000774	XLOC_000240	dmsr-2	0.017	0.848	0.831	1.50785e-05	Y23H5B.4.1	=	I:2533218-2542114	+	1	2541578	2541580	2	TCCAGAGA
TCONS_00063329	XLOC_028887	F20D6.5	0.016	0.837	0.82	6.82672e-05	F20D6.5.1	j	V:8161943-8183442	+	1	8163549	8163553	4	CAGCAATCGA
TCONS_00017185	XLOC_006612:bath-33	bath-33	0.235	1	0.765	1.26394e-05	C08E3.3.1	j	II:1601763-1607766	-	1	1605054	1605055	1	TCAGTTC
TCONS_00079384	XLOC_036274:npr-8	npr-8	0.026	0.772	0.746	3.24431e-05	C56G3.1b.1	=	X:7344046-7388400	+	1	7385949	7385951	2	TTCAGGGA
TCONS_00080230	XLOC_036661	ZK899.3	0.172	0.89	0.717	0.0773766	ZK899.3.1	j	X:9450224-9458348	+	1	9453798	9453924	126	TAGTTTTCGTATGATGAAATTTATTTCTTCTATGTAAATTTCGTACAAGAATAAAGAGGCGGTGCCATGTTGCTTGCCCGTTAAAAGTTCATCCTACTGCTGTCAGATCCTATTTTTTTCAAATTTGAGATT
TCONS_00069142	XLOC_031622	F53E10.5	0	0.711	0.711	0.0609288	F53E10.5.1	=	V:2592486-2601738	-	1	2597018	2597190	172	CAGTTATTTTGGAACCAACGGAGTGGTTTTTAACAATTTCCCCACTGGCGCTACTCCACCTTTAAAATTTCAAATCTGCCAACCCACTCTCCGAACCCTGTGTACAGAAGAACTACGAAGAACAACATTCCGAATATTGGCAGAATAAAGAAGAATGTTGCTCAAAAGTTTTCAGAAC
TCONS_00015973	XLOC_006160	Y48E1B.8	0.117	0.826	0.709	1.01217e-07	Y48E1B.8.1	j	II:13585012-13589033	+	1	13587169	13587174	5	CAGAAACCCTT
TCONS_00016675	XLOC_006424	ptr-3	0.105	0.809	0.705	0.00105587	C41D7.2.1	=	II:362494-370928	-	2	365170;366552	365174;366553	4;1	TTTTCAGCCA;ATAGCTA
TCONS_00051888	XLOC_022619:R09E10.5	R09E10.5	0	0.692	0.692	0.0143577	R09E10.5.1	j	IV:10294443-10302372	-	1	10299539	10299540	1	CTAGATG
TCONS_00049874	XLOC_021728	sams-5	0.014	0.7	0.686	0.0222942	T13A10.11a.1	=	IV:6277390-6279572	-	2	6278699;6279179	6278778;6279184	79;5	CAGGTTCTCTGGGTGACAAGAGGATGAAACTTATCGCAACAATATGTTTCTTTACCTGTTACAACGGTTACTTTGATTACAGAAA;TATTTCAGAAG
TCONS_00073260	XLOC_033558	gcy-13	0.111	0.79	0.679	0.00451698	F23H12.6.1	j	V:12358646-12369672	-	2	12364314;12369233	12364316;12369234	2;1	TCCAGGTA;TAAGCTG
TCONS_00064475	XLOC_029422	F53B7.7	0	0.673	0.673	1.58285e-05	F53B7.7.1	j	V:10998887-10999642	+	1	10999102	10999104	2	TTCAGACA
TCONS_00086880	XLOC_039442	M02D8.7	0.29	0.962	0.672	0.060085	M02D8.7.1	j	X:8738869-8743489	-	1	8742990	8743057	67	CTCATTTTCATTTTCGTATTTCTGTGTGATAAATTTCATAAAACACATACCACGATTCCATTTTTTTTAGAAA
TCONS_00061061	XLOC_027840:cdc-25.2	cdc-25.2	0.106	0.774	0.668	5.15239e-09	F16B4.8d	j	V:1567072-1586080	+	1	1582419	1582771	352	ATCAATTTTTTCAACAGCTATAAATTTTAAAACCAAGTTTAACGAACTGTTTTCACCAAAAATTTTTCCTAGAAGGTGTATTTATCTTTCTAATATCAGTCATTCTGCTATCAAATCACCGAAATTTCTGATTTCTGACATTTTCTGCCATTTCCCGTGTTTCGAGACAAAAAACGACCTGAGTAGACCCAAATCTCACCAAGATAGACGTGTCTATTTCTAAATTTTGACCCTCTCTCCCCAGGTGAAAAGTTTCTTTTGGGATGTATTGGGTGGGACCTGAACCGCCTATTCTCAGACCACCAGGCCATCCGTCGTTGCCATTCGTACTCCTTGTGCATTCCAACATTTGCAGAAA
TCONS_00017951	XLOC_006879:sdz-35	sdz-35	0.078	0.744	0.666	0.022684	ZC239.12.1	=	II:3205678-3211381	-	1	3208218	3208219	1	TCAGCCG
TCONS_00034385	XLOC_012988	T08B6.4	0.163	0.814	0.651	0.0800256	T08B6.4.1	j	IV:4905657-4908498	+	1	4906043	4906046	3	CAGTTGGAC
TCONS_00087167	XLOC_039587:slc-17.9	slc-17.9	0.185	0.833	0.648	1.66595e-05	T09B9.2.1	=	X:9761482-9776066	-	1	9763655	9763657	2	TTCAGAGT
TCONS_00074092	XLOC_033881	ZC376.1	0.092	0.739	0.648	0.0146463	ZC376.1.1	j	V:14175515-14182960	-	1	14177353	14177354	1	TCAGATA
TCONS_00003935	XLOC_001524	Y53H1C.3	0.353	1	0.647	0.0455336	Y53H1C.3.1	j	I:11416865-11421243	+	1	11417844	11417845	1	TCAGCCA
TCONS_00079393	XLOC_036279	gad-2	0.153	0.795	0.642	0.0338729	C10A4.5.1	=	X:7393139-7403611	+	2	7393917;7395394	7394148;7395396	231;2	TATATGTGTCGCGTCAACTAGACGTTCTTGCTTTGATCAGCCTTGATATAGGTTATACCGATAATCTGTTAGTCTCTCTTTTCGAATGTGACCACTATCTCTTTTTTCTGTTAGCTTAACAAAAAAGCTACGTCTTCCACAAACCACTTACCAATATTTTTGAAGGCCAAGGTCACATGCCTTAACAATAATTTTTCCTTTCCTTGATGCTAACCCATGCTCAATGTATTTTAGGTA;TTCAGAAT
TCONS_00002703	XLOC_000985	H05L14.3	0	0.629	0.629	0.00147519	H05L14.3.1	j	I:7977812-7984713	+	1	7980120	7980125	5	TTTTTCAGAAC
TCONS_00084526	XLOC_038457	sul-1	0.108	0.73	0.623	0.0125839	K09C4.8.2	=	X:3264521-3270906	-	1	3270452	3270453	1	GTAGCTA
TCONS_00067381	XLOC_030885:Y37H2A.16	Y37H2A.16	0.339	0.958	0.619	0.0605771	Y37H2A.16	j	V:18115236-18127205	+	1	18121006	18121060	54	AAGCTAATAAGGTACCGTATTCCGCACTCGTAGATACTGGTTCCAGTATTACAGTAGCAC
TCONS_00051775	XLOC_022576:T04B2.7	T04B2.7	0.171	0.788	0.617	0.0967021	T04B2.7.1	=	IV:10054013-10056299	-	2	10054768;10055413	10054770;10055414	2;1	TGAAGGAA;TTAGAAG
TCONS_00071709	XLOC_032854:lron-2	lron-2	0.363	0.977	0.615	0.0161918	ZK682.5.2	=	V:9284128-9288024	-	1	9285745	9285746	1	ACAGTTA
TCONS_00023334	XLOC_009004	Y54F10BM.3	0.057	0.662	0.605	0.0241769	Y54F10BM.3.1	j	III:2277207-2289979	+	1	2280198	2280963	765	TTTAAGATTTTGAGCTCAAATTTATTTTGAATAGCGCTCTAAATGATTTTCTTTAAAATCTAGTACAGTAATTCATAGCAACTCATAAAACTACAGTACCAAAAGACTTTTTAAGGCGGGACCCAAAAAATTTTGAAAAAATTTTTTTTTCAATTTTTTCAAAACTCCATAACTTTGCCAATTTTCAAGATTCTGAGCCTAGATTAGTTTTAAATAGTACCCTCAATATTTTTCCATAAAATATAACATAGGAATTTACAAGAACCCGTAAAACTACAGTACCCCATAACTTTCCGTGTAGAGACCCAAAAAATTTTTGTTTTTTTTTTTGAAAAATTGGAAAAAAATTTTCAAAATTTTTTTTTTCAAACTTAAATTAATTTTACTGATTTTGTTGAA…
TCONS_00048245	XLOC_020706:Y9C9A.16	Y9C9A.16	0.029	0.629	0.6	0.0784415	Y9C9A.16b.1	j	IV:4969839-4976288	-	1	4974554	4974555	1	CTAGTTC
TCONS_00078061	XLOC_035646	R02E4.2	0.028	0.625	0.597	0.0584487	R02E4.2.1	=	X:4106944-4111595	+	1	4109585	4109586	1	TTAGGCC
TCONS_00070487	XLOC_032269	srn-1	0.107	0.703	0.595	0.0642411	K12B6.5.1	j	V:6284896-6286443	-	1	6286208	6286209	1	TCAGATT
TCONS_00084814	XLOC_038603:F09F9.4	F09F9.4	0.092	0.684	0.592	0.0246571	F09F9.4.1	j	X:4117823-4128725	-	2	4122972;4126899	4122973;4126900	1;1	TCAGATA;GCAGGCT
TCONS_00019578	XLOC_007575	aqp-1	0.137	0.721	0.583	0.0707682	F32A5.5a.1	=	II:7232852-7238349	-	1	7237037	7237101	64	TTTGATAATCAGCAGAAACCCTTCTGTTACGAGCAGTCTGCACCCTATCAATCTAACAACATTTCAGAAA
TCONS_00007851	XLOC_003016:kri-1	kri-1	0.02	0.593	0.574	0.0101148	ZK265.1a.1	=	I:8223943-8241549	-	6	8227020;8228495;8235611;8238010;8238267;8240391	8227030;8228497;8235612;8238011;8238656;8240392	10;2;1;1;389;1	CAGTTAATTATAGAGC;TTCAGACG;CCAGAAA;TTAGGTG;ATACATATTTGAAGTCAAATCTTGAGTTTCAAAACAAAACCTACCATATTTTTCTATTAGCATCGCAGGTACTCCGTTTTGAAAACTTATATCTAGGTTCCTTCTACAGATATAGAAAGTTATAAATTGCAATACTAAAGAAGAAAAACAAACATTTTGTCAGTTAGCAATTATTCTATAAAACAAAAACAATCGAATTACGAGTTTCCAAAACTTAGCAATGATGTGCAATACTACTTGAGGAATTACGGAATGTCAAACGACAGAATACCTTTGAATTTTAACGCTAGAGACACGTTCAAAATAAAATCTGGAAATTTTGTTCACGTCTGTTGCCAAATGTTTTTGAGGTGACAA…
TCONS_00087876	XLOC_039832:F46C3.2	F46C3.2	0.374	0.945	0.571	5.04137e-06	F46C3.2.1	j	X:11416647-11420076	-	2	11418208;11418760	11418209;11418779	1;19	GCAGCAT;TTTGACTTTTGTTCTTTTGCAGAAT
TCONS_00029667	XLOC_011172	pqn-25	0.355	0.918	0.564	0.0202755	D1044.3.1	=	III:5506757-5512602	-	3	5509795;5510893;5511699	5509797;5510894;5511701	2;1;2	TTAAGGTG;CCAGCCG;TCCAGAAT
TCONS_00070986	XLOC_032490	nhr-263	0.099	0.659	0.56	0.018964	F10G2.9.1	=	V:7340287-7345234	-	2	7340701;7341048	7340823;7341049	122;1	AAATTGCTCAATGGTGATTTTTCAGTAGAACTGATGCCTTCTGCTCAAGATTTTGAGCAGTACCTTTAAGATGAAACGTACATTATTTGTTTTACACTCTTCATTTTTTGATATCATAATTTCAGATG;TCAGGAA
TCONS_00088266	XLOC_040018:scd-1	scd-1	0.188	0.744	0.556	0.0514121	H20J18.1a.2	=	X:12503884-12525789	-	1	12506413	12506415	2	TTCAGGAA
TCONS_00047548	XLOC_020399	osm-9	0	0.547	0.547	0.0137584	B0212.5.1	=	IV:3550434-3559149	-	4	3555694;3556047;3556186;3556567	3555695;3556048;3556187;3556569	1;1;1;2	TTAGTCC;TTAGGCC;CTAGAGA;TTCAGGCG
TCONS_00072636	XLOC_033254	C06H2.7	0.081	0.627	0.546	0.000251408	C06H2.7b.1	=	V:11140706-11144758	-	1	11144433	11144435	2	TTTAGACG
TCONS_00030096	XLOC_011324	acr-5	0.168	0.704	0.536	0.063206	K03F8.2.1	j	III:6508131-6514776	-	4	6510922;6512362;6513083;6514599	6510923;6512363;6513118;6514605	1;1;35;6	TCAGCAC;TTAGATA;CAGACAAAACCTCATTTAAACCCATGAAACTTTTGCAGCAA;TAGTTTCAGATT
TCONS_00080972	XLOC_036955	pgp-4	0.194	0.729	0.535	0.000290029	F42E11.1a.1	=	X:11160980-11392852	+	1	11359147	11359153	6	CATTTTTAGGAG
TCONS_00052069	XLOC_022682:R102.4	R102.4	0.331	0.861	0.531	3.54594e-09	R102.4a.2	j	IV:10691990-10697491	-	1	10695574	10695581	7	CAGCTTGCAGGAC
TCONS_00020078	XLOC_007758	F49E12.8	0.111	0.634	0.523	0.0536618	F49E12.8.1	=	II:8392387-8396141	-	1	8393336	8393338	2	TGCAGTGA
TCONS_00085712	XLOC_038975	lev-9	0.103	0.623	0.52	0.00324211	T07H6.5a.1	=	X:6281557-6291732	-	3	6286844;6287045;6291281	6286845;6287290;6291282	1;245;1	GTAGGGC;AAGTTGCACTGACCAGTTGCAGTTGCACTGACCAATTTAAGTTGCACCAGTTGCACTGACCAATTTAGTTGCACTGACCAGTTACAGTTGCACTGACCAATTTTAGTTGCACTGACCACTTGCAGTTGCACTGACCAATTTTAGTTGCACTGACCAGTTGCAGTTGCACTGACCAATTTAAGTTGCACTGACCACACTTGTCGAGCCGTTTATCATTCAAATTTTTTTTTATTTTCAATAAAGTTTAGGTT;TCAGTTG
TCONS_00067940	XLOC_031106	grsp-1	0.19	0.708	0.518	0.0385201	Y43F8C.20.1	j	V:19609162-19612385	+	1	19610692	19610693	1	CAGATAA
TCONS_00009101	XLOC_003467	mltn-2	0.1	0.616	0.516	0.0385025	Y52B11A.7.1	j	I:11018479-11025845	-	1	11019968	11019983	15	GAAAATATTAATTTCCAGGTG
TCONS_00009846	XLOC_003775:M01E5.2	M01E5.2	0.283	0.798	0.515	1.05515e-06	M01E5.2.2	j	I:13276955-13286989	-	3	13278501;13278875;13282401	13278502;13278877;13282407	1;2;6	TCAGCTA;TTTAGATG;AAGTTTCAGATC
TCONS_00072984	XLOC_033430	nphp-4	0	0.508	0.508	0.000253249	R13H4.1.1	=	V:11829581-11843733	-	1	11842802	11842844	42	TAGATGGAAGAACATTCGAAAACCCGAAAAGTACAAAAATTACAGCGC
TCONS_00020554	XLOC_007931	M176.9	0.064	0.571	0.506	0.0504545	M176.9b.1	j	II:9409201-9414380	-	1	9410897	9410931	34	CAGACTCATTGCTTCTATCAATGGCAGGCTCATTGCAGGC
TCONS_00012549	XLOC_004713	F26G1.2	0.106	0.604	0.498	0.0893032	F26G1.2a.1	j	II:4762674-4770042	+	1	4763081	4763196	115	TCATTCATCTATCCGTTTCCTCGATTTTACAACTTAATGATCACGATCTTCTCTTTTCCATTTTCCCTCAATTCTACCTGGTTTTGATTTCAAAACTTACTATTTGGTTTCATTTCAGAAG
TCONS_00032506	XLOC_012260	T28A8.2	0.046	0.544	0.498	0.0958067	T28A8.2.1	j	III:13478132-13501510	-	1	13494908	13494925	17	CAGGCCAAAACATTTTTCAGAGT
TCONS_00061269	XLOC_027917:F36F12.3	F36F12.3	0.107	0.604	0.497	0.00180876	F36F12.3b	=	V:2086278-2095282	+	1	2086844	2086847	3	TTCCAGGAC
TCONS_00066656	XLOC_030481	fbxa-18	0.068	0.562	0.494	0.0639676	F10A3.3.1	j	V:16142007-16144743	+	1	16143575	16143603	28	CAGAAAGAAACTAACTGCTTTAAACATTCAGACT
TCONS_00085983	XLOC_039084:F41C6.7	F41C6.7	0.185	0.678	0.492	0.0857863	F41C6.7.1	=	X:6880846-6888002	-	2	6883009;6884249	6883010;6884250	1;1	GTAGATA;CCAGGAT
TCONS_00018104	XLOC_006933	Y49F6B.8	0.104	0.57	0.466	0.00773044	Y49F6B.8.1	j	II:3479201-3482031	-	1	3480501	3480502	1	TTAGGGT
TCONS_00075125	XLOC_034389	nhr-54	0	0.465	0.465	0.000395	F36D3.2.1	j	V:16503944-16506748	-	2	16504471;16505924	16504472;16505925	1;1	TCAGACT;CAAGTTT
TCONS_00077940	XLOC_035573	aex-4	0.186	0.649	0.462	0.013005	T14G12.2.1	j	X:3729280-3733457	+	1	3730629	3730658	29	CAGAAAAATGACGAGCCCAAAATTGCGACGTAAAG
TCONS_00087437	XLOC_039676:rme-4	rme-4	0.25	0.712	0.462	0.0992887	F46F6.1a.2	=	X:10373234-10406303	-	1	10374737	10374743	6	TAGTTCCAGAAA
TCONS_00071908	XLOC_032931:smg-4	smg-4	0.291	0.751	0.46	2.73843e-09	F46B6.3a.1	=	V:9774893-9783062	-	1	9776317	9776324	7	AAGCTTTCAGTCA
TCONS_00023640	XLOC_009106	mks-1	0	0.457	0.457	0.0193976	R148.1a.1	j	III:3186699-3192233	+	1	3188423	3188442	19	CAGGGACCCTTCCGCCGTCGAATTG
TCONS_00077776	XLOC_035509:F11D5.7	F11D5.7	0.062	0.514	0.452	0.0142209	F11D5.7.1	j	X:3282601-3307095	+	1	3300933	3300938	5	CAGGCAATGTT
TCONS_00012067	XLOC_004551	M151.2	0.428	0.879	0.451	0.000109034	M151.2.1	j	II:3630993-3636194	+	1	3632795	3632805	10	TAGCAATTTTCAGAAC
TCONS_00000455	XLOC_000147	Y73E7A.3	0.184	0.635	0.451	0.00104333	Y73E7A.3a.1	=	I:1581393-1594390	+	1	1592347	1592348	1	GCAGTTC
TCONS_00018170	XLOC_006964:srx-98	srx-98	0.047	0.499	0.451	0.0834938	F19B10.8.1	j	II:3667178-3685848	-	1	3670236	3670240	4	CAGACAGCAC
TCONS_00038838	XLOC_015258	C42C1.9	0.348	0.792	0.445	0.0398646	C42C1.9a.1	=	IV:12289448-12290994	+	1	12290165	12290166	1	CTAGATA
TCONS_00072608	XLOC_033246	lact-8	0.005	0.447	0.442	0.00553461	Y42A5A.2c.2	=	V:11087691-11097970	-	1	11092652	11092653	1	ACAGCGC
TCONS_00087094	XLOC_039544:tba-8	tba-8	0.458	0.9	0.442	0.00115625	ZK899.4.1	j	X:9450224-9458348	-	1	9457180	9457181	1	TCAGACT
TCONS_00003463	XLOC_001330	Y106G6D.4	0.064	0.501	0.437	0.067287	Y106G6D.4.1	j	I:10114758-10116746	+	1	10115566	10115567	1	CAGCATA
TCONS_00026925	XLOC_010306	spe-6	0.201	0.638	0.437	0.000389182	Y66D12A.20.1	j	III:11505487-11508949	+	1	11508207	11508209	2	CAGAGACA
TCONS_00029834	XLOC_011237	dnc-2	0.294	0.727	0.433	0.00740649	C28H8.12.1	=	III:5923186-5925756	-	1	5924989	5924990	1	TGAGATG
TCONS_00028317	XLOC_010722	Y22D7AL.11	0.567	1	0.433	0.0020096	Y22D7AL.11.1	j	III:1626631-1637561	-	1	1631682	1631683	1	TCAGGTG
TCONS_00075970	XLOC_034793	ptr-22	0	0.428	0.428	7.30678e-05	Y80D3A.7a.1	=	V:18919256-18934830	-	4	18919606;18921321;18922453;18928089	18919608;18921322;18922454;18928104	2;1;1;15	TTCAGACA;TCAGACC;TCAGAAA;TCAGTATTATAATTACAGATA
TCONS_00007615	XLOC_002916	sol-1	0.029	0.453	0.424	0.000606999	C15A11.3.1	=	I:7384397-7395920	-	2	7390296;7395622	7390297;7395623	1;1	TCAGTTG;TCAGGCA
TCONS_00024948	XLOC_009577:wht-6	wht-6	0.195	0.617	0.422	0.0389906	T26A5.1.1	j	III:6464955-6481240	+	1	6470116	6470125	9	AAGTGTTTTCAGATG
TCONS_00033921	XLOC_012791	clec-78	0.117	0.536	0.419	0.017025	F47C12.2.1	=	IV:3989101-4034925	+	1	4005102	4005104	2	TTCAGAAC
TCONS_00026090	XLOC_010014:K04H4.5	K04H4.5	0.011	0.415	0.404	0.00948808	K04H4.5.1	j	III:9347713-9365439	+	1	9360269	9360301	32	TTTATTCCCGATTTTACTTTGCCATTTCGTTACAGCGG
TCONS_00006788	XLOC_002605:coq-1	coq-1	0.372	0.776	0.404	0.0810096	C24A11.9.1	j	I:5412840-5420853	-	1	5415629	5415734	105	TCTCCTGAATGGACAGTTATATCTGTTATCAATGACTCTTTTGGCATTCTCAGAAGCCTCAATTTGCATCATTCACTTTTCAAAAAACTTATCTTCATTCACTTTCAGACC
TCONS_00077395	XLOC_035323:lsy-2	lsy-2	0.421	0.823	0.402	3.19784e-05	F49H12.1a.1	=	X:2089403-2094842	+	1	2089994	2090005	11	TTCTCTACTTTCAGAGT
TCONS_00031467	XLOC_011866	alg-4	0.469	0.869	0.4	0.011389	ZK757.3a.1	=	III:9887197-9891510	-	2	9890570;9891356	9890571;9891358	1;2	TCAGGAG;TTCAGTAC
TCONS_00076557	XLOC_034985	B0250.4	0.007	0.4	0.394	2.96011e-07	B0250.4	j	V:20457915-20468235	-	1	20464492	20464706	214	CTAATTCAGTTCAAGAAAAATTATTTAAAGGAGGACTAACGGTTCGGACGATTTTGTATTGACCCAAAATGGGCTCAAATGAACGAATTTCACAATAAAACTTTTCAAAATTTTTTACGTCAGTTCTAGGGAACTTTTCTACTTTTTGACTTGTACATAATAGTAAAATATAATAGACAACAATAATATTATTATTATTAGCGAATTTTTTTTTCAGCGT
TCONS_00032140	XLOC_012126:Y75B8A.6	Y75B8A.6	0.214	0.607	0.393	0.0563299	Y75B8A.6a.1	=	III:12123880-12130646	-	3	12125192;12127005;12127201	12125193;12127006;12127213	1;1;12	CCAGCAA;TTAGAGA;CAGAAACATTTCCAGATG
TCONS_00067040	XLOC_030677	F49H6.5	0.191	0.582	0.39	0.000990155	F49H6.5a.1	=	V:16922098-17120791	+	1	17024381	17024395	14	AAGTTGCCTCGATTTAGATA
TCONS_00010000	XLOC_003817	Y6B3B.1	0	0.39	0.39	6.81595e-05	Y6B3B.1.1	j	I:13692413-13719528	-	2	13700269;13700394	13700270;13700395	1;1	TCAGGTT;TCAGGCT
TCONS_00003474	XLOC_001336	F16C3.3	0.284	0.671	0.386	0.0186638	F16C3.3.1	j	I:10155160-10158876	+	1	10157870	10157875	5	CAGAATAATGA
TCONS_00076635	XLOC_035003	F26F2.1	0.07	0.456	0.386	0.0105399	F26F2.1.1	=	V:20558880-20562189	-	5	20559656;20559777;20560243;20560837;20561260	20559657;20559779;20560244;20560839;20561261	1;2;1;2;1	TAAGATG;TTCAGAAT;CCAGCGT;TACAGCGT;TTAGCGT
TCONS_00060701	XLOC_027681:nhr-98	nhr-98	0.05	0.435	0.385	0.000178244	M02H5.6b	=	V:450965-458275	+	1	456006	456050	44	AGCTATTTCACCACCGAAAAATAAAAATTTATAATTTGACGTTTCAGCTT
TCONS_00052432	XLOC_022834	M04B2.7	0	0.385	0.385	0.0429407	M04B2.7a.1	=	IV:11524234-11548586	-	1	11532029	11532035	6	CAGTTTCAGATT
TCONS_00005309	XLOC_002087	hasp-2	0.606	0.991	0.385	0.000796335	Y18H1A.10.1	=	I:680157-686793	-	1	684229	684231	2	TCCAGGGG
TCONS_00012409	XLOC_004656	lat-2	0.12	0.504	0.384	0.0665457	B0286.2b.1	=	II:4359081-4368332	+	1	4366178	4366179	1	CAGTTTT
TCONS_00083534	XLOC_038073	rund-1	0.216	0.598	0.382	0.0389872	T19D7.4.1	j	X:656187-661962	-	1	661104	661106	2	TCCAGAAG
TCONS_00060719	XLOC_027683:nhr-201	nhr-201	0.042	0.423	0.381	0.0464958	M02H5.3.1	j	V:462312-468560	+	1	466286	466288	2	CAGACCCT
TCONS_00086130	XLOC_039155:F46H5.3	F46H5.3	0.379	0.756	0.378	0.0757444	F46H5.3a.1	=	X:7230329-7242983	-	1	7232484	7232571	87	TCGCTTCGACTCGCACTCTCCACAATTCCACAACTCTCTCGCCCCATCGTCTCTGAGTCTGTTCACGAAAAAACATCCATCGTTATTTAGGGG
TCONS_00065030	XLOC_029704:C27A7.1	C27A7.1	0.292	0.669	0.377	0.0471166	C27A7.1a.1	=	V:12131441-12150689	+	2	12132945;12133448	12132948;12133488	3;40	TTTCAGACC;AAAAATCATTGGCAAACATAATGACTATCATTATTTATTACAGAAG
TCONS_00001018	XLOC_000350	sulp-6	0	0.375	0.375	8.219e-05	W01B11.2a.2	=	I:3287192-3293141	+	1	3292611	3292635	24	CTCCATCATAACTTTATTCTTTTTTAGAAC
TCONS_00080948	XLOC_036944	ifa-1	0.381	0.755	0.374	7.87083e-11	F38B2.1a.1	=	X:11160980-11392852	+	1	11273081	11273270	189	TTGACGCCCACCTAGTTTGCGCACCGTTGAGACTCCGCTTTTGTCTCTACAGTCAGCCTCCGACTAATTCCTTGGTCACACATTACGGCAGTCAGGGGTTGCCATACAACTCACAACCTCATTTTGAAATTTCGAAGCTGCCGAGTACAGTCGGCCCTTTTCACTTTCACAATAGAAATTTACGATTTGCAGCGA
TCONS_00016711	XLOC_006431:C24H12.9	C24H12.9	0	0.372	0.372	0.00636418	C24H12.9	j	II:416838-453397	-	2	419800;424879	419888;425043	88;164	CAGAGGGCCCGGATTAAAGTCGGTTTAAAGTCTGGAAATCTGCCAAAATTGAAAAGATTTCAATTAAACTACTGGTGGGATGAATTTACAGGCG;CAGAGATGGATATCGGATTTGTATTGAATTTTTTTCACAAAATCATCCGAGATCCATTTGCAAACGTGTTACCATAATTATGGCGCACCCTGGATGTCCTAAGCCTATTTAGGCCTAATTAAAAAGGCCAAGCTTAAAGTCTTTCCAACCGTTGCCAAAACTTTCAGCAC
TCONS_00061654	XLOC_028112	C04E12.5	0.043	0.414	0.37	0.00835875	C04E12.5a.1	j	V:3358522-3361142	+	1	3359979	3359991	12	CAGATAATGCTTCAGAAG
TCONS_00022076	XLOC_008527	tbc-14	0.411	0.777	0.366	0.0119705	E01G4.1a.1	=	II:13437578-13448198	-	2	13440909;13445250	13440911;13445256	2;6	TCCAGAAA;AAGATTCAGGAA
TCONS_00088950	XLOC_040294	E02H4.2	0.041	0.407	0.366	0.00904475	E02H4.2a.1	j	X:14277193-14281876	-	3	14278203;14280731;14280837	14278220;14280732;14280838	17;1;1	CAGACCTTCAATCATTATAGTCT;ACAGAAT;TCAGGAT
TCONS_00010806	XLOC_004039	slc-36.2	0	0.364	0.364	3.18426e-05	T27A1.5a.1	j	II:522593-530374	+	1	523470	523478	8	CAGAAAACGAGAGC
TCONS_00069602	XLOC_031864:ugt-32	ugt-32	0.042	0.404	0.362	0.0500465	F47C10.6.1	j	V:3841826-3848463	-	2	3843725;3843970	3843726;3844007	1;37	TTAGCAA;ACAATGGCTTTGCTTTTCAAATTAATGATTTTATATTCAGTAT
TCONS_00019250	XLOC_007442	lron-15	0.533	0.893	0.36	0.00103412	C56E6.6.1	=	II:6535881-6561583	-	1	6543086	6543087	1	TTAGAAC
TCONS_00071754	XLOC_032868	E02C12.8	0.205	0.562	0.357	0.0471971	E02C12.8b.1	=	V:9371616-9373804	-	1	9373365	9373366	1	GTAGGGT
TCONS_00069969	XLOC_032024	nhr-220	0.007	0.362	0.354	0.00872043	T19H12.8	j	V:4882160-4884405	-	1	4882607	4882608	1	TTAGATT
TCONS_00003942	XLOC_001525:nhr-74	nhr-74	0.005	0.358	0.353	2.59858e-07	C27C7.3.1	j	I:11422189-11432145	+	2	11431885;11432011	11431886;11432014	1;3	TCAGAAG;CAGAACCTC
TCONS_00009379	XLOC_003585:vab-10	vab-10	0.049	0.403	0.353	0.00659911	ZK1151.1k.1	=	I:11707817-11923919	-	1	11759683	11759684	1	TCAGGTT
TCONS_00077800	XLOC_035518:F11D5.1	F11D5.1	0.021	0.363	0.342	7.32034e-05	F11D5.1a.1	=	X:3332418-3347302	+	1	3334112	3334114	2	TTCAGCAG
TCONS_00037309	XLOC_014617	alp-1	0.058	0.4	0.342	3.2847e-08	T11B7.4d.1	=	IV:8852494-8867765	+	1	8860357	8860546	189	TAGTGAGATCATGGTGGTGAGATGATGACAACAACGAGAATTGAAGTTGAAAAGAAGTATCTGTAGGAGATAATTATTCATTTATTTATGTTTATCATCCGGTGTATTTCAGTAGTATTCTAGTCAAATAAAATTGTTCAATGAGCACGCACTCACCATAATTCCATCATATTCTAACAACATTCTATCTAGGTT
TCONS_00053148	XLOC_023104	dli-1	0.292	0.634	0.342	0.00198801	C39E9.14b.2	=	IV:13093941-13098836	-	1	13097823	13097829	6	AAGTTTTAGGAA
TCONS_00033543	XLOC_012620:Y54G2A.45	Y54G2A.45	0	0.339	0.339	3.60718e-07	Y54G2A.45b.1	=	IV:2805339-2812848	+	1	2807848	2807855	7	AAGTTTACAGTTT
TCONS_00070975	XLOC_032487:F10G2.7	F10G2.7	0.189	0.528	0.339	0.0866605	F10G2.7.1	j	V:7330134-7337268	-	1	7336624	7336629	5	TAGTTCAGACC
TCONS_00013441	XLOC_005114	T13C2.7	0.027	0.362	0.335	0.005571	T13C2.7.1	j	II:6779147-6791918	+	1	6780563	6780566	3	TTTCAGGTA
TCONS_00031766	XLOC_011989	K01G5.8	0.247	0.58	0.333	0.0446707	K01G5.8a.1	=	III:10740279-10740772	-	1	10740597	10740606	9	CAGAGATTCCAGAAA
TCONS_00020721	XLOC_008009:ZK1321.4	ZK1321.4	0.426	0.759	0.333	4.78668e-06	ZK1321.4a.1	=	II:9770758-9782495	-	1	9771972	9771974	2	TTCAGCTC
TCONS_00013249	XLOC_005022	lin-23	0.512	0.842	0.331	0.0105557	K10B2.1a.1	=	II:6369916-6374544	+	1	6373805	6373811	6	AAGTTTCAGCAA
TCONS_00020658	XLOC_007985	fzr-1	0.023	0.354	0.331	0.0494617	ZK1307.6.1	j	II:9636627-9646134	-	1	9641204	9641210	6	AAGCTTCAGGTA
TCONS_00020394	XLOC_007867	dep-1	0.57	0.9	0.33	0.0346916	F44G4.8a.1	=	II:9005795-9019781	-	1	9019480	9019481	1	TCAGTTC
TCONS_00000169	XLOC_000056	icd-2	0.47	0.793	0.323	0.0204941	Y65B4BR.5a.1	=	I:535790-536670	+	1	536350	536356	6	CGGTTTAAGGAG
TCONS_00051813	XLOC_022592:gst-3	gst-3	0.215	0.536	0.322	0.0832376	K08F4.11.1	=	IV:10139379-10142032	-	1	10139720	10139721	1	TCAGAAA
TCONS_00083733	XLOC_038139	C46H3.2	0.214	0.533	0.32	0.0510495	C46H3.2c.1	=	X:1211727-1249838	-	1	1214929	1214930	1	CCAGTGC
TCONS_00033345	XLOC_012553	T04C4.1	0.371	0.688	0.318	0.0617578	T04C4.1a.1	=	IV:2214428-2235795	+	1	2223715	2223717	2	TGCAGCAT
TCONS_00037950	XLOC_014857	T14G10.5	0.005	0.323	0.317	0.00437988	T14G10.5a.2	=	IV:10151948-10155636	+	1	10153118	10153124	6	AAGTTGCAGGCC
TCONS_00036760	XLOC_014409:clec-180	clec-180	0.019	0.334	0.315	0.0386898	F32E10.3a.1	j	IV:7564014-7573761	+	2	7570540;7571382	7570568;7571389	28;7	TAGTTTCTATTCAAATGTTCATTACTTGAAGATT;TAGTTTTTAGGAA
TCONS_00073479	XLOC_033659:ZC443.1	ZC443.1	0.008	0.322	0.314	0.00647758	ZC443.1.1	j	V:12806489-12811967	-	1	12808535	12808536	1	TCAGCGT
TCONS_00080343	XLOC_036690	F15G9.1	0.111	0.421	0.311	0.000137834	F15G9.1a.1	j	X:9702239-9708563	+	1	9707328	9707362	34	GAATATACTCTTATTTAATAGCATATTTTTCATTCAGAAG
TCONS_00003569	XLOC_001375	Y106G6H.1	0.153	0.46	0.308	0.0561811	Y106G6H.1.1	j	I:10429628-10432336	+	1	10430778	10430786	8	CAGTACTACATGAA
TCONS_00083986	XLOC_038254	acl-4	0.523	0.831	0.308	9.69957e-05	F49H12.6a.1	j	X:2065037-2076178	-	1	2067205	2067214	9	CAGCTTCTTCAGATT
TCONS_00073580	XLOC_033708	srr-1	0	0.308	0.308	0.00633085	W07G4.6b.1	j	V:13049729-13055413	-	1	13052233	13052235	2	TTCAGAAT
TCONS_00002428	XLOC_000894:F13G3.7	F13G3.7	0.489	0.795	0.306	0.00110841	F13G3.7b.2	=	I:7304917-7307010	+	1	7305197	7305206	9	AAGATGTTACAGATG
TCONS_00055796	XLOC_024645:coq-3	coq-3	0.67	0.972	0.302	0.051827	Y57G11C.11a.2	j	IV:14793118-14803501	-	1	14797182	14797185	3	TTTCAGATT
TCONS_00019924	XLOC_007696	pgp-11	0.019	0.32	0.301	0.0508091	DH11.3.1	j	II:7995469-8004289	-	1	7996097	7996098	1	TTAGGGT
TCONS_00080589	XLOC_036805	acr-8	0.622	0.922	0.3	0.0217472	ZC504.2.1	j	X:10412694-10428656	+	1	10412923	10412929	6	AAGATTCAGCTG
TCONS_00071126	XLOC_032579	T05B11.4	0.668	0.968	0.3	0.0306054	T05B11.4.1	j	V:7640376-7778985	-	1	7753817	7753818	1	TCAGATG
TCONS_00025419	XLOC_009744	fbn-1	0.06	0.359	0.299	5.17398e-08	ZK783.1e.1	=	III:7625375-7645837	+	1	7629293	7629299	6	CAGGTCTAGAAA
TCONS_00021410	XLOC_008268	mfn-1	0.076	0.375	0.299	0.00784979	W02B12.9.1	=	II:11470009-11472056	-	2	11471006;11471763	11471018;11471769	12;6	AAGAATGAATTACAGGCT;AAGATTCAGGTG
TCONS_00082088	XLOC_037477	jmjd-3.2	0	0.295	0.295	3.40329e-09	F23D12.5.1	j	X:14447671-14453885	+	1	14448774	14448905	131	TAGGGGTCGCAACATGCGGCATTTCTTTAAATTTCCTCAAAAGCTAGTAGATTCTCCAATTGTCAGCACAAATGATTCTGAACCAATTAATGAACAAGTTTATTCAACACAAAGTAATCATGGCGAGCTTCAAGATA
TCONS_00029729	XLOC_011202	swp-1	0.114	0.409	0.295	0.0316173	B0336.9d.1	=	III:5698429-5705464	-	2	5703109;5705325	5703115;5705364	6;39	TAGTTACAGATT;CTTATGCCTTGCAACTGTTTTAAAAGTAATGTGCATGTTCAGGAA
TCONS_00014011	XLOC_005339:ufd-2	ufd-2	0.264	0.556	0.292	0.047294	T05H10.5a.1	=	II:8062740-8073372	+	1	8062851	8062863	12	TAGTTCTTTTTTCAGGCA
TCONS_00031752	XLOC_011984:Y39A1A.21	Y39A1A.21	0.28	0.572	0.291	0.00512009	Y39A1A.21a.1	j	III:10700651-10707173	-	1	10707022	10707024	2	TTCAGGTA
TCONS_00023573	XLOC_009076	Y55D5A.1	0.707	0.996	0.289	0.0979719	Y55D5A.1a.1	=	III:2982413-2990063	+	1	2986006	2986009	3	TTCCAGAGA
TCONS_00031701	XLOC_011968:T21C12.8	T21C12.8	0.341	0.628	0.287	0.00333133	T21C12.8a.1	=	III:10551074-10565809	-	1	10552282	10552283	1	TCAGAAG
TCONS_00088952	XLOC_040294	E02H4.2	0	0.282	0.282	0.0113881	E02H4.2a.1	j	X:14277193-14281876	-	2	14280731;14280837	14280732;14280838	1;1	ACAGAAT;TCAGGAT
TCONS_00051626	XLOC_022511	egl-20	0.058	0.34	0.282	0.0836019	W08D2.1.1	j	IV:9812361-9815829	-	2	9814560;9815180	9814561;9815181	1;1	TCAGCAA;TCAGAAT
TCONS_00047159	XLOC_020263:cdh-10	cdh-10	0.015	0.296	0.281	0.059537	C45G7.5.2	j	IV:2436504-2480692	-	2	2454559;2462854	2454560;2462855	1;1	TCAGAAC;TCAGCTG
TCONS_00009345	XLOC_003573:sri-11	sri-11	0	0.28	0.28	0.048796	T22H2.3.1	j	I:11694620-11701609	-	2	11696165;11696887	11696208;11696889	43;2	CAGGTACTGTGTGTACCTTGGTGTTCACACAATGATAATTCTACAGCGT;TTCAGAAC
TCONS_00047628	XLOC_020423:Y37E11AM.2	Y37E11AM.2	0.038	0.317	0.279	0.0400013	Y37E11AM.2a.2	=	IV:3715788-3726012	-	1	3723529	3723538	9	AAGAATTTCCAGATT
TCONS_00001447	XLOC_000505	ain-2	0	0.278	0.278	3.29187e-22	B0041.2c.1	=	I:4652144-4660264	+	1	4657206	4657212	6	AAGATTCAGAAT
TCONS_00084718	XLOC_038554	fkh-9	0	0.277	0.277	0.00647758	K03C7.2c.1	=	X:3816850-3840548	-	1	3818488	3818489	1	TCAGGAC
TCONS_00064386	XLOC_029388:nrx-1	nrx-1	0.253	0.527	0.274	0.0217472	C29A12.4k.1	j	V:10812062-10846695	+	2	10825012;10841936	10825013;10842434	1;498	TCAGATG;TCCTCTATCCAATTAGATCTCTTCTGAAAGTTTCCAATTTCTTTTGTAATATGATATCTTTCTTTCCTTTCCTGATCACCTTAAATCTTAAATATTCAAAGGCTCCACCTCCCTCTTCCGATGGTATTCCTTGAGCATTTGCGTGGTGGTACGCCACGTGGCACGACTACAGTATCCCCAATATTGTGTCTAATGAATTGGAACGACGAGCAATGTCGCCAACAATTAAAAAGTTATATTCCAAAGTTTGCATCGAATTTTGATGCTCCTCGACATGTTCCTCAGCCGCCCTCATCTCCATCCTATGATTATGAAGGAGATGAGGACGAGGAAAAAAAGGAAGAAAAGGATCACGGAATCGCTGATCGAAGCATGAATGATGTGTCCGGAG…
TCONS_00050435	XLOC_022025	deb-1	0.124	0.396	0.273	2.0851e-06	ZC477.9c.1	=	IV:7085215-7094370	-	1	7092524	7092526	2	TTTAGGTC
TCONS_00072116	XLOC_033006:ZK856.5	ZK856.5	0.055	0.327	0.272	0.0226078	ZK856.5.2	j	V:10184688-10190852	-	1	10190131	10190157	26	GTTATCATTTATAATCGAATCATTTGCAGGTT
TCONS_00078239	XLOC_035734:ham-2	ham-2	0	0.27	0.27	0.00333133	C07A12.1b.1	j	X:4550587-4559404	+	1	4557334	4557340	6	CAGTTGTAGATA
TCONS_00018859	XLOC_007262	eif-3.L	0.472	0.741	0.27	0.00067673	C17G10.9c.1	=	II:5543580-5657371	-	1	5621078	5621087	9	CAGTCGTTCCAGGAA
TCONS_00029451	XLOC_011099	set-2	0.092	0.362	0.27	0.000159288	C26E6.9b.1	=	III:4847008-4947317	-	1	4925737	4925746	9	AAGCCTTCTCAGACT
TCONS_00084650	XLOC_038524	sax-1	0.641	0.909	0.268	0.0644807	R11G1.4a.1	j	X:3646319-3650527	-	1	3646702	3646708	6	AAGTTTCAGCAA
TCONS_00062489	XLOC_028509	M03F8.3	0.169	0.436	0.267	0.0950115	M03F8.3a.1	=	V:5940022-5943362	+	1	5941586	5941595	9	TAGTACTTTCAGGAA
TCONS_00004426	XLOC_001766	ptr-17	0.211	0.474	0.263	0.0512368	Y18D10A.7c.1	j	I:12834593-12843292	+	2	12839231;12842123	12839276;12842136	45;13	TAGTTCGTAGTTACTGTAGTCTTAACTATAAAGTACAAAGTATTGCAGCTC;TAGTCAAACATCGCAGGCT
TCONS_00021288	XLOC_008219:F37H8.2	F37H8.2	0.525	0.788	0.263	0.02622	F37H8.2.1	j	II:11170562-11177719	-	2	11173628;11174760	11173630;11174761	2;1	TATAGATA;ACAGATC
TCONS_00012102	XLOC_004560:F19B10.1	F19B10.1	0.147	0.408	0.26	0.0783671	F19B10.1.2	j	II:3667178-3685848	+	1	3683177	3683181	4	TTTTCAGATC
TCONS_00048816	XLOC_021071:unc-5	unc-5	0.039	0.299	0.26	0.0286702	B0273.4a.1	=	IV:5495643-5528338	-	1	5499506	5499507	1	TCAGTTG
TCONS_00029549	XLOC_011142	sumv-1	0.302	0.559	0.257	0.0810759	C34E10.8.1	j	III:5249074-5263837	-	3	5251887;5252186;5253423	5251896;5252192;5253425	9;6;2	TAGTGATTTCAGAGT;AAGTTACAGATG;TTCAGATT
TCONS_00075912	XLOC_034777:Y17D7B.7	Y17D7B.7	0	0.257	0.257	0.000483125	Y17D7B.7	j	V:18780489-18786857	-	3	18781055;18781726;18781805	18781056;18781727;18781806	1;1;1	TTAGCGA;TCAGATA;CCAGAAT
TCONS_00046549	XLOC_020057:R02D3.7	R02D3.7	0.301	0.556	0.254	0.000200398	R02D3.7.1	j	IV:253570-257241	-	1	254095	254096	1	GCAGAAA
TCONS_00050659	XLOC_022118:F55G1.15	F55G1.15	0.046	0.299	0.253	0.0184024	F55G1.15.1	j	IV:7491533-7502499	-	1	7499055	7499071	16	ATCAAAAAAAAAGTTTCAGATC
TCONS_00029967	XLOC_011282	esyt-2	0.07	0.322	0.253	0.0106586	T12A2.15a.1	j	III:6217370-6230970	-	2	6225844;6229402	6226108;6229403	264;1	AGAGATTTTATTCAAAATTGCAGTATTTTTGATTACCCAGAACGAAAAATCTGAGCAGTACGGTGCATTTTGTAGGTCGTTGTTACCTGCCTACAAGTCTTACTATAGATATATCTGCATTATATTATAGTATGCGATTCTCATTATCCAATTTCGATTAATTGTTTTGAAGTTCAACTGCGAACACTTTGGCTATAGGTAGTTATAAAAACCTAATATTCTGATGCAACATGTTATATGCGCAAACTATGAATGAACTAGTTTCAGCAT;TCAGAAG
TCONS_00075858	XLOC_034748	ubc-19	0.223	0.476	0.253	0.0447979	Y69H2.6.2	j	V:18685059-18689874	-	1	18687773	18687774	1	TCAGAGA
TCONS_00025978	XLOC_009966	cls-2	0.213	0.464	0.251	0.0271606	R107.6a.2	=	III:9055051-9058882	+	1	9058264	9058273	9	CAGTATTTGCAGGAG
TCONS_00070158	XLOC_032122	snpc-1.3	0	0.249	0.249	4.53275e-05	F08F3.9b.1	j	V:5437083-5439955	-	1	5439166	5439171	5	TAATTCAGAAT
TCONS_00031160	XLOC_011757	T23G5.2	0.538	0.785	0.248	0.00142562	T23G5.2a.2	j	III:9231414-9238053	-	1	9236322	9236328	6	TTTTTTCAGTAG
TCONS_00071191	XLOC_032614:che-7	che-7	0	0.247	0.247	0.084526	F26D11.10b.1	j	V:7957276-7969901	-	1	7961668	7961680	12	TAGAAGTGCTTGCAGTTC
TCONS_00002740	XLOC_000998	apr-1	0.286	0.532	0.246	0.0167886	K04G2.8a.1	=	I:8050042-8057029	+	1	8052482	8052488	6	TAGTTTCAGACG
TCONS_00087639	XLOC_039748:F47B10.9	F47B10.9	0.379	0.625	0.246	0.0642411	F47B10.9.1	=	X:10912117-10920013	-	1	10913215	10913216	1	TCAGTTT
TCONS_00004477	XLOC_001785:gale-1	gale-1	0.668	0.913	0.245	0.00028871	C47B2.6a.1	=	I:12964673-12982452	+	1	12975400	12975406	6	CAGTTACAGATG
TCONS_00007810	XLOC_002999	K04G2.7	0.004	0.249	0.245	0.00575993	K04G2.7a.1	=	I:8044666-8049907	-	2	8047947;8048248	8047948;8048250	1;2	GTAGAAC;TTAAGGAG
TCONS_00006251	XLOC_002380:T03F1.6	T03F1.6	0.237	0.48	0.244	0.0623562	T03F1.6b.1	j	I:3838236-3841558	-	1	3840087	3840096	9	AAGAACTTTCAGATT
TCONS_00012402	XLOC_004654:athp-2	athp-2	0.403	0.645	0.242	0.00510673	H20J04.2.1	j	II:4328812-4353159	+	1	4340151	4340182	31	AAAATGCACTATAATTTTCCCCCAATTTTAACAGAAC
TCONS_00025717	XLOC_009862	rfp-1	0.131	0.373	0.241	0.0536203	R05D3.4b.1	=	III:8356886-8368848	+	1	8359970	8359976	6	TAGTTGCAGACA
TCONS_00077551	XLOC_035404	T03G6.1	0.043	0.284	0.241	0.0693072	T03G6.1.1	j	X:2607805-2609989	+	1	2608820	2608821	1	TTCAGAT
TCONS_00021504	XLOC_008305	trr-1	0.32	0.561	0.241	0.00965268	C47D12.1a.1	j	II:11661582-11675927	-	4	11667655;11667887;11668745;11673146	11667667;11667893;11668751;11673155	12;6;6;9	TAGATTTCTTTCCAGATG;CAGTTGCAGAAA;AATATTTAGCTG;CAGAATCTTCAGTCA
TCONS_00070529	XLOC_032292:gfi-1	gfi-1	0.126	0.367	0.241	0.000350474	F57F4.3.1	j	V:6392540-6408783	-	1	6393696	6398944	5248	CAGCAATATCCTCTGCTACGTCGGATTCTATGCCAACAACACTACTCCAGGATTCGGATCAGGGGACACCGTCACTTGCTCCGCAGGAAATGTATGTACCAGTGTTTCTGGAGTCTACAACGGATACGACGCTGCTGCCTACGCTTGCATGCCACAAGGACTTTGCGACGGCATCTTCCCAAATATTGACCCAAATAATCCAATCGCCTGCACCAATCTCGCTGGAACCAACATTCAAGGATGCTGCTGTTACAAGCAAGATTGTACTAGCCTCGCTCCAATGAACAACCCACCAACTCCATCTCCATGGAACAAGAACAACCAGACATGCTATCAAGGAATTTCCGTCAACGGAGCTCTCTTGTATGGAGGATCCTTCTCTCAATGCTTGGGAGAATG…
TCONS_00029443	XLOC_011098:ula-1	ula-1	0	0.24	0.24	1.51944e-18	C26E6.8a.1	=	III:4847008-4947317	-	1	4919233	4919239	6	AAGTTTCAGATT
TCONS_00048582	XLOC_020917:F36H12.17	F36H12.17	0.027	0.268	0.24	0.0052011	F36H12.17.1	j	IV:5261912-5398591	-	4	5268420;5270546;5271857;5276875	5268421;5270547;5271858;5276876	1;1;1;1	CCAGACA;TCAGAAC;TCAGGTT;GTAGAGT
TCONS_00024235	XLOC_009333	tag-325	0.484	0.723	0.239	0.0680317	C38D4.5b.1	=	III:4796838-4802907	+	1	4797569	4797575	6	AAGCTTCAGCCG
TCONS_00074775	XLOC_034194	nhr-53	0.016	0.254	0.238	0.0168127	K06B4.11.1	j	V:15700605-15703324	-	2	15701457;15702052	15701458;15702053	1;1	CCAGAAC;TCAGAGC
TCONS_00021986	XLOC_008496	F42G4.7	0.001	0.238	0.237	0.0070218	F42G4.7.1	j	II:13043926-13050827	-	1	13047285	13047287	2	TTTAGGTT
TCONS_00077854	XLOC_035550	C12D12.1	0	0.236	0.236	0.0866256	C12D12.1a.1	j	X:3499252-3511529	+	1	3501165	3501313	148	ATAGATATGAGTCAGAAATACGGAGAGAATCAGTGTGAAAAGGTTTTTCCCCTGATTGGCCTTACCGTGCTCCACTTTTCCCGTCGCCCGCCATATGGATCACACCGTTCTTATAGCCCTACTACTGGCGTTCTGCTCCACAGCCAGCGCCGTC
TCONS_00063230	XLOC_028846:F40A3.2	F40A3.2	0.427	0.663	0.236	0.0111739	F40A3.2.1	j	V:7877489-7881403	+	1	7881200	7881227	27	TAGAAGAAGTCATAAAAATGAGAAATTCAGCAA
TCONS_00014681	XLOC_005612:taf-8	taf-8	0.268	0.503	0.234	0.0447979	ZK1320.12a.1	=	II:9667608-9673263	+	1	9671250	9671256	6	AAGTTCCAGACG
TCONS_00010175	XLOC_003869	pry-1	0.449	0.683	0.233	0.0743758	C37A5.9.1	=	I:14171663-14179475	-	3	14173573;14176212;14178098	14173574;14176213;14178099	1;1;1	CCAGGAA;CCAGACT;TTGGATT
TCONS_00063034	XLOC_028757:srj-14	srj-14	0.028	0.26	0.232	0.00148572	C03G6.3b	j	V:7369309-7375594	+	1	7369838	7369843	5	TAGCGTCTGCG
TCONS_00052239	XLOC_022749	bcc-1	0.114	0.346	0.232	0.0924634	M7.3.1	j	IV:11086073-11092853	-	1	11089692	11089693	1	TCAGAAA
TCONS_00022806	XLOC_008809:B0353.1	B0353.1	0	0.23	0.23	0.083699	B0353.1b.1	j	III:491355-576447	+	1	565560	565568	8	CAGCCATCTCGAAG
TCONS_00037218	XLOC_014598	dic-1	0.214	0.442	0.229	0.00470247	F08B4.1a.1	=	IV:8678020-8696553	+	1	8693174	8693183	9	AAGACTTTACAGCTG
TCONS_00039305	XLOC_015428:csn-6	csn-6	0.009	0.238	0.229	0.0877653	Y67H2A.6a.1	=	IV:13300827-13310818	+	1	13302937	13302952	15	TAGGAATGTTTGTTCCAGGAT
TCONS_00050657	XLOC_022118:F55G1.15	F55G1.15	0.009	0.238	0.229	0.0368623	F55G1.15.1	j	IV:7491533-7502499	-	1	7499055	7499071	16	ATCAAAAAAAAAGTTTCAGATC
TCONS_00086585	XLOC_039306:dim-1	dim-1	0.067	0.295	0.228	5.1246e-05	C18A11.7a.1	=	X:8050475-8065688	-	1	8057884	8057885	1	TCAGGCT
TCONS_00029907	XLOC_011264	nmt-1	0.482	0.711	0.228	0.00451698	T17E9.2a.1	=	III:6114481-6116331	-	1	6116168	6116174	6	TAGTTTAAGCTT
TCONS_00012029	XLOC_004534	lgc-45	0.059	0.287	0.227	0.0014383	W10G11.16a.1	=	II:3554821-3567490	+	1	3564625	3564661	36	TAGATAGTGCTTCTCCCAAGCTCAACCGACAGTTCTAAGGAA
TCONS_00039913	XLOC_015779:lin-66	lin-66	0	0.226	0.226	0.00085326	B0513.1a.1	j	IV:13887922-13894016	+	1	13888081	13888089	8	CAGTATTCCAGTAT
TCONS_00081283	XLOC_037096:E01G6.3	E01G6.3	0.004	0.23	0.226	0.00514722	E01G6.3.1	j	X:12241447-12258971	+	1	12242980	12243013	33	CAGACATATCGATCCTGATCACAAACTTATCAATAGAAT
TCONS_00004966	XLOC_001972:ero-1	ero-1	0.105	0.331	0.226	0.00190855	Y105E8B.8c.1	=	I:14634140-14737061	+	1	14664234	14664449	215	TTTTGGCGCGTGTTTTTGTTCCTTTTCTGCAGGCTTCAAGTACTTTTAAGCTGCAAATTCGGAAAATTTATTGTTTATGCACTTTTTGGTCAAAATAATTTCTTAAGCAACGTGTATTTGTCCTCGATAATTTTTTTAAAAGTTTTCCAACTCGAATTCCGTCTCAAAAAATTCAAAATAAATTAACAAAAGGCAATTTATTTCGGAATTTCTTACAGTGA
TCONS_00075963	XLOC_034793	ptr-22	0.024	0.249	0.225	0.00732662	Y80D3A.7a.1	j	V:18919256-18934830	-	4	18919606;18921321;18922453;18928089	18919608;18921322;18922454;18928104	2;1;1;15	TTCAGACA;TCAGACC;TCAGAAA;TCAGTATTATAATTACAGATA
TCONS_00038781	XLOC_015230	eri-12	0.333	0.557	0.224	0.0235393	B0001.6.1	=	IV:12156837-12164266	+	1	12162808	12162814	6	AAGTTTCAGATC
TCONS_00001713	XLOC_000610	F27C1.2	0.239	0.463	0.224	0.0510131	F27C1.2a.1	=	I:5430163-5431449	+	1	5430761	5430773	12	TAGTTTGCACTTCAGACA
TCONS_00015413	XLOC_005952	F43G6.4	0.158	0.381	0.222	0.0221223	F43G6.4.1	j	II:11785782-11805924	+	1	11790759	11790761	2	TCCAGGAA
TCONS_00064633	XLOC_029506	C03E10.3	0.02	0.242	0.221	0.0997445	C03E10.3.1	j	V:11286167-11288708	+	2	11286818;11286961	11286819;11286997	1;36	TCAGATC;TAGGAATAATTCATTCAAGTTTTCTTGAAATTATTTAAGATT
TCONS_00003521	XLOC_001362:aph-2	aph-2	0.354	0.575	0.221	0.0308828	ZC434.6a.1	=	I:10336388-10345648	+	1	10344564	10344570	6	CAGTTTCAGATG
TCONS_00006852	XLOC_002613	C09D4.4	0.002	0.223	0.221	0.0532407	C09D4.4a.1	=	I:5479549-5484643	-	2	5482649;5483691	5482655;5483700	6;9	AAGTTGAAGGAT;CAGTTATTACAGGCA
TCONS_00018368	XLOC_007052	ntl-2	0.265	0.485	0.22	0.0762354	B0286.4a.2	=	II:4372739-4386343	-	1	4374698	4374699	1	TCAGCTA
TCONS_00087566	XLOC_039725:mbr-1	mbr-1	0.006	0.224	0.218	0.00231728	T01C1.2.1	j	X:10719553-10724141	-	1	10722052	10722054	2	CGTAGGTA
TCONS_00047139	XLOC_020259	Y38F2AR.12	0.02	0.238	0.218	0.00189787	Y38F2AR.12a.1	j	IV:2399497-2420658	-	1	2401884	2401886	2	TCCAGGAA
TCONS_00001905	XLOC_000651:vps-34	vps-34	0.284	0.501	0.217	0.0553661	B0025.1c.1	=	I:5768918-6033475	+	1	6029772	6029949	177	CACAGTTTTGGTCTATTTTGAAATCTAACAATTGAGAAACTACAATTTCTGTTTCAAAGAATCAATTATTTTATTCGAAAAGCCTTCCATATTATAATTTTCAACCCAAATTAATTCTACTATGATTTAAAATAACCAAACCAATCAAAAAAAATTTTATCTTGAACTTCGAATTTTCAGATG
TCONS_00005273	XLOC_002077	grl-16	0.042	0.258	0.216	0.0401804	Y65B4BR.6a.1	=	I:572176-575120	-	1	573893	574073	180	CAGTTGTCGAGCAAGTCGCACCAGTCGCCACATACACCCAGGGGCCAGTCCCAACACCAGTCGAGCAGGTCGTCGAGACTGTTGTCGAGCCACAGCAAGCACCAGAACCAGAACAAGCACCAGAACCACAGCAAGCACCAGAGCCAACCGTAGTCGAGACTGTCCAAGAGGAAATCGTTCCAGAAA
TCONS_00071915	XLOC_032931:F46B6.5	F46B6.5	0.071	0.286	0.215	0.0660739	F46B6.5c.1	=	V:9774893-9783062	-	1	9780269	9780425	156	TAGTAGCTTCAGTATCATCACTTCTGGTCAATTGCGATACAACGTACCAACAATTTCATGATGATTTGCAAGAAAAGATATCAAAGTCGCGTAGATCAGCAAATTTGCCCTCATTGTCGCCTGCAAACTCGGAAGAGTATTCCCATAATAATATTCCAGTGA
TCONS_00074338	XLOC_033995	unc-61	0.43	0.645	0.215	0.00261927	Y50E8A.4b.1	=	V:14729642-14734482	-	1	14731718	14731730	12	AAGCGTCGATTGCAGAAA
TCONS_00081378	XLOC_037148:tbc-13	tbc-13	0.78	0.994	0.214	0.000746747	F45E6.3.1	j	X:12313017-12501748	+	1	12488507	12488609	102	CAGCAATTTTTTGAGTATTCCTACAAGTTTTCACAAGAGTCTTTAGTCTTTAGAAAAAATTGTTTCAATTTAATGCCAAACATACTAAATCAATTTATTATTAAGATT
TCONS_00012836	XLOC_004845	clr-1	0.421	0.635	0.214	0.0923236	F56D1.4d.1	=	II:5466345-5473894	+	1	5466595	5466601	6	TAGCTTCAGATC
TCONS_00038663	XLOC_015176	trpa-1	0.01	0.222	0.212	4.14532e-07	C29E6.2a.1	j	IV:11863880-11875738	+	1	11865069	11865072	3	CAGAAGATG
TCONS_00065792	XLOC_030049:R10D12.13	R10D12.13	0.019	0.231	0.212	0.0617167	R10D12.13c.1	=	V:13962281-13965797	+	2	13962613;13962771	13962680;13962777	67;6	TAGGTATCAAAAATACCTGGAACCAGTAGATGGTCAAATTTTCGCTGATAATGATGATTTTGTGGTTCAGAGT;CAGTTTCAGAAA
TCONS_00005430	XLOC_002118	R06A10.4	0.069	0.278	0.209	0.000465528	R06A10.4.1	j	I:1068483-1106364	-	1	1090202	1090203	1	CCAGACC
TCONS_00005024	XLOC_001994	let-49	0.375	0.582	0.207	0.00767776	Y54E5B.3b.1	=	I:14820380-14821651	+	1	14820637	14820643	6	AAGATTCAGGTT
TCONS_00017114	XLOC_006576	Y51H7C.9	0	0.206	0.206	0.0262037	Y51H7C.9.1	j	II:1409123-1420150	-	1	1409413	1409414	1	TAAAGGA
TCONS_00066918	XLOC_030632:cand-1	cand-1	0.613	0.818	0.205	0.0934704	Y102A5A.1.1	=	V:16789266-16814563	+	1	16805068	16805074	6	TAGTTCCAGGTT
TCONS_00081179	XLOC_037044	T08D10.3	0	0.204	0.204	0.0275636	T08D10.3.1	j	X:11954406-11956495	+	1	11955571	11955572	1	CAGGTTG
TCONS_00032045	XLOC_012104:faah-5	faah-5	0.055	0.257	0.203	0.007063	Y56A3A.5.1	=	III:11885955-11893022	-	2	11889189;11890342	11889190;11890343	1;1	TCAGATG;TAAGAGG
TCONS_00080162	XLOC_036645:B0416.2	B0416.2	0.774	0.975	0.201	0.0669545	B0416.2.1	=	X:9298345-9310601	+	1	9299364	9299382	18	TAGGAATTTATTATATTCTAGTTG
TCONS_00005355	XLOC_002105	pde-6	0.048	0.249	0.201	0.0997445	Y95B8A.10a.1	j	I:872310-882713	-	2	874742;877914	874743;877915	1;1	CCAGACT;TCAGACG
TCONS_00007590	XLOC_002909	inx-14	0.376	0.576	0.2	0.00646666	F07A5.1a.1	=	I:7339203-7352235	-	2	7350600;7352086	7350606;7352088	6;2	TAGTTGCAGACC;TTCAGTTC
TCONS_00031665	XLOC_011955:H04D03.2	H04D03.2	0.181	0.38	0.199	0.00293386	H04D03.2a.1	j	III:10428333-10442657	-	1	10438415	10438421	6	CAGTTTCAGCAA
TCONS_00020420	XLOC_007874	T24B8.7	0.129	0.329	0.199	0.00854957	T24B8.7c.2	=	II:9041522-9053824	-	3	9047822;9048421;9049811	9047831;9048428;9049817	9;7;6	AAGACTTTTCAGTTC;CAGTTTTTAGGGT;TAGCTTCAGAAG
TCONS_00043224	XLOC_017853:Y73F8A.26	Y73F8A.26	0.034	0.231	0.197	0.0967837	Y73F8A.26a.1	j	IV:15445367-15477512	+	1	15474602	15474604	2	TAGACAAT
TCONS_00032130	XLOC_012123	Y75B8A.3	0.001	0.198	0.197	2.64205e-05	Y75B8A.3.1	j	III:12101751-12107540	-	2	12102674;12105100	12102676;12105104	2;4	TTCAGATT;CATTTAGGCT
TCONS_00036708	XLOC_014382	unc-82	0.02	0.216	0.196	0.0332607	B0496.3e.1	j	IV:7424497-7445504	+	4	7428926;7437441;7440203;7443007	7428934;7437479;7440282;7443052	8;38;79;45	CAGGTGGACGAATG;ATTGATATTTTAGATTTAGAACTAACCGGCTTTTGATTTAGGCA;TATGTATATTTTAACGATTTCTGTGGAATAAATTCACCCGGTCCTCTATTTGCTCCCCCGTGGCCACAAATTATTTTTCCAGACA;CAGCATGAATTTCTTGATCAACTTCTAAGCATGCGTTTCATTCTCCAGGTG
TCONS_00031076	XLOC_011727	R107.5	0.228	0.424	0.196	0.016441	R107.5a.1	=	III:9051591-9053793	-	1	9052371	9052377	6	AAGTTGCAGGGA
TCONS_00007924	XLOC_003040	F02E9.5	0.621	0.817	0.195	0.00715821	F02E9.5a.2	=	I:8416830-8435864	-	1	8425786	8425793	7	TTCTTTGCAGCAG
TCONS_00019594	XLOC_007584:C30G12.6	C30G12.6	0.478	0.67	0.193	0.0210351	C30G12.6a.1	j	II:7292191-7299222	-	2	7292391;7296377	7292400;7296378	9;1	TAGCTTTTCCAGTAT;GCAGCAA
TCONS_00072559	XLOC_033220	pptr-2	0.11	0.302	0.192	0.0714302	C13G3.3a.2	=	V:11027152-11030917	-	1	11029270	11029282	12	CAGATTTAATTTCAGGGC
TCONS_00009063	XLOC_003458	tag-296	0.183	0.374	0.191	0.0201305	F49D11.9a.1	=	I:10933809-10945690	-	1	10934236	10934239	3	TAGCAGGAT
TCONS_00077873	XLOC_035553:rgs-7	rgs-7	0.074	0.264	0.19	0.071866	F56B6.2a.1	j	X:3536402-3557599	+	4	3542539;3546491;3547821;3556431	3542550;3546497;3547830;3556440	11;6;9;9	ATAGTTTCACTCAGATG;TAGTTGCAGGAA;AAGATGCTTCAGGTT;AAGTTTTTTCAGCGG
TCONS_00021362	XLOC_008250	B0491.6	0.604	0.795	0.19	0.00314161	B0491.6a.1	=	II:11345942-11348248	-	1	11347716	11347722	6	TAGTTTCAGATG
TCONS_00023560	XLOC_009072	H05C05.1	0.091	0.281	0.189	0.010654	H05C05.1c.1	j	III:2910819-2960574	+	3	2946915;2957274;2958090	2947091;2957349;2958233	176;75;143	CTACCGTACTATTTTTAGCGGATTTTTTTTCACTTTATTTTCACCGGTTTTTCGCGATTTTTCACTCATTTTCCATCGATTTTTCGCGTTTTTTCGCGTTTTTTCACACATTTTTCACACATTTTTCATGAAAAATTCAATTTTCTCCATTATTTTTCTAATTTCAGACATTTTTACAGCGA;TAGAATTACTGTAGTTTTCGTGGTGGGACCCAATTTGGTGGCCCTGAAAAATTTCCAAAATTTCCAAAATTTTTGCAGAAT;TTCACGAAGTTTACCTTTGTTTCACAAATGCTAAATTTCTCTCGAGATTTTTGGAATTTTTTCGTACTTTTTTTTTTGGCAAAATCGAAATTTTGTCAAGAAAAAAAAATTAATTTTATGCCATTAAATTTGTT…
TCONS_00003820	XLOC_001466	Y52B11A.3	0.08	0.269	0.189	0.00237023	Y52B11A.3a.1	j	I:10964472-11004283	+	1	10976212	10976223	11	CAGACATCAATAAATAC
TCONS_00000161	XLOC_000053:Y65B4BL.1	Y65B4BL.1	0	0.189	0.189	0.013742	Y65B4BL.1.1	j	I:523724-533327	+	2	530969;531238	530971;531267	2;29	TCCAGAAA;TAGCAAGTTTTCCAATCCATCCCAAATTACAGGTC
TCONS_00075637	XLOC_034648	fbxa-106	0.544	0.733	0.189	0.0348841	Y59A8B.11b.1	=	V:18082405-18107578	-	1	18083471	18083647	176	ATCAAATATGTCCGAAAATTACCATTTGGTATCGGTCCTAACAAATCAGTATTTATACCAAAGTTGTTTCTTCGTCAATATTTTGAATTTAATTTAAAAACACATATATTATTCAATTTTCAATCTCACGTGAGAGAGTGTGAGAGAAAAAGAGGAATTTTGAAATAAATGAAATTGAGAGA
TCONS_00035446	XLOC_013653	sams-3	0.72	0.907	0.188	0.000325505	C06E7.1a.1	=	IV:5848169-5859976	+	1	5849225	5849318	93	CAGGCTCTACGGGTGTTGGATGATGCGGGAAACGGGGCTGAAGCTTATCGCAACAATATGTTTCTTTACCTGTTACAACGGTTACTTTGATTACAGAAA
TCONS_00021146	XLOC_008163	F44F4.3	0.004	0.191	0.187	0.000227749	F44F4.3.1	=	II:10884704-10887996	-	1	10885252	10885254	2	TTCAGTTT
TCONS_00079489	XLOC_036328	C44E12.1	0.007	0.193	0.186	0.00883354	C44E12.1.1	j	X:7595860-7599824	+	1	7596926	7596927	1	GCAGCAT
TCONS_00087336	XLOC_039636	moc-1	0.775	0.961	0.186	0.012851	T06H11.4.1	j	X:10136128-10138775	-	1	10138620	10138622	2	TGCAGAAA
TCONS_00079780	XLOC_036481:kin-9	kin-9	0	0.185	0.185	0.0958005	F08F1.1b.1	j	X:8417341-8455835	+	1	8436227	8436232	5	TAGTTTAGGAG
TCONS_00031720	XLOC_011971:epg-6	epg-6	0.125	0.31	0.184	0.0466584	Y39A1A.1b.1	j	III:10589804-10604919	-	2	10597126;10599653	10597132;10599656	6;3	AAGTTCCAGAAA;CAGAAGAAA
TCONS_00074410	XLOC_034015	ZC412.3	0.017	0.2	0.184	0.00196201	ZC412.3a.1	=	V:14868621-14871547	-	1	14870612	14870613	1	CCAGGTG
TCONS_00004916	XLOC_001954	F49B2.6	0	0.183	0.183	0.006912	F49B2.6.1	j	I:14330963-14339838	+	1	14332834	14332840	6	CAGTGCACCAAC
TCONS_00030830	XLOC_011621	ess-2	0.417	0.6	0.183	0.0394604	F42H10.7b.1	j	III:8478381-8491097	-	1	8488813	8488819	6	AAGTTTCAGCCG
TCONS_00083791	XLOC_038170:zfp-3	zfp-3	0.068	0.251	0.183	0.0908139	W05H7.4b.1	=	X:1439260-1448276	-	1	1442626	1442635	9	AAGTATTTTCAGAAG
TCONS_00080166	XLOC_036645:tmc-2	tmc-2	0	0.182	0.181	0.00135316	B0416.1a.1	j	X:9298345-9310601	+	2	9309735;9310040	9309736;9310052	1;12	TCAGCTA;CAGACTCCTCGACCACCT
TCONS_00014505	XLOC_005543:ZK1067.2	ZK1067.2	0.077	0.257	0.18	0.0456644	ZK1067.2b.1	j	II:9210218-9223152	+	1	9215213	9215217	4	CAGACCAATT
TCONS_00063214	XLOC_028844:C37C3.18	C37C3.18	0.744	0.923	0.179	0.000372775	C37C3.18a.1	=	V:7854229-7859909	+	1	7855944	7855954	10	TAGCAAATTCCAGAAG
TCONS_00072360	XLOC_033115	sqv-4	0.091	0.27	0.179	0.0987137	F29F11.1.1	j	V:10658193-10671376	-	1	10661467	10661489	22	CATTTTAAATATTTTCAAATTTCAGTAA
TCONS_00010684	XLOC_004000:chs-2	chs-2	0	0.178	0.178	0.0516941	F48A11.1b.1	=	II:162198-211941	+	1	210668	210669	1	TCAGGAC
TCONS_00087139	XLOC_039569	F34H10.3	0.026	0.204	0.178	0.0315584	F34H10.3.3	=	X:9633283-9643159	-	1	9635025	9635046	21	CAGCCCAAGTTTTCTTGATTTCAGATG
TCONS_00072336	XLOC_033106	H09F14.1	0	0.178	0.178	0.0510293	H09F14.1b.1	j	V:10612702-10622335	-	1	10615589	10615596	7	TTTGTTTCAGATG
TCONS_00024776	XLOC_009512	cyk-3	0.568	0.745	0.177	0.0125163	ZK328.1a.1	=	III:6020164-6024659	+	1	6022333	6022342	9	AAGATTCTTCAGGTC
TCONS_00008644	XLOC_003281	drsh-1	0.094	0.271	0.177	0.00914004	F26E4.10b.1	=	I:9780286-9785722	-	2	9781509;9782822	9781518;9782828	9;6	AAGTGGTTTCAGAAC;TAGTTGCAGGAA
TCONS_00019398	XLOC_007507	clhm-1	0	0.176	0.176	0.0466584	C44B7.4.1	j	II:6868945-6871185	-	1	6869983	6869985	2	TACAGTAC
TCONS_00018492	XLOC_007100	nep-12	0	0.176	0.176	0.0149647	F26G1.6.1	j	II:4774381-4784825	-	6	4776217;4776373;4776548;4776987;4779430;4779646	4776218;4776374;4776549;4776988;4779431;4779647	1;1;1;1;1;1	TCAGTCT;TCAGGGA;TAAGATT;TTAGGAT;CCAGGCT;GCAGGAA
TCONS_00029643	XLOC_011166	skpt-1	0.13	0.305	0.175	0.0509417	F48E8.7b.1	=	III:5282444-5467992	-	1	5448112	5448121	9	AAGTATTCTCAGATG
TCONS_00053115	XLOC_023089	K10D11.3	0	0.175	0.175	0.0205808	K10D11.3b.1	j	IV:12982118-12986099	-	2	12982803;12985792	12982804;12985948	1;156	TCAGCTC;CAGTATGCCCCACCCAAGACACCCAATTTCCAACTAAAAATAATAATTCTTCAACTGATCAATACAATCCCTATTACTATCCATATCCTTGGTGGCCAAATTCCTATATTCCACGTTACAAGTCAAATCAGTTTTGTAAATGGACTGTCGTAATTCCAGACC
TCONS_00018538	XLOC_007128	R05F9.9	0.65	0.823	0.173	0.0922257	R05F9.9.1	=	II:4899858-4902159	-	1	4901973	4901983	10	AAGTTATTTTCAGATG
TCONS_00033196	XLOC_012521	egl-4	0.248	0.42	0.172	0.0636392	F55A8.2a.1	=	IV:1847967-1880587	+	2	1862678;1875642	1862683;1875651	5;9	GTTTTCAGAGA;AAGTGTTTACAGGGT
TCONS_00013611	XLOC_005165	ZK1127.3	0.285	0.456	0.172	0.070819	ZK1127.3.1	j	II:7055284-7058014	+	1	7055926	7055933	7	TAGCTTTCAGATA
TCONS_00086926	XLOC_039457:sec-15	sec-15	0.084	0.256	0.172	0.00971183	C28G1.3.1	j	X:8829919-8835942	-	1	8833755	8833761	6	AAGCTTCAGGGA
TCONS_00071358	XLOC_032692	F52E1.9	0.384	0.556	0.172	0.0689722	F52E1.9b.1	=	V:8397644-8402669	-	2	8399063;8399348	8399064;8399373	1;25	TCAGGTC;TACATATCAATCCTTTCGTTTTTTGTAGATA
TCONS_00063632	XLOC_029029:unc-23	unc-23	0.081	0.252	0.171	0.00152045	H14N18.1a.1	=	V:8932617-8944063	+	1	8937215	8937403	188	AAATTCGAAAAATACAGTTTCGAAATCGATTTTCATTTGCCTCTGCTGAAATATGATTGAAAAACGAGAAAAAAGTGGGAGGAGTCACTCTTATCAAACAGAAACACAAGAGACACTAACCAACTCACTCATTCTTATCTTTTTTGATTCTAACTTTCATTTCTACCATCCTAATATTCAGCATGTTTCAGAAC
TCONS_00029633	XLOC_011164	W03A5.6	0.002	0.173	0.171	9.13348e-14	W03A5.6b.1	j	III:5282444-5467992	-	3	5434249;5440211;5440360	5434467;5440215;5440362	218;4;2	TGTTTTTTATTGCTCCAGTTCTGATTTGATCATTCAAACATTTTTGGGCACAACCTAGCTCAAAATGTATGATCTCCAATATACTATTTTTCAGTCTAATTAATTTTGGCACACATGCTGATTTTTGGCTATTTTTACAAGTAAAAAAAGAAGGAACTAGTGATTTTTTTAAATTTGTTTTTTTTATTACCTTTCCTAAAATTATCCTTGATTTATTATAGCTC;AAGTTTCAGA;TTCAGAAA
TCONS_00039163	XLOC_015376	mbk-2	0.016	0.186	0.17	8.75324e-05	F49E11.1g.1	j	IV:13009115-13035955	+	1	13023834	13023838	4	CAGGATCATA
TCONS_00027746	XLOC_010557	attf-3	0.477	0.647	0.17	0.0246096	F54C4.3.1	=	III:69914-89243	-	1	85165	85174	9	CAGTTTTTCCAGAAA
TCONS_00072887	XLOC_033384	sipa-1	0.02	0.19	0.17	0.00185645	T27F2.2d.1	=	V:11631433-11637291	-	1	11632461	11632467	6	TAGATTCAGATC
TCONS_00017151	XLOC_006593	lips-14	0.001	0.17	0.169	0.000244515	H17B01.3	j	II:1484093-1486704	-	2	1484201;1485764	1484202;1485911	1;147	TCAGCGT;GAGTTTTCATTGATCTGAAATTCAATATAAATGCATTGGCCGATTTCGATTTCACGTTTATATTTAAAGCCATATGAGCCTTTCGATTTAATTACCTACAGTTTTTTTTTTCAAATTTTTCAACTTTTAAAGTAATAGTGAGTATTTCAGGTT
TCONS_00031903	XLOC_012046	obr-1	0.522	0.691	0.169	0.00847887	Y47D3A.17e.1	=	III:11257306-11276090	-	1	11266346	11266348	2	TCCAGACA
TCONS_00012348	XLOC_004640:C16A11.10	C16A11.10	0.602	0.77	0.168	0.0501473	C16A11.10.1	j	II:4226581-4234620	+	1	4228960	4229547	587	CAGAAAATTCCATTCAAAGAGTTGAGCCGTGCCTTCCGAACTGCAATCTCCCTGGTTTCTCAATGAGAAAATATTTGTTTTTAATTGTTTCTTTTTAATTATCCACATGTTCTATTGATTCCCCCGTGTTTATTTTAATTATCTGCACTTTTAATTTTATCTCTAAGTATTATTTTTTGTCGATAAATACCGTTGATGTTTAATTATTTTAATATTATGTTTTCTTTGTATTCAAATTCAGAAATTGTTTGATCATTTCTCTATATCTTCTTCTTTTTTTCAACGTTTTAATAGCTAAAAATTAACAAAATTTATTGGTGATGATTAATAACCTTTTCGCGTCGAGACCCAAGCCTTAATACCAGCCATGCGCCTTTAAACAAGTTACGGTGCCTCCAC…
TCONS_00067851	XLOC_031072:nceh-1	nceh-1	0.01	0.178	0.168	6.51751e-05	Y43F8A.3a.1	j	V:19371434-19381031	+	1	19377444	19377446	2	TTCAGCGC
TCONS_00051069	XLOC_022291	tag-77	0.003	0.171	0.168	0.000145926	C28C12.10c.1	=	IV:8503492-8510559	-	2	8503971;8507331	8503977;8507332	6;1	AAGTTTCAGAAG;TCAGCTT
TCONS_00021689	XLOC_008367	pqn-87	0.015	0.183	0.168	0.0140846	Y57A10A.18e.1	j	II:12203308-12225086	-	4	12209830;12214956;12215766;12221789	12209839;12214968;12215775;12221791	9;12;9;2	AAGGTCCTCCAGGTT;AAGGTTTTCTTTAAGCAT;CAGAGTTTCCAGGGC;TCCAGTAA
TCONS_00002038	XLOC_000737:C10G11.6	C10G11.6	0.582	0.747	0.166	0.017709	C10G11.6b.1	j	I:6284012-6297625	+	1	6288925	6288927	2	CAGCACTA
TCONS_00005703	XLOC_002218:F23C8.5	F23C8.5	0.251	0.417	0.166	0.010862	F23C8.5a.2	j	I:2415132-2421816	-	1	2418848	2418849	1	CCAGGTC
TCONS_00032533	XLOC_012270	T05D4.3	0	0.166	0.166	0.0646178	T05D4.3.1	j	III:13566135-13583591	-	1	13567141	13567146	5	CAGAATAGTCC
TCONS_00034829	XLOC_013289	F41H10.3	0.369	0.533	0.164	0.0577512	F41H10.3a.1	=	IV:5261912-5398591	+	1	5372674	5372686	12	CAGCCGAACTTTCAGATA
TCONS_00053178	XLOC_023113:C48D1.1	C48D1.1	0.011	0.175	0.164	0.0167886	C48D1.1a.1	j	IV:13187953-13198090	-	1	13196682	13196718	36	AGAAAAATCAATTTCTGTAATAATCCCTCAATTTTTTAGAAG
TCONS_00031526	XLOC_011898	T16G12.1	0.039	0.203	0.164	0.0775779	T16G12.1.1	j	III:10040180-10050125	-	4	10040664;10042359;10043075;10044490	10040665;10042363;10043076;10044503	1;4;1;13	TCAGAAT;TTTTCAGGCT;TCAGATG;AAGTTCTGTATTTCAGTTT
TCONS_00026263	XLOC_010073:cbp-1	cbp-1	0.074	0.237	0.163	0.000443506	R10E11.1a.1	=	III:9757615-9774857	+	2	9768412;9768680	9768421;9768713	9;33	CAGCTTTTACAGGAA;CAGCCGATACCACACAAACTACAAAAAAATGTTCAGTCG
TCONS_00085598	XLOC_038927	ptr-4	0.082	0.245	0.163	0.0531364	C45B2.7.1	j	X:6060753-6065992	-	3	6062135;6063454;6064312	6062141;6063456;6064313	6;2;1	TCAGATAAGTAT;TTCAGATC;ACAGTTC
TCONS_00073101	XLOC_033485:clh-6	clh-6	0.351	0.514	0.163	0.0744015	R07B7.1.1	j	V:12056574-12065462	-	1	12063283	12063312	29	TCACTTGACTTCTCGGAAATAATATTTTTCAGTCT
TCONS_00000740	XLOC_000227	zwl-1	0.237	0.398	0.161	0.0826762	Y39G10AR.2b.1	=	I:2375225-2409987	+	2	2406296;2407816	2406327;2407822	31;6	TCCCGAGTTTTCCTCAAATTTGCCCATTTTTCAGAGT;AAGTTTCAGAGG
TCONS_00051031	XLOC_022277:M116.5	M116.5	0.188	0.349	0.161	0.0320409	M116.5.1	j	IV:8387625-8421618	-	2	8417798;8420473	8417800;8420475	2;2	TTCAGTTG;TTCAGACG
TCONS_00029141	XLOC_010984:nhr-20	nhr-20	0.541	0.701	0.16	0.0667207	F43C1.4.1	j	III:4230435-4247792	-	2	4233219;4246959	4233220;4246961	1;2	TCAGCTG;TTCAGTGT
TCONS_00023895	XLOC_009213:unc-79	unc-79	0	0.159	0.159	0.000102935	E03A3.6a.1	j	III:4066501-4083109	+	1	4078441	4078654	213	TGAATAATGCTCGGGTTTCGATTAGTTTTAAAATTGAAAACCCATTTGAGATATTTTCAATTGTCTAAAACATTTTGCTGAAGTTTGTTTCAACGCATTTTTAAATTCTTAAAATTTTTTAAATAAAACATTTTTTGTGCCCCCCTTCCGTCTGGTACGTGTTCAAGTTCCAATCTTAAAACAACCCATTATTATTCCTAATCAAAACTGTTTCAGGAG
TCONS_00058682	XLOC_026487:gln-3	gln-3	0.052	0.211	0.159	0.0171699	Y105C5B.28a.1	=	IV:16167742-16170859	-	1	16169129	16169130	1	CCAGCCA
TCONS_00037904	XLOC_014833	T04B2.3	0.052	0.21	0.158	0.0735832	T04B2.3a.1	j	IV:10047357-10050554	+	1	10048602	10048609	7	TCCATTACAGCAG
TCONS_00078375	XLOC_035811	lfi-1	0.151	0.309	0.158	0.048509	ZC8.4a.1	j	X:4972569-4997976	+	1	4984775	4984790	15	AAGGGATGAGTACTCCAGGGA
TCONS_00083608	XLOC_038097	igcm-1	0	0.158	0.158	0.000145799	F39H12.4.1	j	X:845730-851614	-	3	847131;847491;849766	847132;847493;849767	1;2;1	TCAGCCA;CGCAGATC;TCAGTTT
TCONS_00029604	XLOC_011161	Y32H12A.8	0	0.159	0.158	3.27273e-11	Y32H12A.8.2	j	III:5282444-5467992	-	3	5387651;5402117;5404836	5387657;5402122;5404848	6;5;12	AAATTGCAGTGG;AATTACAGATT;CAGTCTCATTTCAAGGAT
TCONS_00031239	XLOC_011787	F54C8.6	0.025	0.181	0.157	0.0549332	F54C8.6b.1	j	III:9443837-9449931	-	1	9446604	9446606	2	TTCAGTTT
TCONS_00067762	XLOC_031036	tsp-13	0.844	0.999	0.156	0.0407285	Y39B6A.6.1	j	V:19152986-19158877	+	1	19154106	19154115	9	TCAAAGTTTCAGATA
TCONS_00082130	XLOC_037498	T24C2.5	0.001	0.156	0.155	0.0342926	T24C2.5.1	j	X:14534201-14539528	+	1	14537897	14537899	2	TTCAGCAC
TCONS_00083387	XLOC_038031	C04E7.3	0	0.153	0.153	4.95892e-08	C04E7.3.1	j	X:334800-349539	-	1	337532	337681	149	AAGGGAGATACTGTGAACAATCTCAATACTTGTATGCTCCAGCCGCACCCGTCCCCTACCGCAAAAAGGCATGAAAATCCGAGGTCACCGGTTTTTAAAGTTCCAAGAAAATTTGTTTCAAAACGCGAAAATATTCAAGCACTAATATTGAGAAA
TCONS_00084009	XLOC_038267	swip-10	0.678	0.831	0.153	0.0764552	F53B1.6.1	j	X:2114403-2121061	-	2	2115285;2117233	2115286;2117236	1;3	TCAGCAT;TTACAGAAC
TCONS_00024293	XLOC_009357	eri-9	0.001	0.153	0.152	8.65934e-17	C26E6.7a.2	=	III:4847008-4947317	+	1	4933376	4933382	6	AAGTTTCAGAGA
TCONS_00076691	XLOC_035037	ipla-3	0.22	0.372	0.152	0.0269012	W07A8.2c.1	j	V:20717871-20729271	-	2	20727305;20728748	20727311;20728754	6;6	TAGTCTCAGAGC;TTCGTTTAGATT
TCONS_00003396	XLOC_001299:strl-1	strl-1	0.237	0.388	0.151	0.0707403	F52F12.7a.1	=	I:9925977-9930885	+	1	9929714	9929727	13	TCTTTTAATGTTTCAGTTA
TCONS_00019453	XLOC_007533	sod-1	0.208	0.358	0.151	0.0499686	C15F1.7a.1	=	II:6970667-6988629	-	1	6973501	6973514	13	TTCGTTGAATTTACAGGTC
TCONS_00031298	XLOC_011807:acox-1.5	acox-1.5	0.035	0.186	0.151	8.52467e-08	C48B4.1.1	j	III:9568750-9595810	-	1	9587171	9587172	1	TCAGGCT
TCONS_00020851	XLOC_008050:let-268	let-268	0.005	0.156	0.151	0.00107773	F52H3.1.3	=	II:10026594-10039980	-	1	10038120	10038122	2	TTCAGAAA
TCONS_00072690	XLOC_033282	dvc-1	0.601	0.752	0.15	0.0510293	T19B10.6.2	=	V:11237437-11239349	-	1	11238959	11238971	12	GATAAAAGTTTACAGTAT
TCONS_00002335	XLOC_000857	plin-1	0.142	0.291	0.149	0.0735832	W01A8.1a.1	=	I:7057169-7059351	+	1	7057991	7058000	9	TAGCTTTTTAAGGCA
TCONS_00032277	XLOC_012173	aakg-1	0.029	0.178	0.149	0.00293386	Y111B2A.8a.1	=	III:12537787-12575976	-	1	12540399	12540401	2	TTCAGTGG
TCONS_00051956	XLOC_022630	R11A8.1	0.201	0.349	0.148	0.0472985	R11A8.1.1	j	IV:10353166-10357186	-	1	10356732	10356734	2	TTCAGAGA
TCONS_00023901	XLOC_009213:unc-79	unc-79	0.008	0.154	0.146	0.0140846	E03A3.6b.1	=	III:4066501-4083109	+	2	4078441;4079808	4078654;4079840	213;32	TGAATAATGCTCGGGTTTCGATTAGTTTTAAAATTGAAAACCCATTTGAGATATTTTCAATTGTCTAAAACATTTTGCTGAAGTTTGTTTCAACGCATTTTTAAATTCTTAAAATTTTTTAAATAAAACATTTTTTGTGCCCCCCTTCCGTCTGGTACGTGTTCAAGTTCCAATCTTAAAACAACCCATTATTATTCCTAATCAAAACTGTTTCAGGAG;GAGTTCACTGGAGTTCACTAAACTTAAAATTTAAGTTG
TCONS_00081664	XLOC_037277	sir-2.2	0	0.145	0.145	4.6851e-07	F46G10.7a.1	=	X:13328160-13331250	+	1	13329434	13329440	6	TAGTTCCAGGTA
TCONS_00016890	XLOC_006496	acdh-9	0.088	0.233	0.145	0.0119518	F28A10.6.1	j	II:846253-848686	-	1	847580	847581	1	CCAGGTA
TCONS_00008008	XLOC_003067	rskn-1	0.312	0.458	0.145	0.0850058	T01H8.1a.1	=	I:8549512-8590429	-	2	8574339;8574575	8574345;8574581	6;6	AAGTTGCAGAAC;CAGTTTCAGGTT
TCONS_00064732	XLOC_029565	C55A6.10	0	0.143	0.143	5.73937e-14	C55A6.10a.1	=	V:11505241-11508271	+	2	11505820;11506871	11505827;11506877	7;6	CAGTTTTCAGTTT;AAGCTATAGGAT
TCONS_00084837	XLOC_038606	nck-1	0.001	0.144	0.143	0.0471861	ZK470.5a.1	j	X:4148647-4160292	-	1	4150757	4150762	5	TTTTTCAGGAG
TCONS_00037622	XLOC_014703	daf-15	0.199	0.341	0.142	0.0516226	C10C5.6c.1	=	IV:9386003-9394930	+	2	9387257;9391269	9387266;9391287	9;18	AAGGAGTTACAGAAC;AAGTTGTCGAAATGATTCCAGAGT
TCONS_00078922	XLOC_036058:T13C5.3	T13C5.3	0	0.141	0.141	0.0428458	T13C5.3.1	j	X:6177506-6181472	+	1	6178343	6178400	57	AAGAGAATTGTGTGTCACCTTAAAGAATTTAAAATTAACCCATTTATTACATGATTGGAGGAA
TCONS_00087665	XLOC_039755	T21B6.3	0.859	1	0.141	0.00105522	T21B6.3.1	=	X:10945159-10948970	-	1	10947905	10947907	2	TTCAGTGG
TCONS_00051832	XLOC_022598	pxf-1	0.128	0.268	0.14	0.0163974	T14G10.2b.2	j	IV:10162007-10176484	-	1	10174339	10174341	2	TATAGGAG
TCONS_00006055	XLOC_002322	cdap-2	0	0.14	0.14	3.56848e-05	Y44E3A.4.1	j	I:3318848-3340227	-	1	3330673	3330674	1	CCAGAAT
TCONS_00013954	XLOC_005320:ptc-1	ptc-1	0.123	0.261	0.138	0.0492396	ZK675.1a.2	j	II:7884402-7928700	+	1	7893530	7893539	9	CAGTCATTTCAGTTT
TCONS_00025526	XLOC_009780	npp-15	0.08	0.217	0.137	0.0767229	C29E4.4.1	j	III:7929012-7932993	+	1	7929179	7929194	15	TAGATTGGCACGCTTCAGCTC
TCONS_00006082	XLOC_002327	W05F2.4	0.014	0.151	0.137	5.00658e-08	W05F2.4a.1	j	I:3374558-3407865	-	6	3380306;3395956;3396787;3400372;3402591;3402749	3380307;3395958;3396789;3400386;3402592;3402750	1;2;2;14;1;1	TCAGCCA;TTCAGAGA;TTCAGGTG;TATACAACCATTTTCAGTCT;TCAGCTG;TCAGATG
TCONS_00005633	XLOC_002191	fpn-1.1	0.856	0.993	0.137	0.00095599	Y37E3.16.2	=	I:2096650-2145971	-	1	2115609	2115610	1	CCAGGAA
TCONS_00036706	XLOC_014382	unc-82	0	0.136	0.136	2.53562e-07	B0496.3e.1	j	IV:7424497-7445504	+	4	7428926;7437441;7440203;7443007	7428934;7437479;7440282;7443052	8;38;79;45	CAGGTGGACGAATG;ATTGATATTTTAGATTTAGAACTAACCGGCTTTTGATTTAGGCA;TATGTATATTTTAACGATTTCTGTGGAATAAATTCACCCGGTCCTCTATTTGCTCCCCCGTGGCCACAAATTATTTTTCCAGACA;CAGCATGAATTTCTTGATCAACTTCTAAGCATGCGTTTCATTCTCCAGGTG
TCONS_00038587	XLOC_015142	alg-3	0	0.135	0.135	0.0290166	T22B3.2b.1	j	IV:11704245-11708528	+	1	11704694	11704703	9	CAGGGATCTCAGGAT
TCONS_00018434	XLOC_007078	che-10	0.016	0.151	0.135	0.0107271	F35D11.11b.1	j	II:4627810-4639913	-	2	4629618;4635479	4629619;4635480	1;1	GCAGCTC;GCAGTCA
TCONS_00017538	XLOC_006721:K09F6.6	K09F6.6	0	0.135	0.135	4.23452e-12	K09F6.6.1	j	II:2254751-2308361	-	5	2276281;2277471;2279155;2291299;2291591	2276282;2277472;2288061;2291300;2291601	1;1;8906;1;10	TCAGATC;TCAGGAC;CAGAAATGTCTGGATCACCGAAAAGGAAAACAACTACAACTTGCAAAGAGTTTGGCAACATCTGTTGGGCTGGATTGCGACCGCGAAGAACATGGATTCGATGATTTACAGAAAATTGCAGACCATCTGCATAACATTTGTGTGTGGGGGCTGAAAAGCGGTTCAAAGGCTACGGCGAAAATTTTTGAAGCAAATAAAGGTGCAAAAGGATTCATTCCACTTCTGTATGTCGACAACCACTTTGATTTTTTTGTACCGAGGATTGATTACGTCAATACCGGATTTTGTTTCAAATGTAATCAATACTCTGGTCGCCGACATTACCAAACATGCGGGGCCAAATGTCGGAGATGTGGTGTCACCAATTGCGAGAAGAATGGAGT…
TCONS_00018697	XLOC_007197	pmt-1	0.006	0.14	0.135	4.78365e-10	ZK622.3b.1	=	II:5278136-5288991	-	1	5280279	5280455	176	CATTTTTTTTGCTTATACGGTGTGCGTGTTTCTGTTTTCCCATACCAAATCGTCTCCTCGTAGTCTCATTATGTCGCCGAGCTTGTTTGCTTTGGTGACCAGGAGAAAAACAAGTGCAAACATACTGTCATTGTTCAAAAGGAACCGGCAAGGCTGCTCAATTTTATCATTATTTTCAGAGC
TCONS_00014559	XLOC_005564	mel-11	0.103	0.237	0.134	0.00404561	C06C3.1a.1	=	II:9357907-9369098	+	1	9363210	9363219	9	TAGCGTTTTAAGGAA
TCONS_00079875	XLOC_036530:rig-1	rig-1	0	0.134	0.134	0.0175489	K09E2.4a.1	j	X:8647974-8681738	+	1	8661276	8661278	2	TTCAGAGG
TCONS_00051405	XLOC_022419	pezo-1	0.033	0.168	0.134	0.0637827	C10C5.1b.1	=	IV:9343357-9376886	-	2	9361965;9363968	9361971;9363974	6;6	AAGTTTCAGGAT;AAGCTACAGCAC
TCONS_00008353	XLOC_003166	F36H2.3	0.008	0.14	0.132	0.000465882	F36H2.3h.1	j	I:9250658-9261880	-	3	9255766;9257134;9258996	9255767;9257136;9258997	1;2;1	TCAGGAA;TTAAGATC;TCAGTCG
TCONS_00017537	XLOC_006721:K09F6.6	K09F6.6	0.002	0.134	0.132	8.64831e-11	K09F6.6.1	j	II:2254751-2308361	-	4	2276281;2277471;2291299;2291591	2276282;2277472;2291300;2291601	1;1;1;10	TCAGATC;TCAGGAC;TCAGATA;TAGTTATTTGAAGGAA
TCONS_00013790	XLOC_005243:ZK1290.13	ZK1290.13	0.012	0.142	0.13	0.00644324	ZK1290.13.1	j	II:7534793-7543000	+	1	7536284	7536290	6	CAGCAATCAAAT
TCONS_00087495	XLOC_039701	F59F5.3	0.008	0.138	0.13	0.0738061	F59F5.3.1	j	X:10537140-10542423	-	2	10537897;10542162	10537898;10542163	1;1	TCAGATT;TCAGAAA
TCONS_00021761	XLOC_008404	daf-22	0.038	0.168	0.13	0.0422296	Y57A10C.6.1	=	II:12423513-12425832	-	1	12425105	12425107	2	CCCAGGAA
TCONS_00011095	XLOC_004143	F53A10.2	0	0.129	0.129	1.44746e-05	F53A10.2a.1	j	II:1175951-1230782	+	2	1211077;1227917	1211082;1228270	5;353	CAGACGCAATT;ATTACTTTTTATAAGCTCAGCACCATACAAAAATAGGCGTGGTTTGATAAACCCCGCCCACAAAATGGCCTAGATTTTGTTATTTTTTACGAATAATTTGAAAACATAATTTCAAGCTAAAATTTTCAAAAATTTTTCATATTTTTTTAATCAAAATTTTGCTAATAACGAGTAAACTATTTAATTTGAAATTTACAAAAAGGGAGTCGAATAAGGCTCCGCCCACAAAATGGCTCTTTTTTCCAGAACATTTTTTATAAATTTTTTGTCAAAAAAAAAAGCATATTTTGCTGTCACTTAGGCCCCACCCACAAAATGGACATGACGAAAAAATCTATAATTTTTCTAAATTTCAGAAA
TCONS_00015743	XLOC_006080:Y46G5A.34	Y46G5A.34	0	0.128	0.128	0.0273804	Y46G5A.34.1	j	II:12760796-12781723	+	1	12781185	12781192	7	TCCAGGATACGCT
TCONS_00008301	XLOC_003161	lim-9	0.011	0.14	0.128	0.00426616	F25H5.1i.1	=	I:9181810-9220766	-	1	9210337	9210347	10	AAGACATTTTCAGATG
TCONS_00018337	XLOC_007034	mth-1	0.064	0.192	0.128	0.0380601	F31D5.5.1	j	II:4186665-4208499	-	2	4197267;4197668	4197274;4197669	7;1	AAGCTTCCAGAGC;TTAGAAC
TCONS_00011988	XLOC_004516:C16C8.14	C16C8.14	0.317	0.445	0.127	0.0503219	C16C8.14.2	j	II:3440815-3454688	+	1	3450182	3450190	8	CAGATTTAAAAATG
TCONS_00024126	XLOC_009288:wdr-48	wdr-48	0.123	0.248	0.125	0.00468674	F35G12.4a.1	=	III:4578852-4583893	+	1	4580831	4580840	9	AAGAAATTATAGTGA
TCONS_00029821	XLOC_011234	dpff-1	0.024	0.149	0.125	2.15332e-05	C28H8.9a.1	j	III:5903551-5917585	-	2	5905602;5905906	5905614;5905912	12;6	TAGTTCGATTTGCAGAAA;AAGTTGCAGACT
TCONS_00020452	XLOC_007877:T24B8.4	T24B8.4	0.017	0.142	0.125	7.1715e-07	T24B8.4a.1	j	II:9062271-9080230	-	1	9064274	9064461	187	AATGTTTTTAGGGTTACCTTTGAGGCATATTGTGCCTTTTTACTGACTCTATGAAAGACTAGTATATTTAAAAATTTATACAATCTAAGTACACATCAATTTTTACAACATGCATGTATGATCCAACTCCATAAATTTCCAGATTTCTCTTGTTTCTGAGACTTTTCATTTTTAAATCTTAATATTTCAGATC
TCONS_00014696	XLOC_005620	nos-3	0	0.124	0.124	0.0184968	Y53C12B.3a.1	j	II:9721010-9768271	+	2	9746715;9749849	9746717;9749856	2;7	TACAGTCA;AAGTTTCCAGAAT
TCONS_00022882	XLOC_008838:zip-2	zip-2	0	0.123	0.123	2.68927e-14	K02F3.4.2	j	III:832976-835808	+	1	833858	834088	230	GTCTTGTCGACCCCCGTCGTCTGTCTCCGACTGGGTGACATCATGTGAAATCTTGCCAAATGTTGTGCAATAGTGGGTGGAGCGTCCGCTCTAACGTGGTTTTTGGGTTTTCTCTGCCTCATTCTTTCGTTTTGACAAATTGTCCATTGGTGACTTTTTGTTTTTTTTTTCTATTTTGCTTACGGGAATCGATTGTTTTGACATGCTTTTGCCTAAACGGTGGTATTTTTCAGCAA
TCONS_00000400	XLOC_000131	Y92H12BR.7	0.005	0.128	0.123	0.000774054	Y92H12BR.7.1	o	I:1376941-1405534	+	1	1402092	1402097	5	CAGACGACAAT
TCONS_00069958	XLOC_032020	C37H5.13	0.016	0.138	0.122	0.000177785	C37H5.13a.1	j	V:4851471-4862965	-	1	4859453	4859455	2	TGCAGCGC
TCONS_00020693	XLOC_008001:wee-1.3	wee-1.3	0.107	0.229	0.122	0.0216281	Y53C12A.1.1	j	II:9713736-9716782	-	1	9716467	9716552	85	ATTAATTTTGATAAAACATGTTATTTATTTTCTTTGACCTTCCTTCCTTCTTTTTTCCGCTGCGTATGATTAATTTATTCATTTTCAGTGA
TCONS_00086427	XLOC_039246	kvs-1	0.004	0.125	0.12	0.0836972	C53C9.3b.1	j	X:7690507-7713655	-	4	7691835;7693122;7694433;7694565	7691836;7693123;7694434;7694566	1;1;1;1	TCAGCTG;TCAGTGG;GCAGATA;ACAGGAG
TCONS_00085256	XLOC_038776	ags-3	0.006	0.127	0.12	0.0354397	F32A6.4a.1	=	X:5289727-5306328	-	1	5290670	5290671	1	TCAGATG
TCONS_00076705	XLOC_035040	elp-1	0.036	0.156	0.12	0.0267257	F38A6.2a.2	j	V:20764091-20770163	-	2	20767691;20768984	20767693;20768985	2;1	TTCAGAGA;TCAGACG
TCONS_00076818	XLOC_035080:T08D2.7	T08D2.7	0.065	0.184	0.119	0.00236748	T08D2.7.1	j	X:149735-207948	+	1	202487	202533	46	CAGGTAGCGTGCACCTACGGAGGAGTTGGAATTTCCGAGCAAATTGCAGATT
TCONS_00005792	XLOC_002244	F32B5.7	0	0.119	0.119	0.000939367	F32B5.7a.2	j	I:2672939-2683011	-	6	2674464;2674886;2676748;2678055;2679328;2679890	2674466;2674887;2676749;2678056;2679346;2679891	2;1;1;1;18;1	TTCAGATG;TCAGTTC;CTAGGTC;TCAGGTT;GGTAGTTTTTTTTGTTTTCAGGAC;CCAGGCC
TCONS_00051499	XLOC_022462	lron-14	0.01	0.13	0.119	0.0561811	T05A1.3a.1	j	IV:9539879-9566650	-	2	9563078;9565235	9563113;9565243	35;8	TTTGAAACTTTTTTGGTTAACCCGGAACATTATTTCAGACA;CAGAAACAACAGCC
TCONS_00076018	XLOC_034813	nhr-95	0.029	0.147	0.118	0.0393954	Y39B6A.17a.1	j	V:19076562-19082795	-	2	19080124;19080865	19080125;19080866	1;1	CCAGATG;TCAGATT
TCONS_00064742	XLOC_029571	ccch-1	0	0.116	0.116	0.00621445	F38B7.1a.1	j	V:11527830-11541219	+	1	11536056	11536064	8	CAGAGTCTCTGCAG
TCONS_00006859	XLOC_002614	rpl-19	0.02	0.136	0.116	0.000252365	C09D4.5.2	=	I:5484778-5486354	-	1	5485742	5485756	14	ATATTAATTTTTTACAGGAA
TCONS_00033438	XLOC_012589:epg-9	epg-9	0.022	0.137	0.115	0.0226809	Y69A2AR.7c.2	=	IV:2600932-2613061	+	1	2603212	2603214	2	TTCAGTTC
TCONS_00077001	XLOC_035162	ZC13.1	0.836	0.951	0.115	0.00892636	ZC13.1b.2	=	X:877238-879881	+	1	877965	877971	6	TAGTTTCAGGAA
TCONS_00037364	XLOC_014626:cfim-2	cfim-2	0.052	0.166	0.114	0.0021247	D1046.1b.2	=	IV:8926192-8932791	+	1	8927918	8927924	6	TAGTTCTAGACC
TCONS_00002547	XLOC_000928	wdr-23	0.012	0.126	0.114	0.0417348	D2030.9a.1	j	I:7422586-7723116	+	1	7595737	7596507	770	TTGTGAGTGTTTGTGTGTCTCTCTAATATCATCATGTGTTTTATCGAATATTGATTTTTCGTTTCAATTCTTTCGGAGAACGAGTGAAAGACGCGTGAATTGTTTCGCTTTCTGCGTCTACACCGAGCCGGATGGGAAGCCCTGAGGTTCCCGTAAGGGTCAAAACGAACATTTATTCAATTAAATGATGATATTTAATATAGAATCAGTGCCTATTCATGTGAAAGTAGTTTGAGATTTCCAATCTTTTTATCTAATAACATTGTTTGTTAATTATGCAACTTCACAAAAGTCACGTTATCAGATGATCACGTGTTTTAGTGATGCATAAAGCAAAAAAAGAATTTATTGAATAGTTTTCTGAGCAGTTCGTTTAAAATTACTCTTATAATTAAGAAT…
TCONS_00018198	XLOC_006980:C46E10.8	C46E10.8	0	0.114	0.114	0.00273578	C46E10.8.1	j	II:3724224-3731939	-	4	3726892;3728283;3728469;3729530	3726897;3728284;3728470;3729531	5;1;1;1	GGTTTTAGATC;TCAGCTA;CCAGGTT;TCAGAGG
TCONS_00002943	XLOC_001094:gls-1	gls-1	0.196	0.309	0.113	0.0849822	C36B1.8b.1	j	I:8736211-8742548	+	1	8741189	8741198	9	AAGCTATTGCAGGAA
TCONS_00082536	XLOC_037702	K09E9.1	0.03	0.143	0.113	0.00260621	K09E9.1b.2	=	X:15620488-15627461	+	1	15622307	15622335	28	TTCACACGTGTATCTAAACATTTTTCTTTAGGAT
TCONS_00085847	XLOC_039033:F23G4.1	F23G4.1	0	0.113	0.113	0.0551642	F23G4.1.1	j	X:6599554-6606793	-	2	6599922;6603205	6599992;6603364	70;159	TAGTTAGTGTCCTGGTCATAATCATCTCAATTCTTTGCACATCACTTGAAACCGTTCAAATCTTTCTCAACAGCAA;GCAGCAAACAAGCCGGAAAACTTACCCAGTCGAGAACCGCATAAATCATTGATAATGACGGCAAAGAAGGGGAATAACTGATAGGAAACATTTCACACTCTCAAAACATTAACTATACCGTTTTGGATTTTAAAGTATAGAATGAAGATGTTTGTTTTGCAGAAT
TCONS_00024714	XLOC_009490	hpo-10	0	0.111	0.111	7.15145e-18	F01F1.1a.1	=	III:5879488-5882923	+	2	5879826;5881222	5879845;5881231	19;9	CAGTTCTTCTTTTTCTTTACAGAGA;AAGTATTTACAGGAA
TCONS_00031172	XLOC_011762	clip-1	0.017	0.128	0.111	0.0962787	M01A8.2a.1	=	III:9257258-9269081	-	2	9263109;9266074	9263110;9266082	1;8	GCAGACG;TAATATTTCAGCTA
TCONS_00006698	XLOC_002572	C32E12.4	0.004	0.114	0.11	0.000196528	C32E12.4.2	j	I:5230313-5242793	-	6	5232395;5236070;5237631;5239670;5240776;5241021	5232417;5236071;5237632;5239671;5240777;5241022	22;1;1;1;1;1	TGTCTCTTTACATTAATTCTTCCAGAAA;TCAGGGA;TCAGAAA;TCAGGCA;GCAGCCT;TCAGATA
TCONS_00061600	XLOC_028085	apx-1	0	0.109	0.109	1.86887e-06	K08D9.3a.1	j	V:3209920-3223218	+	4	3211680;3212253;3215251;3220711	3212092;3212269;3215252;3220717	412;16;1;6	CCAGAAAAAACCAAAAAAAAAAAAAAAAAAAACGGCAGCCCTGCTTCAGAAAAGTCAAAATTACGAGAAACACTCAAAAATCTGAGAATGCGTATTGCACAACATATTTGACGCGCAAAATATCTCGTAGCGAAAACTACAGTATCCCCCCTTTAAATTACTACTGTAGCGCCGCTGGTGTCGATTTACGGGCTTAATTTTGATATCCGATCAAAAATCGGGCTCGTAAATCGACACAAGCGCTACAGTAGTCATTAACAGGATTACTGTAGTTTTCGGTACGACGAGATATTTTGCGCGCGTCAAATATGTTGTGCAGTACGCATTCTCAAAATTTTATGTTACCGTAATAAACATTCTAGAACCGTTTTAAAATTTTCGCGTTGTAAAAATCTGGAA…
TCONS_00018655	XLOC_007182:crh-2	crh-2	0.088	0.196	0.108	0.0790678	C27D6.4b.1	j	II:5172750-5187824	-	3	5184104;5187396;5187569	5184114;5187407;5187571	10;11;2	AAGTATATTTCAGCAG;CAGCTTTATTTCAGATA;TGCAGTCT
TCONS_00021374	XLOC_008254	shn-1	0.017	0.125	0.108	5.87178e-05	C33B4.3c.1	j	II:11375607-11390998	-	3	11385931;11386216;11388102	11385932;11386217;11388103	1;1;1	TCAGATG;TCAGGTA;TCAGACA
TCONS_00017662	XLOC_006761:nep-18	nep-18	0	0.108	0.108	0.000768026	K02F6.9.1	j	II:2545857-2565209	-	4	2560335;2561214;2563509;2563837	2560336;2561228;2563510;2563849	1;14;1;12	TCAGCTT;GAGCTTGCCGACTATAGAAA;CCAGAAA;TAGGTCAAATTACAGTAA
TCONS_00016208	XLOC_006265	nurf-1	0.001	0.108	0.107	0.05612	F26H11.2i.1	=	II:14390717-14407905	+	2	14397085;14400792	14397091;14400798	6;6	CAGTTCCAGAAT;AAGTTCCAGGCT
TCONS_00089072	XLOC_040341	C44H4.4	0.008	0.115	0.107	0.0346412	C44H4.4.1	j	X:14568755-14591821	-	1	14589101	14589104	3	TTGCAGAAT
TCONS_00073776	XLOC_033779	avr-15	0.073	0.179	0.106	0.010862	R11G10.1a.1	=	V:13497689-13511718	-	1	13499568	13499573	5	AATTTCAGTTA
TCONS_00061074	XLOC_027841:F16B4.5	F16B4.5	0	0.105	0.105	0.00804568	F16B4.5b.1	j	V:1587205-1591767	+	2	1588107;1591377	1588434;1591476	327;99	TAATATTCGCACAATTTGATCGATTTAGCAGAAAATAAAAATAAAAAATTATGTTTCATTTCTCCAGTGTCCGTAAAAAATCCCCCATTCTACCATTTTCTTTATTATTCCCAATTGGTTTATTCTGTTTTAAACGGGTCCCATGCAGTCTAGACGACATCGGGCGCCCCGTGTATCTTTTTTATTTTCATTCCCCCCACCATTTTCCCCTAAACAAATTGTTTGGAGATCTACATGTAGTAGCGGAAATGTTTCGTCAAAATCAGGATATTTGTTCCTGAGAATATCTTTTAGCTGTTTTCCAAAGCTTAAAAATAGCTAGTATTTCAGCGA;AATTCTAGTTTTTTACAAATTTCAGGATACTATAAATTAACTAGTACGATTGAAACTTTCAATCA…
TCONS_00013917	XLOC_005303	cki-2	0	0.105	0.105	0.000236729	T05A6.2a.1	=	II:7813955-7820301	+	2	7816661;7816825	7816692;7816828	31;3	ACTATTTCAAATTCTCTTATCAAAATTATTTCAGAAA;TAGCAGGTT
TCONS_00075357	XLOC_034526	K10G4.3	0	0.105	0.105	0.0220281	K10G4.3.1	j	V:17262630-17268049	-	1	17264953	17264955	2	TTCAGATG
TCONS_00089809	XLOC_040688:F22H10.5	F22H10.5	0.037	0.139	0.103	0.0337911	F22H10.5	j	X:16681339-16688778	-	3	16685029;16686103;16686272	16685030;16686105;16686274	1;2;2	ATAGGAA;TTCAGACA;TTCAGGAA
TCONS_00082491	XLOC_037683	eat-20	0	0.101	0.101	1.35452e-05	H30A04.1a.1	j	X:15506036-15524020	+	1	15522926	15522932	6	CAGTTCCAGAAT
TCONS_00073683	XLOC_033750	uig-1	0.115	0.009	-0.106	0.0504545	F32F2.1g.1	=	V:13273083-13295978	-	1	13273763	13274251	488	TTTTTGAACACGTACTAACTTTTTGATTGTTTTATTGAAAAACACGAAATATTAATGAAAACTGATGTGTTCACAGTTATAACCGGATAATTTTAAAATGTGTTTAGCTCCCCTTTTTTGTAATGTGCAAGTATTTTCTGATATTTTTTGTAAACGAATCAACGGAAAAATCTATGCCATGTTAACAGCACGGTACATTAAAGTTAGAGTACATAGAATTAGAAAAAATAGAACATTTGATACTGAAGCTCGACGTTAAAGGGATGTAGTCTTTGGAATAATGTCTTGCAAAAACTCTGCAATTTAAAGAGTTTTAGTGGTTTTCAATTGTGATCGTATCTGAATAAGTACGGGAAATAAGAACCCGCCTCGAATGGTTTTTTAATATGAGTGGTCATG…
TCONS_00080190	XLOC_036652	C23F12.4	0.998	0.892	-0.107	0.000199175	C23F12.4.1	=	X:9387280-9389189	+	1	9387563	9387591	28	TAGAAGATATCTGTTGAAAACAATTTTCCAGGAC
TCONS_00035793	XLOC_013871	zen-4	0.12	0.013	-0.107	0.0648072	M03D4.1d.1	j	IV:6117750-6127302	+	1	6118219	6118221	2	TTCAGAAA
TCONS_00009145	XLOC_003478:rsr-1	rsr-1	0.108	0	-0.108	3.40329e-09	F28D9.1.2	=	I:11075757-11182462	-	1	11181798	11181824	26	AAGGTTATACAAATTGGCTTTTCTTCAAGATC
TCONS_00005277	XLOC_002079	hum-7	0.111	0.001	-0.11	8.16706e-07	F56A6.2a.1	=	I:585830-607603	-	4	588757;592692;601542;603474	588763;592693;601543;603475	6;1;1;1	GAGTTTCAGATG;CCAGGAT;TCAGGCC;TCAGAAA
TCONS_00085055	XLOC_038699	K02G10.5	0.111	0	-0.111	0.0526715	K02G10.5d.1	j	X:4684877-4691718	-	2	4689238;4689995	4689239;4689996	1;1	TCAGCCT;TAAGAAT
TCONS_00024700	XLOC_009484	alh-9	0.129	0.016	-0.113	0.00571358	F01F1.6.2	j	III:5856017-5859189	+	1	5857209	5857210	1	CAGATGA
TCONS_00005356	XLOC_002105	pde-6	0.15	0.034	-0.115	0.00621445	Y95B8A.10a.1	j	I:872310-882713	-	2	874742;877914	874743;877915	1;1	CCAGACT;TCAGACG
TCONS_00017409	XLOC_006685:bath-20	bath-20	0.124	0.008	-0.116	0.0255612	B0047.1a.1	j	II:2039819-2044183	-	2	2040997;2041629	2040998;2041630	1;1	TCAGCTG;ACAGGAG
TCONS_00006910	XLOC_002627	pqn-52	0.148	0.032	-0.116	0.012821	M01E11.4c.1	j	I:5566342-5571688	-	1	5570079	5570081	2	TTCAGATA
TCONS_00070676	XLOC_032365	W02F12.4	0.182	0.066	-0.116	0.0121622	W02F12.4a.1	=	V:6703056-6706932	-	1	6706440	6706452	12	AAGTTTGAATTTCAGCAC
TCONS_00012550	XLOC_004713	F26G1.2	0.218	0.098	-0.119	0.03507	F26G1.2a.1	j	II:4762674-4770042	+	1	4763081	4763196	115	TCATTCATCTATCCGTTTCCTCGATTTTACAACTTAATGATCACGATCTTCTCTTTTCCATTTTCCCTCAATTCTACCTGGTTTTGATTTCAAAACTTACTATTTGGTTTCATTTCAGAAG
TCONS_00086503	XLOC_039276	cca-1	0.121	0	-0.121	4.67833e-07	C54D2.5d.1	j	X:7847681-7875955	-	4	7851195;7855597;7856322;7857852	7851240;7855598;7856323;7857921	45;1;1;69	TAGATCGCATCGTGTGGGCGGGTTCCGCAATTAAATCGATTTTTTCAGTGG;TCAGCGT;TCAGGTT;CAGAATAAGTTAGGAGACTACAACATAATGTCTGGAGTTGGATTATAAAGTAGCAATTAATTTTTTTTCAAGTTG
TCONS_00087916	XLOC_039846	hpo-34	0.757	0.636	-0.122	0.0997314	F29G6.3a.1	=	X:11511557-11519236	-	1	11518521	11518522	1	TCAGGTT
TCONS_00012566	XLOC_004721:C33F10.4	C33F10.4	0.215	0.091	-0.124	0.090307	C33F10.4.1	=	II:4795702-4812136	+	1	4796745	4796752	7	CAGTTTTCAGAGT
TCONS_00009384	XLOC_003585:vab-10	vab-10	0.128	0.004	-0.124	1.00943e-21	ZK1151.1e.1	=	I:11707817-11923919	-	1	11771333	11771334	1	ACAGGAA
TCONS_00025041	XLOC_009605	rbf-1	0.128	0	-0.128	0.000500355	F37A4.7b.1	=	III:6669380-6703984	+	1	6699242	6699244	2	TTTAGGTC
TCONS_00037349	XLOC_014626:cfim-2	cfim-2	0.234	0.105	-0.129	0.0479424	D1046.1c.1	j	IV:8926192-8932791	+	1	8927918	8927924	6	TAGTTCTAGACC
TCONS_00032681	XLOC_012326	T21D12.12	0.982	0.853	-0.129	0.09759	T21D12.12.1	j	IV:259969-273582	+	1	266442	266448	6	TTTTTTCAGACA
TCONS_00071903	XLOC_032931:F46B6.5	F46B6.5	0.131	0.003	-0.129	1.41892e-06	F46B6.5e.1	j	V:9774893-9783062	-	1	9780269	9780425	156	TAGTAGCTTCAGTATCATCACTTCTGGTCAATTGCGATACAACGTACCAACAATTTCATGATGATTTGCAAGAAAAGATATCAAAGTCGCGTAGATCAGCAAATTTGCCCTCATTGTCGCCTGCAAACTCGGAAGAGTATTCCCATAATAATATTCCAGTGA
TCONS_00087625	XLOC_039746:suca-1	suca-1	0.209	0.08	-0.129	0.00363372	F47B10.1.1	=	X:10897677-10905107	-	1	10898571	10898572	1	TTAGATC
TCONS_00038665	XLOC_015176	trpa-1	0.134	0.003	-0.132	0.0105254	C29E6.2b.1	=	IV:11863880-11875738	+	1	11865069	11865072	3	CAGAAGATG
TCONS_00075860	XLOC_034748	ubc-19	0.133	0.001	-0.132	0.00281606	Y69H2.6.2	j	V:18685059-18689874	-	1	18687773	18687774	1	TCAGAGA
TCONS_00031002	XLOC_011689	svop-1	0.132	0	-0.132	0.000237735	ZK637.1.1	=	III:8882641-8886734	-	2	8883488;8884834	8883495;8884835	7;1	GAGTTTGCAGTTT;TCAGATG
TCONS_00024712	XLOC_009490	hpo-10	0.351	0.219	-0.133	0.0129239	F01F1.1a.1	j	III:5879488-5882923	+	1	5879826	5879845	19	CAGTTCTTCTTTTTCTTTACAGAGA
TCONS_00079881	XLOC_036530:rig-1	rig-1	0.353	0.218	-0.135	0.00462552	K09E2.4a.1	j	X:8647974-8681738	+	1	8661276	8661278	2	TTCAGAGG
TCONS_00076129	XLOC_034845	C14B4.2	0.159	0.025	-0.135	0.0799101	C14B4.2.1	j	V:19332423-19367333	-	2	19349494;19362669	19349495;19362676	1;7	TTCAGAT;CACTTTCCAGATC
TCONS_00028504	XLOC_010783:fbxa-42	fbxa-42	0.146	0.008	-0.138	0.00589582	Y54F10BL.1.1	j	III:2257544-2264139	-	1	2261443	2261451	8	CAGATTTTCAGAAA
TCONS_00068321	XLOC_031280	num-1	0.187	0.047	-0.139	0.000743823	T03D8.1e.1	=	V:20829810-20837552	+	1	20834878	20834884	6	AAGTTTCAGGGA
TCONS_00008724	XLOC_003314	sys-1	0.186	0.046	-0.14	0.067287	T23D8.9b.1	=	I:9980063-9984848	-	1	9984424	9984428	4	TTTTCAGATT
TCONS_00046596	XLOC_020070	fln-1	0.172	0.032	-0.14	0.058719	Y66H1B.2i.1	=	IV:359203-376062	-	1	363873	363879	6	CAGTTCCAGTTC
TCONS_00024288	XLOC_009357	eri-9	0.252	0.111	-0.142	0.000294582	C26E6.7a.1	=	III:4847008-4947317	+	2	4932548;4933376	4932574;4933382	26;6	TTTGTTTGAACAGTTTCTAATTTTTACAGCGT;AAGTTTCAGAGA
TCONS_00029878	XLOC_011253:npp-10	npp-10	0.158	0.016	-0.142	0.0216281	ZK328.5b.1	j	III:6013535-6019795	-	1	6019552	6019562	10	TTGCAAGTTTCAGCTA
TCONS_00074523	XLOC_034073	T01G5.1	0.154	0.009	-0.145	0.0184329	T01G5.1.1	j	V:15116843-15119765	-	2	15117147;15118800	15117148;15118810	1;10	ACAGGTA;CTATATATTTCAGGGT
TCONS_00074093	XLOC_033881	ZC376.1	0.148	0.003	-0.145	0.0504545	ZC376.1.1	j	V:14175515-14182960	-	1	14177353	14177354	1	TCAGATA
TCONS_00013656	XLOC_005182:fust-1	fust-1	0.156	0.008	-0.148	0.0616273	C27H5.3a.2	=	II:7142364-7155474	+	1	7152903	7152904	1	TCAGCGG
TCONS_00022885	XLOC_008838:zip-2	zip-2	0.431	0.283	-0.148	0.0850538	K02F3.4.2	j	III:832976-835808	+	1	833858	834086	228	GTCTTGTCGACCCCCGTCGTCTGTCTCCGACTGGGTGACATCATGTGAAATCTTGCCAAATGTTGTGCAATAGTGGGTGGAGCGTCCGCTCTAACGTGGTTTTTGGGTTTTCTCTGCCTCATTCTTTCGTTTTGACAAATTGTCCATTGGTGACTTTTTGTTTTTTTTTTCTATTTTGCTTACGGGAATCGATTGTTTTGACATGCTTTTGCCTAAACGGTGGTATTTTTCAGC
TCONS_00035139	XLOC_013442	fkh-7	0.15	0.001	-0.149	0.0227719	F26D12.1m.1	=	IV:5567019-5610368	+	1	5608312	5608369	57	CAGATTTCGCAGCAAAAATTGTTTGACACGAGCGCTTTGAGCTCATTTTTGGAAATGCAGAAC
TCONS_00090029	XLOC_040742	K09E3.7	0.993	0.844	-0.149	0.00039276	K09E3.7.1	=	X:17131234-17134527	-	1	17133511	17133525	14	GCGTGTTATTTTTTCAGATT
TCONS_00037332	XLOC_014621:spr-2	spr-2	0.995	0.843	-0.151	0.00828363	C27B7.1a.1	=	IV:8888885-8892747	+	1	8892046	8892049	3	CAGAAGCCG
TCONS_00085219	XLOC_038757	C31H2.4	0.151	0	-0.151	0.0319302	C31H2.4.1	j	X:5154934-5159954	-	2	5158791;5159661	5158793;5159667	2;6	TACAGGCC;ATATTGCAGATG
TCONS_00037547	XLOC_014676:wnk-1	wnk-1	0.158	0.006	-0.152	2.01207e-08	C46C2.1r.1	=	IV:9196274-9214236	+	1	9203709	9203715	6	TAGTTTCAGTGG
TCONS_00073172	XLOC_033509	ZK863.8	0.961	0.809	-0.152	0.0923236	ZK863.8.1	j	V:12186334-12187758	-	1	12186938	12186939	1	ATAGGTC
TCONS_00006988	XLOC_002664:mtk-1	mtk-1	0.31	0.157	-0.153	0.012712	B0414.7b.1	j	I:5768918-6033475	-	1	5795641	5795647	6	AAGTTTCAGGAC
TCONS_00085128	XLOC_038721	tsp-14	0.155	0	-0.155	0.0600442	F39C12.3b.1	j	X:4866074-4876853	-	2	4868228;4869012	4868229;4869025	1;13	TCAGGCT;AAGTAAATATCTTTAGCTG
TCONS_00065948	XLOC_030109	F14D7.6	0.157	0	-0.157	0.00426616	F14D7.6c.1	=	V:14301079-14306444	+	1	14305838	14305849	11	TAGTCACTTTCCAGAGA
TCONS_00031527	XLOC_011898	T16G12.1	0.843	0.686	-0.157	0.000732436	T16G12.1.1	=	III:10040180-10050125	-	5	10040664;10042359;10043075;10044490;10044719	10040665;10042363;10043076;10044503;10044720	1;4;1;13;1	TCAGAAT;TTTTCAGGCT;TCAGATG;AAGTTCTGTATTTCAGTTT;TAAGCTT
TCONS_00060778	XLOC_027714:F48G7.4	F48G7.4	0.171	0.013	-0.158	0.0500609	F48G7.4.1	j	V:615555-621679	+	1	619434	619453	19	TCGAAGTTTGTATTATTTACAGCAA
TCONS_00089956	XLOC_040730:gcy-11	gcy-11	0.237	0.078	-0.159	0.0268872	C30G4.3.1	j	X:17035205-17072344	-	3	17047280;17049603;17049993	17047281;17049605;17049996	1;2;3	CCAGGAA;TTCAGATG;GAACAGGTA
TCONS_00014753	XLOC_005637	C05C10.2	0.256	0.096	-0.16	0.0438906	C05C10.2b.1	j	II:9918046-9930830	+	1	9930448	9930454	6	TAGTTTCAGAAA
TCONS_00012345	XLOC_004640:C16A11.10	C16A11.10	0.349	0.19	-0.16	0.00831541	C16A11.10.1	j	II:4226581-4234620	+	1	4230392	4230465	73	CAGTTCGTGCTCGCCGCCACAACAGCCATAGCTGAAGCACATTTGTCGGATGCTTCAGTCATCGACGGAATTTCAGCCA
TCONS_00031300	XLOC_011807:acox-1.5	acox-1.5	0.942	0.782	-0.16	5.35816e-09	C48B4.1.1	=	III:9568750-9595810	-	1	9587171	9587172	1	TCAGGCT
TCONS_00025915	XLOC_009939:plg-1	plg-1	0.209	0.048	-0.161	0.0115831	F44E2.11	j	III:8843662-8869963	+	1	8859645	8859650	5	CAGTTGTCGAT
TCONS_00050269	XLOC_021924	C17H12.2	0.489	0.327	-0.162	0.093988	C17H12.2.2	j	IV:6786789-6792629	-	1	6789641	6789644	3	TTTTTCAGG
TCONS_00075714	XLOC_034677	R10E8.6	0.941	0.779	-0.162	5.55627e-05	R10E8.6.1	=	V:18258107-18266428	-	3	18260310;18261676;18262967	18260311;18261686;18263108	1;10;141	TCAGCGA;CAGATATTTTCAGGAA;CAGACCGCCCGCTTTTCCAAGAAAGCAATAATTTCAAGGCCGATGCGCAAAAAAAAACGAACATGGACTGGAACACTCTGTTCGCGATTCTTGCCATACCAATAGGAAACATATTGTAATGGAACAAATTGCATTCTCTTCCAGCTC
TCONS_00016209	XLOC_006265	nurf-1	0.338	0.173	-0.165	0.0216791	F26H11.2k.1	=	II:14390717-14407905	+	1	14400792	14400798	6	AAGTTCCAGGCT
TCONS_00032534	XLOC_012270	T05D4.3	1	0.834	-0.166	0.0159437	T05D4.3.1	=	III:13566135-13583591	-	1	13567762	13567763	1	TCAGAAT
TCONS_00002045	XLOC_000737:C10G11.6	C10G11.6	0.417	0.251	-0.167	0.0184172	C10G11.6b.1	j	I:6284012-6297625	+	2	6292200;6293643	6292245;6293690	45;47	AAGAAACATGTGAAAATGCAATTTGTATCATCACAACAATAATTTCAGTTC;CAGAAATTAAATCATTTCAGTATTAGGAATAATTCGAATTCAATTTTCAGACC
TCONS_00010398	XLOC_003930	sur-2	0.28	0.112	-0.168	0.038389	F39B2.4b.1	=	I:14777138-14788073	-	1	14785643	14785649	6	AAGTTTCAGCTT
TCONS_00060716	XLOC_027683:nhr-202	nhr-202	0.221	0.051	-0.17	0.0448335	M02H5.4a.1	j	V:462312-468560	+	1	463337	463338	1	TCAGGGC
TCONS_00088279	XLOC_040021	npr-4	0.191	0.019	-0.172	0.00312492	C16D6.2b.1	j	X:12536825-12551961	-	7	12538090;12539594;12539804;12540218;12540389;12540591;12540859	12538092;12539617;12539806;12540220;12540390;12540593;12540862	2;23;2;2;1;2;3	TTCAGACC;TAGACTCTTCTGAAGTTAGTATTCAGGTA;TTCAGCTG;TGCAGATT;TCAGGGT;TACAGATC;TTTCAGAAT
TCONS_00024439	XLOC_009413:pqe-1	pqe-1	0.272	0.099	-0.173	0.00231738	F52C9.8b.1	=	III:5282444-5467992	+	1	5315809	5315815	6	CAGTTTCAGAAG
TCONS_00029732	XLOC_011202	swp-1	0.3	0.127	-0.173	0.0145891	B0336.9b.1	j	III:5698429-5705464	-	1	5705325	5705364	39	CTTATGCCTTGCAACTGTTTTAAAAGTAATGTGCATGTTCAGGAA
TCONS_00037884	XLOC_014825:ent-7	ent-7	0.226	0.051	-0.175	0.0496783	F44D12.9a.2	=	IV:10017424-10021286	+	1	10019016	10019263	247	AAATGACTAAACACATGCAACAAGAAGAAGAAGGCTCTCCCTTATCTTATTTTCAATGTATTTTCACATAAAATTTCGTTGTTCATAATATAAAAATCTGTAGATCTTCATGTAGAGTATAATATTTGTAATGGCAGAAAATGGGGGCAAACAACCCTGTGGGTACTAAAAATATACCAAAATTAACATTTATCAAATTCGTACCTGATAAAACCGTAAACTTGAAGCATATTGAATCAGTAACTTTCAGCAA
TCONS_00074679	XLOC_034158	C06B8.2	0.175	0	-0.175	0.0679432	C06B8.2c.2	j	V:15471334-15478699	-	1	15478356	15478360	4	GTTTTAGAAC
TCONS_00059233	XLOC_026828:Y51H4A.7	Y51H4A.7	0.405	0.23	-0.175	0.0517243	Y51H4A.7.1	=	IV:16535688-16542894	-	2	16541396;16542323	16541398;16542332	2;9	TCCAGCTC;TCAATTTTCCAGCAT
TCONS_00016713	XLOC_006431:C24H12.9	C24H12.9	0.39	0.214	-0.176	0.0980468	C24H12.9	j	II:416838-453397	-	2	419800;424879	419888;425043	88;164	CAGAGGGCCCGGATTAAAGTCGGTTTAAAGTCTGGAAATCTGCCAAAATTGAAAAGATTTCAATTAAACTACTGGTGGGATGAATTTACAGGCG;CAGAGATGGATATCGGATTTGTATTGAATTTTTTTCACAAAATCATCCGAGATCCATTTGCAAACGTGTTACCATAATTATGGCGCACCCTGGATGTCCTAAGCCTATTTAGGCCTAATTAAAAAGGCCAAGCTTAAAGTCTTTCCAACCGTTGCCAAAACTTTCAGCAC
TCONS_00032259	XLOC_012164	snr-6	0.326	0.151	-0.176	0.000913773	Y49E10.15.1	j	III:12426861-12441147	-	1	12429628	12429630	2	TACAGATC
TCONS_00016301	XLOC_006302:mltn-9	mltn-9	0.183	0	-0.183	0.000190697	F19H8.4.1	j	II:14615030-14630121	+	2	14616695;14618330	14616697;14618332	2;2	TGAAGGGA;CAGAGATT
TCONS_00018195	XLOC_006980:C46E10.8	C46E10.8	0.797	0.614	-0.183	0.0785439	C46E10.8.1	j	II:3724224-3731939	-	4	3726892;3728283;3728469;3729530	3726897;3728284;3728470;3729531	5;1;1;1	GGTTTTAGATC;TCAGCTA;CCAGGTT;TCAGAGG
TCONS_00007256	XLOC_002773:mdt-18	mdt-18	0.258	0.075	-0.183	0.0724654	C55B7.9a.2	=	I:6490715-6496109	-	1	6493847	6494246	399	AAAAATGTTAAAAAGTAACAATTTCCGAAAGCGCAATTTAAAAAAGTACAAAAAAGTACAAACTTTTATGGAGACACTACTGATTTCTGGAATCTGTTAAATCTTAGAAATGAACTCTTTCAGAATTTCAAACTTCTTTTTTTATATGCGTAAAACTTATCGCATATATTTTATGCAATATTGAAAGTAAGTAGAGTTTTAACCATTAAAGTAACTGAAACCAGAGTTTTATCGTAAAAATGGTAAAATATTCGGGAGTGTTGGTTTCCCTGGAAATGAGTCACGTAGAGTGTGAGTCCGCAAACACCAGCTGTGAATTGCGTAGAATACATTTAATATCACGCTCAAATAGTTTTGAATTAATTTAATTTTTTAAAAACATTTTTTATTCTGTTTATT…
TCONS_00075662	XLOC_034661:C31G12.4	C31G12.4	0.205	0.021	-0.184	0.0958067	C31G12.4b.1	=	V:18172438-18178767	-	1	18178003	18178005	2	TTCAGATC
TCONS_00068319	XLOC_031280	num-1	0.206	0.02	-0.186	3.81234e-07	T03D8.1d.1	j	V:20829810-20837552	+	2	20833091;20834878	20833098;20834884	7;6	TTTAGCTCAATAT;AAGTTTCAGGGA
TCONS_00046484	XLOC_020042	frm-5.1	0.99	0.802	-0.187	0.0202172	Y38C1AB.8b.1	j	IV:32480-48889	-	3	45181;46594;47235	45190;46600;47236	9;6;1	TGTCAATTTCAGACG;AAGTTCCAGAAA;GCAGATC
TCONS_00080970	XLOC_036955	pgp-4	0.37	0.181	-0.189	0.0100858	F42E11.1a.1	j	X:11160980-11392852	+	1	11359147	11359153	6	CATTTTTAGGAG
TCONS_00033096	XLOC_012480	K03H6.2	0.193	0.004	-0.189	0.0209841	K03H6.2a.1	j	IV:1510545-1515449	+	1	1512627	1512636	9	CAGCATATTCTCAAT
TCONS_00038778	XLOC_015230	eri-12	0.584	0.394	-0.19	0.0132799	B0001.6.2	=	IV:12156837-12164266	+	1	12162808	12162814	6	AAGTTTCAGATC
TCONS_00084801	XLOC_038594	clh-4	0.191	0	-0.191	0.041074	T06F4.2a.1	=	X:4094866-4100573	-	3	4096439;4098677;4100283	4096448;4098678;4100284	9;1;1	CAGACTTTTTAGACG;TCAGTAA;TTAGGGA
TCONS_00023561	XLOC_009072	H05C05.1	0.753	0.561	-0.192	0.00237854	H05C05.1c.1	j	III:2910819-2960574	+	2	2957274;2958090	2957349;2958227	75;137	TAGAATTACTGTAGTTTTCGTGGTGGGACCCAATTTGGTGGCCCTGAAAAATTTCCAAAATTTCCAAAATTTTTGCAGAAT;TTCACGAAGTTTACCTTTGTTTCACAAATGCTAAATTTCTCTCGAGATTTTTGGAATTTTTTCGTACTTTTTTTTTTGGCAAAATCGAAATTTTGTCAAGAAAAAAAAATTAATTTTATGCCATTAAATTTGTTGCCTAGTTC
TCONS_00078084	XLOC_035655	ZK470.2	0.203	0.01	-0.192	0.000237735	ZK470.2c.1	j	X:4134716-4148236	+	1	4146443	4146453	10	TTTTTCAGCTCGGCAG
TCONS_00037308	XLOC_014617	alp-1	0.471	0.277	-0.195	0.00583417	T11B7.4b.1	=	IV:8852494-8867765	+	1	8860357	8860546	189	TAGTGAGATCATGGTGGTGAGATGATGACAACAACGAGAATTGAAGTTGAAAAGAAGTATCTGTAGGAGATAATTATTCATTTATTTATGTTTATCATCCGGTGTATTTCAGTAGTATTCTAGTCAAATAAAATTGTTCAATGAGCACGCACTCACCATAATTCCATCATATTCTAACAACATTCTATCTAGGTT
TCONS_00020450	XLOC_007877:T24B8.4	T24B8.4	0.204	0.009	-0.195	0.0735832	T24B8.4a.1	j	II:9062271-9080230	-	1	9064274	9064461	187	AATGTTTTTAGGGTTACCTTTGAGGCATATTGTGCCTTTTTACTGACTCTATGAAAGACTAGTATATTTAAAAATTTATACAATCTAAGTACACATCAATTTTTACAACATGCATGTATGATCCAACTCCATAAATTTCCAGATTTCTCTTGTTTCTGAGACTTTTCATTTTTAAATCTTAATATTTCAGATC
TCONS_00016210	XLOC_006265	nurf-1	0.276	0.08	-0.196	3.23127e-08	F26H11.2b.1	=	II:14390717-14407905	+	1	14397085	14397091	6	CAGTTCCAGAAT
TCONS_00070078	XLOC_032083	C03A7.13	0.228	0.031	-0.197	0.0663294	C03A7.13.1	j	V:5163268-5213468	-	1	5179648	5180205	557	CAGAGAGATACTGGCGGTTGCGGAGTGCCATCGAGGAAGAAGAGATAAGCGGTGTGAATAAGATAACACAATTGTATGTCACAAAACCCCTTTATTGCTCATAGAATAACAAGTAATTTAGGTCATTAGGTCCAAAGACGGCCGCTCACGGTGGAGCGGCCGACATCCAACGAGGCCGACATTGATGTTGGAATGTGTGGAGCCAGACGTGGTGGACGTGGTGACTTGTTGACTTGGTCGTAGATAGCGAAGTGAATTGAGCGGAGCGGCTTACGTTTTAGGCCAGGGATAATTATACGAAAAGGGGGGAGCTGCGCCTTTAAGGGCGCGGCGAGACCATTTGGAGGGAATTCAAAGAAGGAAGCGTACTGGAGACGAGTTAAGGGGGAAACGAGATTG…
TCONS_00010353	XLOC_003918	ttm-5	0.904	0.707	-0.197	0.0189298	Y54E5A.1.1	j	I:14634140-14737061	-	1	14691734	14691736	2	TTCAGATC
TCONS_00003941	XLOC_001525:nhr-74	nhr-74	0.643	0.444	-0.199	0.00428627	C27C7.3.1	j	I:11422189-11432145	+	1	11431885	11431886	1	TCAGAAG
TCONS_00006847	XLOC_002611	hil-8	0.272	0.072	-0.199	0.0211684	T05E8.2.1	j	I:5462512-5471062	-	2	5466005;5466639	5466014;5466640	9;1	AAGGTTTTTCAGGTG;TCAGGAT
TCONS_00017986	XLOC_006888	gcy-19	0.228	0.025	-0.203	0.0694924	C17F4.6a.1	=	II:3250973-3271505	-	1	3257174	3257176	2	TTCAGTCA
TCONS_00017700	XLOC_006777	gcy-21	0.205	0.001	-0.204	0.0237243	F22E5.3.1	x	II:2655223-2665173	+	1	2658011	2658981	970	AAATCTTAAAAAAAAACCAACATTTAATAAAAGTTTTTAACTTCAGAAATCAGTCAAATCATAGTATGCATTTATGCACTCCGATCGTCTGCAAGTTCTGTAATTCTAGTGATAACTACGCCACCTTACCGGGCATATATCATAAGGTAGGAAAAGAATTGGAATAAACCACACCAAATTATTTCAGAAAATTCGCAAGTAAACTGGGAGTGAAAGCATCTCCGGCGATGGGCTCGACGAGCATTATGTGATGTTGTTATGCCTTTGAATAAATTTGTTCCCATTTTAAATGCAAAATTAATAGTTAAAAATTGTTGGAAATGTTTAAAAAAATTTTCAGTTATATTCGGTATGGTGTACGTGGTGTAAGAGAGAAAAAAATTCCCACATTTTTTTGTA…
TCONS_00051074	XLOC_022291	tag-77	0.716	0.512	-0.204	0.0979335	C28C12.10b.1	=	IV:8503492-8510559	-	1	8507331	8507332	1	TCAGCTT
TCONS_00070084	XLOC_032084	Y47A7.2	0.206	0.001	-0.205	0.00711273	Y47A7.2.1	j	V:5163268-5213468	-	1	5197588	5197589	1	TCAGACC
TCONS_00047243	XLOC_020297	Y54G2A.11	0.589	0.382	-0.207	0.0998069	Y54G2A.11a.1	=	IV:2765718-2777124	-	2	2766524;2771109	2766715;2771118	191;9	TACCCAAATTGAAGCTCAGCTCTTGATGAGTTAAATACTAATTCAAAAACGATACTCTAAGAAAATTTTGGGTCTCGCCGCGAAAATCTCAAAATTATCAAATTTAGGTCAATTTTTAAAATTTTTTTTGCAATTCGCATGAAAACTTAACTTTAAAGCCCATTTATAAATTTTTGCAAGAAATTATTTTTCAGAAA;AAGATATTACAGACC
TCONS_00003802	XLOC_001464:Y95D11A.3	Y95D11A.3	0.529	0.318	-0.211	0.06634	Y95D11A.3.1	j	I:10933809-10945690	+	1	10936101	10936821	720	AATGGCAATTTTCATTTATTTTTGTGTAAAAATATCGGTTTTCCTTGTTTTTTAATGCTTTTGCGCTGATTTTTGATGTAAAAGCTATTAGAAATTGTCTAAATTTTGTCGGAATGCATCGGGAACCATCACAATTTGGTTTTTTGGGTGTATTTCTCTTGTCTGAAAGTTTCCCGCTGGAGGTTAAACAATTGTTCCAAGAAATCGATAGAAACGTTTCAAGACATATTTAACGAAAAATATTTATTCTAAAAGATCAAGTACAGCACGAACATCAATTTTCCTCCGTTGAAAGCTGAAAATATACAGAATTTGTCAGATTCATTTATTTTTTCTCGGCAATCCCTCACCGATCCGCGCTTCTTTTTCCCTTTCTTCCGTCTCGCATCCGTCTTAATC…
TCONS_00014936	XLOC_005720:ZK673.1	ZK673.1	0.999	0.788	-0.211	2.45593e-05	ZK673.1a.1	=	II:10436135-10445557	+	1	10444180	10444217	37	CTCAAATTGTGCCTTTTTTCAAAGTGTGAACCATTTTCAGCGT
TCONS_00019597	XLOC_007584:C30G12.6	C30G12.6	0.373	0.162	-0.211	0.000524755	C30G12.6a.1	j	II:7292191-7299222	-	2	7296377;7297501	7296378;7297502	1;1	GCAGCAA;TCAGGGA
TCONS_00083248	XLOC_037998:cgt-2	cgt-2	0.286	0.072	-0.214	0.065196	F20B4.6.1	j	X:17695164-17718720	+	1	17696473	17696527	54	CAGTAATGGGCGATAAAATAACCGGTTTGGAGGTTGAGATTATTCCGGAAATTTCAGAAG
TCONS_00085252	XLOC_038776	ags-3	0.91	0.694	-0.215	9.66357e-06	F32A6.4a.2	=	X:5289727-5306328	-	1	5290670	5290671	1	TCAGATG
TCONS_00021411	XLOC_008268	mfn-1	0.554	0.334	-0.22	0.0275636	W02B12.9.1	j	II:11470009-11472056	-	1	11471006	11471018	12	AAGAATGAATTACAGGCT
TCONS_00018708	XLOC_007197	pmt-1	0.22	0	-0.22	4.49868e-25	ZK622.3a.2	=	II:5278136-5288991	-	1	5280279	5280455	176	CATTTTTTTTGCTTATACGGTGTGCGTGTTTCTGTTTTCCCATACCAAATCGTCTCCTCGTAGTCTCATTATGTCGCCGAGCTTGTTTGCTTTGGTGACCAGGAGAAAAACAAGTGCAAACATACTGTCATTGTTCAAAAGGAACCGGCAAGGCTGCTCAATTTTATCATTATTTTCAGAGC
TCONS_00001819	XLOC_000651:vps-34	vps-34	0.665	0.443	-0.222	0.0506675	B0025.1c.1	j	I:5768918-6033475	+	1	6029772	6029949	177	CACAGTTTTGGTCTATTTTGAAATCTAACAATTGAGAAACTACAATTTCTGTTTCAAAGAATCAATTATTTTATTCGAAAAGCCTTCCATATTATAATTTTCAACCCAAATTAATTCTACTATGATTTAAAATAACCAAACCAATCAAAAAAAATTTTATCTTGAACTTCGAATTTTCAGATG
TCONS_00002063	XLOC_000745	hrpk-1	0.916	0.693	-0.223	0.0127715	F26B1.2a.1	=	I:6317700-6324018	+	1	6318020	6318044	24	AGCATTATTCAAATAAATTTGTTTCAGGCC
TCONS_00068825	XLOC_031487	nhr-179	0.244	0.021	-0.223	0.0849302	F16B4.11f	=	V:1612802-1639300	-	1	1616773	1616910	137	TAACATTTGCAAAACTACACAAAAATTTTACTTTAATGACAATTCAAATTTATTCGCTTCAAGAAATTTGCGCTAATATATCAGACTGTAGAATCACTTCTTGGCATCAGTAATTTAATTATTCTACTTGAAAATCGAAGTGA
TCONS_00051952	XLOC_022630	R11A8.1	0.666	0.443	-0.223	0.0774086	R11A8.1.1	=	IV:10353166-10357186	-	2	10356732;10356869	10356734;10356870	2;1	TTCAGAGA;TCAGTAT
TCONS_00029969	XLOC_011282	esyt-2	0.465	0.241	-0.224	0.0336221	T12A2.15a.1	j	III:6217370-6230970	-	2	6225850;6229402	6226108;6229403	258;1	AGAGATTTTATTCAAAATTGCAGTATTTTTGATTACCCAGAACGAAAAATCTGAGCAGTACGGTGCATTTTGTAGGTCGTTGTTACCTGCCTACAAGTCTTACTATAGATATATCTGCATTATATTATAGTATGCGATTCTCATTATCCAATTTCGATTAATTGTTTTGAAGTTCAACTGCGAACACTTTGGCTATAGGTAGTTATAAAAACCTAATATTCTGATGCAACATGTTATATGCGCAAACTATGAATGAACTAGTTT;TCAGAAG
TCONS_00039098	XLOC_015353:K08D8.1	K08D8.1	0.311	0.086	-0.225	0.0551371	K08D8.1.1	j	IV:12892460-12896383	+	1	12894259	12894629	370	CAGGTGTCCTGCTACATAAGATGTATTCCCATTGCAATTTTCATGGTTATTGTTATCGGATTCATTGCAACAGTAATATTGATGCTGATCCAACTTTAACATGAACTCTTTGCTTTATGTGTCTTGAAGTAGAGCCCATTAAATTAATGAAGTCGTTCTTCAATTCTATCCCTGCCAACACACAACAATAGAAAAAAAACAATAGAAAAATTTATTTCAAAAAAATTTGGGCACTTAAATTTTTCTGTTAACTTTGAATTCCAAACATCAAAACTATAAGATACATAATGTCGCCTGCGTCTAATAGATTATTAAAACCTAAAAGACTATTAGATAACCTAAATAAGCCCGGCATATTCACACTACTTTTCAGGTG
TCONS_00084644	XLOC_038523	R11G1.6	0.911	0.685	-0.226	0.000201341	R11G1.6d.1	=	X:3639188-3645039	-	2	3639836;3643139	3639842;3643140	6;1	TAGTTGCAGCGG;GCAGACA
TCONS_00082479	XLOC_037678	gob-1	0.371	0.143	-0.228	0.00158454	H13N06.3a.1	=	X:15493535-15497504	+	1	15493606	15493608	2	TTCAGGAC
TCONS_00030037	XLOC_011303:let-767	let-767	0.567	0.339	-0.228	0.0397107	C56G2.6a.2	=	III:6338507-6341970	-	1	6339096	6339108	12	AAGTTCTTAACTCAGCTC
TCONS_00006201	XLOC_002361:F21A9.2	F21A9.2	0.824	0.595	-0.229	0.038868	F21A9.2.1	=	I:3539553-3827118	-	3	3706357;3706792;3708061	3706358;3706794;3708062	1;2;1	GTAGGTA;TTCAGGAA;TCAGAAC
TCONS_00075909	XLOC_034777:Y17D7B.7	Y17D7B.7	0.969	0.737	-0.232	0.0162145	Y17D7B.7	=	V:18780489-18786857	-	3	18781055;18781726;18781805	18781056;18781727;18781806	1;1;1	TTAGCGA;TCAGATA;CCAGAAT
TCONS_00026795	XLOC_010258:W09D6.1	W09D6.1	0.324	0.09	-0.233	0.00381069	W09D6.1b.1	j	III:11063259-11073990	+	2	11063873;11072149	11063878;11072166	5;17	CAGCAAACCCC;CAGAAAAACCCGTATTCCAGCAC
TCONS_00009711	XLOC_003725	vps-25	0.872	0.639	-0.233	0.0664706	W02A11.2.1	=	I:12733286-12741275	-	1	12736587	12736782	195	TGTGAGAGAGAGAGAGAGAGAGAGAGAGAGAGTGTGTATTGATTGGGCTGTCAGACACACACACACACACACACACACACACACGCGCGTGGTTGTTCTCTGCGTCTATAATTCTCTCTCCCTCTCGTCCTCTCTCTCTCAATTGAGGATTCCTCCCAGGGAAGGTGGTGGTCCCCTTTTTACTCTATTTTATTCTAGATG
TCONS_00002451	XLOC_000900	kbrl-1	0.28	0.046	-0.234	0.0627383	F52A8.6c.4	=	I:7339203-7352235	+	1	7348429	7348432	3	CAGGCCACA
TCONS_00071595	XLOC_032790:nhr-144	nhr-144	0.238	0	-0.238	0.0704402	F59E11.12	j	V:8972858-8977661	-	1	8976436	8976439	3	CAGCAGTTC
TCONS_00073480	XLOC_033659:ZC443.1	ZC443.1	0.878	0.64	-0.238	0.000557926	ZC443.1.1	=	V:12806489-12811967	-	1	12808535	12808536	1	TCAGCGT
TCONS_00082763	XLOC_037809:twk-22	twk-22	0.244	0.002	-0.242	0.00246366	T01B4.2a.1	j	X:16299897-16317735	+	3	16308615;16312071;16313296	16308908;16312213;16313299	293;142;3	ACAGGATAGCTCAGTCGGTAGTGGTGGTCGCTAGCAATCTGGAGGTCACTAGTTCAAGTCCGCCTAGGTTCACCCAGCCTTTATTGAAAAGTAGAGCAATCCACGACTGGATTATCGGTCACAGTCCCCGGCTAGGACGTGGCTAAAAGTATTGCCCAGTGGGAGCACCACTAGGCGGTGTACCTGACTCCCAGAGCCGCAGTGCATAGCGTTTGAGGAACAGATCGTTCTTTAATCCTTGTTTTATAAGACTGAAACTATTTATATCAATGTTATGATTACACTTGGTTTTTCAGAAA;CAGGGATTGCTAGAAATTAAAATTTGTTACATCTCAGTAATGATTAACGGAGCCTTAAAAATGTCGGGCGATGCTGTTAATTTTCCTAGATTTCTCAAT…
TCONS_00070480	XLOC_032264	mrck-1	0.344	0.101	-0.243	0.000158967	K08B12.5a.2	=	V:6257391-6267287	-	1	6258924	6258935	11	TAGCTTAATTTCAGGAG
TCONS_00001632	XLOC_000579:npp-6	npp-6	0.246	0.002	-0.244	0.0687563	F56A3.3a.3	=	I:5165151-5186234	+	1	5179897	5179906	9	CAGAAATTGCAGAAG
TCONS_00018284	XLOC_007009	plpp-1.1	0.435	0.19	-0.244	0.000500355	F53C3.13b.2	j	II:3919664-3931819	-	1	3927982	3927988	6	CAATTTTAGGCA
TCONS_00090184	XLOC_040800	H18N23.2	0.313	0.068	-0.244	0.00214113	H18N23.2c.1	j	X:17614208-17640827	-	2	17624501;17625607	17624502;17625613	1;6	ACAGATC;TAGTTCCAGATG
TCONS_00046546	XLOC_020057:R02D3.7	R02D3.7	0.67	0.426	-0.244	0.000237735	R02D3.7.1	=	IV:253570-257241	-	1	254095	254096	1	GCAGAAA
TCONS_00087435	XLOC_039676:rme-4	rme-4	0.256	0.012	-0.245	0.0877653	F46F6.1a.2	=	X:10373234-10406303	-	1	10374737	10374743	6	TAGTTCCAGAAA
TCONS_00027087	XLOC_010372	zyg-8	0.279	0.032	-0.247	0.0102532	Y79H2A.11a.1	j	III:12052423-12072312	+	1	12058844	12058846	2	TTCAGATC
TCONS_00077196	XLOC_035234:H02F09.3	H02F09.3	0.253	0	-0.253	0.0898627	H02F09.3.1	j	X:1568670-1574118	+	1	1572905	1572914	9	CAGGATCGTCAGTGC
TCONS_00052237	XLOC_022749	bcc-1	0.88	0.625	-0.255	0.02535	M7.3.1	=	IV:11086073-11092853	-	1	11089692	11089693	1	TCAGAAA
TCONS_00037082	XLOC_014545:col-116	col-116	0.527	0.27	-0.256	0.0836019	F17E9.1.1	j	IV:8348121-8360146	+	1	8356264	8356275	11	CAGAATTTCTACAGAAT
TCONS_00020847	XLOC_008050:let-268	let-268	0.756	0.499	-0.257	0.00521465	F52H3.1.1	j	II:10026594-10039980	-	1	10038120	10038122	2	TTCAGAAA
TCONS_00016298	XLOC_006302:mltn-9	mltn-9	0.316	0.058	-0.259	0.00153678	F19H8.4.1	j	II:14615030-14630121	+	1	14616695	14616697	2	TGAAGGGA
TCONS_00023465	XLOC_009043	zmp-2	1	0.737	-0.263	0.0442341	H19M22.3a.1	j	III:2636318-2642860	+	2	2638513;2640724	2638592;2640739	79;15	TCAATGGCGAGGTGCCGAAGAATCAGTGGGGGAGGAATAAGACAAAAAGTTTTCAACACACACAACTGTGCAAGTTTTTCAGGGT;TAGATTGATGAATTTCAGATG
TCONS_00027332	XLOC_010443:unc-25	unc-25	0.686	0.422	-0.264	0.0329226	Y37D8A.23a.1	j	III:12934095-13029708	+	1	12941705	12941799	94	TAGATTTTTCAAGTTTGACTTTGCGAGAAAAAAATCGGAAAAACCTCGATTCGACGCCGAAAAATGCTCCTTTTCGAAAAGATTTTTGAAATTTCAGAAA
TCONS_00036702	XLOC_014382	unc-82	0.464	0.198	-0.265	0.000125428	B0496.3e.1	j	IV:7424497-7445504	+	4	7428926;7437441;7440203;7443007	7428931;7437479;7440282;7443052	5;38;79;45	CAGGTGGACGA;ATTGATATTTTAGATTTAGAACTAACCGGCTTTTGATTTAGGCA;TATGTATATTTTAACGATTTCTGTGGAATAAATTCACCCGGTCCTCTATTTGCTCCCCCGTGGCCACAAATTATTTTTCCAGACA;CAGCATGAATTTCTTGATCAACTTCTAAGCATGCGTTTCATTCTCCAGGTG
TCONS_00012400	XLOC_004654:athp-2	athp-2	0.591	0.325	-0.266	3.57788e-06	H20J04.2.1	j	II:4328812-4353159	+	1	4340151	4340182	31	AAAATGCACTATAATTTTCCCCCAATTTTAACAGAAC
TCONS_00038702	XLOC_015191:nhx-9	nhx-9	0.29	0.024	-0.266	0.0418398	ZK822.3a.1	j	IV:11930865-11952208	+	1	11932479	11932481	2	TTCAGCTC
TCONS_00014646	XLOC_005601	exc-7	0.32	0.052	-0.267	0.0920493	F35H8.5.1	j	II:9566513-9581540	+	1	9575964	9575971	7	GAAATTACAGATC
TCONS_00071360	XLOC_032692	F52E1.9	0.27	0	-0.27	1.32883e-05	F52E1.9a.2	=	V:8397644-8402669	-	1	8399063	8399064	1	TCAGGTC
TCONS_00074493	XLOC_034057	cng-1	0.427	0.157	-0.271	0.0967945	F14H8.6c	=	V:15025332-15031673	-	1	15027425	15027426	1	TTAGAAC
TCONS_00089790	XLOC_040686	tag-343	0.273	0.002	-0.271	0.000105615	F43B10.2b.1	=	X:16665115-16676277	-	3	16667322;16668419;16671796	16667323;16668420;16671798	1;1;2	TCAGAGA;TTAGACG;TTCAGGAA
TCONS_00030540	XLOC_011500	cdh-3	0.538	0.267	-0.271	3.80767e-05	ZK112.7.1	=	III:7741247-7757487	-	1	7751911	7751912	1	TCAGATT
TCONS_00085379	XLOC_038828	ifta-1	0.867	0.594	-0.272	0.0584785	C54G7.4.1	j	X:5543950-5552803	-	4	5545984;5546156;5546286;5546895	5545985;5546157;5546288;5546897	1;1;2;2	TTAGAAA;TTAGCTC;TTCAGACA;TTCAGAAG
TCONS_00087640	XLOC_039748:F47B10.9	F47B10.9	0.603	0.331	-0.272	0.0948263	F47B10.9.1	j	X:10912117-10920013	-	1	10913215	10913216	1	TCAGTTT
TCONS_00015593	XLOC_006009:ife-5	ife-5	0.397	0.124	-0.273	0.0269874	Y57A10A.30.1	=	II:12269814-12284133	+	1	12282880	12283360	480	CGGAACTTTTCGAGACGTCAACTTACACCGGCTTTCTTTACAGGTTGAGACCAAACGTTCCAAAACCCAACCGCTCGCCACTGTTCCGGCGGTACAGGGTACGGAAATCACCATAGATTGAGCTAAACGCCGGTCTATTCCTACATCTCACCACACAAGGACCGTACCCCATTGTTGATCTCTCGTTCACACCGCTTATCCTCCTCTTCGCTCGGCACTCTGCAAACGCCAGTTCTCTCTTAGACTCTTCTTCCGGCTTGACCCCAGTTGCGGCTCCCCAACCCGCTACACTGGGCGGTCAACACTTTTTTCGAAATTTTAACTGGCCATAAAAAAATTTTGGAAATTTTTTGAGAAGTCTCATTATGAAATTTGGTAGTTTTGGACCATTATGAGTCT…
TCONS_00084323	XLOC_038374	C14A11.6	0.314	0.039	-0.275	0.0417167	C14A11.6a.1	=	X:2810395-2814177	-	3	2812116;2812835;2813163	2812121;2812838;2813201	5;3;38	ATTTCCAGAAA;ATTTAGCAT;TAGTTTTTTATTATCAGACTGCCAAGCGATATCAATTACAGTCA
TCONS_00028938	XLOC_010921	F34D10.6	0.336	0.06	-0.275	0.048057	F34D10.6a.1	j	III:3745460-3759412	-	3	3749746;3754790;3755515	3749747;3754791;3755516	1;1;1	GCAGAAG;CCAGGAA;TCAGCCA
TCONS_00005701	XLOC_002218:F23C8.5	F23C8.5	0.667	0.391	-0.276	0.00805305	F23C8.5a.2	=	I:2415132-2421816	-	1	2418848	2418849	1	CCAGGTC
TCONS_00007982	XLOC_003059:zhp-3	zhp-3	0.348	0.068	-0.28	0.000183657	K02B12.8a.1	=	I:8513918-8531477	-	1	8530406	8530412	6	TAGTTGCAGAGC
TCONS_00050434	XLOC_022025	deb-1	0.837	0.555	-0.282	2.07461e-06	ZC477.9a.1	=	IV:7085215-7094370	-	1	7092524	7092526	2	TTTAGGTC
TCONS_00034757	XLOC_013247:Y4C6B.4	Y4C6B.4	0.497	0.213	-0.284	0.0119687	Y4C6B.4a.1	j	IV:5261912-5398591	+	1	5326437	5326444	7	AATGTTTCAGAAA
TCONS_00038162	XLOC_014945	epi-1	0.394	0.105	-0.29	4.70041e-06	K08C7.3f.1	=	IV:10666515-10681756	+	1	10677673	10677674	1	AAAGATG
TCONS_00004462	XLOC_001781:acox-1.1	acox-1.1	0.424	0.133	-0.292	0.00255065	F08A8.1c.1	j	I:12937919-12946717	+	1	12938555	12938561	6	CAGTTTTAGTAT
TCONS_00038956	XLOC_015309:ipmk-1	ipmk-1	0.587	0.292	-0.295	0.00035522	ZK795.1.1	j	IV:12541201-12563668	+	1	12548129	12548130	1	CCAGATA
TCONS_00071231	XLOC_032623:Y97E10AR.6	Y97E10AR.6	0.43	0.136	-0.295	0.000229913	Y97E10AR.6.1	j	V:8006166-8024940	-	2	8012292;8013950	8012293;8013951	1;1	TCAGAAA;CAGAGAA
TCONS_00076508	XLOC_034968	mlt-4	0.943	0.648	-0.295	0.0120941	ZC15.7.1	=	V:20281389-20289664	-	3	20283140;20286040;20287057	20283167;20286042;20287059	27;2;2	CAGCCAACTTCCATATTTCCATATTTCCAGGGT;TACAGATC;TTCAGATT
TCONS_00020659	XLOC_007985	fzr-1	0.472	0.173	-0.299	1.58807e-05	ZK1307.6.1	=	II:9636627-9646134	-	1	9641204	9641210	6	AAGCTTCAGGTA
TCONS_00014792	XLOC_005645	lec-3	0.609	0.308	-0.301	0.0205808	ZK892.1a.1	=	II:9962965-10006085	+	1	9994143	9994276	133	AAATTTCAACCAGTGATGTCCAATCTAACCATCAAGTTTTTGAGTGGCTCCCGATGTTTTTTGTGAAACCGAGAATTTCGGGAATAGCTCAAAAACAAATTCCAACAACTCAAGTTAATATTTCGTATTATTTCAGAAC
TCONS_00080951	XLOC_036944	ifa-1	0.439	0.136	-0.302	0.000182179	F38B2.1c.1	=	X:11160980-11392852	+	1	11273081	11273270	189	TTGACGCCCACCTAGTTTGCGCACCGTTGAGACTCCGCTTTTGTCTCTACAGTCAGCCTCCGACTAATTCCTTGGTCACACATTACGGCAGTCAGGGGTTGCCATACAACTCACAACCTCATTTTGAAATTTCGAAGCTGCCGAGTACAGTCGGCCCTTTTCACTTTCACAATAGAAATTTACGATTTGCAGCGA
TCONS_00019124	XLOC_007384	F13H8.8	0.424	0.121	-0.303	0.00444585	F13H8.8.1	j	II:6265611-6269997	-	3	6265809;6265968;6267532	6265810;6265969;6267534	1;1;2	TCAGAAA;GCAGGAT;TTCAGTTC
TCONS_00083985	XLOC_038254	acl-4	0.427	0.123	-0.304	1.34199e-06	F49H12.6a.1	=	X:2065037-2076178	-	1	2067205	2067214	9	CAGCTTCTTCAGATT
TCONS_00080345	XLOC_036690	F15G9.1	0.857	0.553	-0.305	0.00018568	F15G9.1a.1	=	X:9702239-9708563	+	1	9707328	9707362	34	GAATATACTCTTATTTAATAGCATATTTTTCATTCAGAAG
TCONS_00080877	XLOC_036914	apt-9	0.33	0.023	-0.307	0.0775779	W04G3.4.1	j	X:11068526-11072020	+	1	11071309	11071335	26	CAGGGAATCGCGTACCCATTGAAGTACTCTAC
TCONS_00061601	XLOC_028085	apx-1	0.76	0.451	-0.309	0.0158349	K08D9.3a.1	=	V:3209920-3223218	+	3	3211680;3212253;3215251	3212092;3212269;3215252	412;16;1	CCAGAAAAAACCAAAAAAAAAAAAAAAAAAAACGGCAGCCCTGCTTCAGAAAAGTCAAAATTACGAGAAACACTCAAAAATCTGAGAATGCGTATTGCACAACATATTTGACGCGCAAAATATCTCGTAGCGAAAACTACAGTATCCCCCCTTTAAATTACTACTGTAGCGCCGCTGGTGTCGATTTACGGGCTTAATTTTGATATCCGATCAAAAATCGGGCTCGTAAATCGACACAAGCGCTACAGTAGTCATTAACAGGATTACTGTAGTTTTCGGTACGACGAGATATTTTGCGCGCGTCAAATATGTTGTGCAGTACGCATTCTCAAAATTTTATGTTACCGTAATAAACATTCTAGAACCGTTTTAAAATTTTCGCGTTGTAAAAATCTGGAA…
TCONS_00002277	XLOC_000832:let-383	let-383	0.32	0.006	-0.314	0.00974067	T21G5.6.1	=	I:6862134-6872423	+	1	6868688	6868690	2	TTCAGGTC
TCONS_00060450	XLOC_027586	F11E6.8	0.334	0.017	-0.317	0.00153229	F11E6.8a.1	=	IV:17444124-17457483	-	4	17444836;17445644;17446610;17449707	17444837;17445646;17446611;17449708	1;2;1;1	TCAGTTA;TTTAGGTG;ACAGTAT;ACAGTTA
TCONS_00055137	XLOC_024220:tag-273	tag-273	0.683	0.366	-0.317	0.0222618	Y57G11A.1b.1	=	IV:14487085-14505175	-	1	14496488	14496659	171	GGGCGTTCGCCGGCGGTTCATTCTAGGCAGTTCACACCACATCATACTTATATCATCTATACGATCTATTGACTTGCCACCAATCGCCGCGATCCCGAAATTCCAATCCCTCAACTGGACACTAGCCAAAGAGAGAATAGAGAGAATTCATTATAATAAGAGAAATGGTTACAGCCG
TCONS_00021952	XLOC_008487	hphd-1	0.97	0.651	-0.319	0.00135321	Y38F1A.6.3	=	II:12994357-12996571	-	1	12996347	12996412	65	TCCATTCCACTTGTTTTCTTCTCTATTTCTCCACGTGTTTGTACATAAACGTGATAATAATTATTGTTGGC
TCONS_00007696	XLOC_002944	del-3	0.459	0.139	-0.32	0.0614329	F26A3.6.1	=	I:7422586-7723116	-	1	7671838	7671839	1	TCAGATG
TCONS_00025805	XLOC_009888	trp-1	0.464	0.142	-0.322	0.076724	ZC21.2a.1	=	III:8532896-8546594	+	2	8536745;8537837	8536820;8537895	75;58	GAGAAAAAGTCGTGTAAAAAGTTTAAAACACGCCCAATTATTACATGGTTACTACATATTGTCTAATAATCTGTTTAGGTT;CAGCTCAACTAAATTCCCTGAACACATATTATTAAACTTAATCAAACTTATCAATTTTCAGTTT
TCONS_00026538	XLOC_010190:D2045.9	D2045.9	0.347	0.022	-0.324	0.0969684	D2045.9.1	=	III:10471236-10483926	+	1	10475960	10475970	10	AAAAAGTTTCCAGAAT
TCONS_00020725	XLOC_008009:ZK1321.4	ZK1321.4	0.568	0.241	-0.327	4.41382e-06	ZK1321.4b.1	=	II:9770758-9782495	-	1	9771972	9771974	2	TTCAGCTC
TCONS_00015362	XLOC_005926:kin-6	kin-6	0.587	0.259	-0.328	0.00242552	ZK20.2.1	j	II:11612256-11642611	+	1	11638963	11640341	1378	AAGGGCAAACGACAATTGGGATATAAAATGTCAAAGTTGAACAATTGGGCAAGATGCTAATAGAGGAAATGCGTTATTAAATGAGGAGAATCGTCAGTAAGAAAATTGTTTAAAAGCCGCTCATATAGTTCTGAAGTGTTCCAATAAAATTACAGAAATTTTCTGAAAATTTTGAAAATTTTTCATTTACAATCAAACGTGGTAAAAACTCCTTTTTCGCCTATAAAAACTTTGGAAGTAGACCAAAAAAATTCTTACTAGTTGCATACTTAGCGTTGTAAGGGTCGAACCTGTAGAAGTTTGGCAATATCCCAAGAAAATTTGACAATTTTTTTGGTTAGCATTTGTGTTGATATCTTATACTCAAAAGTTAATCAAAGTGGATTGAATTAATCGAAA…
TCONS_00084936	XLOC_038652	lst-2	0.331	0	-0.331	1.72819e-10	R160.7.1	j	X:4378003-4383371	-	2	4379282;4382139	4379290;4382140	8;1	TAGTTTATCCAGGT;TCAGCAA
TCONS_00060990	XLOC_027802	C39F7.1	0.49	0.158	-0.332	0.0683031	C39F7.1b.1	=	V:1258239-1264489	+	1	1261814	1261820	6	CAGTTTCAGTCT
TCONS_00029663	XLOC_011172	pqn-25	0.332	0	-0.332	0.000136014	D1044.3.1	j	III:5506757-5512602	-	2	5509795;5510893	5509797;5510894	2;1	TTAAGGTG;CCAGCCG
TCONS_00089782	XLOC_040684	F43B10.1	0.478	0.145	-0.332	0.00394598	F43B10.1b.1	=	X:16638225-16663111	-	1	16640910	16640911	1	ATAGTGT
TCONS_00022228	XLOC_008594	zip-3	0.428	0.096	-0.332	0.079208	W07G1.3.1	=	II:13946738-13957543	-	1	13955990	13955992	2	TCCAGTGA
TCONS_00058086	XLOC_026081:sams-2	sams-2	0.405	0.069	-0.336	0.0934704	Y105C5B.12	j	IV:15936921-15947439	-	1	15943816	15943817	1	ACAGAAA
TCONS_00024513	XLOC_009434	F09F7.5	0.342	0.004	-0.338	2.78629e-11	F09F7.5a.2	=	III:5512926-5603756	+	1	5547068	5547110	42	ACCATTGATTTTTTTTGCCTCTTGTTACTTTATTCTTGATTTAAGACA
TCONS_00016652	XLOC_006415:mps-2	mps-2	0.41	0.071	-0.339	0.0105066	K01A2.8d.1	=	II:293070-318665	-	1	310443	310456	13	CAGAAGTTTTTTTCAGAAA
TCONS_00027706	XLOC_010544:toca-2	toca-2	0.355	0.013	-0.342	1.15404e-14	K08E3.3a.1	=	III:13752405-13759434	+	1	13759285	13759291	6	AAGTTGCAGGAA
TCONS_00073665	XLOC_033747	odr-3	0.354	0.011	-0.343	0.00350274	C34D1.3.1	j	V:13246374-13249542	-	3	13247303;13248215;13248560	13247304;13248216;13248561	1;1;1	TTTCAGA;TCAGTGT;TCAGTTT
TCONS_00069603	XLOC_031864:ugt-32	ugt-32	0.95	0.596	-0.354	0.000480479	F47C10.6.1	=	V:3841826-3848463	-	1	3843725	3843726	1	TTAGCAA
TCONS_00022074	XLOC_008527	tbc-14	0.51	0.155	-0.355	0.00391705	E01G4.1b.1	=	II:13437578-13448198	-	1	13440909	13440911	2	TCCAGAAA
TCONS_00082089	XLOC_037477	jmjd-3.2	0.886	0.53	-0.356	0.0278733	F23D12.5.1	j	X:14447671-14453885	+	1	14448774	14448905	131	TAGGGGTCGCAACATGCGGCATTTCTTTAAATTTCCTCAAAAGCTAGTAGATTCTCCAATTGTCAGCACAAATGATTCTGAACCAATTAATGAACAAGTTTATTCAACACAAAGTAATCATGGCGAGCTTCAAGATA
TCONS_00022030	XLOC_008509	W09H1.1	0.369	0.012	-0.358	0.0177523	W09H1.1a.1	j	II:13175856-13182463	-	1	13176836	13176842	6	TAGTTCCAGACG
TCONS_00031748	XLOC_011984:Y39A1A.21	Y39A1A.21	0.679	0.321	-0.358	0.00141006	Y39A1A.21a.1	=	III:10700651-10707173	-	1	10701715	10701717	2	TTCAGATT
TCONS_00068888	XLOC_031511	F36H9.5	0.361	0	-0.361	0.00254829	F36H9.5.1	j	V:1779631-1782022	-	2	1780976;1781155	1780977;1781157	1;2	TCAGAAA;TTCAGACC
TCONS_00012209	XLOC_004608:sea-2	sea-2	0.362	0	-0.362	7.0937e-11	K10G6.3g.1	j	II:3936272-3975039	+	1	3950145	3950173	28	AATTTCACCTTTTTTCAAATTTTTTCACAAGTCT
TCONS_00067578	XLOC_030963	Y51A2D.21	0.851	0.481	-0.37	0.00822678	Y51A2D.21.1	j	V:18571056-18573026	+	1	18571833	18571835	2	TTCAGATT
TCONS_00070588	XLOC_032318:dpy-11	dpy-11	0.785	0.412	-0.372	0.00167961	F46E10.9.2	j	V:6511587-6519409	-	1	6513346	6513348	2	TCCAGAAT
TCONS_00000462	XLOC_000147	Y73E7A.3	0.615	0.242	-0.373	0.0629198	Y73E7A.3c.1	=	I:1581393-1594390	+	1	1592347	1592348	1	GCAGTTC
TCONS_00068555	XLOC_031382	fbxa-72	0.931	0.558	-0.373	0.0404394	F31F4.15a.1	j	V:674889-687559	-	1	676501	676509	8	CAGATTTTCAGATA
TCONS_00024896	XLOC_009553	gar-2	0.534	0.145	-0.388	0.0849621	F47D12.1a.1	o	III:6309377-6320872	+	1	6320319	6320323	4	CAGGAATACA
TCONS_00015831	XLOC_006116	F42G4.5	0.938	0.546	-0.392	0.0905181	F42G4.5b.1	=	II:13073492-13076223	+	1	13073669	13073769	100	AAAATGTCTCCTCCTCTTCCCCACTGTTTAAGCCGATTGCTGAAATTGAATCGGTTTCCCATTCCCAGTCATTCTTTCTTTATGAGTTTTCTTACCGTTCCAGGTG
TCONS_00019242	XLOC_007441:abch-1	abch-1	0.889	0.496	-0.393	0.0992963	C56E6.5.1	j	II:6502980-6535455	-	1	6527534	6527535	1	ACAGATA
TCONS_00006808	XLOC_002608:F27C1.11	F27C1.11	0.461	0.068	-0.393	0.00385911	F27C1.11.1	j	I:5433431-5446873	-	7	5434300;5434421;5436253;5440005;5440713;5441381;5441883	5434306;5434422;5436255;5440006;5440714;5441382;5441976	6;1;2;1;1;1;93	AACTTTCAGCCC;TCAGGCA;TCTAGATG;TCAGGAG;GTAGCAA;TTAGACA;CAGAAATTTTTGAAAAAAAAAACTACCAAAAAAAAGCATTTTACACTTGTTCCAAAGCTTCTAATTTTTAATGTTAATTATTTTTATCGAATTCAGATT
TCONS_00031700	XLOC_011968:T21C12.8	T21C12.8	0.46	0.066	-0.394	0.000561516	T21C12.8a.1	j	III:10551074-10565809	-	1	10552282	10552283	1	TCAGAAG
TCONS_00007822	XLOC_003006	lin-10	0.824	0.429	-0.395	0.00688808	C09H6.2a.1	=	I:8109745-8130091	-	1	8118517	8118519	2	TACAGAAA
TCONS_00085432	XLOC_038850:set-20	set-20	0.439	0.042	-0.397	0.0174803	W01C8.4b.1	j	X:5674950-5686170	-	3	5676077;5682232;5684621	5676083;5682304;5684623	6;72;2	CAATTTCAGATT;CAGACGGCTGAGAATGATGCAGAAAAACGTTCATTAAAATCAACAATTGTGGCAATAAATAAACTAATTTTTCAGTTG;TTCAGCAG
TCONS_00022314	XLOC_008632:W03H9.1	W03H9.1	0.811	0.412	-0.399	0.0117935	W03H9.1.1	j	II:14142768-14150576	-	1	14147988	14148963	975	CAGATGAAGTCACTTTATGCCTTCAGGCTGACAAGGGATCACTAGAAACTAAGATTTGCGTTGCTATAGAAAACGTCCAAAATCCATCAATTCCCCACAATCTGTTGTTGGTTGCTATGTACGAAGGAAGTGACAGTGAAGATGAATTGCGAGAGAATGCATTGAGTGTTTTTCAAATGTGGAACGATATAACAGAGATTAACTACACTTCAAAAAACGGAAAACAAAAAACAAAAAAGGTGGTTTTGAAGTTCATAGGAGATCTGAAAATAATTTCGGCAGTGCTGGGGCACCGAGGGCAATCATGTTCCAATCCATGTTACTTGTGCGAATTAGTTTCGACTAACTCAGGACCAAGAGCGCAGTATCTAAAAGATGTTGATTTCCGTGTACAAGCAG…
TCONS_00008929	XLOC_003387	che-13	0.423	0.022	-0.401	0.0142967	F59C6.7a.1	j	I:10506999-10515874	-	1	10515213	10515214	1	TCAGGCA
TCONS_00038265	XLOC_014994:ZK593.9	ZK593.9	0.919	0.518	-0.402	0.0133911	ZK593.9	j	IV:10940044-10943195	+	1	10941135	10941142	7	CAGAGAACAGTTG
TCONS_00018365	XLOC_007052	ntl-2	0.583	0.172	-0.411	0.0167696	B0286.4b.1	=	II:4372739-4386343	-	1	4374698	4374699	1	TCAGCTA
TCONS_00025654	XLOC_009836:fbxl-1	fbxl-1	0.658	0.243	-0.415	5.835e-05	C02F5.7a.3	j	III:8226477-8235543	+	1	8229286	8229790	504	GGTGGCCAGGTGTTCTGTTTAGTGTCAGATTCATTCTCAACCTTTATCGATGTCTTTATTGGTTACGCTTCTGGTTTCTGGGTAACCACCGCTCTCACTGAAGTTCGTTCTGTTTTGCTCGCAGATATTTCAAAACTTCACTGCCAATGACGGAAAAAATATTTTAATGAAATTTTATAATATGTCCCATTTTGACACTGTTGTAAATAGAAAATTTCTGAAAATATTCAAATTTTCTTCGTTTTCGTGGCAAATCTTAAATATTTATCATCTCCTAAATATGTGAGCTAATTGGATTTTTTGAATAAGAGACTAATGAATGATTATATCTGTGCATCCTATTTTTCATCGAATTTCCGCTCTGACGTCAGTAACTGCAGTAAACACGCTCACTTTTCC…
TCONS_00081430	XLOC_037169	ugt-50	0.476	0.053	-0.423	7.22019e-10	T07C5.1c.1	=	X:12691572-12702063	+	1	12691916	12692182	266	AATACACGTCTTCTTCTTTTTCACCCTTTTCTTAGTCCCACAATTTTCTTTTCACCCTCAGCTTTACATTCTCCGCAATCCGATTCGGCAGATGGCTTGAAAAGCCACGCCCATCATTATGAGAAGGGGGAGGAGCCAACTCGTTCCATGTAGACGGACCCCCAATTCAGCTCAGTCTTGTTCCACATACACCCCACTGGTCGGTTGCCCTCTCCTCCTCCTTCTCTCCCTCCACTGCCGCCTGTCAACCAGTCATCTAGCAATTGTAGGTG
TCONS_00078656	XLOC_035930	T22B7.3	0.882	0.459	-0.423	0.0102043	T22B7.3.1	j	X:5642856-5650213	+	1	5647378	5647380	2	TACAGAAT
TCONS_00028320	XLOC_010722	Y22D7AL.11	0.433	0	-0.433	0.00343576	Y22D7AL.11.1	=	III:1626631-1637561	-	1	1631682	1631683	1	TCAGGTG
TCONS_00076088	XLOC_034834	F21D9.2	0.546	0.106	-0.44	0.0830304	F21D9.2.1	=	V:19258233-19262522	-	1	19259353	19259354	1	TCAGAAT
TCONS_00030062	XLOC_011312:atgl-1	atgl-1	0.786	0.344	-0.442	0.0275636	C05D11.7a.2	j	III:6406908-6431855	-	1	6424903	6424904	1	TCAGTCA
TCONS_00022728	XLOC_008791:klp-20	klp-20	0.479	0.033	-0.445	0.0571212	Y50D7A.6.3	j	III:194459-254067	+	1	209992	209994	2	TTCAGAAC
TCONS_00029836	XLOC_011237	dnc-2	0.585	0.139	-0.446	0.0200493	C28H8.12.1	=	III:5923186-5925756	-	1	5924989	5924990	1	TGAGATG
TCONS_00046978	XLOC_020202	Y41D4B.24	0.984	0.536	-0.448	0.0999387	Y41D4B.24.1	=	IV:1676656-1682227	-	1	1679050	1679052	2	TTCAGGCA
TCONS_00006864	XLOC_002618:zipt-11	zipt-11	0.723	0.274	-0.449	3.7933e-05	F59A3.4.1	j	I:5497678-5511705	-	1	5509170	5509172	2	TTCAGCAT
TCONS_00088990	XLOC_040302	K04G11.3	0.484	0.025	-0.459	0.00747223	K04G11.3.1	j	X:14345337-14349778	-	4	14346008;14346251;14346899;14347598	14346009;14346252;14346900;14347650	1;1;1;52	CTAGTCG;TCAGTTT;TCAGAAA;GCTAGAAATATCACTTTTAAATAAACTATATTTATATTATTTATTTGTATTTCAGTTT
TCONS_00069764	XLOC_031947:nhr-125	nhr-125	0.512	0.046	-0.467	3.64559e-06	R02D1.1a.1	j	V:4320362-4325623	-	3	4321013;4322766;4324739	4321014;4322773;4324741	1;7;2	TCAGATC;TAGTTTTCAGATA;TTCAGAGT
TCONS_00003502	XLOC_001352	lin-11	0.551	0.075	-0.476	0.00364399	ZC247.3.1	j	I:10248163-10255327	+	1	10248778	10248783	5	CAGATATGTAT
TCONS_00033455	XLOC_012592	smf-3	0.748	0.269	-0.479	0.0232748	Y69A2AR.4.1	j	IV:2618862-2625622	+	1	2619875	2619877	2	TTCAGATA
TCONS_00016702	XLOC_006431:C24H12.6	C24H12.6	0.999	0.515	-0.484	0.0268749	C24H12.6.1	j	II:416838-453397	-	1	422529	422530	1	TCAGCAC
TCONS_00083407	XLOC_038037:R04A9.9	R04A9.9	0.77	0.285	-0.485	0.0464958	R04A9.9a.1	j	X:389321-400713	-	2	390262;390549	390264;390551	2;2	TTCAGAAA;TTCAGACT
TCONS_00014081	XLOC_005366	col-76	0.634	0.147	-0.487	0.0225901	M110.1.1	j	II:8204331-8212784	+	1	8206055	8206057	2	CAGAGACG
TCONS_00087877	XLOC_039832:F46C3.2	F46C3.2	0.489	0	-0.489	2.93458e-08	F46C3.2.1	=	X:11416647-11420076	-	1	11418208	11418209	1	GCAGCAT
TCONS_00052296	XLOC_022770:fbxb-79	fbxb-79	0.507	0.017	-0.49	0.0561294	R07H5.7.1	o	IV:11188610-11197828	-	1	11191025	11192027	1002	TGGATGACCCCACTAAAGAATAACTGTTAAAATAATGCAATTTTATAATTACTTAGCTGATAAAAATGAGAAAATAAGATAAAACTGAGAAAATAGTATAAAACGTCGACTTTCACGATTTCAGTTGAAAATGACAAAAAAACCGGAAATTGTTGAAAATAAAAAAAAACCAATGAAAATGTGAAAATCAGTCATTGAAAGTAACGCAGACATAAGAGACATTCGAAATTAGAAAAGAGAACGAAATGTGTAGCTGTTGGAAAAATACAAAAAAAAATGTTATGAAAGAAAGATTGAAGCAATAGTCTTAAGATACATGAAACAACGCGAAATGGACTTTTAAATTTGTAGAAATTAAAAGATAGTTCCGAATTCTTACAAAATGCAACAAAAAATGGA…
TCONS_00077814	XLOC_035525	ZK563.2	0.781	0.286	-0.495	0.0715961	ZK563.2.1	j	X:3368745-3375044	+	1	3371765	3371769	4	TTTTCAGAAA
TCONS_00000776	XLOC_000240	dmsr-2	0.5	0	-0.5	0.00324208	Y23H5B.4.1	j	I:2533218-2542114	+	1	2541578	2541580	2	TCCAGAGA
TCONS_00073979	XLOC_033851	T26F2.2	0.775	0.261	-0.514	0.000102964	T26F2.2	=	V:13981262-13983241	-	3	13981792;13981983;13982551	13981793;13981984;13982552	1;1;1	CTAGGTC;ACAGAAA;TAAGGTG
TCONS_00000754	XLOC_000233:F23C8.1	F23C8.1	0.535	0.012	-0.523	0.000211985	F23C8.1	j	I:2436422-2448996	+	1	2446572	2446574	2	TTTAGAGA
TCONS_00012093	XLOC_004557:F19B10.4	F19B10.4	0.778	0.251	-0.527	0.0605771	F19B10.4.1	j	II:3658668-3663244	+	1	3660232	3660233	1	CAGAACT
TCONS_00030858	XLOC_011639	glr-1	0.867	0.339	-0.528	0.000726981	C06E1.4.1	=	III:8584172-8588859	-	2	8584595;8587672	8584596;8587673	1;1	TCAGAAA;CTAGCAA
TCONS_00089408	XLOC_040489	glb-28	0.898	0.367	-0.532	0.0605771	Y15E3A.2.1	=	X:15305387-15317246	-	2	15315256;15315617	15315257;15315619	1;2	TCAGTGG;TTCAGGCG
TCONS_00009848	XLOC_003775:M01E5.2	M01E5.2	0.551	0.018	-0.533	3.66183e-05	M01E5.2.2	=	I:13276955-13286989	-	2	13278501;13278875	13278502;13278877	1;2	TCAGCTA;TTTAGATG
TCONS_00040349	XLOC_016025:ins-34	ins-34	0.75	0.215	-0.535	0.00375025	F52B11.6.1	j	IV:14102094-14107715	+	1	14106584	14106586	2	TTCAGATG
TCONS_00012153	XLOC_004588	Y8A9A.2	0.857	0.32	-0.537	0.00214113	Y8A9A.2.1	=	II:3795374-3800831	+	1	3795782	3795794	12	CAGAGAAGCTTCGAGCGT
TCONS_00019648	XLOC_007599:kcc-3	kcc-3	0.57	0.028	-0.541	0.0203237	K02A2.3b.1	j	II:7425868-7437995	-	6	7426414;7427964;7428136;7429243;7429415;7430336	7426421;7427965;7428138;7429244;7429416;7430337	7;1;2;1;1;1	AAATTTCCAGAAG;TCAGAGC;TTCAGGAC;TCAGTCT;TCAGAGT;TTAGGTC
TCONS_00019577	XLOC_007575	aqp-1	0.671	0.128	-0.543	3.64559e-06	F32A5.5a.1	j	II:7232852-7238349	-	1	7237038	7237101	63	TTTGATAATCAGCAGAAACCCTTCTGTTACGAGCAGTCTGCACCCTATCAATCTAACAACATTTCAGAA
TCONS_00017186	XLOC_006612:bath-33	bath-33	0.556	0	-0.556	0.00828234	C08E3.3.1	=	II:1601763-1607766	-	1	1605054	1605055	1	TCAGTTC
TCONS_00031890	XLOC_012042:elo-8	elo-8	0.609	0.047	-0.561	0.0131121	Y47D3A.30a.1	=	III:11228905-11235419	-	3	11231783;11231969;11232077	11231784;11231972;11232078	1;3;1	GTAGGTA;TTTCAGTTC;TTTATTT
TCONS_00037749	XLOC_014756:sdz-36	sdz-36	0.888	0.324	-0.564	0.0346248	ZK1251.7.1	o	IV:9687048-9691897	+	1	9690862	9690934	72	TAGAATATAGCTAAAATCGTTTTTATTGAGTGTTGCGTCTACCGTGTTGAAATCGTACATTTTTCCATACTTCAGAGC
TCONS_00032337	XLOC_012193:Y37D8A.5	Y37D8A.5	0.566	0.001	-0.565	4.73347e-08	Y37D8A.5.1	j	III:12853892-12870305	-	1	12869526	12869532	6	CAATTTCAGACG
TCONS_00020581	XLOC_007943:R09D1.12	R09D1.12	0.667	0.097	-0.569	0.0625297	R09D1.12.1	=	II:9448272-9452282	-	2	9451240;9451435	9451241;9451437	1;2	TCAGGGA;TGAAGAGA
TCONS_00047266	XLOC_020306	clec-83	0.619	0.043	-0.576	0.0657693	Y54G2A.14.2	=	IV:2835663-2841434	-	1	2840685	2840781	96	GTTCCACCTGCCGCATTGCTGTCTTAATATCTCATGCCTACCTACCTCCTCTCTGCCTCCCTTCTAACTGTATCACACCAAAATTTTAAACTTTTTCAGATG
TCONS_00017695	XLOC_006775	F22E5.13	0.802	0.219	-0.582	0.0139809	F22E5.13.1	=	II:2647324-2654985	-	2	2648590;2648802	2648636;2648803	46;1	GTCAGTTTTTTGCTAAAAAGTATAACAATAATTAAAAAATATAATTCAGAAT;TCAGAAC
TCONS_00061065	XLOC_027840:cdc-25.2	cdc-25.2	0.779	0.197	-0.583	0.00300953	F16B4.8d	j	V:1567072-1586080	+	1	1583338	1583340	2	CAGACGAG
TCONS_00037902	XLOC_014832	frk-1	0.652	0.057	-0.595	0.0398068	T04B2.2b	=	IV:10043181-10045739	+	1	10043969	10044233	264	TTTTGAGCACAAATGTTGGTTATTACTCGTTACATCAGAAAACTTAATTCTGGATTTTTCCTTGCAATCTTATTCTATGATACAGTTTTGAATTTGAAAGAGAAACAAACACGTCAATGTTAAAATGTGAAAACATAAAAAACAAGTAATTCACGGGAAATGAACAACTTTCCAGTTGTTATAAGCGGTGAACTTCAAAATTTTATATAAACGTGGAAAGATAAATGAACTCTGAACTTTATTACCAACATCTCGTTGTGTTTTCAGACT
TCONS_00087168	XLOC_039587:slc-17.9	slc-17.9	0.739	0.141	-0.599	0.00914004	T09B9.2.1	j	X:9761482-9776066	-	1	9763655	9763657	2	TTCAGAGT
TCONS_00073259	XLOC_033558	gcy-13	0.622	0.021	-0.601	0.0775779	F23H12.6.1	j	V:12358646-12369672	-	1	12364314	12364316	2	TCCAGGTA
TCONS_00021987	XLOC_008496	F42G4.7	0.83	0.226	-0.604	0.000125428	F42G4.7.1	j	II:13043926-13050827	-	1	13047285	13047287	2	TTTAGGTT
TCONS_00029813	XLOC_011233	pxl-1	0.672	0.066	-0.606	4.87424e-12	C28H8.6a.1	j	III:5889720-5901669	-	1	5894130	5894292	162	AGAGAAAAGGAGCAGCACACCTTTTTCTTTTCCACGCACACAACACTTTTACCTATCACTTGGCGGAATGATGCGCGAGTTGCAACAACGGCTTGACCATTTCAATGGTCCAAATTATGCACAAAATAGTCATTCAAACCACCAACAACATCATTCGGTTTATAGCTC
TCONS_00070489	XLOC_032269	srn-1	0.759	0.145	-0.614	0.0987137	K12B6.5.1	=	V:6284896-6286443	-	2	6285076;6286208	6285077;6286209	1;1	TCAGCTT;TCAGATT
TCONS_00084527	XLOC_038457	sul-1	0.892	0.27	-0.623	0.00867813	K09C4.8.1	=	X:3264521-3270906	-	1	3270452	3270453	1	GTAGCTA
TCONS_00078062	XLOC_035646	R02E4.2	0.748	0.098	-0.651	0.000743823	R02E4.2.1	j	X:4106944-4111595	+	2	4108395;4109585	4108400;4109586	5;1	CAGAGCTTGAC;TTAGGCC
TCONS_00072612	XLOC_033246	lact-8	0.923	0.272	-0.651	0.00173962	Y42A5A.2b.1	=	V:11087691-11097970	-	2	11092652;11093036	11092653;11093038	1;2	ACAGCGC;TTCAGACA
TCONS_00069863	XLOC_031975	gnrr-5	0.678	0.003	-0.674	0.000738235	H22D07.1.1	j	V:4451021-4459382	-	1	4452045	4452206	161	TAGATCAAAACATAGTGGGACAGCCTGGCACCACCACGTTCCTCCTTTGAAGTCGTAGAGATGGAAAAAATACACACTACCACCGTTTAATTGGCAGAGACCAACAAACGTTGAACTAAAAAAATATATAATTAATTGACAAAAATGATTATTTCAAATTTCAGACA
TCONS_00051891	XLOC_022619:R09E10.5	R09E10.5	1	0.308	-0.692	0.0393954	R09E10.5.1	=	IV:10294443-10302372	-	1	10299539	10299540	1	CTAGATG
TCONS_00020556	XLOC_007931	M176.9	0.935	0.234	-0.7	0.0642954	M176.9b.1	=	II:9409201-9414380	-	1	9410896	9410931	35	CAGACTCATTGCTTCTATCAATGGCAGGCTCATTGCAGGCA
TCONS_00030093	XLOC_011324	acr-5	0.757	0.055	-0.702	0.0746179	K03F8.2.1	j	III:6508131-6514776	-	2	6510922;6512362	6510923;6512363	1;1	TCAGCAC;TTAGATA
TCONS_00052436	XLOC_022834	M04B2.7	0.703	0	-0.703	0.000200398	M04B2.7f.1	=	IV:11524234-11548586	-	1	11532029	11532035	6	CAGTTTCAGATT
TCONS_00000996	XLOC_000337	fog-1	0.777	0.069	-0.707	0.000378105	Y54E10A.4b.1	j	I:3211045-3228478	+	1	3212990	3212994	4	CAGATGGAAA
TCONS_00061316	XLOC_027938	Y5H2B.3	0.897	0.187	-0.71	3.10715e-09	Y5H2B.3.1	o	V:2188159-2189062	+	1	2188280	2188282	2	TTCAGACT
TCONS_00063330	XLOC_028887	F20D6.5	0.814	0.011	-0.803	8.78185e-12	F20D6.5.1	j	V:8161943-8183442	+	1	8163549	8163550	1	CAGCAAT
TCONS_00033542	XLOC_012620:Y54G2A.45	Y54G2A.45	0.878	0.067	-0.811	0.000672713	Y54G2A.45a.2	=	IV:2805339-2812848	+	1	2807848	2807855	7	AAGTTTACAGTTT
TCONS_00027780	XLOC_010573:F40G9.9	F40G9.9	0.861	0.004	-0.857	3.52762e-09	F40G9.9.1	=	III:170219-184915	-	1	171521	171525	4	TTTTCAGAAA
TCONS_00027029	XLOC_010343	srd-74	0.962	0.016	-0.946	0.0958067	C24H11.4.1	j	III:11782111-11786150	+	1	11782817	11782819	2	CAGAATCA

## Sheet: daf-2_d4_vs_daf-2_d1
Supplemental Table S3. A3 isoforms that were differentially regulated in wild-type and daf-2 mutant animals in old age compared with those at day 1 of adulthood
Supplemental A3 isoforms differentially regulated in daf-2 mutant animals at day 4 of adulthood compared with day 1 of adulthood
Isoform_ID: Detected isoform, Gene_ID and Gene_name: A gene contains the isoform, Young: Isoform fraction in young samples, Old: Isoform fraction in old samples, Difference: Old - Young, q_value: Significance of the difference
Nearest_reference_ID: A reference isoform which is the most similar to the detected isoform, Class_code: The type of match between the detected isoform and the reference isoform, A3: The number of A3 in the isoform
Class_code, =: Complete match, j: Potentially novel isoform, o: Generic exonic overlap with a reference, x: Exonic overlap with a reference on the opposite strand, s: Intronic overlaps with a reference intron on the opposite strand
Isoform_ID	Gene_ID	Gene_name	Young	Old	Difference	q_value	Nearest_reference_ID	Class_code	Locus	Strand	A3	A3_genomic_start	A3_genomic_end	Distance_between_adjacent_3′_splice_sites_of_A3	Sequence_between_adjacent_3′_splice_sites_of_A3
TCONS_00022297	XLOC_008629	K09E4.4	0.069	0.902	0.832	6.53e-08	K09E4.4.1	=	II:14114185-14123029	-	5	14115903;14116758;14117390;14117549;14117696	14115904;14116759;14117391;14117550;14117697	1;1;1;1;1	ACAGGGT;TCAGACG;TCAGAAT;ACAGACC;CCAGCTC
TCONS_00071709	XLOC_032854:lron-2	lron-2	0.001	0.787	0.786	0.003798	ZK682.5.2	=	V:9284128-9288024	-	1	9285745	9285746	1	ACAGTTA
TCONS_00015973	XLOC_006160	Y48E1B.8	0.185	0.938	0.753	5.7e-11	Y48E1B.8.1	j	II:13585012-13589033	+	1	13587169	13587174	5	CAGAAACCCTT
TCONS_00029501	XLOC_011120	C45G9.11	0	0.744	0.744	0.014016	C45G9.11.1	=	III:5062705-5068725	-	1	5065098	5065099	1	TCAGATC
TCONS_00002308	XLOC_000849	H06O01.4	0.174	0.913	0.74	0.02525	H06O01.4	s	I:7001990-7005189	-	1	7003219	7003235	16	GCTCCTGTCAAGGTTGGTAACT
TCONS_00086880	XLOC_039442	M02D8.7	0.283	0.994	0.711	0.07315	M02D8.7.1	j	X:8738869-8743489	-	1	8742990	8743057	67	CTCATTTTCATTTTCGTATTTCTGTGTGATAAATTTCATAAAACACATACCACGATTCCATTTTTTTTAGAAA
TCONS_00054317	XLOC_023716:col-133	col-133	0	0.7	0.7	0.000771	F52B11.4.1	j	IV:14098285-14101597	-	1	14099354	14099545	191	TAGATAAAATCTACTTTCCTTTGGATTCAAAAAAAAATCGACCTTCAGAGAATCTTTGTCATGTTCATAAAGCAGTGATTTTTTTTTAATTCCCTTTTTTGTTCCTTGTTACAACCGTTCGCGCGTATTACACTCATCAATTTGTGTAGTATAAAAGGATCAGGTTGATTGCAGAAGAACATCATCTTATTTAGAAA
TCONS_00082044	XLOC_037455:prx-1	prx-1	0.111	0.771	0.659	1.5e-08	C11H1.4a.1	=	X:14313720-14330195	+	1	14321799	14321801	2	TTCAGGAA
TCONS_00078864	XLOC_036032	ggr-2	0.222	0.865	0.643	0.072548	C45B2.4a.1	j	X:6070496-6081860	+	1	6075509	6075580	71	CTTCTATTGCTATGAAGCTCTCGCCTATCTCACTTTAATGTTTTTCGAAGTCCGACTGTGAATTCAATCTTCAGAGG
TCONS_00065740	XLOC_030025	F09F3.8	0.001	0.634	0.634	0.030118	F09F3.8	j	V:13869763-13872619	+	1	13870541	13870552	11	CAGGAAGATCACAGATA
TCONS_00086180	XLOC_039165	K03A1.4	0.236	0.836	0.6	0.089644	K03A1.4a.1	j	X:7272305-7299901	-	1	7296507	7296509	2	TTCAGGAC
TCONS_00083690	XLOC_038122	mksr-1	0	0.6	0.6	0.077398	K03E6.4.1	j	X:1066608-1071414	-	1	1069052	1069119	67	CAGATGTTCCCTTGGCAACCTAGAGACTAGTTTACGTAACGCTTCTCACAATTTTGACATTGATTGTCAGTTT
TCONS_00029836	XLOC_011237	dnc-2	0.119	0.709	0.589	0.001618	C28H8.12.1	=	III:5923186-5925756	-	1	5924989	5924990	1	TGAGATG
TCONS_00063226	XLOC_028846:F40A3.3	F40A3.3	0.011	0.595	0.585	6.39e-10	F40A3.3c.1	j	V:7877489-7881403	+	1	7877776	7877781	5	CAGAGGTCTCG
TCONS_00070352	XLOC_032210	M03F8.5	0.294	0.876	0.582	0.08363	M03F8.5.1	j	V:5930842-5936855	-	1	5934539	5934541	2	TTCAGAAG
TCONS_00079006	XLOC_036105:C03B1.2	C03B1.2	0.31	0.879	0.57	0.091863	C03B1.2.1	j	X:6367042-6375836	+	1	6372428	6372473	45	TAGAAAAATATCCAGTTATATATGACCTCATAACAATTCAAATTTCAGATT
TCONS_00009366	XLOC_003584	F35E2.5	0.369	0.932	0.563	0.025765	F35E2.5.1	j	I:11707817-11923919	-	1	11742385	11742391	6	TAGTTTCAGTTC
TCONS_00017693	XLOC_006775	F22E5.13	0.106	0.648	0.542	0.046095	F22E5.13.2	j	II:2647324-2654985	-	2	2648590;2648802	2648636;2648803	46;1	GTCAGTTTTTTGCTAAAAAGTATAACAATAATTAAAAAATATAATTCAGAAT;TCAGAAC
TCONS_00020995	XLOC_008110:clec-60	clec-60	0.353	0.891	0.537	0.000605	ZK666.6.1	j	II:10479919-10482228	-	1	10481633	10481639	6	TTATTTCAGCGT
TCONS_00050639	XLOC_022111	F13B6.3	0.454	0.973	0.519	0.067363	F13B6.3.1	j	IV:7461965-7466218	-	4	7462284;7462649;7465431;7465966	7462289;7462651;7465432;7465972	5;2;1;6	TTTTTCAGACC;TTTAGTTA;TTAGATA;ATATTTTAGCTT
TCONS_00088424	XLOC_040078:C05E7.1	C05E7.1	0.295	0.8	0.505	0.058972	C05E7.1.1	j	X:12906035-12968731	-	1	12941990	12941991	1	TCAGGAA
TCONS_00076085	XLOC_034834	F21D9.2	0.053	0.558	0.505	0.04714	F21D9.2.1	j	V:19258233-19262522	-	1	19259353	19259354	1	TCAGAAT
TCONS_00070980	XLOC_032490	nhr-263	0.02	0.511	0.491	0.018089	F10G2.9.1	j	V:7340287-7345234	-	2	7340701;7341048	7340823;7341049	122;1	AAATTGCTCAATGGTGATTTTTCAGTAGAACTGATGCCTTCTGCTCAAGATTTTGAGCAGTACCTTTAAGATGAAACGTACATTATTTGTTTTACACTCTTCATTTTTTGATATCATAATTTCAGATG;TCAGGAA
TCONS_00030975	XLOC_011683	F44E2.4	0.164	0.649	0.485	0.008221	F44E2.4.1	j	III:8832400-8838424	-	2	8835019;8837240	8835022;8837241	3;1	TTTCAGATG;TCAGCAA
TCONS_00046534	XLOC_020054	Y38C1AA.9	0.178	0.663	0.485	0.005361	Y38C1AA.9.1	=	IV:156064-170966	-	1	157159	157162	3	ATTTAGATG
TCONS_00046508	XLOC_020051	col-99	0	0.482	0.482	0.02561	F29C4.8b.1	j	IV:138298-154259	-	1	144886	144887	1	CCAGATA
TCONS_00025823	XLOC_009894	C02D5.2	0.393	0.871	0.477	1.07e-06	C02D5.2a.1	j	III:8556469-8559194	+	2	8557358;8557924	8557435;8557925	77;1	GAGTCACCCCTCTCCACTCATTTGCCGCCCAATTTTGACGTTTTCTTCCTTGCACATTTTGACAGCATTTCTAATTTCAGGAA;TTAGCTC
TCONS_00076133	XLOC_034848	Y43F8A.5	0	0.424	0.424	0.049594	Y43F8A.5.1	j	V:19384886-19391292	-	1	19386716	19386717	1	TTAGCAC
TCONS_00028617	XLOC_010821	Y71H2AM.15	0.102	0.521	0.42	0.084166	Y71H2AM.15b.1	j	III:2747114-2756931	-	4	2748714;2749110;2750135;2752005	2748715;2749111;2750140;2752006	1;1;5;1	GCAGAAG;GCAGGTG;TTTTCCAGAGT;ACAGGCG
TCONS_00080972	XLOC_036955	pgp-4	0.274	0.669	0.395	0.003573	F42E11.1a.1	=	X:11160980-11392852	+	1	11359147	11359153	6	CATTTTTAGGAG
TCONS_00051724	XLOC_022555	kin-5	0.344	0.734	0.39	0.081471	T13H10.1.1	j	IV:9966677-9971251	-	1	9967738	9967739	1	TCAGTAT
TCONS_00026031	XLOC_009990	saeg-2	0.007	0.389	0.382	9.02e-09	T23G5.6.1	j	III:9239246-9242522	+	1	9240337	9240369	32	CATATACACTCAAATCTTAAAATTTAAATTTTCAGCAC
TCONS_00073112	XLOC_033486:kmo-1	kmo-1	0.362	0.74	0.378	0.003747	R07B7.5.1	=	V:12065588-12071692	-	1	12069231	12069236	5	CAGTTTAGGGC
TCONS_00031698	XLOC_011968:T21C12.8	T21C12.8	0.013	0.383	0.37	0.001167	T21C12.8a.1	j	III:10551074-10565809	-	1	10552282	10552283	1	TCAGAAG
TCONS_00037573	XLOC_014683	Y11D7A.8	0.524	0.893	0.369	0.000104	Y11D7A.8.1	j	IV:9250737-9256117	+	1	9251379	9251442	63	AAAAGCATGATTACTCTATTGTTTTTATACCAGGCTATTATTCGAAATTTCGAAGAAATCGTGCAGTTT
TCONS_00087340	XLOC_039637	oac-14	0.291	0.653	0.363	0.064393	F09B9.1a.1	j	X:10139373-10142140	-	1	10141716	10141717	1	TCAGAAC
TCONS_00065276	XLOC_029814:frpr-15	frpr-15	0.01	0.361	0.352	0.045065	K10C8.2.1	=	V:12670352-12692471	+	1	12690505	12690507	2	TTCAGAGT
TCONS_00087693	XLOC_039766:del-5	del-5	0.024	0.365	0.342	0.019441	F59F3.4.1	=	X:11004962-11009070	-	3	11005697;11006754;11007380	11005698;11006759;11007381	1;5;1	GCAGACG;TATTATAGGTC;TTAGACT
TCONS_00067335	XLOC_030863	usp-50	0.571	0.912	0.34	0.001249	E01B7.1.2	j	V:17924538-17934327	+	1	17924983	17924986	3	TTCAGCGGG
TCONS_00032006	XLOC_012091:sup-1	sup-1	0	0.333	0.333	0.047723	Y41C4A.13.1	j	III:11724037-11750160	-	1	11737627	11737629	2	TCCAGCTT
TCONS_00010527	XLOC_003998:T25D3.4	T25D3.4	0.38	0.708	0.329	0.026211	T25D3.4a.1	=	II:147240-156043	+	1	147387	147389	2	TTCAGGTA
TCONS_00076791	XLOC_035076:Y73B3A.13	Y73B3A.13	0	0.319	0.319	0.011225	Y73B3A.13.1	j	X:117303-139981	+	1	131008	131020	12	AAGTTCCAATTTCAGAAA
TCONS_00026360	XLOC_010109	K03H1.5	0.592	0.909	0.317	0.025459	K03H1.5.1	=	III:9931890-9939863	+	1	9934514	9934521	7	TAGGTTCCAGAAC
TCONS_00084861	XLOC_038616:hpk-1	hpk-1	0.134	0.441	0.307	0.003785	F20B6.8a.1	=	X:4204601-4217419	-	1	4214561	4214563	2	TGCAGAAA
TCONS_00005811	XLOC_002251:Y71F9B.6	Y71F9B.6	0.142	0.447	0.305	0.000873	Y71F9B.6a.1	j	I:2718026-2727545	-	1	2726723	2726724	1	GCAGACG
TCONS_00076899	XLOC_035109	R04A9.6	0.035	0.338	0.303	0.009083	R04A9.6.1	j	X:389321-400713	+	1	398125	398148	23	CAGTTTTTCCAAAATGAATATTCCAGAAG
TCONS_00021349	XLOC_008242	tag-180	0.098	0.374	0.276	0.010001	T24F1.6a.1	=	II:11322753-11329975	-	8	11323406;11324134;11324600;11324762;11325280;11327203;11328511;11328850	11323407;11324135;11324601;11324763;11325281;11327204;11328512;11329107	1;1;1;1;1;1;1;257	TCAGTCG;TTAGCAA;TCAGCTC;TCAGACA;TCAGTAC;TCAGGAC;TTAGGAG;CCTACATATATCTCTAGTCGGAGCCCCAACGCCAAACCGAATTTAACTCTCTCTCTCTATTCTATTCTTTTTCTATTGGAGGCTGCTCAGGGGAGAGAATACGGCAAAGAATCATCGTGGATTCTCTATCGAAGCGGCGGCGACGAAGGCATTTTATTTATTTCTGCTCGAATGCTCCAATCGACGCTTTCAGAGCTAGGCGAGCCCTAACACCTGACCTCTCTCGCGCAAATGCTTCTACTCCTGACTATTCTATTCAGGCT
TCONS_00077800	XLOC_035518:F11D5.1	F11D5.1	0.061	0.334	0.272	0.010191	F11D5.1a.1	=	X:3332418-3347302	+	1	3334112	3334114	2	TTCAGCAG
TCONS_00048810	XLOC_021071:unc-5	unc-5	0.064	0.333	0.269	0.009577	B0273.4c.1	j	IV:5495643-5528338	-	1	5499506	5499507	1	TCAGTTG
TCONS_00024992	XLOC_009594	acr-21	0.067	0.32	0.253	0.053278	F27B3.2a.1	j	III:6580035-6586606	+	2	6583452;6585939	6583461;6585947	9;8	GAGAAACTGCAGACG;ATTTAGGTCTCATT
TCONS_00021004	XLOC_008113	myrf-1	0	0.248	0.248	0.026503	F59B10.1.1	j	II:10496935-10506044	-	1	10500685	10500686	1	TCAGCCC
TCONS_00009940	XLOC_003803	aex-6	0.005	0.251	0.246	0.056977	Y87G2A.4.1	=	I:13543078-13547816	-	1	13544270	13544271	1	GCAGATT
TCONS_00077077	XLOC_035193	lmp-2	0.003	0.246	0.244	0.039865	C05D9.2.1	j	X:1124934-1128288	+	1	1126832	1126839	7	CAGAAGGACGTGA
TCONS_00014041	XLOC_005348	unc-105	0.028	0.272	0.244	0.000785	C41C4.5h.1	=	II:8112261-8124950	+	1	8121773	8121824	51	CAGCTCGATTTCGGCCCAATCACATCATTCAGTACCCGTCCATAGAGCTTCCAGGGT
TCONS_00083423	XLOC_038039	ZK1193.2	0.652	0.897	0.244	0.046612	ZK1193.2a.1	=	X:406458-425679	-	1	408154	408507	353	AACGACAAAACCCAGAGGAGGCTGTTAATAGACTTCACGGCAGCCGCCGCGATAGGGTTTCCGGCGGTTGTCGTGACATTTGGTTCACGAAAAGTAAAGCGGTCATACCGCTAGTCTATGACGGCTTTAGCCTACGTAAACCCCTACAGCTTGAATTCAGACTAGAAGAGATATAAATGCCGCAAGTAACTCTCTGGTAAATCTCTTGTCCGCAGCAAGCTTTGTCGACTCACTTTTGACCCCAATGGGCAACCTTTACCTTTACTATTAAGCATTGGTGGGACAAAACCGCGCCATAAACAAATATGACTACAAGAACTGCCACTAATCAAGCTTTATCGTACTCTAGTTTTTAGCTA
TCONS_00086585	XLOC_039306:dim-1	dim-1	0.035	0.278	0.243	0.006429	C18A11.7a.1	=	X:8050475-8065688	-	1	8057884	8057885	1	TCAGGCT
TCONS_00074249	XLOC_033958:C53A5.16	C53A5.16	0.337	0.58	0.243	0.001618	C53A5.16a.1	j	V:14518307-14522686	-	1	14522189	14522195	6	TAGTTTGAGGTT
TCONS_00009846	XLOC_003775:M01E5.2	M01E5.2	0.181	0.419	0.238	0.042636	M01E5.2.2	j	I:13276955-13286989	-	3	13278501;13278875;13282401	13278502;13278877;13282407	1;2;6	TCAGCTA;TTTAGATG;AAGTTTCAGATC
TCONS_00070554	XLOC_032299	T05H4.15	0.676	0.906	0.23	0.043024	T05H4.15a.1	=	V:6438624-6441712	-	1	6440472	6440473	1	TCAGATC
TCONS_00052025	XLOC_022663	T07G12.5	0.01	0.239	0.229	0.085081	T07G12.5a.1	=	IV:10541438-10545354	-	1	10544091	10544093	2	TTCAGTCT
TCONS_00037309	XLOC_014617	alp-1	0.056	0.283	0.227	3.52e-06	T11B7.4d.1	=	IV:8852494-8867765	+	1	8860357	8860546	189	TAGTGAGATCATGGTGGTGAGATGATGACAACAACGAGAATTGAAGTTGAAAAGAAGTATCTGTAGGAGATAATTATTCATTTATTTATGTTTATCATCCGGTGTATTTCAGTAGTATTCTAGTCAAATAAAATTGTTCAATGAGCACGCACTCACCATAATTCCATCATATTCTAACAACATTCTATCTAGGTT
TCONS_00063603	XLOC_029018	frpr-13	0.038	0.264	0.226	0.075765	K06C4.17.1	j	V:8898749-8902586	+	1	8900948	8900956	8	AAGTATTTCAGCGA
TCONS_00005959	XLOC_002294	mod-5	0.061	0.286	0.225	0.03204	Y54E10BR.7.1	=	I:3035124-3047847	-	4	3038932;3042153;3042530;3043189	3038933;3042155;3042532;3043191	1;2;2;2	TCAGGGT;TCCAGATA;TTCAGAAA;TTCAGATT
TCONS_00070158	XLOC_032122	snpc-1.3	0	0.22	0.22	3.55e-05	F08F3.9b.1	j	V:5437083-5439955	-	1	5439166	5439171	5	TAATTCAGAAT
TCONS_00025743	XLOC_009871	sor-1	0.166	0.376	0.21	0.091869	ZK1236.3a.1	j	III:8416226-8422651	+	1	8419203	8419205	2	TTCAGATA
TCONS_00006703	XLOC_002572	C32E12.4	0.534	0.737	0.203	0.057957	C32E12.4.2	j	I:5230313-5242793	-	7	5232395;5235557;5236070;5237631;5239670;5240776;5241021	5232417;5235558;5236071;5237632;5239671;5240777;5241022	22;1;1;1;1;1;1	TGTCTCTTTACATTAATTCTTCCAGAAA;ACAGGAA;TCAGGGA;TCAGAAA;TCAGGCA;GCAGCCT;TCAGATA
TCONS_00085032	XLOC_038692	C46C11.4	0.01	0.202	0.191	0.086833	C46C11.4.1	j	X:4644345-4647297	-	1	4646773	4646775	2	TTCAGGGC
TCONS_00071703	XLOC_032850	slc-17.7	0.805	0.993	0.188	0.028732	ZK682.2.1	=	V:9263799-9266500	-	1	9264599	9264600	1	TCAGCTT
TCONS_00002281	XLOC_000832:let-383	let-383	0.002	0.189	0.187	0.000112	T21G5.6.1	j	I:6862134-6872423	+	1	6868688	6868695	7	TTCAGGTCAAATT
TCONS_00026551	XLOC_010194:sly-1	sly-1	0.083	0.264	0.181	0.048682	F43D9.3b.1	j	III:10506105-10518747	+	1	10507058	10507129	71	CCGTTTGACACGCTTCTCGTCTTCTATTCTACGTGGCCGTAAATCTACACAGATTTTATCAGATAATTTTCCAGGGT
TCONS_00028212	XLOC_010683:fbxa-5	fbxa-5	0.003	0.18	0.177	0.022406	Y82E9BL.8.1	j	III:1331944-1344737	-	1	1340305	1340333	28	AAAATGTCCGACCAACAGGCTGATCTGACAGAAA
TCONS_00062159	XLOC_028331:ugt-14	ugt-14	0.752	0.925	0.172	0.079106	H23N18.2.1	=	V:4903795-4908298	+	1	4906445	4906475	30	CAAGAAATGATGTGAAAATTTTAATTTTTTCAGACT
TCONS_00017757	XLOC_006801:F08D12.7	F08D12.7	0.032	0.205	0.172	0.070729	F08D12.7.1	j	II:2758624-2819187	-	1	2769119	2769121	2	TCCAGCCA
TCONS_00010622	XLOC_004000:etr-1	etr-1	0.015	0.187	0.171	0.02258	T01D1.2v.1	=	II:162198-211941	+	1	166955	166961	6	AAGTTTCAGCTC
TCONS_00082088	XLOC_037477	jmjd-3.2	0	0.17	0.17	6.64e-07	F23D12.5.1	j	X:14447671-14453885	+	1	14448774	14448905	131	TAGGGGTCGCAACATGCGGCATTTCTTTAAATTTCCTCAAAAGCTAGTAGATTCTCCAATTGTCAGCACAAATGATTCTGAACCAATTAATGAACAAGTTTATTCAACACAAAGTAATCATGGCGAGCTTCAAGATA
TCONS_00076700	XLOC_035038	dnj-25	0.012	0.18	0.168	0.015684	W07A8.3a.2	=	V:20729947-20744406	-	2	20736331;20736510	20736337;20736516	6;6	GAGTTTCAGCAC;AAGTTTCAGATT
TCONS_00071502	XLOC_032751:ddn-1	ddn-1	0.837	1	0.162	0.058665	B0507.10.1	=	V:8755852-8764215	-	1	8760193	8760195	2	TTCAGACA
TCONS_00010680	XLOC_004000:chs-2	chs-2	0.005	0.151	0.147	0.001668	F48A11.1c.1	j	II:162198-211941	+	2	179634;210668	179692;210669	58;1	CAGGTGAACACATTGCTAGAAAAACCGGAAAGGAGTCGGGTGCAAAGGAGCGCCAAAACCAGAT;TCAGGAC
TCONS_00083387	XLOC_038031	C04E7.3	0	0.146	0.146	0.004292	C04E7.3.1	j	X:334800-349539	-	1	337532	337681	149	AAGGGAGATACTGTGAACAATCTCAATACTTGTATGCTCCAGCCGCACCCGTCCCCTACCGCAAAAAGGCATGAAAATCCGAGGTCACCGGTTTTTAAAGTTCCAAGAAAATTTGTTTCAAAACGCGAAAATATTCAAGCACTAATATTGAGAAA
TCONS_00062204	XLOC_028339:K11D12.12	K11D12.12	0.806	0.944	0.138	3.23e-05	K11D12.12.1	j	V:4943115-5053490	+	1	5050157	5050162	5	CAGGAACGACA
TCONS_00014780	XLOC_005640	egl-43	0	0.136	0.136	0.073481	R53.3c	=	II:9954940-9962910	+	1	9960938	9960939	1	TCAGGCA
TCONS_00018867	XLOC_007263:F59E12.16	F59E12.16	0.083	0.219	0.136	0.02585	F59E12.16c	j	II:5543580-5657371	-	1	5630253	5630259	6	CAGCTTCAGCCG
TCONS_00047449	XLOC_020365:F42A6.6	F42A6.6	0.001	0.135	0.134	0.032402	F42A6.6d.1	j	IV:3334041-3350033	-	1	3338544	3338548	4	ATTTCAGTGA
TCONS_00087311	XLOC_039632:unc-58	unc-58	0.002	0.132	0.13	0.017235	T06H11.1b.1	j	X:10104532-10135904	-	4	10105527;10106298;10106721;10107793	10105528;10106301;10106723;10107794	1;3;2;1	ACAGATT;TTTCAGGTG;AACAGTTC;TCAGTAC
TCONS_00019112	XLOC_007381	tat-4	0.001	0.129	0.128	2.45e-15	T24H7.5c.2	=	II:6234482-6244287	-	1	6235505	6235507	2	TCCAGGCA
TCONS_00084631	XLOC_038516	cgr-1	0.007	0.134	0.127	0.028229	T27A10.7.1	j	X:3597275-3600762	-	1	3600457	3600475	18	TTCATTAATTCTCGTTTTCAGACA
TCONS_00066443	XLOC_030354	prde-1	0.063	0.187	0.124	0.063198	F21A3.5.1	j	V:15538188-15547058	+	1	15546938	15546970	32	CAGAAATTCGTCACTTGTACCATCAATCAATTCTCTGG
TCONS_00085241	XLOC_038774	rga-8	0	0.124	0.124	5.29e-06	Y34B4A.8c.1	j	X:5264329-5289726	-	3	5272325;5272672;5275126	5272339;5272681;5275135	14;9;9	TAGAACCTTTGTGTCAGTTA;AAGAAATTTCAGTCG;TAGTTATTTCAGGAA
TCONS_00005355	XLOC_002105	pde-6	0.02	0.134	0.113	0.034469	Y95B8A.10a.1	j	I:872310-882713	-	2	874742;877914	874743;877915	1;1	CCAGACT;TCAGACG
TCONS_00002451	XLOC_000900	kbrl-1	0.008	0.12	0.112	0.005247	F52A8.6c.4	=	I:7339203-7352235	+	1	7348429	7348432	3	CAGGCCACA
TCONS_00014515	XLOC_005548	T26C5.3	0.079	0.188	0.109	0.064393	T26C5.3a.1	j	II:9236582-9250522	+	2	9243301;9243518	9243306;9243523	5;5	CAGAGGCTTCT;CAGCGATGTCA
TCONS_00079111	XLOC_036152	F38B6.4	0.016	0.122	0.107	0.037527	F38B6.4.1	j	X:6674742-6679948	+	1	6675800	6675804	4	TAGGAGGAAT
TCONS_00082158	XLOC_037512:eor-2	eor-2	0.001	0.107	0.106	0.018089	C44H4.7b.2	=	X:14603016-14624841	+	1	14604011	14604017	6	AAGTTTCAGAAA
TCONS_00026263	XLOC_010073:cbp-1	cbp-1	0.025	0.131	0.106	0.094217	R10E11.1a.1	=	III:9757615-9774857	+	2	9768412;9768680	9768421;9768713	9;33	CAGCTTTTACAGGAA;CAGCCGATACCACACAAACTACAAAAAAATGTTCAGTCG
TCONS_00049909	XLOC_021749:smg-3	smg-3	0.107	0	-0.107	0.001046	Y73B6BL.18a.1	=	IV:6361967-6376700	-	1	6368208	6368214	6	TAGTTTCAGATG
TCONS_00026007	XLOC_009977:ced-11	ced-11	0.115	0.005	-0.11	0.037527	ZK512.3.1	j	III:9103942-9125176	+	1	9120572	9120577	5	CAGGTGCTTCG
TCONS_00006067	XLOC_002324	edc-4	0.14	0.03	-0.11	0.013963	Y44E3A.6b.1	=	I:3340230-3349999	-	1	3343623	3343629	6	AAGTTTCAGATG
TCONS_00009269	XLOC_003540	dys-1	0.124	0.012	-0.111	0.029302	F15D3.1h.1	=	I:11517557-11570859	-	3	11528563;11550599;11552153	11528566;11550600;11552155	3;1;2	TTTTAGAAG;TCAGCGA;TGCAGATC
TCONS_00031171	XLOC_011762	clip-1	0.112	0	-0.112	1.12e-05	M01A8.2a.1	j	III:9257258-9269081	-	1	9263109	9263110	1	GCAGACG
TCONS_00028520	XLOC_010786:Y54F10BM.9	Y54F10BM.9	0.125	0.013	-0.112	0.000351	Y54F10BM.9.1	j	III:2294662-2305239	-	4	2297021;2298482;2298669;2303068	2297022;2298483;2298671;2303083	1;1;2;15	TCAGCTG;CTAGGAC;TTCAGCTG;AAATCTACATCTTTTCAGATG
TCONS_00021037	XLOC_008120:cdc-48.1	cdc-48.1	0.944	0.825	-0.118	0.075765	C06A1.1.1	j	II:10534331-10563867	-	1	10562040	10562042	2	TTTAGGGT
TCONS_00078381	XLOC_035811	lfi-1	0.133	0.013	-0.12	0.000214	ZC8.4a.2	=	X:4972569-4997976	+	1	4984775	4984790	15	AAGGGATGAGTACTCCAGGGA
TCONS_00023367	XLOC_009011:gip-1	gip-1	0.123	0	-0.123	0.06345	H04J21.3a.1	=	III:2343571-2362056	+	1	2356679	2356685	6	GAGTTTCAGTGG
TCONS_00002280	XLOC_000832:let-383	let-383	0.158	0.024	-0.134	0.067363	T21G5.6.1	j	I:6862134-6872423	+	1	6868688	6868692	4	TTCAGGTCAA
TCONS_00085623	XLOC_038938	prx-3	0.143	0.007	-0.137	6.37e-05	C15H9.8a.1	j	X:6110753-6113133	-	2	6111737;6112918	6111763;6113057	26;139	GTCATGATCCTGACACTTGAGGCGTTTAGGCA;GGTATTCCTGCGTCTCTAAAATTAACGTATTGTCTCTAAAACCTATTCCATTTATCTTGTGTCAGTGAATACCATTTCATTTCTTCAATTGCACAATTAAAAAAAAAACACCATTTTATTCATATTTCGAGTAACATTTCAGAAA
TCONS_00062090	XLOC_028298	ugt-61	0.141	0.002	-0.139	0.053728	F39G3.1.1	j	V:4742426-4745376	+	1	4742718	4742726	8	TAGATTCAATTCAA
TCONS_00087850	XLOC_039828	slo-2	0.145	0.006	-0.139	1.11e-06	F08B12.3a.1	=	X:11393292-11405931	-	1	11399542	11399543	1	TCAGTGC
TCONS_00014753	XLOC_005637	C05C10.2	0.239	0.097	-0.142	0.098481	C05C10.2b.1	j	II:9918046-9930830	+	1	9930448	9930454	6	TAGTTTCAGAAA
TCONS_00033738	XLOC_012700:F58E2.4	F58E2.4	0.177	0.036	-0.142	0.001872	F58E2.4.1	j	IV:3463279-3470711	+	2	3467703;3468526	3467710;3468534	7;8	AAGAAATTAGATC;TAGTTTTTCAGGAA
TCONS_00008350	XLOC_003166	F36H2.3	0.142	0	-0.142	9.87e-05	F36H2.3h.1	j	I:9250658-9261880	-	3	9255766;9257134;9258996	9255767;9257136;9258997	1;2;1	TCAGGAA;TTAAGATC;TCAGTCG
TCONS_00019281	XLOC_007453:dnj-8	dnj-8	0.912	0.766	-0.146	0.003795	C56C10.13a.1	=	II:6589289-6612403	-	1	6597541	6597542	1	ACAGGCA
TCONS_00071701	XLOC_032850	slc-17.7	0.146	0	-0.146	9.41e-07	ZK682.2.1	=	V:9263799-9266500	-	1	9264599	9264600	1	TCAGCTT
TCONS_00077094	XLOC_035199:T13G4.1	T13G4.1	0.147	0.001	-0.147	0.000416	T13G4.1.1	o	X:1188421-1210879	+	2	1191912;1193426	1193147;1193427	1235;1	TTTTATTTTTCAAGTGCGCGAATATCCCGCTGGGTCTCTCCCTCAAAAATGTTTGAAAAATGCGGGAAAATTTGTTTGAATTCACTTGTCTGCATATATACCGTTTTCTTGTTTTGATGTGCACAGAAAATACTTAATTAGTTAGAATTTAGAATGTCTTTGTCTGTACTGTTCAAATTTTTTAGTGTTTTTTTCTATGATGATAGGGCATTGATAGGGTAGCTGATATTACTCAGAATTTGGTGCTAGCCTCTTGCCCCAAGTTTGGGCAAAATTTGTTTTAGGCAGCTTCCAAGTTTAGCCCAATTTTGATATAATTATTACCGAACTCTTACCACACTTAAAAATTTGAGGAAAACTTTGGCACTAGTTGGGTTAAATTAGGGGTTGTCTTGGACA…
TCONS_00028912	XLOC_010910	C46F11.6	0.148	0	-0.148	0.075765	C46F11.6.1	j	III:3664857-3674651	-	1	3670436	3670442	6	ATTTTTCAGGGT
TCONS_00025399	XLOC_009740	Y80D4G.1	0.168	0.016	-0.152	0.091803	Y80D4G.1	j	III:7601296-7604324	+	1	7603697	7603716	19	AAGGCCTCATCCAACTCTTCAGCTA
TCONS_00017592	XLOC_006744:fbxa-182	fbxa-182	0.184	0.031	-0.153	0.005558	F42G2.4.1	j	II:2404949-2412966	-	1	2410688	2410689	1	TTAGGCA
TCONS_00034186	XLOC_012884	F28E10.1	0.167	0.006	-0.16	6.22e-05	F28E10.1b.1	=	IV:4568791-4590473	+	2	4581357;4585234	4581365;4585317	8;83	TTTTTTTGCAGAAT;TAGTTTTGCCTCTCCGTCTTTATCAATTTCCGCCTGTCTTTCACCCTTGTAGTCACGTCCGTATTCTGTATATTCAGCATTCTCAGGTC
TCONS_00052673	XLOC_022918:unc-22	unc-22	0.215	0.043	-0.172	0.013294	ZK617.1g.3	=	IV:11970533-12011009	-	1	11972863	11972916	53	TTTCTCACGATTTTTTCCATTGTATGCGTTCTGAAATTTGACTTGAAAATTTTCTGCTT
TCONS_00080345	XLOC_036690	F15G9.1	0.794	0.621	-0.173	0.067673	F15G9.1a.1	=	X:9702239-9708563	+	1	9707328	9707362	34	GAATATACTCTTATTTAATAGCATATTTTTCATTCAGAAG
TCONS_00037168	XLOC_014579	catp-7	0.332	0.149	-0.183	0.040678	Y59H11AR.2a.1	j	IV:8585515-8594613	+	1	8589904	8589906	2	CAGAATAA
TCONS_00031134	XLOC_011750	cls-3	0.805	0.617	-0.189	0.081956	ZC84.3.2	=	III:9185854-9192951	-	1	9189906	9189907	1	TCAGCAA
TCONS_00019841	XLOC_007668:glr-4	glr-4	0.198	0.003	-0.194	0.000368	C06A8.9b.1	j	II:7784974-7795207	-	4	7786693;7787429;7787597;7787895	7786694;7787430;7787598;7787896	1;1;1;1	TCAGTTC;CCAGGTG;TCAGAAA;TCAGGTA
TCONS_00072769	XLOC_033317	dop-5	0.89	0.685	-0.205	0.007593	T02E9.3.1	j	V:11362452-11366309	-	2	11362916;11363931	11362917;11363937	1;6	TAAGTTG;CAGTTACAGCAT
TCONS_00078828	XLOC_036015	sups-1	0.235	0.025	-0.21	0.017499	F22F4.1.1	j	X:6004069-6018084	+	1	6005092	6005128	36	CAGATTCTGACACTAGGTATTACTACATTTACAGCTCAGTTT
TCONS_00070588	XLOC_032318:dpy-11	dpy-11	0.942	0.729	-0.213	0.081622	F46E10.9.2	j	V:6511587-6519409	-	1	6513346	6513348	2	TCCAGAAT
TCONS_00046753	XLOC_020122	madf-1	0.229	0.014	-0.215	7.33e-06	Y55F3BR.5a.1	j	IV:794631-833356	-	1	831804	831806	2	TTCAGATG
TCONS_00005435	XLOC_002120:Y48G8AL.10	Y48G8AL.10	0.27	0.052	-0.218	0.046612	Y48G8AL.10a.1	j	I:1136370-1156454	-	1	1154386	1154387	1	GCAGAAA
TCONS_00088271	XLOC_040018:scd-1	scd-1	0.219	0	-0.219	0.076631	H20J18.1a.1	j	X:12503884-12525789	-	2	12505272;12506413	12505311;12506415	39;2	CAGGTTGACTTTGCCGCGCGTCCAATTGATCCCATTTTCAAGGAT;TTCAGGAA
TCONS_00031223	XLOC_011781:T26G10.7	T26G10.7	0.232	0.012	-0.22	0.065321	T26G10.7	j	III:9408962-9414602	-	2	9409205;9409400	9409206;9409401	1;1	TCAGAGA;TCAGAAT
TCONS_00037308	XLOC_014617	alp-1	0.527	0.303	-0.224	0.021155	T11B7.4b.1	=	IV:8852494-8867765	+	1	8860357	8860546	189	TAGTGAGATCATGGTGGTGAGATGATGACAACAACGAGAATTGAAGTTGAAAAGAAGTATCTGTAGGAGATAATTATTCATTTATTTATGTTTATCATCCGGTGTATTTCAGTAGTATTCTAGTCAAATAAAATTGTTCAATGAGCACGCACTCACCATAATTCCATCATATTCTAACAACATTCTATCTAGGTT
TCONS_00009845	XLOC_003775:M01E5.2	M01E5.2	0.23	0.004	-0.226	0.005007	M01E5.2.2	j	I:13276955-13286989	-	2	13278501;13278875	13278502;13278877	1;2	TCAGCTA;TTTAGATG
TCONS_00048056	XLOC_020587	set-15	0.234	0	-0.234	0.044661	R11E3.4.1	=	IV:4763465-4792181	-	1	4778295	4778297	2	TTCAGAAA
TCONS_00072188	XLOC_033037	che-12	0.236	0	-0.236	0.098481	B0024.8c.1	=	V:10299439-10307423	-	1	10302836	10302837	1	TCAGAGA
TCONS_00067037	XLOC_030677	F49H6.5	0.266	0.024	-0.242	0.068022	F49H6.5a.1	j	V:16922098-17120791	+	2	17023473;17024381	17023475;17024395	2;14	TACAGATG;AAGTTGCCTCGATTTAGATA
TCONS_00072883	XLOC_033384	sipa-1	0.286	0.042	-0.244	0.000422	T27F2.2f.1	j	V:11631433-11637291	-	1	11632664	11632667	3	CAGCAGGTA
TCONS_00030227	XLOC_011386	flap-1	0.793	0.546	-0.247	0.009304	F57B9.7b.1	j	III:6924096-6939702	-	1	6928815	6928817	2	TTCAGAAA
TCONS_00016856	XLOC_006474:snt-6	snt-6	0.284	0.035	-0.249	0.009046	C08G5.4a.1	=	II:723787-768176	-	1	749585	749586	1	CCAGATA
TCONS_00022728	XLOC_008791:klp-20	klp-20	0.343	0.084	-0.259	0.021647	Y50D7A.6.3	j	III:194459-254067	+	1	209992	209994	2	TTCAGAAC
TCONS_00012908	XLOC_004871:C17C3.1	C17C3.1	0.355	0.094	-0.261	0.006853	C17C3.1b.1	=	II:5543580-5657371	+	1	5572638	5572701	63	CTCATTATTGACATCACAATTAATTTCCAATGATTTTTTGAAGTAGTTTTCAAAATCAATTTCCAGAAT
TCONS_00085462	XLOC_038857	rgs-6	0.276	0.004	-0.272	0.002897	C41G11.3a.1	j	X:5720437-5733779	-	2	5724306;5726882	5724307;5726883	1;1	TCAGACA;CCAGATT
TCONS_00087377	XLOC_039655:C14H10.3	C14H10.3	0.402	0.127	-0.275	0.000913	C14H10.3b.1	j	X:10220643-10236950	-	1	10224340	10224525	185	GGTTTTGTGGGCCTTTGCGTGTCTGAGTGTGTCAATTTCTAGAAGGAGTGAAAAAGGGAAATGTATGCTTGTCCCAAGGGAACGTCGACACTTCTTTGTTCAACATGTTTCGCGCCCACACATACACAAGTGTCCACAAAATTTATTCGCACCTTAACATGCGGCCATTATTATTTGTGAAATTTCAGCAA
TCONS_00086876	XLOC_039441	M02D8.3	0.876	0.601	-0.275	0.039865	M02D8.3.1	j	X:8732927-8737136	-	1	8737013	8737015	2	TTTAGATA
TCONS_00084644	XLOC_038523	R11G1.6	0.864	0.583	-0.281	0.071809	R11G1.6d.1	=	X:3639188-3645039	-	2	3639836;3643139	3639842;3643140	6;1	TAGTTGCAGCGG;GCAGACA
TCONS_00069373	XLOC_031770	fbxa-64	0.951	0.636	-0.315	0.059205	T28A11.21.1	j	V:3276935-3279231	-	1	3278145	3278147	2	TTCAGATA
TCONS_00053141	XLOC_023099	C39E9.7	0.878	0.559	-0.319	0.093642	C39E9.7.1	=	IV:13072612-13082781	-	2	13074729;13075245	13074731;13075246	2;1	TCCAGGTT;TCAGTCT
TCONS_00052047	XLOC_022676	glb-19	0.936	0.615	-0.321	0.093865	F56C4.3a.1	j	IV:10642747-10654333	-	3	10643597;10643787;10644558	10643599;10643789;10644559	2;2;1	TTCAGGCC;TTCAGATC;GCAGGTT
TCONS_00032652	XLOC_012315	tcl-2	0.659	0.325	-0.334	0.005774	Y38C1AA.4a.1	=	IV:173451-183265	+	1	179716	179717	1	CCAGATT
TCONS_00014742	XLOC_005634	F26C11.1	0.353	0.008	-0.345	0.016155	F26C11.1.1	=	II:9894749-9897501	+	1	9896063	9896068	5	TAGTTCAGATT
TCONS_00028543	XLOC_010791	H14E04.3	0.664	0.319	-0.346	0.022699	H14E04.3.1	j	III:2384889-2391489	-	1	2386581	2386582	1	CCAGAAA
TCONS_00087756	XLOC_039796	C05C9.3	0.347	0	-0.347	0.007706	C05C9.3.1	j	X:11142726-11157643	-	4	11145671;11146064;11146198;11146995	11145673;11146065;11146199;11146996	2;1;1;1	TGCAGTCA;ACAGAGA;CTAGGTT;TTAGACG
TCONS_00076635	XLOC_035003	F26F2.1	0.393	0.038	-0.355	0.081956	F26F2.1.1	=	V:20558880-20562189	-	5	20559656;20559777;20560243;20560837;20561260	20559657;20559779;20560244;20560839;20561261	1;2;1;2;1	TAAGATG;TTCAGAAT;CCAGCGT;TACAGCGT;TTAGCGT
TCONS_00076126	XLOC_034845	C14B4.2	0.581	0.222	-0.359	0.00013	C14B4.2.1	j	V:19332423-19367333	-	2	19349493;19362672	19349495;19362676	2;4	TTCAGATA;CACTTTCCAG
TCONS_00025826	XLOC_009894	C02D5.2	0.396	0.027	-0.368	0.002155	C02D5.2a.1	=	III:8556469-8559194	+	1	8557924	8557925	1	TTAGCTC
TCONS_00016194	XLOC_006259	Y54G11A.11	0.955	0.587	-0.369	0.069658	Y54G11A.11.2	j	II:14349782-14358113	+	1	14350153	14350161	8	CAGAACCAATCCAA
TCONS_00073113	XLOC_033486:kmo-1	kmo-1	0.585	0.215	-0.37	0.004283	R07B7.5.1	j	V:12065588-12071692	-	1	12069231	12069236	5	CAGTTTAGGGC
TCONS_00010381	XLOC_003924	K05C4.3	0.373	0	-0.373	0.082171	K05C4.3.1	j	I:14748005-14754312	-	1	14753142	14753143	1	TCAGGAA
TCONS_00000075	XLOC_000021:duox-2	duox-2	0.974	0.599	-0.375	0.005216	F53G12.3.1	j	I:137534-146468	+	1	138017	138066	49	TAGTTACCCCTAGAAATCAAAGTTCAGTTCAGCAAAGAGACTTTATTTTCAGCAC
TCONS_00009211	XLOC_003510	F56G4.6	0.513	0.138	-0.375	0.000584	F56G4.6.1	j	I:11364286-11380127	-	1	11374334	11374340	6	GATTTTCAGGTA
TCONS_00030976	XLOC_011683	F44E2.4	0.684	0.293	-0.39	7.79e-05	F44E2.4.1	=	III:8832400-8838424	-	3	8835019;8837027;8837240	8835022;8837028;8837241	3;1;1	TTTCAGATG;TTAGACA;TCAGCAA
TCONS_00066724	XLOC_030526	oac-5	0.454	0.06	-0.394	0.094522	C31A11.1.1	j	V:16292708-16295602	+	1	16292868	16292871	3	CAGAATGAT
TCONS_00088643	XLOC_040169	sad-1	0.422	0.027	-0.396	0.000212	F15A2.6b.1	=	X:13487290-13506053	-	3	13489703;13492016;13494479	13489704;13492034;13494480	1;18;1	CCAGGAT;TTAAATGCTCACTTTTTCTAGACA;TCAGGGT
TCONS_00020996	XLOC_008110:clec-60	clec-60	0.513	0.109	-0.404	0.018868	ZK666.6.1	=	II:10479919-10482228	-	1	10481633	10481639	6	TTATTTCAGCGT
TCONS_00061269	XLOC_027917:F36F12.3	F36F12.3	0.623	0.205	-0.418	0.085096	F36F12.3b	=	V:2086278-2095282	+	1	2086844	2086847	3	TTCCAGGAC
TCONS_00089125	XLOC_040370	C05G5.1	0.763	0.324	-0.439	0.05678	C05G5.1.1	=	X:14732282-14740109	-	2	14735037;14735411	14735038;14735412	1;1	TCAGGTA;TTAGGCG
TCONS_00088110	XLOC_039935	tsp-20	0.817	0.375	-0.442	0.045122	B0198.1.1	=	X:12025716-12034063	-	1	12032535	12032536	1	TCAGACG
TCONS_00008727	XLOC_003314	sys-1	0.765	0.323	-0.442	0.000248	T23D8.9a.2	=	I:9980063-9984848	-	2	9982846;9984424	9982857;9984428	11;4	AAGTTCAATTTCAGCTA;TTTTCAGATT
TCONS_00030481	XLOC_011472	ttr-8	0.523	0.079	-0.444	0.012818	R13A5.6.1	j	III:7561866-7565986	-	1	7565345	7565347	2	TTCAGATG
TCONS_00066203	XLOC_030226	nlp-59	0.561	0.114	-0.448	0.018222	F02D8.5.1	j	V:14962553-14972419	+	1	14971436	14971438	2	TGCAGGTA
TCONS_00047332	XLOC_020325:Y54G2A.26	Y54G2A.26	0.965	0.515	-0.451	0.000503	Y54G2A.26a.1	=	IV:2986024-3008999	-	2	2992186;2992487	2992188;2992511	2;24	TCTAGGAA;CAATTATCAAAAAGCTCGATTTTTCAGGAA
TCONS_00027780	XLOC_010573:F40G9.9	F40G9.9	0.686	0.213	-0.473	0.00486	F40G9.9.1	=	III:170219-184915	-	1	171521	171525	4	TTTTCAGAAA
TCONS_00037223	XLOC_014599	ttll-11	0.794	0.318	-0.476	0.025459	H23L24.3b.1	=	IV:8697702-8719264	+	1	8700403	8700476	73	AAGATTTTGCCATCATTTTTTTTTCGAAAATAACACTTTTTGTTGTATATCGTATGCAATAAATGAAATTATTCAGGTA
TCONS_00029813	XLOC_011233	pxl-1	0.63	0.154	-0.476	3.48e-06	C28H8.6a.1	j	III:5889720-5901669	-	1	5894130	5894292	162	AGAGAAAAGGAGCAGCACACCTTTTTCTTTTCCACGCACACAACACTTTTACCTATCACTTGGCGGAATGATGCGCGAGTTGCAACAACGGCTTGACCATTTCAATGGTCCAAATTATGCACAAAATAGTCATTCAAACCACCAACAACATCATTCGGTTTATAGCTC
TCONS_00087692	XLOC_039766:del-5	del-5	0.494	0.007	-0.487	5.75e-06	F59F3.4.2	j	X:11004962-11009070	-	4	11005187;11005697;11006754;11007380	11005188;11005698;11006759;11007381	1;1;5;1	GCAGTAC;GCAGACG;TATTATAGGTC;TTAGACT
TCONS_00016417	XLOC_006340	Y53F4B.11	0.591	0.099	-0.492	0.050707	Y53F4B.11a.1	=	II:15004868-15025963	+	2	15010953;15012977	15010954;15012985	1;8	GCAGAAG;TAGGATTTCAGGAG
TCONS_00063227	XLOC_028846:F40A3.3	F40A3.3	0.583	0.09	-0.493	0.038788	F40A3.3c.1	j	V:7877489-7881403	+	1	7877776	7877783	7	CAGAGGTCTCGCT
TCONS_00086014	XLOC_039095:F14B8.5	F14B8.5	0.518	0.021	-0.497	0.037273	F14B8.5a.3	=	X:6921645-6928930	-	1	6927924	6927989	65	AGCAAATATAACGTACTCCACTTGTTCTGTCCCTATGTTAAATTCTACCCTATTAAAACCCATTTCAGTCG
TCONS_00030604	XLOC_011524	ZK688.10	0.959	0.438	-0.52	0.086608	ZK688.10.1	=	III:7895428-7897025	-	1	7896505	7896506	1	TCAGTGA
TCONS_00015362	XLOC_005926:kin-6	kin-6	0.556	0.034	-0.523	0.029642	ZK20.2.1	j	II:11612256-11642611	+	1	11638963	11640341	1378	AAGGGCAAACGACAATTGGGATATAAAATGTCAAAGTTGAACAATTGGGCAAGATGCTAATAGAGGAAATGCGTTATTAAATGAGGAGAATCGTCAGTAAGAAAATTGTTTAAAAGCCGCTCATATAGTTCTGAAGTGTTCCAATAAAATTACAGAAATTTTCTGAAAATTTTGAAAATTTTTCATTTACAATCAAACGTGGTAAAAACTCCTTTTTCGCCTATAAAAACTTTGGAAGTAGACCAAAAAAATTCTTACTAGTTGCATACTTAGCGTTGTAAGGGTCGAACCTGTAGAAGTTTGGCAATATCCCAAGAAAATTTGACAATTTTTTTGGTTAGCATTTGTGTTGATATCTTATACTCAAAAGTTAATCAAAGTGGATTGAATTAATCGAAA…
TCONS_00060432	XLOC_027575	npr-26	0.648	0.111	-0.538	0.091789	T02D1.6c.1	=	IV:17408230-17417805	-	1	17410172	17410463	291	TATGTTTTACAATATGCAAACCAGGGGAACTTTTTTCAATTAAATTTCCACCCTACCCATGCTATTGTATCATGTTCGTGCATTTGTTTATGTCGTCTGGAAAACTCTCATTATGAGAAAACATTGGAGCAGGAAGTTGAGACGGAAGGAACAGGGAGACGGGAGTAGAAATCTGTTGTTTTTTTTTTATTATTTAGGTTACTGGTATAGCTATAACCTATAGGTTAGAGGTGACAAAAGAATTTTAAAATTTAAAAAAATACTTCATACTTTAAAAAAATGTAATATTTTCAGGAA
TCONS_00017262	XLOC_006641:str-179	str-179	0.624	0.077	-0.547	0.001094	F36H5.7	j	II:1746118-1761236	-	2	1747267;1753191	1747269;1753192	2;1	TCCAGGTC;GCAGAAT
TCONS_00076088	XLOC_034834	F21D9.2	0.669	0.048	-0.621	0.001115	F21D9.2.1	=	V:19258233-19262522	-	1	19259353	19259354	1	TCAGAAT
TCONS_00070353	XLOC_032210	M03F8.5	0.706	0.075	-0.631	0.074078	M03F8.5.1	=	V:5930842-5936855	-	1	5934539	5934541	2	TTCAGAAG
TCONS_00071708	XLOC_032854:lron-2	lron-2	0.99	0.197	-0.793	0.002729	ZK682.5.2	=	V:9284128-9288024	-	1	9285745	9285746	1	ACAGTTA

## Sheet: daf-2_d7_vs_daf-2_d1
Supplemental Table S3. A3 isoforms that were differentially regulated in wild-type and daf-2 mutant animals in old age compared with those at day 1 of adulthood
A3 isoforms differentially regulated in daf-2 mutant animals at day 7 of adulthood compared with day 1 of adulthood
Isoform_ID: Detected isoform, Gene_ID and Gene_name: A gene contains the isoform, Young: Isoform fraction in young samples, Old: Isoform fraction in old samples, Difference: Old - Young, q_value: Significance of the difference
Nearest_reference_ID: A reference isoform which is the most similar to the detected isoform, Class_code: The type of match between the detected isoform and the reference isoform, A3: The number of A3 in the isoform
Class_code, =: Complete match, j: Potentially novel isoform, o: Generic exonic overlap with a reference, x: Exonic overlap with a reference on the opposite strand, s: Intronic overlaps with a reference intron on the opposite strand
Isoform_ID	Gene_ID	Gene_name	Young	Old	Difference	q_value	Nearest_reference_ID	Class_code	Locus	Strand	A3	A3_genomic_start	A3_genomic_end	Distance_between_adjacent_3′_splice_sites_of_A3	Sequence_between_adjacent_3′_splice_sites_of_A3
TCONS_00053018	XLOC_023059	T23F6.3	0.021	0.843	0.822	0.007008	T23F6.3b.1	=	IV:12723102-12724651	-	1	12723326	12723345	19	TTTGAACACTGTTTATTTCCAGATG
TCONS_00067697	XLOC_031010	Y80D3A.11	0	0.796	0.796	0.00417	Y80D3A.11	j	V:18919256-18934830	+	1	18932457	18932459	2	TTCAGCAA
TCONS_00022438	XLOC_008684	gcy-29	0.001	0.785	0.783	0.018731	C04H5.3.1	j	II:14540894-14552476	-	4	14543380;14544578;14547908;14548236	14543381;14544581;14547923;14548237	1;3;15;1	TCAGCTA;ATTTAGGTT;AAGGCCGCGTAATTCCAGAAT;TCAGTTG
TCONS_00015973	XLOC_006160	Y48E1B.8	0.185	0.953	0.768	2.64e-06	Y48E1B.8.1	j	II:13585012-13589033	+	1	13587169	13587174	5	CAGAAACCCTT
TCONS_00039298	XLOC_015424	bus-12	0.185	0.934	0.749	0.001542	JC8.12a.1	j	IV:13256050-13259076	+	1	13256837	13256845	8	CAGCATGATAGTCT
TCONS_00037752	XLOC_014756:sdz-36	sdz-36	0.034	0.76	0.725	0.002215	ZK1251.7.1	o	IV:9687048-9691897	+	1	9690862	9690934	72	TAGAATATAGCTAAAATCGTTTTTATTGAGTGTTGCGTCTACCGTGTTGAAATCGTACATTTTTCCATACTTCAGAGC
TCONS_00010014	XLOC_003822	lagr-1	0.059	0.772	0.713	0.010496	Y6B3B.10.1	j	I:13724576-13733850	-	1	13732044	13732046	2	ATAAGGTG
TCONS_00017032	XLOC_006551:Y57G7A.5	Y57G7A.5	0.031	0.702	0.672	0.036619	Y57G7A.5.1	j	II:1273101-1287988	-	1	1274530	1274531	1	TTAGACA
TCONS_00083472	XLOC_038052	B0310.3	0.08	0.75	0.67	0.037358	B0310.3.1	=	X:510484-520976	-	1	514531	514623	92	TCATATATACTATGTATGTAGCTAAAAAAAATGGACCACCCTCTTTTTAATTGGATTAAGATAATTTTCAAATATCTTAGTAGTTTTTTTTTCAGAAC
TCONS_00000150	XLOC_000047	cutl-13	0.041	0.701	0.66	0.048788	W04C9.3.1	j	I:473946-481965	+	1	478465	478467	2	CAGAGGAA
TCONS_00020995	XLOC_008110:clec-60	clec-60	0.353	0.996	0.643	2.14e-07	ZK666.6.1	j	II:10479919-10482228	-	1	10481633	10481639	6	TTATTTCAGCGT
TCONS_00073322	XLOC_033582	pals-38	0.106	0.748	0.642	0.001063	C54D10.8a.1	=	V:12445160-12463230	-	2	12445998;12446224	12446000;12446226	2;2	TTCAGATC;TTTAGATG
TCONS_00083534	XLOC_038073	rund-1	0.313	0.954	0.641	0.077319	T19D7.4.1	j	X:656187-661962	-	1	661104	661106	2	TCCAGAAG
TCONS_00087753	XLOC_039796	C05C9.3	0.06	0.687	0.627	0.000359	C05C9.3.1	j	X:11142726-11157643	-	4	11145671;11146064;11146198;11146995	11145673;11146065;11146199;11146996	2;1;1;1	TGCAGTCA;ACAGAGA;CTAGGTT;TTAGACG
TCONS_00036726	XLOC_014390	F13B6.1	0.005	0.629	0.624	3.17e-05	F13B6.1.1	j	IV:7456524-7458214	+	1	7456748	7456772	24	TTCAGACTCGTTCCTGAAATTCTCCGATTC
TCONS_00020283	XLOC_007825	F46C5.2	0.35	0.971	0.62	0.095161	F46C5.2.1	=	II:8825914-8829684	-	1	8828844	8828845	1	CTAGGAC
TCONS_00027350	XLOC_010449:snf-7	snf-7	0.044	0.644	0.6	0.037642	ZK1010.9.1	j	III:12934095-13029708	+	1	13010954	13010956	2	CAGCCAAT
TCONS_00018632	XLOC_007171:srb-16	srb-16	0.132	0.719	0.586	0.080023	F58A6.6.1	=	II:5146966-5151243	-	1	5150353	5150354	1	CCAGCTT
TCONS_00065740	XLOC_030025	F09F3.8	0.001	0.582	0.581	0.005472	F09F3.8	j	V:13869763-13872619	+	1	13870541	13870552	11	CAGGAAGATCACAGATA
TCONS_00086180	XLOC_039165	K03A1.4	0.236	0.806	0.57	0.081818	K03A1.4a.1	j	X:7272305-7299901	-	1	7296507	7296509	2	TTCAGGAC
TCONS_00017951	XLOC_006879:sdz-35	sdz-35	0.187	0.731	0.544	0.014318	ZC239.12.1	=	II:3205678-3211381	-	1	3208218	3208219	1	TCAGCCG
TCONS_00046664	XLOC_020085	asm-3	0.211	0.746	0.535	0.081284	W03G1.7a.1	=	IV:415634-570875	-	2	521878;523413	521879;523420	1;7	TCAGTAA;AAGATTTCAGGAC
TCONS_00007968	XLOC_003055	ceh-6	0.045	0.57	0.524	0.081074	K02B12.1.1	j	I:8498113-8507645	-	1	8500087	8500088	1	TCAGGTT
TCONS_00077776	XLOC_035509:F11D5.7	F11D5.7	0.124	0.633	0.509	0.05588	F11D5.7.1	j	X:3282601-3307095	+	1	3300933	3300938	5	CAGGCAATGTT
TCONS_00011455	XLOC_004286:math-42	math-42	0.024	0.533	0.509	2.41e-05	T16A1.1a.1	j	II:2092570-2104326	+	2	2096296;2103509	2096304;2103517	8;8	CAGCCAAGCTTGAC;TAGTTTTACAGATG
TCONS_00053350	XLOC_023155	Y45F10B.13	0.439	0.908	0.47	0.013569	Y45F10B.13b.1	j	IV:13549432-13574440	-	1	13560195	13560197	2	TTCAGAGG
TCONS_00068256	XLOC_031257:mlt-11	mlt-11	0.183	0.646	0.464	0.013937	W01F3.3f.1	=	V:20667208-20678600	+	1	20668173	20668449	276	CAGGTTGAGTCTACCACTACCACAACTGAATCCCCAACCACTGAGGCTTCTACCACAACCACTGAAGCTCCAACCACCACTACTTCCGAGGAGGTCACTACCACTGAGATCACCACTGAAGCTCCAACCACCACCGAAGAGGTGACTACCACTGAGACCACTATAGAAGCTCAAACCACCACAACGACCGAACGCATGTCTCCATCAACCACCAAAACCTCCACCACCACCACTGCCAAACCAACAACAACAAGATCCACAACAACTCAACGTCCTCAGACC
TCONS_00073312	XLOC_033580	pals-37	0	0.464	0.464	0.012472	C54D10.14a.1	j	V:12437466-12441520	-	2	12438325;12441291	12438326;12441292	1;1	TCAGGGA;GTAGTTT
TCONS_00027297	XLOC_010428:lgc-37	lgc-37	0.416	0.874	0.458	0.004976	ZC482.5.1	j	III:12764552-12793171	+	1	12785286	12785292	6	CAGGTTAAGCAG
TCONS_00087693	XLOC_039766:del-5	del-5	0.024	0.468	0.444	0.00307	F59F3.4.1	=	X:11004962-11009070	-	3	11005697;11006754;11007380	11005698;11006759;11007381	1;5;1	GCAGACG;TATTATAGGTC;TTAGACT
TCONS_00089865	XLOC_040708	F41G4.7	0.002	0.435	0.433	0.026489	F41G4.7.1	j	X:16816259-16842977	-	1	16834427	16834511	84	CAGAGCTCTTACAAGCCATCAAGCCACTCTTCGACCAAGTCAAAAAGGAAATGGCCGATCAGCTGGCTGACCAACTTGGAAGATTCCAGG
TCONS_00066346	XLOC_030294:kin-30	kin-30	0.001	0.427	0.427	0.013836	M01B2.1.1	j	V:15228063-15247987	+	2	15245168;15246673	15245179;15246678	11;5	CAGATTTGTTGCAGGAG;CAGAATGCAAT
TCONS_00019994	XLOC_007722	tub-1	0.077	0.495	0.418	0.046155	F10B5.4.1	j	II:8153874-8157320	-	1	8156144	8156186	42	CAGTATGAAAGACTATCCAACATTTGACAACTCGTTGCCGTTTAGCAT
TCONS_00031178	XLOC_011765	srx-45	0.34	0.754	0.415	0.006667	K01B6.2.1	j	III:9300218-9311745	-	1	9306687	9306696	9	GATATGTTTCAGATT
TCONS_00008157	XLOC_003119:F53B6.4	F53B6.4	0.025	0.439	0.414	0.037672	F53B6.4a.1	j	I:8779730-8971031	-	2	8948632;8948978	8948746;8949024	114;46	GAGATGATTTTCTTGAAGATAAGAGTAAACGTGAAGAAATGAGGATAAGGTCGAGGGGTCAACCTTTTAGAAAAAGCAAATGTGATCAATCAATCGATAATAAAAATCAGTTCGAAGTTT;TGAGCAAGTTCTGTCAAGAATTTTTCTCCCGCATTTGGTTTTTCTTCAGAAC
TCONS_00009846	XLOC_003775:M01E5.2	M01E5.2	0.181	0.592	0.411	3.5e-09	M01E5.2.2	j	I:13276955-13286989	-	3	13278501;13278875;13282401	13278502;13278877;13282407	1;2;6	TCAGCTA;TTTAGATG;AAGTTTCAGATC
TCONS_00017264	XLOC_006641:str-179	str-179	0	0.41	0.41	0.079807	F36H5.7	j	II:1746118-1761236	-	2	1747267;1753191	1747269;1753192	2;1	TCCAGGTC;GCAGAAT
TCONS_00024968	XLOC_009581:F23F12.13	F23F12.13	0.547	0.953	0.406	0.010643	F23F12.13.1	j	III:6495676-6500102	+	1	6495816	6495817	1	TCAGATT
TCONS_00030850	XLOC_011636	ZC21.6	0	0.399	0.399	0.093216	ZC21.6a.1	=	III:8532896-8546594	-	1	8544749	8544750	1	TCAGGTC
TCONS_00005380	XLOC_002109	mig-1	0.079	0.476	0.397	0.007576	Y34D9B.1a.1	j	I:948278-957404	-	2	949950;950955	949972;950967	22;12	GAGCCATTCAAAAAGAATTTTGAAGTTC;CAGGATCTACTTTAGACG
TCONS_00081966	XLOC_037417	C33G3.4	0.066	0.447	0.381	0.099161	C33G3.4.1	j	X:14071161-14076296	+	1	14071911	14071912	1	CAGGAAC
TCONS_00011988	XLOC_004516:C16C8.14	C16C8.14	0.064	0.436	0.371	0.09627	C16C8.14.2	j	II:3440815-3454688	+	1	3450182	3450190	8	CAGATTTAAAAATG
TCONS_00082765	XLOC_037809:twk-22	twk-22	0.01	0.38	0.371	0.023966	T01B4.2a.1	j	X:16299897-16317735	+	2	16308615;16312071	16308908;16312213	293;142	ACAGGATAGCTCAGTCGGTAGTGGTGGTCGCTAGCAATCTGGAGGTCACTAGTTCAAGTCCGCCTAGGTTCACCCAGCCTTTATTGAAAAGTAGAGCAATCCACGACTGGATTATCGGTCACAGTCCCCGGCTAGGACGTGGCTAAAAGTATTGCCCAGTGGGAGCACCACTAGGCGGTGTACCTGACTCCCAGAGCCGCAGTGCATAGCGTTTGAGGAACAGATCGTTCTTTAATCCTTGTTTTATAAGACTGAAACTATTTATATCAATGTTATGATTACACTTGGTTTTTCAGAAA;CAGGGATTGCTAGAAATTAAAATTTGTTACATCTCAGTAATGATTAACGGAGCCTTAAAAATGTCGGGCGATGCTGTTAATTTTCCTAGATTTCTCAAT…
TCONS_00050766	XLOC_022160	rdl-1	0.49	0.861	0.371	0.00333	C46A5.8.1	j	IV:7768228-7770476	-	1	7768990	7768996	6	ATATTTCAGGAG
TCONS_00029667	XLOC_011172	pqn-25	0.491	0.853	0.362	0.000598	D1044.3.1	=	III:5506757-5512602	-	3	5509795;5510893;5511699	5509797;5510894;5511701	2;1;2	TTAAGGTG;CCAGCCG;TCCAGAAT
TCONS_00007808	XLOC_002999	K04G2.7	0.001	0.36	0.359	0.009367	K04G2.7a.1	j	I:8044666-8049907	-	2	8047947;8048248	8047948;8048250	1;2	GTAGAAC;TTAAGGAG
TCONS_00008832	XLOC_003358	Y106G6G.4	0.001	0.348	0.346	0.024133	Y106G6G.4.1	j	I:10298139-10327870	-	1	10323354	10323398	44	TTTACCATAACCCCTTTCACCTTTTATAATCCCCTTTCACCTTTCAGATA
TCONS_00043224	XLOC_017853:Y73F8A.26	Y73F8A.26	0.038	0.381	0.343	0.049994	Y73F8A.26a.1	j	IV:15445367-15477512	+	1	15474602	15474604	2	TAGACAAT
TCONS_00012102	XLOC_004560:F19B10.1	F19B10.1	0.131	0.468	0.337	0.022113	F19B10.1.2	j	II:3667178-3685848	+	1	3683177	3683181	4	TTTTCAGATC
TCONS_00008726	XLOC_003314	sys-1	0.036	0.371	0.336	0.062095	T23D8.9c.1	=	I:9980063-9984848	-	1	9982846	9982857	11	AAGTTCAATTTCAGCTA
TCONS_00086585	XLOC_039306:dim-1	dim-1	0.035	0.367	0.331	5.47e-06	C18A11.7a.1	=	X:8050475-8065688	-	1	8057884	8057885	1	TCAGGCT
TCONS_00081516	XLOC_037215:F11C1.4	F11C1.4	0.24	0.568	0.328	0.002017	F11C1.4.1	j	X:12968944-12979889	+	1	12978505	12978581	76	AACATGAATATTTCACCATTTTTGTTGGCATATTTGGTTCTATTTCCACTCCACATTATCAAGTTTACACATGTTCTAGGCA
TCONS_00086858	XLOC_039435	F53A9.7	0.115	0.443	0.328	0.008611	F53A9.7.1	o	X:8716531-8717184	-	1	8716927	8716929	2	TTCAGAAA
TCONS_00046921	XLOC_020181	clp-6	0	0.328	0.328	0.038286	Y77E11A.10.1	j	IV:1430508-1435205	-	2	1431856;1432533	1431857;1432541	1;8	TCAGGTA;AAGTTTTTCAGGAA
TCONS_00083682	XLOC_038119:vpat-1	vpat-1	0.241	0.568	0.327	0.069115	F55A4.8b.1	=	X:1035547-1046532	-	1	1040724	1040725	1	TTAGGGC
TCONS_00083538	XLOC_038076:T19D7.7	T19D7.7	0.025	0.352	0.326	0.071019	T19D7.7.1	j	X:672107-686808	-	1	681436	681437	1	TCAGTAT
TCONS_00028325	XLOC_010725	cht-4	0	0.326	0.326	0.044419	Y22D7AL.14.1	j	III:1653730-1657967	-	1	1656424	1656425	1	TCAGACT
TCONS_00008163	XLOC_003119:F53B6.4	F53B6.4	0.031	0.353	0.323	0.043841	F53B6.4a.1	j	I:8779730-8971031	-	1	8948624	8948746	122	GAGATGATTTTCTTGAAGATAAGAGTAAACGTGAAGAAATGAGGATAAGGTCGAGGGGTCAACCTTTTAGAAAAAGCAAATGTGATCAATCAATCGATAATAAAAATCAGTTCGAAGTTTTGAAGGAA
TCONS_00048810	XLOC_021071:unc-5	unc-5	0.064	0.383	0.319	2.72e-07	B0273.4c.1	j	IV:5495643-5528338	-	1	5499506	5499507	1	TCAGTTG
TCONS_00025978	XLOC_009966	cls-2	0.183	0.501	0.318	0.031646	R107.6a.2	=	III:9055051-9058882	+	1	9058264	9058273	9	CAGTATTTGCAGGAG
TCONS_00049063	XLOC_021244:C55C3.4	C55C3.4	0.001	0.318	0.318	0.062392	C55C3.4.1	j	IV:5676211-5684672	-	1	5681448	5681450	2	TACAGAGG
TCONS_00026925	XLOC_010306	spe-6	0.024	0.339	0.315	0.003353	Y66D12A.20.1	j	III:11505487-11508949	+	1	11508207	11508209	2	CAGAGACA
TCONS_00084861	XLOC_038616:hpk-1	hpk-1	0.134	0.448	0.314	0.000612	F20B6.8a.1	=	X:4204601-4217419	-	1	4214561	4214563	2	TGCAGAAA
TCONS_00065750	XLOC_030029:srsx-19	srsx-19	0.688	1	0.312	0.035657	T22G5.4.1	j	V:13880699-13890295	+	1	13887834	13887835	1	TCAGCAA
TCONS_00028073	XLOC_010644	R06B10.1	0.586	0.898	0.312	0.077197	R06B10.1	j	III:963842-972329	-	2	966874;970871	966876;970874	2;3	TGCAGAAA;TTACAGATG
TCONS_00023885	XLOC_009209	E03A3.10	0	0.312	0.311	0.050874	E03A3.10	j	III:4049076-4052490	+	1	4052267	4052273	6	CAGTTTCAGAAC
TCONS_00076128	XLOC_034845	C14B4.2	0.019	0.328	0.309	0.000217	C14B4.2.1	j	V:19332423-19367333	-	2	19349493;19362669	19349495;19362676	2;7	TTCAGATA;CACTTTCCAGATC
TCONS_00082088	XLOC_037477	jmjd-3.2	0	0.308	0.308	5.05e-06	F23D12.5.1	j	X:14447671-14453885	+	1	14448774	14448905	131	TAGGGGTCGCAACATGCGGCATTTCTTTAAATTTCCTCAAAAGCTAGTAGATTCTCCAATTGTCAGCACAAATGATTCTGAACCAATTAATGAACAAGTTTATTCAACACAAAGTAATCATGGCGAGCTTCAAGATA
TCONS_00088290	XLOC_040021	npr-4	0.002	0.306	0.303	0.004746	C16D6.2a.1	=	X:12536825-12551961	-	6	12538090;12539594;12539804;12540218;12540389;12540591	12538092;12539617;12539806;12540220;12540390;12540593	2;23;2;2;1;2	TTCAGACC;TAGACTCTTCTGAAGTTAGTATTCAGGTA;TTCAGCTG;TGCAGATT;TCAGGGT;TACAGATC
TCONS_00012409	XLOC_004656	lat-2	0.065	0.366	0.301	0.028955	B0286.2b.1	=	II:4359081-4368332	+	1	4366178	4366179	1	CAGTTTT
TCONS_00089389	XLOC_040480	ser-2	0	0.301	0.301	0.080487	C02D4.2e.1	j	X:15286493-15302963	-	2	15289832;15291945	15289833;15292060	1;115	TCAGGTT;TACAAAAAAAGATGATGAATGAAGAACATTTGTCAAGTCTTTTGCTTTAAATCTATGAAAAAAAGAGAAAGCCCACTACTTCCACTCATTCGTTTTCTACTCAACTTGTCTGATTCAGGAA
TCONS_00014561	XLOC_005565:C06C3.4	C06C3.4	0.292	0.592	0.3	0.061382	C06C3.4.1	j	II:9369139-9378315	+	1	9374699	9374721	22	CAGATAAATCAACTGAATTTTTCAGCCG
TCONS_00076700	XLOC_035038	dnj-25	0.012	0.311	0.299	0.000812	W07A8.3a.2	=	V:20729947-20744406	-	2	20736331;20736510	20736337;20736516	6;6	GAGTTTCAGCAC;AAGTTTCAGATT
TCONS_00019578	XLOC_007575	aqp-1	0.367	0.665	0.298	0.0603	F32A5.5a.1	=	II:7232852-7238349	-	1	7237037	7237101	64	TTTGATAATCAGCAGAAACCCTTCTGTTACGAGCAGTCTGCACCCTATCAATCTAACAACATTTCAGAAA
TCONS_00079097	XLOC_036148	nhr-173	0.489	0.782	0.293	0.03511	C56E10.1.1	j	X:6655042-6660323	+	1	6655526	6655527	1	TTAGAAA
TCONS_00084133	XLOC_038320:gcy-31	gcy-31	0	0.292	0.292	0.041729	T07D1.1b.1	j	X:2413751-2427882	-	1	2421614	2421615	1	TCAGCCA
TCONS_00051547	XLOC_022482	del-2	0.11	0.398	0.288	0.01269	F58G6.6a.1	j	IV:9636912-9642084	-	2	9638173;9639187	9638174;9639190	1;3	GAAGGTC;TTTCAGATT
TCONS_00024202	XLOC_009315:F17C8.3	F17C8.3	0	0.287	0.287	0.004938	F17C8.3.1	j	III:4722091-4734088	+	1	4732880	4732887	7	TAGCCACCAGTGA
TCONS_00088783	XLOC_040222	hlb-1	0.125	0.409	0.284	0.085627	T21H8.1g.1	=	X:13865037-13882693	-	3	13866094;13870376;13881020	13866095;13870377;13881022	1;1;2	CCAGATA;ATAGGTA;TTCAGAGC
TCONS_00071754	XLOC_032868	E02C12.8	0.295	0.576	0.281	0.021255	E02C12.8b.1	=	V:9371616-9373804	-	1	9373365	9373366	1	GTAGGGT
TCONS_00081162	XLOC_037038:F55G7.1	F55G7.1	0.043	0.323	0.28	0.098397	F55G7.1.1	j	X:11921251-11927444	+	1	11924439	11924440	1	GCAGGTA
TCONS_00087437	XLOC_039676:rme-4	rme-4	0.483	0.763	0.28	0.079466	F46F6.1a.2	=	X:10373234-10406303	-	1	10374737	10374743	6	TAGTTCCAGAAA
TCONS_00022381	XLOC_008657	acr-20	0.017	0.297	0.28	0.040415	R06A4.10b.1	=	II:14361951-14377890	-	1	14374541	14374550	9	CAGGACGTTCAGACA
TCONS_00071386	XLOC_032704	T23B12.14	0.157	0.435	0.278	0.091638	T23B12.14	o	V:8474132-8485799	-	1	8484440	8484443	3	TTACAGCGA
TCONS_00022806	XLOC_008809:B0353.1	B0353.1	0.022	0.298	0.275	0.00152	B0353.1b.1	j	III:491355-576447	+	1	565560	565568	8	CAGCCATCTCGAAG
TCONS_00061061	XLOC_027840:cdc-25.2	cdc-25.2	0.205	0.475	0.271	0.028638	F16B4.8d	j	V:1567072-1586080	+	1	1582419	1582771	352	ATCAATTTTTTCAACAGCTATAAATTTTAAAACCAAGTTTAACGAACTGTTTTCACCAAAAATTTTTCCTAGAAGGTGTATTTATCTTTCTAATATCAGTCATTCTGCTATCAAATCACCGAAATTTCTGATTTCTGACATTTTCTGCCATTTCCCGTGTTTCGAGACAAAAAACGACCTGAGTAGACCCAAATCTCACCAAGATAGACGTGTCTATTTCTAAATTTTGACCCTCTCTCCCCAGGTGAAAAGTTTCTTTTGGGATGTATTGGGTGGGACCTGAACCGCCTATTCTCAGACCACCAGGCCATCCGTCGTTGCCATTCGTACTCCTTGTGCATTCCAACATTTGCAGAAA
TCONS_00083387	XLOC_038031	C04E7.3	0	0.271	0.271	3.7e-12	C04E7.3.1	j	X:334800-349539	-	1	337532	337681	149	AAGGGAGATACTGTGAACAATCTCAATACTTGTATGCTCCAGCCGCACCCGTCCCCTACCGCAAAAAGGCATGAAAATCCGAGGTCACCGGTTTTTAAAGTTCCAAGAAAATTTGTTTCAAAACGCGAAAATATTCAAGCACTAATATTGAGAAA
TCONS_00074249	XLOC_033958:C53A5.16	C53A5.16	0.337	0.603	0.266	0.000656	C53A5.16a.1	j	V:14518307-14522686	-	1	14522189	14522195	6	TAGTTTGAGGTT
TCONS_00084665	XLOC_038531	C02F12.8	0.365	0.628	0.263	0.065623	C02F12.8.1	=	X:3690142-3713382	-	1	3691676	3691677	1	TCAGAGC
TCONS_00029451	XLOC_011099	set-2	0.182	0.44	0.258	0.007805	C26E6.9b.1	=	III:4847008-4947317	-	1	4925737	4925746	9	AAGCCTTCTCAGACT
TCONS_00077077	XLOC_035193	lmp-2	0.003	0.26	0.257	2.55e-05	C05D9.2.1	j	X:1124934-1128288	+	1	1126832	1126839	7	CAGAAGGACGTGA
TCONS_00015258	XLOC_005875	C05D12.2	0.01	0.265	0.254	1.26e-08	C05D12.2.1	j	II:11410090-11423395	+	1	11421078	11421089	11	CAGTTGATCATCAGAAT
TCONS_00021379	XLOC_008254	shn-1	0.346	0.599	0.253	0.055504	C33B4.3a.1	=	II:11375607-11390998	-	4	11385931;11386216;11388102;11390088	11385932;11386217;11388103;11390089	1;1;1;1	TCAGATG;TCAGGTA;TCAGACA;GCAGGGC
TCONS_00077940	XLOC_035573	aex-4	0.126	0.378	0.252	0.064421	T14G12.2.1	j	X:3729280-3733457	+	1	3730629	3730658	29	CAGAAAAATGACGAGCCCAAAATTGCGACGTAAAG
TCONS_00013297	XLOC_005055	plpp-1.2	0.178	0.428	0.251	0.031589	T28D9.3d.1	=	II:6485676-6491340	+	1	6487441	6487556	115	CCAAAAATGCGAGATCATGTCGAATTCTGTTACTATGTGATCATCTATTCATTGGAAAAATTTCAACAAAGATCGAAGCAATTTGGTATTTCACTATTCATATTTTTCCTTGCCACAGCTG
TCONS_00062489	XLOC_028509	M03F8.3	0.189	0.438	0.249	0.00123	M03F8.3a.1	=	V:5940022-5943362	+	1	5941586	5941595	9	TAGTACTTTCAGGAA
TCONS_00018867	XLOC_007263:F59E12.16	F59E12.16	0.083	0.33	0.247	8.99e-09	F59E12.16c	j	II:5543580-5657371	-	1	5630253	5630259	6	CAGCTTCAGCCG
TCONS_00006788	XLOC_002605:coq-1	coq-1	0.263	0.509	0.246	0.095161	C24A11.9.1	j	I:5412840-5420853	-	1	5415629	5415734	105	TCTCCTGAATGGACAGTTATATCTGTTATCAATGACTCTTTTGGCATTCTCAGAAGCCTCAATTTGCATCATTCACTTTTCAAAAAACTTATCTTCATTCACTTTCAGACC
TCONS_00010154	XLOC_003864:kal-1	kal-1	0.107	0.346	0.239	0.073684	K03D10.1.1	j	I:14128584-14155375	-	3	14130885;14131914;14133028	14130886;14131915;14133029	1;1;1	CCAGATC;GCAGGAA;TCAGTGC
TCONS_00077800	XLOC_035518:F11D5.1	F11D5.1	0.061	0.293	0.232	0.030628	F11D5.1a.1	=	X:3332418-3347302	+	1	3334112	3334114	2	TTCAGCAG
TCONS_00033215	XLOC_012524:elt-6	elt-6	0.16	0.39	0.23	0.049801	F52C12.5.2	j	IV:1902320-1921652	+	1	1914685	1914694	9	CAGTTCTTCCAGACC
TCONS_00050435	XLOC_022025	deb-1	0.152	0.382	0.229	0.008288	ZC477.9c.1	=	IV:7085215-7094370	-	1	7092524	7092526	2	TTTAGGTC
TCONS_00000169	XLOC_000056	icd-2	0.513	0.741	0.228	0.048258	Y65B4BR.5a.1	=	I:535790-536670	+	1	536350	536356	6	CGGTTTAAGGAG
TCONS_00009104	XLOC_003468	dxbp-1	0.287	0.513	0.226	0.029838	Y52B11A.9.2	j	I:11032338-11038898	-	1	11038827	11038857	30	AGCTTTTTCACCTAAAATTCCTAATTTTTTCAGATT
TCONS_00083423	XLOC_038039	ZK1193.2	0.652	0.873	0.221	0.000298	ZK1193.2a.1	=	X:406458-425679	-	1	408154	408507	353	AACGACAAAACCCAGAGGAGGCTGTTAATAGACTTCACGGCAGCCGCCGCGATAGGGTTTCCGGCGGTTGTCGTGACATTTGGTTCACGAAAAGTAAAGCGGTCATACCGCTAGTCTATGACGGCTTTAGCCTACGTAAACCCCTACAGCTTGAATTCAGACTAGAAGAGATATAAATGCCGCAAGTAACTCTCTGGTAAATCTCTTGTCCGCAGCAAGCTTTGTCGACTCACTTTTGACCCCAATGGGCAACCTTTACCTTTACTATTAAGCATTGGTGGGACAAAACCGCGCCATAAACAAATATGACTACAAGAACTGCCACTAATCAAGCTTTATCGTACTCTAGTTTTTAGCTA
TCONS_00008574	XLOC_003249	T05F1.5	0.761	0.98	0.218	0.098449	T05F1.5.1	=	I:9633181-9636097	-	2	9633738;9634268	9633759;9634269	21;1	AGATTTCCAAAAATAACATTTCAGATT;ATAGGGT
TCONS_00009648	XLOC_003704:T07D10.8	T07D10.8	0.019	0.237	0.218	0.014066	T07D10.8	j	I:12591115-12599120	-	1	12598916	12598998	82	CTTCGATTTTTCATAGTTTTCTTCAGCAATTCTTTGATCTTTTTGGCAAAAATAATTATTTTCCGTAAATATACTCGTGTTTCAGCAT
TCONS_00020658	XLOC_007985	fzr-1	0	0.218	0.218	9.38e-16	ZK1307.6.1	j	II:9636627-9646134	-	1	9641204	9641210	6	AAGCTTCAGGTA
TCONS_00011729	XLOC_004396	set-13	0.011	0.227	0.216	0.019334	K12H6.11.1	j	II:2758624-2819187	+	1	2816976	2817065	89	TTTATGGCTAGCTGCCAAAAATCGATTTTTCTTGGCCGGTTGACAACTTTTACCGATTCAAATATATCACCGACTAGCCTAATTTTTTCCAGCAA
TCONS_00005320	XLOC_002090	hgap-1	0.044	0.259	0.215	0.05713	Y18H1A.3e.1	=	I:700273-717280	-	2	703985;713648	703986;713649	1;1	CCAGGTA;TCAGGCT
TCONS_00037309	XLOC_014617	alp-1	0.056	0.269	0.213	0.00041	T11B7.4d.1	=	IV:8852494-8867765	+	1	8860357	8860546	189	TAGTGAGATCATGGTGGTGAGATGATGACAACAACGAGAATTGAAGTTGAAAAGAAGTATCTGTAGGAGATAATTATTCATTTATTTATGTTTATCATCCGGTGTATTTCAGTAGTATTCTAGTCAAATAAAATTGTTCAATGAGCACGCACTCACCATAATTCCATCATATTCTAACAACATTCTATCTAGGTT
TCONS_00060841	XLOC_027738	R09E12.9	0.005	0.215	0.211	0.081411	R09E12.9.1	j	V:777461-778275	+	1	777955	777956	1	CAGCCAT
TCONS_00077355	XLOC_035309:Y102A11A.9	Y102A11A.9	0.019	0.23	0.211	0.003148	Y102A11A.9a.1	=	X:2012936-2025737	+	1	2015555	2015556	1	TCAGAAG
TCONS_00072791	XLOC_033336:des-2	des-2	0.644	0.855	0.211	0.067206	T26H10.1a.1	=	V:11415341-11424532	-	1	11419763	11419764	1	TCAGAGA
TCONS_00000528	XLOC_000170	Y71G12B.2	0.055	0.265	0.21	0.041473	Y71G12B.2.1	j	I:1816088-1823043	+	1	1817969	1817972	3	CAGAAGTTT
TCONS_00053148	XLOC_023104	dli-1	0.345	0.555	0.21	0.003148	C39E9.14b.2	=	IV:13093941-13098836	-	1	13097823	13097829	6	AAGTTTTAGGAA
TCONS_00075395	XLOC_034540	Y20C6A.1	0.028	0.238	0.21	0.08056	Y20C6A.1a.1	=	V:17369714-17377248	-	1	17374451	17374570	119	TAGTCCAATAATCACCCGATCAGCCATCCTTCCGCCTATCAAAACTGAAATAGAAAACGCGGAAGATCATGCCCTCGCCTTGATGATCCACGAGAGCCAAATAATGATCGATATGATTCTAGCAG
TCONS_00005278	XLOC_002079	hum-7	0.615	0.823	0.209	0.0019	F56A6.2b.1	=	I:585830-607603	-	4	588757;592692;601542;603474	588763;592693;601543;603475	6;1;1;1	GAGTTTCAGATG;CCAGGAT;TCAGGCC;TCAGAAA
TCONS_00007639	XLOC_002922	T28F4.1	0.013	0.222	0.209	0.069115	T28F4.1.2	j	I:7422586-7723116	-	1	7474201	7476120	1919	CAGATTTATTTTATCAGTAAATGAGGTGAAAGGAGATTCGAGTTTTGGGAAGCATTTCCTGAACGAAGAGTTATGGATTTCATGTCAGACCTGATAATTTCAATTTGGCTTGATTCTAGCTACAGTATGGCTTTGAATAATCAGGATATCTCAATATTGCAAATGGAACGAAAAAAATTGAGACAAGCTAGCTTTTACTGTTCAAGGATTCTTGCCGATATAAAAAGTGACTCGGAATCTACCATCTACACAAAAGTGTTCCATCTTCAAAATATCAGTCTTATCTTCCTTAAATTTTTGATCTATACTTTTTCTTTCTGGGTGTCCAGGTGTCTGATTCTATAAATAAAGAGGGTTTCCCCGAGATGATAAACACCGGTAACGTTATGTTGCATCATC…
TCONS_00013794	XLOC_005243:nfi-1	nfi-1	0.421	0.627	0.206	0.021979	ZK1290.4c.1	=	II:7534793-7543000	+	1	7542150	7542159	9	AAGTTTCTTCAGCGG
TCONS_00017629	XLOC_006752	tsr-1	0.066	0.272	0.206	0.014675	F53G2.6a.1	=	II:2460838-2473468	-	3	2464111;2465447;2471236	2464113;2465453;2471449	2;6;213	TTCAGATG;AAGTTTCAGGCA;AAAATTCCTAAATTTCTGTGACTTGTGTGCTTCTATCCTAATTGATGGTTTGAATAGTTGGTATTCTCGGCTGAAACATGCAATAAATACCGTATTCCAGCCAACAATTTGTGCAATAGAGCACATTTGTCACCGGGGATGCGGAAGCTATGCCCAAATTTTCATTTTTCACTCAAAAACTTGCAATTTTTTCCATTTTTTCAAATTTTTTTGCAGTCG
TCONS_00009186	XLOC_003498:cutl-10	cutl-10	0.041	0.243	0.202	0.010643	Y53H1B.1.1	=	I:11294328-11307748	-	1	11296240	11296241	1	CCAGCAA
TCONS_00027704	XLOC_010544:toca-2	toca-2	0.538	0.737	0.199	0.00815	K08E3.3a.1	j	III:13752405-13759434	+	1	13759285	13759291	6	AAGTTGCAGGAA
TCONS_00010394	XLOC_003928	mtcu-1	0.589	0.786	0.198	0.016341	F39B2.7.1	=	I:14769652-14775018	-	1	14773937	14773947	10	AGTTAATTTACAGAGC
TCONS_00080343	XLOC_036690	F15G9.1	0.183	0.38	0.197	0.048633	F15G9.1a.1	j	X:9702239-9708563	+	1	9707328	9707362	34	GAATATACTCTTATTTAATAGCATATTTTTCATTCAGAAG
TCONS_00014005	XLOC_005337	T05H10.4	0.002	0.196	0.194	1.91e-07	T05H10.4a.2	=	II:8053111-8054965	+	1	8053755	8053761	6	AAGTTTCAGACA
TCONS_00001447	XLOC_000505	ain-2	0	0.193	0.193	1.42e-20	B0041.2c.1	=	I:4652144-4660264	+	1	4657206	4657212	6	AAGATTCAGAAT
TCONS_00035446	XLOC_013653	sams-3	0.702	0.893	0.191	0.020696	C06E7.1a.1	=	IV:5848169-5859976	+	1	5849225	5849318	93	CAGGCTCTACGGGTGTTGGATGATGCGGGAAACGGGGCTGAAGCTTATCGCAACAATATGTTTCTTTACCTGTTACAACGGTTACTTTGATTACAGAAA
TCONS_00070158	XLOC_032122	snpc-1.3	0	0.191	0.191	0.062221	F08F3.9b.1	j	V:5437083-5439955	-	1	5439166	5439171	5	TAATTCAGAAT
TCONS_00003583	XLOC_001384:tag-68	tag-68	0.134	0.324	0.19	0.010235	F37D6.6.1	j	I:10486700-10505949	+	1	10501585	10501587	2	AACAGAGC
TCONS_00039307	XLOC_015428:Y67H2A.7	Y67H2A.7	0.777	0.966	0.19	7.94e-07	Y67H2A.7a.1	j	IV:13300827-13310818	+	1	13307113	13307338	225	TTTTGACTGACTGAAATTCTAAAAAATCTCAAAATTATTGGAGTTTTTTATTATTATATTTTTTGCGCGCCGAGGTGTGTCGTTTTTTGTTTTTTCAATGTTTTTTTTAGGGAAAATCAAAAAATCGAGAAAATATATTTTTTTTGAAAAAATCGAAAAACCGACACCCTTGGCCGAAAGTTTTTCAAAAATCTAGTGAAATTACGAGACTTTTCCTTGAAATTTCAGATT
TCONS_00071855	XLOC_032915:ZK287.4	ZK287.4	0	0.19	0.19	0.01923	ZK287.4a.1	j	V:9677123-9686717	-	1	9681684	9681685	1	TCAGTTG
TCONS_00029729	XLOC_011202	swp-1	0.125	0.313	0.188	0.006984	B0336.9d.1	=	III:5698429-5705464	-	2	5703109;5705325	5703115;5705364	6;39	TAGTTACAGATT;CTTATGCCTTGCAACTGTTTTAAAAGTAATGTGCATGTTCAGGAA
TCONS_00018222	XLOC_006988:T24E12.10	T24E12.10	0.029	0.217	0.188	0.008442	T24E12.10.1	j	II:3760161-3777606	-	5	3767114;3767215;3767524;3768611;3769050	3767115;3767216;3767533;3768612;3769059	1;1;9;1;9	TCAGTTG;TCAGGTC;TCAATTTTTCAGCCC;TCAGCCG;AAGTAAATTCAGATG
TCONS_00002428	XLOC_000894:F13G3.7	F13G3.7	0.55	0.734	0.184	0.035657	F13G3.7b.2	=	I:7304917-7307010	+	1	7305197	7305206	9	AAGATGTTACAGATG
TCONS_00030708	XLOC_011554	C14B9.8	0.262	0.445	0.182	0.064558	C14B9.8a.1	=	III:8138089-8144691	-	2	8141815;8142020	8141824;8142029	9;9	GAGGATCTTCAGATG;AAGTGTTTGTAGAGT
TCONS_00070836	XLOC_032426	nhr-107	0.78	0.955	0.176	0.022184	C33G8.11.2	=	V:6995214-6997123	-	1	6995901	6995902	1	TAAGGGT
TCONS_00050491	XLOC_022048:best-16	best-16	0.004	0.18	0.176	0.058598	R13A1.9.1	j	IV:7193391-7195926	-	2	7194543;7195117	7194550;7195131	7;14	AAATTTAAAGATC;AAGTGTTGCCCTCTCAGTTT
TCONS_00075724	XLOC_034680:Y37H2C.1	Y37H2C.1	0.051	0.227	0.176	0.062933	Y37H2C.1	j	V:18272563-18350464	-	3	18273355;18274208;18277633	18273356;18274210;18277786	1;2;153	TCAGTTC;TTAAGAGA;AGTGATGGCTGGTACTTTCAGCAACTTGTTTTTGAAATATCTAAATTTCAGCTATAAATAGCGAGTTTTTTCTCGAGATTTTTTCGCTGCTGAAAATGCTCAATGTTTTTGTTTCTGTCTGCATTTTCCCGCTGATTTGCCCTGAAGAGTTTATAGACT
TCONS_00001905	XLOC_000651:vps-34	vps-34	0.271	0.445	0.175	0.093292	B0025.1c.1	=	I:5768918-6033475	+	1	6029772	6029949	177	CACAGTTTTGGTCTATTTTGAAATCTAACAATTGAGAAACTACAATTTCTGTTTCAAAGAATCAATTATTTTATTCGAAAAGCCTTCCATATTATAATTTTCAACCCAAATTAATTCTACTATGATTTAAAATAACCAAACCAATCAAAAAAAATTTTATCTTGAACTTCGAATTTTCAGATG
TCONS_00000400	XLOC_000131	Y92H12BR.7	0.001	0.173	0.172	5.6e-12	Y92H12BR.7.1	o	I:1376941-1405534	+	1	1402092	1402097	5	CAGACGACAAT
TCONS_00073118	XLOC_033488	R07B7.9	0.02	0.192	0.172	0.029124	R07B7.9b.1	j	V:12078029-12080685	-	2	12079122;12079472	12079123;12079473	1;1	TCAGACA;TTAGAAG
TCONS_00076230	XLOC_034867	Y43F8B.1	0.037	0.209	0.172	0.000651	Y43F8B.1c.1	=	V:19534879-19546204	-	2	19535903;19537633	19535904;19537634	1;1	GCAGGTC;TCAGACA
TCONS_00029879	XLOC_011253:npp-10	npp-10	0.344	0.516	0.172	0.040415	ZK328.5b.1	j	III:6013535-6019795	-	2	6019037;6019552	6019043;6019562	6;10	CAGCTTCAGCAT;TTGCAAGTTTCAGCTA
TCONS_00062804	XLOC_028645	ZC487.1	0	0.171	0.171	0.023966	ZC487.1b.2	=	V:6727811-6733092	+	1	6729096	6729102	6	TAGTTTCAGCGA
TCONS_00063916	XLOC_029174:cyp-29A4	cyp-29A4	0.017	0.183	0.166	0.081179	B0331.1.1	j	V:9650479-9658084	+	1	9656040	9656047	7	CAGATTTTGTAGA
TCONS_00002943	XLOC_001094:gls-1	gls-1	0.149	0.315	0.166	0.036442	C36B1.8b.1	j	I:8736211-8742548	+	1	8741189	8741198	9	AAGCTATTGCAGGAA
TCONS_00012348	XLOC_004640:C16A11.10	C16A11.10	0.614	0.779	0.165	0.043992	C16A11.10.1	j	II:4226581-4234620	+	1	4228960	4229547	587	CAGAAAATTCCATTCAAAGAGTTGAGCCGTGCCTTCCGAACTGCAATCTCCCTGGTTTCTCAATGAGAAAATATTTGTTTTTAATTGTTTCTTTTTAATTATCCACATGTTCTATTGATTCCCCCGTGTTTATTTTAATTATCTGCACTTTTAATTTTATCTCTAAGTATTATTTTTTGTCGATAAATACCGTTGATGTTTAATTATTTTAATATTATGTTTTCTTTGTATTCAAATTCAGAAATTGTTTGATCATTTCTCTATATCTTCTTCTTTTTTTCAACGTTTTAATAGCTAAAAATTAACAAAATTTATTGGTGATGATTAATAACCTTTTCGCGTCGAGACCCAAGCCTTAATACCAGCCATGCGCCTTTAAACAAGTTACGGTGCCTCCAC…
TCONS_00063226	XLOC_028846:F40A3.3	F40A3.3	0.011	0.176	0.165	0.062616	F40A3.3c.1	j	V:7877489-7881403	+	1	7877776	7877781	5	CAGAGGTCTCG
TCONS_00084602	XLOC_038500:sax-3	sax-3	0.3	0.465	0.165	0.025904	ZK377.2a.1	=	X:3451944-3483649	-	1	3452927	3452939	12	CAGGATATATTCCAGACA
TCONS_00071502	XLOC_032751:ddn-1	ddn-1	0.837	1	0.163	0.009457	B0507.10.1	=	V:8755852-8764215	-	1	8760193	8760195	2	TTCAGACA
TCONS_00030656	XLOC_011535	npr-17	0.017	0.179	0.162	0.004242	C06G4.5.1	j	III:7990748-7996447	-	4	7991763;7992036;7992448;7992828	7991765;7992037;7992451;7992829	2;1;3;1	CTCAGGTG;TCAGAGC;TTTCAGTTC;CCAGCAC
TCONS_00074541	XLOC_034078:K08F9.1	K08F9.1	0	0.162	0.162	0.049994	K08F9.1a.1	j	V:15134187-15150733	-	1	15138414	15138430	16	TAGGAATTTTAAATTTCAGAAA
TCONS_00084083	XLOC_038298	sav-1	0.012	0.174	0.162	0.034187	T10H10.3.1	j	X:2283917-2290253	-	2	2285031;2287189	2285040;2287310	9;121	TAGTATTTTCAGTGA;GATTTTTTGTCGACTGTCTAAAAATGCATAAATTCATAAAAAGTGATGGCAAAAACTTCTCATCTTTTTATTTGTCTTTCTGCTTTCGTTTCAAGACCCTATTCAATTGTTTTTCTGTTTGCAGTAT
TCONS_00030539	XLOC_011500	cdh-3	0	0.161	0.161	1.86e-11	ZK112.7.1	j	III:7741247-7757487	-	2	7751911;7754463	7751912;7754465	1;2	TCAGATT;TCCAGATC
TCONS_00083979	XLOC_038249	igcm-4	0.004	0.164	0.16	0.053696	Y102A11A.8.1	j	X:2039306-2046360	-	1	2045924	2045925	1	TCAGATT
TCONS_00036729	XLOC_014391:F55G1.6	F55G1.6	0.608	0.767	0.159	0.019066	F55G1.6.1	=	IV:7473476-7477344	+	1	7474155	7474159	4	CAGAAAGTTA
TCONS_00077873	XLOC_035553:rgs-7	rgs-7	0.122	0.281	0.159	0.016788	F56B6.2a.1	j	X:3536402-3557599	+	4	3542539;3546491;3547821;3556431	3542550;3546497;3547830;3556440	11;6;9;9	ATAGTTTCACTCAGATG;TAGTTGCAGGAA;AAGATGCTTCAGGTT;AAGTTTTTTCAGCGG
TCONS_00075912	XLOC_034777:Y17D7B.7	Y17D7B.7	0	0.158	0.158	0.002058	Y17D7B.7	j	V:18780489-18786857	-	3	18781055;18781726;18781805	18781056;18781727;18781806	1;1;1	TTAGCGA;TCAGATA;CCAGAAT
TCONS_00047628	XLOC_020423:Y37E11AM.2	Y37E11AM.2	0.081	0.236	0.155	0.069764	Y37E11AM.2a.2	=	IV:3715788-3726012	-	1	3723529	3723538	9	AAGAATTTCCAGATT
TCONS_00019515	XLOC_007549:farl-11	farl-11	0.19	0.344	0.154	0.046571	F10E7.8a.1	=	II:7099586-7105070	-	1	7104924	7104930	6	TAGTTCCAGTTT
TCONS_00077196	XLOC_035234:H02F09.3	H02F09.3	0	0.153	0.153	0.08844	H02F09.3.1	j	X:1568670-1574118	+	1	1572905	1572914	9	CAGGATCGTCAGTGC
TCONS_00012417	XLOC_004660:ZK430.5	ZK430.5	0.016	0.168	0.153	2.82e-05	ZK430.5.1	j	II:4405454-4419131	+	2	4405864;4415659	4405908;4415966	44;307	GTAATGCATTTCCTCAGCACACCGGACAAGAACAGCAATTGTTTCAGCAA;TAGGTCAAATTGAAGGAAATTTATTCAGCGATCAGTATTCGATCGAAGAATGTACGTATGACGTGGCAGTCGCGCGAAAAGCTCATGTAAAAGAGCGCTTCATGTGTTACCATACTTTTGGCCCACCCTGTAACTGATAAAGAAATTGATTGCTACTTTATGGAATTGATTGATGATTGCTTTGTGAAAACCAAGTCAATTTCTGGAAACAATCAAATTCGGCACTTATCAGAAGCGATGAAGACGGCGAGGGAAAAGGTCGTCCTGAATTATTTGACCGCGGCTTCCGTCGTGATATATGGATTTCCAGTTG
TCONS_00086350	XLOC_039226:twk-17	twk-17	0	0.152	0.152	0.046858	C44E12.3c.1	j	X:7599835-7616861	-	3	7601323;7602981;7603622	7601324;7602982;7603623	1;1;1	CCAGCTC;TTAGGTT;ACAGAGA
TCONS_00006082	XLOC_002327	W05F2.4	0.018	0.169	0.151	5.53e-08	W05F2.4a.1	j	I:3374558-3407865	-	6	3380306;3395956;3396787;3400372;3402591;3402749	3380307;3395958;3396789;3400386;3402592;3402750	1;2;2;14;1;1	TCAGCCA;TTCAGAGA;TTCAGGTG;TATACAACCATTTTCAGTCT;TCAGCTG;TCAGATG
TCONS_00014244	XLOC_005436	aptf-4	0.01	0.158	0.148	0.078837	F28C6.1.1	j	II:8590478-8593693	+	1	8590984	8591008	24	CCATCGATATAATGTTTTTCTTTTTAGAAT
TCONS_00008919	XLOC_003381	row-1	0.054	0.202	0.148	0.017024	F37D6.2a.1	=	I:10474834-10478129	-	1	10476729	10476735	6	AAGTTCCAGAAC
TCONS_00086600	XLOC_039311	catp-5	0	0.147	0.147	0.000106	K07E3.7c.1	j	X:8089796-8101487	-	2	8094368;8096430	8094369;8096432	1;2	AAAGGCA;TGCAGTGT
TCONS_00008301	XLOC_003161	lim-9	0.025	0.17	0.145	0.055087	F25H5.1i.1	=	I:9181810-9220766	-	1	9210337	9210347	10	AAGACATTTTCAGATG
TCONS_00061699	XLOC_028126	slc-28.1	0.717	0.861	0.144	0.080653	F27E11.1a.1	j	V:3450653-3466572	+	1	3463814	3463886	72	TAAACCGGGAAGGAGTTACGATAATGGTTCTTAATAAAAAAGTACACCAAAATAAAGAAAAAAATCTGATTTCAGTTA
TCONS_00064749	XLOC_029571	ccch-1	0	0.14	0.14	8.01e-05	F38B7.1a.1	j	V:11527830-11541219	+	1	11536056	11536064	8	CAGAGTCTCTGCAG
TCONS_00014791	XLOC_005645	lec-3	0.004	0.144	0.14	0.002617	ZK892.1c.1	j	II:9962965-10006085	+	1	9994143	9994276	133	AAATTTCAACCAGTGATGTCCAATCTAACCATCAAGTTTTTGAGTGGCTCCCGATGTTTTTTGTGAAACCGAGAATTTCGGGAATAGCTCAAAAACAAATTCCAACAACTCAAGTTAATATTTCGTATTATTTCAGAAC
TCONS_00030672	XLOC_011538	mdt-30	0.055	0.195	0.14	0.051362	F44B9.7.1	=	III:8025209-8028082	-	1	8027513	8027522	9	AAGCATATTCAGTAA
TCONS_00014505	XLOC_005543:ZK1067.2	ZK1067.2	0.075	0.214	0.139	0.000535	ZK1067.2b.1	j	II:9210218-9223152	+	1	9215213	9215217	4	CAGACCAATT
TCONS_00006859	XLOC_002614	rpl-19	0.026	0.166	0.139	1.93e-06	C09D4.5.2	=	I:5484778-5486354	-	1	5485742	5485756	14	ATATTAATTTTTTACAGGAA
TCONS_00079910	XLOC_036543	F53A9.1	0	0.138	0.138	8.54e-05	F53A9.1.1	o	X:8711315-8711958	+	1	8711590	8711592	2	TTCAGAAA
TCONS_00076790	XLOC_035076:Y73B3A.13	Y73B3A.13	0.04	0.176	0.136	0.061836	Y73B3A.13.1	j	X:117303-139981	+	1	131008	131020	12	AAGTTCCAATTTCAGAAA
TCONS_00084636	XLOC_038518	C18B2.5	0.163	0.298	0.135	0.057338	C18B2.5b.1	=	X:3606667-3611094	-	1	3610198	3610199	1	TCAGCAC
TCONS_00049517	XLOC_021549:pqn-22	pqn-22	0.001	0.136	0.134	0.083486	C46G7.4j.1	=	IV:6018002-6033639	-	1	6027524	6027526	2	TCCAGACC
TCONS_00029815	XLOC_011233	pxl-1	0.03	0.163	0.133	0.004847	C28H8.6a.1	j	III:5889720-5901669	-	2	5894130;5899884	5894292;5899906	162;22	AGAGAAAAGGAGCAGCACACCTTTTTCTTTTCCACGCACACAACACTTTTACCTATCACTTGGCGGAATGATGCGCGAGTTGCAACAACGGCTTGACCATTTCAATGGTCCAAATTATGCACAAAATAGTCATTCAAACCACCAACAACATCATTCGGTTTATAGCTC;GTTCCATGAATTCCATATATTCCAGAGA
TCONS_00032277	XLOC_012173	aakg-1	0.01	0.142	0.132	0.077322	Y111B2A.8a.1	=	III:12537787-12575976	-	1	12540399	12540401	2	TTCAGTGG
TCONS_00029967	XLOC_011282	esyt-2	0.022	0.154	0.131	0.034187	T12A2.15a.1	j	III:6217370-6230970	-	2	6225844;6229402	6226108;6229403	264;1	AGAGATTTTATTCAAAATTGCAGTATTTTTGATTACCCAGAACGAAAAATCTGAGCAGTACGGTGCATTTTGTAGGTCGTTGTTACCTGCCTACAAGTCTTACTATAGATATATCTGCATTATATTATAGTATGCGATTCTCATTATCCAATTTCGATTAATTGTTTTGAAGTTCAACTGCGAACACTTTGGCTATAGGTAGTTATAAAAACCTAATATTCTGATGCAACATGTTATATGCGCAAACTATGAATGAACTAGTTTCAGCAT;TCAGAAG
TCONS_00008393	XLOC_003185	ppfr-1	0.025	0.155	0.13	0.056882	F16A11.3d.1	j	I:9359074-9390689	-	2	9365150;9372067	9365162;9372068	12;1	TAGAATTTTTTGCAGGCT;TCAGGCA
TCONS_00021693	XLOC_008367	pqn-87	0.031	0.158	0.127	0.049533	Y57A10A.18e.2	=	II:12203308-12225086	-	3	12209830;12211173;12215766	12209839;12211182;12215775	9;9;9	AAGGTCCTCCAGGTT;AAGTATCTTCAGGGC;CAGAGTTTCCAGGGC
TCONS_00011399	XLOC_004265:math-44	math-44	0.009	0.135	0.126	0.057176	Y16E11A.1.1	j	II:1930990-1991528	+	1	1987975	1987977	2	CAGACTCT
TCONS_00020053	XLOC_007749	shw-1	0.021	0.147	0.126	0.044665	F14F11.1a.1	=	II:8305615-8321750	-	2	8309321;8310604	8309323;8310606	2;2	TTCAGTGT;TACAGTCC
TCONS_00026031	XLOC_009990	saeg-2	0.007	0.128	0.121	0.000119	T23G5.6.1	j	III:9239246-9242522	+	1	9240337	9240369	32	CATATACACTCAAATCTTAAAATTTAAATTTTCAGCAC
TCONS_00086337	XLOC_039226:twk-17	twk-17	0.022	0.143	0.121	0.056656	C44E12.3c.1	j	X:7599835-7616861	-	4	7601323;7602981;7603466;7603622	7601324;7602982;7603468;7603623	1;1;2;1	CCAGCTC;TTAGGTT;TTCAGTTA;ACAGAGA
TCONS_00088270	XLOC_040018:scd-1	scd-1	0.019	0.141	0.121	0.06747	H20J18.1a.1	j	X:12503884-12525789	-	1	12506413	12506415	2	TTCAGGAA
TCONS_00036540	XLOC_014302	nhr-105	0.031	0.151	0.12	0.001965	C06G3.1b.1	=	IV:7049953-7053450	+	1	7051728	7051776	48	CAGATATGCAAACTGATGAATTTGAGCGAAGGAGACCACAAACTTTTGCAGACA
TCONS_00029628	XLOC_011164	W03A5.6	0.022	0.142	0.12	0.006376	W03A5.6b.1	j	III:5282444-5467992	-	1	5434249	5434467	218	TGTTTTTTATTGCTCCAGTTCTGATTTGATCATTCAAACATTTTTGGGCACAACCTAGCTCAAAATGTATGATCTCCAATATACTATTTTTCAGTCTAATTAATTTTGGCACACATGCTGATTTTTGGCTATTTTTACAAGTAAAAAAAGAAGGAACTAGTGATTTTTTTAAATTTGTTTTTTTTATTACCTTTCCTAAAATTATCCTTGATTTATTATAGCTC
TCONS_00053242	XLOC_023126:Y67H2A.10	Y67H2A.10	0	0.112	0.112	8.15e-05	Y67H2A.10b.1	=	IV:13283001-13297869	-	3	13286102;13288897;13289229	13286111;13288909;13289230	9;12;1	AAGCTTATTAAGAGT;TATGACTACTTTCAGTTA;TCAGCTG
TCONS_00064876	XLOC_029633	D2023.1	0.049	0.16	0.111	0.088269	D2023.1e.1	=	V:11789549-11800640	+	1	11799796	11799846	50	ATTGAATCTCTCTATTCATTTACCAATTTATAACTTAAATTAATATTTTTCAGAAA
TCONS_00038148	XLOC_014944:fmo-1	fmo-1	0	0.11	0.11	0.001098	K08C7.2.2	=	IV:10661856-10665685	+	1	10662017	10662047	30	ATCAGTTTCAGCATTAACGTTACTATTTTCTAGATG
TCONS_00031819	XLOC_012009	zig-5	0	0.109	0.109	0.069103	Y48A6A.1.1	j	III:10951169-11010595	-	2	10951454;10951967	10951455;10951968	1;1	TCAGCAC;TCAGCGC
TCONS_00016982	XLOC_006534	T13B5.9	0	0.108	0.108	0.037378	T13B5.9.1	j	II:1081745-1134240	-	2	1102613;1103561	1102614;1103562	1;1	TTAGAAC;ACAGTTT
TCONS_00072887	XLOC_033384	sipa-1	0.017	0.125	0.108	0.008298	T27F2.2d.1	=	V:11631433-11637291	-	1	11632461	11632467	6	TAGATTCAGATC
TCONS_00064742	XLOC_029571	ccch-1	0	0.107	0.107	0.000481	F38B7.1a.1	j	V:11527830-11541219	+	1	11536056	11536064	8	CAGAGTCTCTGCAG
TCONS_00005794	XLOC_002244	F32B5.7	0.001	0.108	0.107	0.0003	F32B5.7b.1	=	I:2672939-2683011	-	6	2674464;2674886;2676748;2678055;2679328;2679890	2674466;2674887;2676749;2678056;2679346;2679891	2;1;1;1;18;1	TTCAGATG;TCAGTTC;CTAGGTC;TCAGGTT;GGTAGTTTTTTTTGTTTTCAGGAC;CCAGGCC
TCONS_00052992	XLOC_023048	efa-6	0.114	0.221	0.107	0.026938	Y55D9A.1a.1	j	IV:12605697-12621447	-	1	12613623	12613629	6	AAGTTCCAGTTT
TCONS_00070629	XLOC_032340	ZK1055.6	0.866	0.973	0.107	0.030057	ZK1055.6b.1	=	V:6594193-6602604	-	1	6601852	6602099	247	ATTATTTTCAAATCTTTAAAATCGCTATCAAAATATTTTCACGGCGTACCGTACCTAAAAATTCTTCGCGTTTAAGACCATTAGCCATTGTCGGGGAGTTTTCAAATGTTGCCAAGAAAGTTAGAGCTCAGCAGCATCTTTGCAACTTCATTGAAACTTACAACTGTTAGTAACTTATTTTGTAAGTTAACATTGAATTCCTACAATATATAAACTAATGAAATGTTTATTTAAAACTCCAAATTTTCAGAAC
TCONS_00025526	XLOC_009780	npp-15	0.092	0.197	0.105	0.009367	C29E4.4.1	j	III:7929012-7932993	+	1	7929179	7929194	15	TAGATTGGCACGCTTCAGCTC
TCONS_00019907	XLOC_007689:spv-1	spv-1	0.009	0.112	0.103	0.000545	ZK669.1d.1	=	II:7884402-7928700	-	1	7913307	7913308	1	TCAGGTT
TCONS_00024126	XLOC_009288:wdr-48	wdr-48	0.107	0.209	0.102	0.092179	F35G12.4a.1	=	III:4578852-4583893	+	1	4580831	4580840	9	AAGAAATTATAGTGA
TCONS_00022976	XLOC_008880	exc-6	0.107	0.002	-0.104	0.000429	F58B6.2.1	j	III:1103211-1112014	+	1	1104125	1104135	10	CAGACCGATGCAGAAC
TCONS_00002496	XLOC_000913	pbrm-1	0.154	0.047	-0.107	1.12e-05	C26C6.1a.1	j	I:7422586-7723116	+	1	7502605	7502609	4	CAGCAAGGTG
TCONS_00000562	XLOC_000180:tub-2	tub-2	0.11	0.003	-0.107	0.045806	Y71G12A.3a.1	j	I:1862606-1884210	+	1	1881929	1881930	1	TAGAAAC
TCONS_00008208	XLOC_003136	C31H5.6	0.892	0.785	-0.107	0.038286	C31H5.6a.2	j	I:9004496-9057999	-	1	9046575	9046889	314	AATACTGATGTATATCAATGCTTTCCAGTTGTGTCGCAAATTTCATTTTAGATAACTGTGACAAATGTTTATAAAAAAACCACCCTAGCCTTACAATGAATTTATAAAATGAACCCATATCATTCGAAGGAAGACTTTTAAAAAAATTGTTCACTACTTTCGAGGCACTAAAAAATGCTCCAATCGTAGATTTTTGCAGACTCTTTTTTAAATTTTAGAGGTAGCAAAATCCAGAAATCAACCAATTTAAATATCCTATCTATGTTGACTTCCGAGACCATGTGGCTGCTGAGCAAATTCTTCAAAAAAATTTCCAGAAA
TCONS_00075531	XLOC_034598	twk-33	0.114	0.006	-0.108	0.010235	W06D12.5.1	j	V:17710039-17714383	-	2	17711643;17712004	17711644;17712014	1;10	TCAGGTT;TAAATTTTTCCAGAAA
TCONS_00026007	XLOC_009977:ced-11	ced-11	0.115	0.002	-0.113	0.010643	ZK512.3.1	j	III:9103942-9125176	+	1	9120572	9120577	5	CAGGTGCTTCG
TCONS_00008724	XLOC_003314	sys-1	0.142	0.029	-0.113	0.041606	T23D8.9b.1	=	I:9980063-9984848	-	1	9984424	9984428	4	TTTTCAGATT
TCONS_00087207	XLOC_039598	rrc-1	0.134	0.02	-0.115	0.02592	F47A4.3c.1	=	X:9823751-9831764	-	2	9825655;9826079	9825658;9826080	3;1	CAGTAGAAG;TCAGACC
TCONS_00033096	XLOC_012480	K03H6.2	0.165	0.049	-0.116	0.077197	K03H6.2a.1	j	IV:1510545-1515449	+	1	1512627	1512636	9	CAGCATATTCTCAAT
TCONS_00073978	XLOC_033851	T26F2.2	0.128	0.012	-0.116	0.03834	T26F2.2	j	V:13981262-13983241	-	3	13981792;13981983;13982551	13981793;13981984;13982552	1;1;1	CTAGGTC;ACAGAAA;TAAGGTG
TCONS_00021853	XLOC_008453:Y46G5A.43	Y46G5A.43	0.125	0.008	-0.117	0.000102	Y46G5A.43	j	II:12741378-12749574	-	1	12746834	12746916	82	GAAGTTTCTTCGTTAAGATGCAAAGTCTCTCTGACATGTTTTGTATACATGGAAATTTTTTGAGCCTTAACTGAAACATTTTCAGATT
TCONS_00086459	XLOC_039262	adm-4	0.12	0.003	-0.117	1.17e-05	ZK154.7.1	j	X:7795045-7798325	-	1	7797624	7797625	1	TCAGGTC
TCONS_00029878	XLOC_011253:npp-10	npp-10	0.141	0.024	-0.117	0.00179	ZK328.5b.1	j	III:6013535-6019795	-	1	6019552	6019562	10	TTGCAAGTTTCAGCTA
TCONS_00070676	XLOC_032365	W02F12.4	0.194	0.074	-0.119	0.000991	W02F12.4a.1	=	V:6703056-6706932	-	1	6706440	6706452	12	AAGTTTGAATTTCAGCAC
TCONS_00024288	XLOC_009357	eri-9	0.244	0.123	-0.121	0.0091	C26E6.7a.1	=	III:4847008-4947317	+	2	4932548;4933376	4932574;4933382	26;6	TTTGTTTGAACAGTTTCTAATTTTTACAGCGT;AAGTTTCAGAGA
TCONS_00066922	XLOC_030633	T20B3.1	0.123	0.002	-0.121	0.000533	T20B3.1.1	j	V:16814789-16821320	+	1	16818542	16818545	3	CAGGTTTTG
TCONS_00079327	XLOC_036252:syd-9	syd-9	0.128	0.008	-0.121	0.049315	ZK867.1d.1	j	X:7217804-7226868	+	1	7220711	7220973	262	AAAGAGCAGAAGCTGGTTGTGAGAACAATCAAACGAACAAGATAAAAGGATGACGTCATTGAATGTGTGCCTGTGTGTGACATATGTAAAAGTATTTGAAAGAGATTAGGGATTAGGACTACAGTTCTTGATAGACTTGTAATACAAATTAAAAATTGAGACTTCATGTCTTATATAATCCGCGAACAAGATATTCAGCTAGGATCAGACCGGTTTCATATACCCATAGCAAAGTATAATCTTTTTTATGAATTAATAATTTCAGGCA
TCONS_00024712	XLOC_009490	hpo-10	0.363	0.24	-0.123	0.055569	F01F1.1a.1	j	III:5879488-5882923	+	1	5879826	5879845	19	CAGTTCTTCTTTTTCTTTACAGAGA
TCONS_00009269	XLOC_003540	dys-1	0.124	0	-0.124	1.42e-20	F15D3.1h.1	=	I:11517557-11570859	-	3	11528563;11550599;11552153	11528566;11550600;11552155	3;1;2	TTTTAGAAG;TCAGCGA;TGCAGATC
TCONS_00085055	XLOC_038699	K02G10.5	0.124	0	-0.124	0.051102	K02G10.5d.1	j	X:4684877-4691718	-	2	4689238;4689995	4689239;4689996	1;1	TCAGCCT;TAAGAAT
TCONS_00068929	XLOC_031523	zig-11	0.213	0.089	-0.124	0.03101	Y32G9A.8a.2	=	V:1872245-1893038	-	1	1879843	1879853	10	TCAAGTTTTTCAGGTG
TCONS_00004462	XLOC_001781:acox-1.1	acox-1.1	0.254	0.125	-0.128	0.020523	F08A8.1c.1	j	I:12937919-12946717	+	1	12938555	12938561	6	CAGTTTTAGTAT
TCONS_00070496	XLOC_032271	K12B6.8	0.128	0	-0.128	0.003433	K12B6.8	j	V:6308717-6312245	-	2	6310172;6311488	6310173;6311489	1;1	TCAGCAA;TCAGAAC
TCONS_00031558	XLOC_011909:ZK1128.1	ZK1128.1	0.907	0.778	-0.128	0.04083	ZK1128.1.1	j	III:10109422-10114826	-	1	10114366	10114367	1	TCAGGGT
TCONS_00085070	XLOC_038702:dnj-14	dnj-14	0.243	0.113	-0.13	0.033169	K02G10.8b.1	j	X:4707059-4712154	-	1	4711742	4711744	2	TTCAGGGA
TCONS_00036782	XLOC_014413:cla-1	cla-1	0.154	0.023	-0.131	0.003231	F45E4.3a.1	=	IV:7588849-7629042	+	1	7621014	7621015	1	CCAGGAT
TCONS_00086339	XLOC_039226:twk-17	twk-17	0.131	0	-0.131	0.088269	C44E12.3c.1	j	X:7599835-7616861	-	4	7601323;7602981;7603466;7603622	7601324;7602982;7603468;7603623	1;1;2;1	CCAGCTC;TTAGGTT;TTCAGTTA;ACAGAGA
TCONS_00009198	XLOC_003505	M04D5.3	0.233	0.102	-0.131	0.038439	M04D5.3.1	j	I:11339786-11341578	-	1	11341038	11341040	2	TTCAGAAC
TCONS_00079997	XLOC_036582	acs-22	0.857	0.722	-0.135	0.081725	D1009.1c.1	=	X:8930116-8939263	+	1	8936132	8936623	491	AAATACTTAAAAATGGTACTATTTTCGTTTCAAATAATATTATCGCTTTCAAGTTCAGTCAATGGAAAAAATTAAAACATTTTTGAAACGTTTTAATATGATTTTTTATAATTTTGCACTATAAGAATGTGTTTCAATAAAAATATTCCACCTCGAATATACATTTCTAACGAGCTAGAACTTTTGTAATATTCATTTGAAATTCTGAAGATAAAATAAAGATAATGCTGGATTAAGTTATTCCTGCTTTATTGTTGTAACGTGTATTGACTAGGACACAATTTATCTGTTCTGATTTTCTGATTTATCATTACTTCTTGATAAACAACTGGTGGCCTTCAAAACTTGGGTTCACATCGTACGTAAAAACGGTAATTGTAATCAAACTAAAGAATTTAA…
TCONS_00016210	XLOC_006265	nurf-1	0.254	0.117	-0.137	0.069909	F26H11.2b.1	=	II:14390717-14407905	+	1	14397085	14397091	6	CAGTTCCAGAAT
TCONS_00027661	XLOC_010528	set-16	0.213	0.072	-0.14	0.052685	T12D8.1.1	j	III:13643748-13656777	+	2	13644185;13649498	13644196;13649506	11;8	CAGAAAATTTGCAGTGT;AAGATTTTCAGCGT
TCONS_00076235	XLOC_034867	Y43F8B.1	0.158	0.017	-0.141	0.064109	Y43F8B.1d.1	j	V:19534879-19546204	-	3	19535903;19537633;19545703	19535904;19537634;19545775	1;1;72	GCAGGTC;TCAGACA;CAGTAATTGTGGTAACCCTGAAGAAACGGCCTACTTCTACTACTACTACTACTACCCAACAAGAAACTTCTTCAGGAG
TCONS_00079881	XLOC_036530:rig-1	rig-1	0.332	0.19	-0.142	0.037754	K09E2.4a.1	j	X:8647974-8681738	+	1	8661276	8661278	2	TTCAGAGG
TCONS_00008350	XLOC_003166	F36H2.3	0.142	0	-0.142	1.5e-06	F36H2.3h.1	j	I:9250658-9261880	-	3	9255766;9257134;9258996	9255767;9257136;9258997	1;2;1	TCAGGAA;TTAAGATC;TCAGTCG
TCONS_00086735	XLOC_039368	wrk-1	0.205	0.06	-0.144	0.022667	F41D9.3b.1	j	X:8387447-8402099	-	4	8391100;8391333;8392223;8392582	8391106;8391357;8392224;8392588	6;24;1;6	TAGTTTAAGGCT;CAGTTTTCAAACCCACTCAAGTTTCAGTTA;TCAGACA;TTTTTTCAGCAT
TCONS_00053062	XLOC_023073:ZK896.3	ZK896.3	0.163	0.014	-0.149	0.069673	ZK896.3	j	IV:12880628-12886309	-	2	12885308;12886010	12885310;12886011	2;1	TTGAGAAA;TCAGCTT
TCONS_00007339	XLOC_002805	lbp-5	0.151	0	-0.151	3.58e-05	W02D3.7.1	j	I:6731266-6733863	-	1	6732270	6732280	10	TCCAAATTTTCAGAAT
TCONS_00031297	XLOC_011806	ced-7	0.685	0.529	-0.156	0.061456	C48B4.4b.1	=	III:9568750-9595810	-	1	9576846	9576852	6	AAGATTCAGATG
TCONS_00018701	XLOC_007197	pmt-1	0.698	0.542	-0.156	0.079807	ZK622.3a.2	=	II:5278136-5288991	-	1	5280279	5280455	176	CATTTTTTTTGCTTATACGGTGTGCGTGTTTCTGTTTTCCCATACCAAATCGTCTCCTCGTAGTCTCATTATGTCGCCGAGCTTGTTTGCTTTGGTGACCAGGAGAAAAACAAGTGCAAACATACTGTCATTGTTCAAAAGGAACCGGCAAGGCTGCTCAATTTTATCATTATTTTCAGAGC
TCONS_00062181	XLOC_028345	F26G5.1	0.797	0.639	-0.158	0.096457	F26G5.1b.1	=	V:4943115-5053490	+	1	4975878	4975884	6	TAGTTTCAGGTT
TCONS_00087854	XLOC_039828	slo-2	0.396	0.237	-0.159	0.03796	F08B12.3c.1	=	X:11393292-11405931	-	1	11399542	11399543	1	TCAGTGC
TCONS_00082516	XLOC_037696	K09A9.6	0.218	0.058	-0.16	0.061439	K09A9.6b.1	j	X:15577247-15603763	+	1	15580956	15580966	10	TAGGGTGGCGCACGCA
TCONS_00076369	XLOC_034931:Y60A3A.24	Y60A3A.24	0.169	0.009	-0.16	0.064109	Y60A3A.24.1	=	V:19978619-19990629	-	1	19981597	19981598	1	ACAGAAT
TCONS_00015593	XLOC_006009:ife-5	ife-5	0.22	0.059	-0.161	0.017734	Y57A10A.30.1	=	II:12269814-12284133	+	1	12282880	12283360	480	CGGAACTTTTCGAGACGTCAACTTACACCGGCTTTCTTTACAGGTTGAGACCAAACGTTCCAAAACCCAACCGCTCGCCACTGTTCCGGCGGTACAGGGTACGGAAATCACCATAGATTGAGCTAAACGCCGGTCTATTCCTACATCTCACCACACAAGGACCGTACCCCATTGTTGATCTCTCGTTCACACCGCTTATCCTCCTCTTCGCTCGGCACTCTGCAAACGCCAGTTCTCTCTTAGACTCTTCTTCCGGCTTGACCCCAGTTGCGGCTCCCCAACCCGCTACACTGGGCGGTCAACACTTTTTTCGAAATTTTAACTGGCCATAAAAAAATTTTGGAAATTTTTTGAGAAGTCTCATTATGAAATTTGGTAGTTTTGGACCATTATGAGTCT…
TCONS_00011536	XLOC_004318:ZK1240.3	ZK1240.3	0.211	0.051	-0.161	0.086752	ZK1240.3a.1	j	II:2318185-2321951	+	1	2320571	2320574	3	CAGAATGCG
TCONS_00088594	XLOC_040151:cyp-13B1	cyp-13B1	0.161	0	-0.161	0.002884	F02C12.5.1	j	X:13406673-13411285	-	2	13407243;13408948	13407244;13408949	1;1	TCAGCGC;TTTAGAA
TCONS_00016160	XLOC_006243	efhd-1	0.172	0.01	-0.162	0.044164	Y48B6A.6a.2	j	II:14178813-14190020	+	1	14184107	14184112	5	CAGAAACCATC
TCONS_00070817	XLOC_032425:nhr-161	nhr-161	0.948	0.778	-0.17	0.001361	C33G8.7.1	=	V:6980594-6992330	-	1	6981708	6981709	1	TCAGAAG
TCONS_00021287	XLOC_008219:F37H8.2	F37H8.2	0.173	0.002	-0.171	3.66e-06	F37H8.2.1	j	II:11170562-11177719	-	2	11173628;11174760	11173630;11174761	2;1	TATAGATA;ACAGATC
TCONS_00046776	XLOC_020133:egrh-2	egrh-2	0.172	0	-0.172	0.000179	Y55F3AM.7b.1	=	IV:984404-990798	-	2	984812;989577	984822;989580	10;3	CAGCAGCGTTCAGGGT;TTTCAGGTT
TCONS_00001078	XLOC_000373	Y47G6A.5	0.243	0.07	-0.173	0.000612	Y47G6A.5a.1	j	I:3533085-3539549	+	1	3533885	3533974	89	AACAGTGTGTGTGTGTGTAAATGGAAAGAGAGAGAGGAGTTTCAGAGTGTGCTCTCTCTCTCTCTCTCTTTTTTTTTGGGAAAGTCAGTCAGTTT
TCONS_00021684	XLOC_008367	pqn-87	0.364	0.191	-0.173	0.073593	Y57A10A.18e.1	j	II:12203308-12225086	-	2	12215766;12221789	12215775;12221791	9;2	CAGAGTTTCCAGGGC;TCCAGTAA
TCONS_00032191	XLOC_012143	Y75B8A.24	0.262	0.089	-0.174	0.00044	Y75B8A.24.1	j	III:12251459-12273903	-	2	12263746;12264111	12263748;12264112	2;1	TGCAGACT;TCAGACA
TCONS_00049521	XLOC_021549:pqn-22	pqn-22	0.238	0.062	-0.175	5.71e-06	C46G7.4a.1	=	IV:6018002-6033639	-	1	6027524	6027526	2	TCCAGACC
TCONS_00017528	XLOC_006721:K09F6.6	K09F6.6	0.226	0.051	-0.175	0.00212	K09F6.6.1	j	II:2254751-2308361	-	2	2291299;2291591	2291300;2291601	1;10	TCAGATA;TAGTTATTTGAAGGAA
TCONS_00074286	XLOC_033969	R11H6.6	0.232	0.055	-0.177	0.041729	R11H6.6	o	V:14591185-14593781	-	3	14592674;14593207;14593465	14592675;14593210;14593468	1;3;3	TCAGCGA;TTTTAGGTT;TTTCAGCGA
TCONS_00089637	XLOC_040601	ZK1073.1	0.904	0.719	-0.184	0.056882	ZK1073.1.1	j	X:16123938-16133907	-	1	16128815	16128865	50	TTTAGTTCATTTATTTCTCACGCGTGACTGTGACTTTTTTTGTTTGCTTCCAGAAA
TCONS_00051695	XLOC_022546	dur-1	0.21	0.025	-0.185	0.009705	F25H8.5k.1	j	IV:9916529-9929792	-	2	9924651;9924758	9924652;9924759	1;1	TCAGAAG;TCAGATA
TCONS_00007876	XLOC_003024	kin-10	0.567	0.381	-0.186	0.024709	T01G9.6a.2	=	I:8288958-8291077	-	1	8290429	8290432	3	TAGAAGATG
TCONS_00088380	XLOC_040048:gei-3	gei-3	0.448	0.261	-0.187	0.094752	T22H6.6a.1	j	X:12705623-12816045	-	3	12810406;12811113;12811299	12810408;12811114;12811300	2;1;1	TTCAGACC;GCAGGTG;TCAGTTA
TCONS_00085726	XLOC_038979:C03B1.13	C03B1.13	0.215	0.027	-0.188	0.007843	C03B1.13.1	j	X:6326190-6345842	-	3	6336305;6336473;6336632	6336314;6336475;6336633	9;2;1	AAGAGTTTTTAGGGC;TGTAGAAA;GCAGCAA
TCONS_00024439	XLOC_009413:pqe-1	pqe-1	0.302	0.112	-0.189	0.008611	F52C9.8b.1	=	III:5282444-5467992	+	1	5315809	5315815	6	CAGTTTCAGAAG
TCONS_00017628	XLOC_006752	tsr-1	0.463	0.271	-0.192	0.039813	F53G2.6a.1	j	II:2460838-2473468	-	2	2464111;2471236	2464113;2471449	2;213	TTCAGATG;AAAATTCCTAAATTTCTGTGACTTGTGTGCTTCTATCCTAATTGATGGTTTGAATAGTTGGTATTCTCGGCTGAAACATGCAATAAATACCGTATTCCAGCCAACAATTTGTGCAATAGAGCACATTTGTCACCGGGGATGCGGAAGCTATGCCCAAATTTTCATTTTTCACTCAAAAACTTGCAATTTTTTCCATTTTTTCAAATTTTTTTGCAGTCG
TCONS_00088774	XLOC_040222	hlb-1	0.206	0.011	-0.195	0.037754	T21H8.1h.1	j	X:13865037-13882693	-	2	13866094;13870376	13866095;13870377	1;1	CCAGATA;ATAGGTA
TCONS_00028724	XLOC_010843:H06I04.6	H06I04.6	0.473	0.275	-0.198	0.022539	H06I04.6b.1	j	III:3061191-3085268	-	2	3062885;3064341	3062886;3064456	1;115	TCAGATG;TTTTTTGACAGATGACGACGCCCCGTCTTTTCTCGAATTTTCGATTTGTGTTTTGCGCAAATCGAAAATTTTCCTTATCTTCTCAGCGAATCACCTTGACTGAAAATCTATTTTCCAGGGT
TCONS_00076127	XLOC_034845	C14B4.2	0.218	0.019	-0.199	0.058873	C14B4.2.1	j	V:19332423-19367333	-	1	19349493	19349495	2	TTCAGATA
TCONS_00022074	XLOC_008527	tbc-14	0.395	0.195	-0.2	0.080023	E01G4.1b.1	=	II:13437578-13448198	-	1	13440909	13440911	2	TCCAGAAA
TCONS_00052673	XLOC_022918:unc-22	unc-22	0.215	0.015	-0.2	0.073684	ZK617.1g.3	=	IV:11970533-12011009	-	1	11972863	11972916	53	TTTCTCACGATTTTTTCCATTGTATGCGTTCTGAAATTTGACTTGAAAATTTTCTGCTT
TCONS_00073503	XLOC_033664	C44H9.5	0.271	0.069	-0.201	0.096414	C44H9.5b.1	=	V:12845998-12852552	-	2	12847493;12847784	12847502;12847785	9;1	CAGGATCTGCAGGTG;TCAGACA
TCONS_00076534	XLOC_034981:F53H2.3	F53H2.3	0.358	0.155	-0.203	0.056882	F53H2.3b.2	j	V:20396070-20431337	-	1	20422033	20422035	2	TTCAGGCG
TCONS_00039308	XLOC_015428:Y67H2A.7	Y67H2A.7	0.213	0.009	-0.204	0.045054	Y67H2A.7a.1	=	IV:13300827-13310818	+	1	13307113	13307338	225	TTTTGACTGACTGAAATTCTAAAAAATCTCAAAATTATTGGAGTTTTTTATTATTATATTTTTTGCGCGCCGAGGTGTGTCGTTTTTTGTTTTTTCAATGTTTTTTTTAGGGAAAATCAAAAAATCGAGAAAATATATTTTTTTTGAAAAAATCGAAAAACCGACACCCTTGGCCGAAAGTTTTTCAAAAATCTAGTGAAATTACGAGACTTTTCCTTGAAATTTCAGATT
TCONS_00073601	XLOC_033717	max-1	0.217	0.012	-0.205	0.052075	C34B4.1b.1	=	V:13098909-13113886	-	1	13103677	13103705	28	TTTGATTCATCTTCTCATTGTGTTTTTTCAGCTC
TCONS_00076413	XLOC_034943	fre-1	0.256	0.045	-0.211	0.032666	Y113G7A.8b.1	=	V:20075919-20087739	-	1	20080319	20080330	11	TAATTTTTTTTCAGGTA
TCONS_00089159	XLOC_040385	epn-1	0.318	0.105	-0.213	0.046185	T04C10.2b.1	=	X:14815827-14818701	-	1	14818171	14818172	1	GCAGGTC
TCONS_00035793	XLOC_013871	zen-4	0.226	0.011	-0.215	0.000106	M03D4.1d.1	j	IV:6117750-6127302	+	1	6118219	6118221	2	TTCAGAAA
TCONS_00086425	XLOC_039246	kvs-1	0.231	0.016	-0.215	0.002457	C53C9.3b.1	j	X:7690507-7713655	-	4	7691835;7693122;7694433;7694565	7691836;7693123;7694434;7694566	1;1;1;1	TCAGCTG;TCAGTGG;GCAGATA;ACAGGAG
TCONS_00007256	XLOC_002773:mdt-18	mdt-18	0.286	0.071	-0.215	0.002112	C55B7.9a.2	=	I:6490715-6496109	-	1	6493847	6494246	399	AAAAATGTTAAAAAGTAACAATTTCCGAAAGCGCAATTTAAAAAAGTACAAAAAAGTACAAACTTTTATGGAGACACTACTGATTTCTGGAATCTGTTAAATCTTAGAAATGAACTCTTTCAGAATTTCAAACTTCTTTTTTTATATGCGTAAAACTTATCGCATATATTTTATGCAATATTGAAAGTAAGTAGAGTTTTAACCATTAAAGTAACTGAAACCAGAGTTTTATCGTAAAAATGGTAAAATATTCGGGAGTGTTGGTTTCCCTGGAAATGAGTCACGTAGAGTGTGAGTCCGCAAACACCAGCTGTGAATTGCGTAGAATACATTTAATATCACGCTCAAATAGTTTTGAATTAATTTAATTTTTTAAAAACATTTTTTATTCTGTTTATT…
TCONS_00000719	XLOC_000223	zeel-1	0.296	0.075	-0.221	0.030054	Y39G10AR.5.1	j	I:2340099-2350660	+	1	2344099	2344100	1	GCAGTCT
TCONS_00008913	XLOC_003378	duo-3	0.829	0.608	-0.221	0.057407	Y106G6H.12a.1	j	I:10464327-10471960	-	1	10468519	10468520	1	TCAGCCT
TCONS_00031748	XLOC_011984:Y39A1A.21	Y39A1A.21	0.59	0.367	-0.223	0.099166	Y39A1A.21a.1	=	III:10700651-10707173	-	1	10701715	10701717	2	TTCAGATT
TCONS_00087435	XLOC_039676:rme-4	rme-4	0.246	0.021	-0.225	0.004376	F46F6.1a.2	=	X:10373234-10406303	-	1	10374737	10374743	6	TAGTTCCAGAAA
TCONS_00030701	XLOC_011549	gei-8	0.574	0.343	-0.232	0.030245	C14B9.6a.3	=	III:8108702-8126222	-	1	8112956	8112957	1	TTAGGAA
TCONS_00037308	XLOC_014617	alp-1	0.527	0.292	-0.235	0.002017	T11B7.4b.1	=	IV:8852494-8867765	+	1	8860357	8860546	189	TAGTGAGATCATGGTGGTGAGATGATGACAACAACGAGAATTGAAGTTGAAAAGAAGTATCTGTAGGAGATAATTATTCATTTATTTATGTTTATCATCCGGTGTATTTCAGTAGTATTCTAGTCAAATAAAATTGTTCAATGAGCACGCACTCACCATAATTCCATCATATTCTAACAACATTCTATCTAGGTT
TCONS_00028935	XLOC_010921	F34D10.6	0.238	0.002	-0.236	1.29e-05	F34D10.6a.1	j	III:3745460-3759412	-	2	3749746;3754790	3749747;3754791	1;1	GCAGAAG;CCAGGAA
TCONS_00051558	XLOC_022485	nhr-34	0.468	0.228	-0.24	0.095688	F58G6.5c.1	j	IV:9657792-9675699	-	1	9666365	9666366	1	TTAGCCG
TCONS_00069764	XLOC_031947:nhr-125	nhr-125	0.303	0.058	-0.245	0.091943	R02D1.1a.1	j	V:4320362-4325623	-	3	4321013;4322766;4324739	4321014;4322773;4324741	1;7;2	TCAGATC;TAGTTTTCAGATA;TTCAGAGT
TCONS_00082763	XLOC_037809:twk-22	twk-22	0.272	0.024	-0.248	0.043133	T01B4.2a.1	j	X:16299897-16317735	+	3	16308615;16312071;16313296	16308908;16312213;16313299	293;142;3	ACAGGATAGCTCAGTCGGTAGTGGTGGTCGCTAGCAATCTGGAGGTCACTAGTTCAAGTCCGCCTAGGTTCACCCAGCCTTTATTGAAAAGTAGAGCAATCCACGACTGGATTATCGGTCACAGTCCCCGGCTAGGACGTGGCTAAAAGTATTGCCCAGTGGGAGCACCACTAGGCGGTGTACCTGACTCCCAGAGCCGCAGTGCATAGCGTTTGAGGAACAGATCGTTCTTTAATCCTTGTTTTATAAGACTGAAACTATTTATATCAATGTTATGATTACACTTGGTTTTTCAGAAA;CAGGGATTGCTAGAAATTAAAATTTGTTACATCTCAGTAATGATTAACGGAGCCTTAAAAATGTCGGGCGATGCTGTTAATTTTCCTAGATTTCTCAAT…
TCONS_00081378	XLOC_037148:tbc-13	tbc-13	0.999	0.746	-0.253	0.074991	F45E6.3.1	j	X:12313017-12501748	+	1	12488507	12488609	102	CAGCAATTTTTTGAGTATTCCTACAAGTTTTCACAAGAGTCTTTAGTCTTTAGAAAAAATTGTTTCAATTTAATGCCAAACATACTAAATCAATTTATTATTAAGATT
TCONS_00080345	XLOC_036690	F15G9.1	0.794	0.534	-0.259	0.000126	F15G9.1a.1	=	X:9702239-9708563	+	1	9707328	9707362	34	GAATATACTCTTATTTAATAGCATATTTTTCATTCAGAAG
TCONS_00067037	XLOC_030677	F49H6.5	0.266	0.007	-0.26	0.001397	F49H6.5a.1	j	V:16922098-17120791	+	2	17023473;17024381	17023475;17024395	2;14	TACAGATG;AAGTTGCCTCGATTTAGATA
TCONS_00012400	XLOC_004654:athp-2	athp-2	0.689	0.424	-0.265	0.011865	H20J04.2.1	j	II:4328812-4353159	+	1	4340151	4340182	31	AAAATGCACTATAATTTTCCCCCAATTTTAACAGAAC
TCONS_00026643	XLOC_010218	fmo-3	0.721	0.456	-0.265	0.01997	Y39A1A.19a.1	=	III:10692075-10698865	+	1	10696029	10696030	1	GCAGTGT
TCONS_00050434	XLOC_022025	deb-1	0.795	0.525	-0.27	0.00698	ZC477.9a.1	=	IV:7085215-7094370	-	1	7092524	7092526	2	TTTAGGTC
TCONS_00081599	XLOC_037241:F09A5.2	F09A5.2	0.823	0.549	-0.274	0.004607	F09A5.2.1	j	X:13130022-13139777	+	1	13138400	13138490	90	TAGAATCGTGTACATATTGAATTATGTATAAGTATATACAAGTTCAAATTAAAACTTAGACCGAACATTGAGATTTCAAAAATCAGTTTCCAGAAC
TCONS_00005324	XLOC_002090	hgap-1	0.691	0.415	-0.276	0.038439	Y18H1A.3e.1	j	I:700273-717280	-	2	703985;713648	703986;713649	1;1	CCAGGTA;TCAGGCT
TCONS_00071231	XLOC_032623:Y97E10AR.6	Y97E10AR.6	0.49	0.202	-0.288	0.010419	Y97E10AR.6.1	j	V:8006166-8024940	-	2	8012292;8013950	8012293;8013951	1;1	TCAGAAA;CAGAGAA
TCONS_00012635	XLOC_004755:shc-2	shc-2	0.497	0.208	-0.289	0.058592	T27F7.2b.1	=	II:4969167-4993968	+	1	4972854	4972855	1	GCAGAAT
TCONS_00086215	XLOC_039182	mnm-2	0.614	0.314	-0.3	0.061032	C10A4.8.1	=	X:7420870-7426569	-	1	7422900	7422901	1	TTAGGTG
TCONS_00026032	XLOC_009990	saeg-2	0.306	0	-0.306	5.1e-09	T23G5.6.1	j	III:9239246-9242522	+	1	9240337	9240369	32	CATATACACTCAAATCTTAAAATTTAAATTTTCAGCAC
TCONS_00064082	XLOC_029251	C08B6.11	0.776	0.466	-0.31	0.061456	C08B6.11.1	j	V:10107619-10113608	+	1	10108100	10108105	5	TAGTTCAGGAA
TCONS_00058681	XLOC_026487:gln-3	gln-3	0.772	0.463	-0.31	0.042113	Y105C5B.28b.1	=	IV:16167742-16170859	-	1	16169129	16169130	1	CCAGCCA
TCONS_00006864	XLOC_002618:zipt-11	zipt-11	0.733	0.418	-0.315	0.028656	F59A3.4.1	j	I:5497678-5511705	-	1	5509170	5509172	2	TTCAGCAT
TCONS_00037884	XLOC_014825:ent-7	ent-7	0.404	0.088	-0.316	0.000105	F44D12.9a.2	=	IV:10017424-10021286	+	1	10019016	10019263	247	AAATGACTAAACACATGCAACAAGAAGAAGAAGGCTCTCCCTTATCTTATTTTCAATGTATTTTCACATAAAATTTCGTTGTTCATAATATAAAAATCTGTAGATCTTCATGTAGAGTATAATATTTGTAATGGCAGAAAATGGGGGCAAACAACCCTGTGGGTACTAAAAATATACCAAAATTAACATTTATCAAATTCGTACCTGATAAAACCGTAAACTTGAAGCATATTGAATCAGTAACTTTCAGCAA
TCONS_00018365	XLOC_007052	ntl-2	0.529	0.211	-0.318	0.058128	B0286.4b.1	=	II:4372739-4386343	-	1	4374698	4374699	1	TCAGCTA
TCONS_00022228	XLOC_008594	zip-3	0.47	0.153	-0.318	0.000553	W07G1.3.1	=	II:13946738-13957543	-	1	13955990	13955992	2	TCCAGTGA
TCONS_00087377	XLOC_039655:C14H10.3	C14H10.3	0.402	0.079	-0.322	0.008908	C14H10.3b.1	j	X:10220643-10236950	-	1	10224340	10224525	185	GGTTTTGTGGGCCTTTGCGTGTCTGAGTGTGTCAATTTCTAGAAGGAGTGAAAAAGGGAAATGTATGCTTGTCCCAAGGGAACGTCGACACTTCTTTGTTCAACATGTTTCGCGCCCACACATACACAAGTGTCCACAAAATTTATTCGCACCTTAACATGCGGCCATTATTATTTGTGAAATTTCAGCAA
TCONS_00025654	XLOC_009836:fbxl-1	fbxl-1	0.684	0.359	-0.325	0.002424	C02F5.7a.3	j	III:8226477-8235543	+	1	8229286	8229790	504	GGTGGCCAGGTGTTCTGTTTAGTGTCAGATTCATTCTCAACCTTTATCGATGTCTTTATTGGTTACGCTTCTGGTTTCTGGGTAACCACCGCTCTCACTGAAGTTCGTTCTGTTTTGCTCGCAGATATTTCAAAACTTCACTGCCAATGACGGAAAAAATATTTTAATGAAATTTTATAATATGTCCCATTTTGACACTGTTGTAAATAGAAAATTTCTGAAAATATTCAAATTTTCTTCGTTTTCGTGGCAAATCTTAAATATTTATCATCTCCTAAATATGTGAGCTAATTGGATTTTTTGAATAAGAGACTAATGAATGATTATATCTGTGCATCCTATTTTTCATCGAATTTCCGCTCTGACGTCAGTAACTGCAGTAAACACGCTCACTTTTCC…
TCONS_00019577	XLOC_007575	aqp-1	0.497	0.171	-0.326	0.000651	F32A5.5a.1	j	II:7232852-7238349	-	1	7237038	7237101	63	TTTGATAATCAGCAGAAACCCTTCTGTTACGAGCAGTCTGCACCCTATCAATCTAACAACATTTCAGAA
TCONS_00086177	XLOC_039162	unc-10	0.559	0.233	-0.326	0.003824	T10A3.1b.1	=	X:7272305-7299901	-	7	7272932;7273176;7274387;7276345;7278043;7278691;7279790	7272933;7273187;7274389;7276346;7278044;7278692;7279791	1;11;2;1;1;1;1	TCAGCTC;CAGTTGGCTTCCAGTGC;TTCAGTGG;TCAGCAT;TCAGAAA;TCAGGAA;CCAGAAA
TCONS_00028324	XLOC_010725	cht-4	1	0.674	-0.326	0.010003	Y22D7AL.14.1	=	III:1653730-1657967	-	1	1656424	1656425	1	TCAGACT
TCONS_00011728	XLOC_004396	set-13	0.693	0.365	-0.328	0.03147	K12H6.11.1	j	II:2758624-2819187	+	1	2816976	2817065	89	TTTATGGCTAGCTGCCAAAAATCGATTTTTCTTGGCCGGTTGACAACTTTTACCGATTCAAATATATCACCGACTAGCCTAATTTTTTCCAGCAA
TCONS_00050767	XLOC_022160	rdl-1	0.472	0.139	-0.333	0.08202	C46A5.8.1	=	IV:7768228-7770476	-	1	7768990	7768996	6	ATATTTCAGGAG
TCONS_00082089	XLOC_037477	jmjd-3.2	0.912	0.577	-0.335	0.000778	F23D12.5.1	j	X:14447671-14453885	+	1	14448774	14448905	131	TAGGGGTCGCAACATGCGGCATTTCTTTAAATTTCCTCAAAAGCTAGTAGATTCTCCAATTGTCAGCACAAATGATTCTGAACCAATTAATGAACAAGTTTATTCAACACAAAGTAATCATGGCGAGCTTCAAGATA
TCONS_00087756	XLOC_039796	C05C9.3	0.347	0.005	-0.343	0.041331	C05C9.3.1	j	X:11142726-11157643	-	4	11145671;11146064;11146198;11146995	11145673;11146065;11146199;11146996	2;1;1;1	TGCAGTCA;ACAGAGA;CTAGGTT;TTAGACG
TCONS_00082757	XLOC_037809:twk-22	twk-22	0.496	0.151	-0.345	0.002994	T01B4.2a.1	j	X:16299897-16317735	+	2	16308615;16312071	16308908;16312213	293;142	ACAGGATAGCTCAGTCGGTAGTGGTGGTCGCTAGCAATCTGGAGGTCACTAGTTCAAGTCCGCCTAGGTTCACCCAGCCTTTATTGAAAAGTAGAGCAATCCACGACTGGATTATCGGTCACAGTCCCCGGCTAGGACGTGGCTAAAAGTATTGCCCAGTGGGAGCACCACTAGGCGGTGTACCTGACTCCCAGAGCCGCAGTGCATAGCGTTTGAGGAACAGATCGTTCTTTAATCCTTGTTTTATAAGACTGAAACTATTTATATCAATGTTATGATTACACTTGGTTTTTCAGAAA;CAGGGATTGCTAGAAATTAAAATTTGTTACATCTCAGTAATGATTAACGGAGCCTTAAAAATGTCGGGCGATGCTGTTAATTTTCCTAGATTTCTCAAT…
TCONS_00028072	XLOC_010644	R06B10.1	0.352	0.001	-0.351	0.057769	R06B10.1	j	III:963842-972329	-	1	970871	970874	3	TTACAGATG
TCONS_00033825	XLOC_012741:siah-1	siah-1	0.629	0.277	-0.352	0.058263	Y37E11AR.2.1	=	IV:3739521-3751101	+	1	3747166	3747168	2	TTCAGGCG
TCONS_00088643	XLOC_040169	sad-1	0.422	0.066	-0.356	0.045444	F15A2.6b.1	=	X:13487290-13506053	-	3	13489703;13492016;13494479	13489704;13492034;13494480	1;18;1	CCAGGAT;TTAAATGCTCACTTTTTCTAGACA;TCAGGGT
TCONS_00012210	XLOC_004608:sea-2	sea-2	0.459	0.097	-0.363	0.056534	K10G6.3g.1	j	II:3936272-3975039	+	1	3950145	3950173	28	AATTTCACCTTTTTTCAAATTTTTTCACAAGTCT
TCONS_00076695	XLOC_035038	dnj-25	0.69	0.326	-0.364	0.005255	W07A8.3a.2	=	V:20729947-20744406	-	2	20736331;20736510	20736337;20736516	6;6	GAGTTTCAGCAC;AAGTTTCAGATT
TCONS_00063674	XLOC_029050	C25E10.4	0.901	0.53	-0.371	0.07302	C25E10.4.1	=	V:9033550-9036086	+	1	9034056	9034066	10	TAGTTTCATTCAGATA
TCONS_00010381	XLOC_003924	K05C4.3	0.373	0	-0.373	0.01213	K05C4.3.1	j	I:14748005-14754312	-	1	14753142	14753143	1	TCAGGAA
TCONS_00063515	XLOC_028978:cln-3.3	cln-3.3	0.45	0.073	-0.377	0.001594	ZC190.1.1	=	V:8681349-8696679	+	1	8684907	8685012	105	TAGGTTTTTATCTAAATAGCTCCTGGTTTAACATTTTCAAAAGAATTGGCCAAGCAAGTTGTCCAAATCAAAAATCTAGTTAAAACTATTTCACAACTTAATTTTTATAAT
TCONS_00073765	XLOC_033778:T10G3.3	T10G3.3	0.555	0.178	-0.377	0.026377	T10G3.3.1	j	V:13487025-13497499	-	1	13489626	13489628	2	TTCAGATG
TCONS_00063387	XLOC_028917	tmd-2	0.412	0.028	-0.384	0.02594	C08D8.2a.1	=	V:8334678-8340675	+	1	8339010	8340433	1423	AAGATTCCACCTGCCGTCCCAAAATCGTTGGTGTCACCGGAACCGAAACCATCCCTAGCGCCAAAAGCTGCTCCGGTCATTGCAACAGCTCCTCCAAAGTCTACTATTTTAATGAAACAACTATCTTTCCAAAGAGCAAGTCGAGAATCTGAAGAGGATACTGAGTTTGTACCTCCACCTGCAGTACCAGAGCCACCTAAGAAATTGGCTATCCCGAAAACTTTTATGAAGAAGGAAGAGACACCATCTTTTCAAAAAGTTGCAAAGAGGCCTACGCGACAGTGGGAACCAAAGAAACAAGAATCATTGGAACAAGAAGAACATAAGGAAACTGTGAAAGAAGAAGTTAAGAAAGAAGAGGTTAAGGAAAAAGTTCCCGCAAAAGTTGAAAGGAAACAC…
TCONS_00072769	XLOC_033317	dop-5	0.89	0.505	-0.385	5.29e-05	T02E9.3.1	j	V:11362452-11366309	-	2	11362916;11363931	11362917;11363937	1;6	TAAGTTG;CAGTTACAGCAT
TCONS_00029060	XLOC_010954:hum-5	hum-5	0.632	0.232	-0.4	7.02e-09	T02C12.1.1	j	III:4029114-4039661	-	1	4036834	4036840	6	TAGTTCCAGAAT
TCONS_00053019	XLOC_023059	T23F6.3	0.556	0.157	-0.4	0.003504	T23F6.3a.1	=	IV:12723102-12724651	-	1	12723326	12723345	19	TTTGAACACTGTTTATTTCCAGATG
TCONS_00070588	XLOC_032318:dpy-11	dpy-11	0.942	0.537	-0.405	5.84e-06	F46E10.9.2	j	V:6511587-6519409	-	1	6513346	6513348	2	TCCAGAAT
TCONS_00081970	XLOC_037420:F16B12.1	F16B12.1	0.431	0.022	-0.41	0.03697	F16B12.1.1	j	X:14085067-14107905	+	1	14087648	14087656	8	AAGATCTGTAGCGT
TCONS_00047584	XLOC_020410:cha-1	cha-1	0.793	0.381	-0.412	0.002183	ZC416.8b.1	=	IV:3613828-3624697	-	3	3615699;3617241;3617775	3615703;3617243;3617777	4;2;2	GTTTCAGATA;TTCAGACT;TCCAGATG
TCONS_00088393	XLOC_040061	T14G8.4	1	0.587	-0.413	0.041606	T14G8.4.1	j	X:12861236-12870025	-	1	12862825	12862843	18	AAGATGGACGCTATTCTCCAGTTC
TCONS_00030017	XLOC_011298	F47D12.7	0.862	0.437	-0.426	0.046155	F47D12.7.1	=	III:6293246-6296144	-	2	6295101;6295519	6295102;6295520	1;1	GCAGATA;TCAGGTA
TCONS_00031459	XLOC_011863	ZK757.2	0.97	0.543	-0.426	1.02e-05	ZK757.2.1	j	III:9874134-9881044	-	1	9876325	9876326	1	ACAGCTC
TCONS_00084667	XLOC_038531	C02F12.8	0.595	0.166	-0.429	0.001921	C02F12.8.1	j	X:3690142-3713382	-	1	3691676	3691677	1	TCAGAGC
TCONS_00030062	XLOC_011312:atgl-1	atgl-1	0.77	0.338	-0.432	0.010666	C05D11.7a.2	j	III:6406908-6431855	-	1	6424903	6424904	1	TCAGTCA
TCONS_00017262	XLOC_006641:str-179	str-179	0.624	0.174	-0.45	0.071315	F36H5.7	j	II:1746118-1761236	-	2	1747267;1753191	1747269;1753192	2;1	TCCAGGTC;GCAGAAT
TCONS_00005388	XLOC_002109	mig-1	0.509	0.052	-0.457	0.021547	Y34D9B.1a.1	=	I:948278-957404	-	3	949950;950955;951110	949972;950967;951111	22;12;1	GAGCCATTCAAAAAGAATTTTGAAGTTC;CAGGATCTACTTTAGACG;CCAGACT
TCONS_00049884	XLOC_021734	srv-24	0.886	0.412	-0.475	0.073447	Y73B6BL.10.1	=	IV:6288263-6290880	-	1	6290253	6290254	1	TCAGTGC
TCONS_00087692	XLOC_039766:del-5	del-5	0.494	0.007	-0.487	1.46e-06	F59F3.4.2	j	X:11004962-11009070	-	4	11005187;11005697;11006754;11007380	11005188;11005698;11006759;11007381	1;1;5;1	GCAGTAC;GCAGACG;TATTATAGGTC;TTAGACT
TCONS_00068333	XLOC_031284:twk-35	twk-35	0.512	0.024	-0.488	0.079807	F31D4.7.1	j	V:20853095-20865877	+	1	20862969	20862971	2	TATAGCCA
TCONS_00008727	XLOC_003314	sys-1	0.765	0.266	-0.499	0.001017	T23D8.9a.2	=	I:9980063-9984848	-	2	9982846;9984424	9982857;9984428	11;4	AAGTTCAATTTCAGCTA;TTTTCAGATT
TCONS_00020996	XLOC_008110:clec-60	clec-60	0.513	0.004	-0.51	0.001694	ZK666.6.1	=	II:10479919-10482228	-	1	10481633	10481639	6	TTATTTCAGCGT
TCONS_00072899	XLOC_033391:ceh-27	ceh-27	0.525	0.01	-0.515	0.031601	F46F3.1a.1	=	V:11656139-11665689	-	1	11664235	11664256	21	TAGCAAACCTGAATATTTCTTCAGCTA
TCONS_00073707	XLOC_033757:nhr-129	nhr-129	0.734	0.212	-0.522	0.037642	C50B6.14.1	j	V:13329192-13333917	-	1	13333393	13333400	7	GTTTTTGCAGGTA
TCONS_00077807	XLOC_035522	ZK816.1	0.698	0.173	-0.525	0.0019	ZK816.1.1	j	X:3351734-3362493	+	1	3359062	3359075	13	AACGAACGTGTTTCAGATA
TCONS_00004328	XLOC_001717:F33E2.4	F33E2.4	0.531	0.001	-0.53	0.003514	F33E2.4.1	=	I:12577763-12587055	+	1	12584473	12584474	1	CAGAACG
TCONS_00060432	XLOC_027575	npr-26	0.648	0.109	-0.539	0.076076	T02D1.6c.1	=	IV:17408230-17417805	-	1	17410172	17410463	291	TATGTTTTACAATATGCAAACCAGGGGAACTTTTTTCAATTAAATTTCCACCCTACCCATGCTATTGTATCATGTTCGTGCATTTGTTTATGTCGTCTGGAAAACTCTCATTATGAGAAAACATTGGAGCAGGAAGTTGAGACGGAAGGAACAGGGAGACGGGAGTAGAAATCTGTTGTTTTTTTTTTATTATTTAGGTTACTGGTATAGCTATAACCTATAGGTTAGAGGTGACAAAAGAATTTTAAAATTTAAAAAAATACTTCATACTTTAAAAAAATGTAATATTTTCAGGAA
TCONS_00029813	XLOC_011233	pxl-1	0.63	0.086	-0.544	2.14e-07	C28H8.6a.1	j	III:5889720-5901669	-	1	5894130	5894292	162	AGAGAAAAGGAGCAGCACACCTTTTTCTTTTCCACGCACACAACACTTTTACCTATCACTTGGCGGAATGATGCGCGAGTTGCAACAACGGCTTGACCATTTCAATGGTCCAAATTATGCACAAAATAGTCATTCAAACCACCAACAACATCATTCGGTTTATAGCTC
TCONS_00000075	XLOC_000021:duox-2	duox-2	0.974	0.428	-0.546	0.000118	F53G12.3.1	j	I:137534-146468	+	1	138017	138066	49	TAGTTACCCCTAGAAATCAAAGTTCAGTTCAGCAAAGAGACTTTATTTTCAGCAC
TCONS_00077766	XLOC_035509:F11D5.7	F11D5.7	0.66	0.108	-0.551	2.68e-08	F11D5.7.1	j	X:3282601-3307095	+	1	3300082	3300083	1	TTAGATG
TCONS_00046922	XLOC_020181	clp-6	0.653	0.094	-0.559	0.00963	Y77E11A.10.1	j	IV:1430508-1435205	-	2	1431856;1432533	1431857;1432541	1;8	TCAGGTA;AAGTTTTTCAGGAA
TCONS_00079398	XLOC_036280:C10A4.4	C10A4.4	0.607	0.02	-0.587	0.048258	C10A4.4.1	j	X:7393139-7403611	+	1	7402131	7402133	2	TACAGATG
TCONS_00083533	XLOC_038073	rund-1	0.649	0.046	-0.603	0.097913	T19D7.4.1	=	X:656187-661962	-	1	661104	661106	2	TCCAGAAG
TCONS_00081428	XLOC_037165	adt-1	0.794	0.168	-0.627	3.31e-07	C02B4.1.1	j	X:12670678-12691459	+	1	12681498	12681507	9	CAGCTATTCCAGCCC
TCONS_00076088	XLOC_034834	F21D9.2	0.669	0.041	-0.628	0.000435	F21D9.2.1	=	V:19258233-19262522	-	1	19259353	19259354	1	TCAGAAT
TCONS_00027780	XLOC_010573:F40G9.9	F40G9.9	0.686	0.057	-0.629	4.54e-06	F40G9.9.1	=	III:170219-184915	-	1	171521	171525	4	TTTTCAGAAA
TCONS_00061043	XLOC_027830	C38C3.3	0.695	0.062	-0.633	0.004192	C38C3.3b.1	=	V:1495633-1498199	+	2	1495806;1497106	1495807;1497112	1;6	TCAGAAA;AAGTTTCAGTCA
TCONS_00047082	XLOC_020239	M70.3	0.643	0.003	-0.64	0.017138	M70.3a.1	=	IV:2237130-2243041	-	2	2240731;2241424	2240733;2241428	2;4	TTCAGATT;TTTTCAGCTT
TCONS_00074444	XLOC_034035	C30G7.3	0.803	0.157	-0.647	0.023076	C30G7.3.1	=	V:14941909-14945704	-	3	14943547;14943928;14944181	14943548;14943930;14944182	1;2;1	TCAGTAC;TTCAGCAA;GCAGACG
TCONS_00046870	XLOC_020162	F38A1.15	0.68	0.028	-0.652	0.003459	F38A1.15.1	=	IV:1145680-1328241	-	1	1241982	1241985	3	TTTCAGACA
TCONS_00046018	XLOC_019765:nep-24	nep-24	0.897	0.239	-0.658	0.096658	Y116A8C.5.1	=	IV:16920340-16927180	+	1	16925639	16925841	202	AGGCGAGAGGTCGGCGGGAGGCGGGCCGGCGTCAGGCCCCCGTCCTCCGCCTGCCTCGCGCGCAGAACCCGAGAGCCACTTTTCACACTTTATTGTGTCTTTCCTATCTCGCTAAAATAAGGTGAGAGGCAGGCGTCAGACCCTGAAACCGCGCCTGCCTCCAAAGCACTATATTTCGACTCTCCGGAAGATATTCTCCTTATAGCTT
TCONS_00088208	XLOC_039981	otpl-8	0.797	0.13	-0.667	0.083937	H19J13.1.1	=	X:12266783-12270944	-	2	12267869;12268441	12267898;12268444	29;3	AAAACTATTAGTACTAATCCATTATATTTTAGAAT;TTCAAGGTA
TCONS_00020400	XLOC_007870	F37B12.1	0.953	0.276	-0.677	2.76e-07	F37B12.1.1	j	II:9026967-9030193	-	1	9029261	9029263	2	TTCAGGAC
TCONS_00076191	XLOC_034861:Y43F8B.14	Y43F8B.14	0.985	0.253	-0.732	0.000438	Y43F8B.14.1	j	V:19451855-19472502	-	1	19453009	19453088	79	CAGCGAATGATTATGAAAAACACATAACTAATGCAGAAAAAGAATTAGAAGAAAACCCGCCCAACATCCGCAAATTTTGCAGCAA
TCONS_00073829	XLOC_033795:F53F4.8	F53F4.8	0.953	0.17	-0.782	0.028206	F53F4.8	=	V:13612438-13620288	-	1	13615689	13615771	82	CAGGCATATGTTTTTCAAATTTCTCTTTCTATTTCAAATGGCATAGGTTTCATTTGGAAGGCAAAAAAAAATAAATGTGCTTCAGAAC
TCONS_00019264	XLOC_007450	C56C10.6	0.99	0.187	-0.803	0.025131	C56C10.6.1	=	II:6579358-6581358	-	1	6580466	6580480	14	TAGCTAAATTATTTCAGAGG

## Sheet: daf-2_d11_vs_daf-2_d1
Supplemental Table S3. A3 isoforms that were differentially regulated in wild-type and daf-2 mutant animals in old age compared with those at day 1 of adulthood
A3 isoforms differentially regulated in daf-2 mutant animals at day 11 of adulthood compared with day 1 of adulthood
Isoform_ID: Detected isoform, Gene_ID and Gene_name: A gene contains the isoform, Young: Isoform fraction in young samples, Old: Isoform fraction in old samples, Difference: Old - Young, q_value: Significance of the difference
Nearest_reference_ID: A reference isoform which is the most similar to the detected isoform, Class_code: The type of match between the detected isoform and the reference isoform, A3: The number of A3 in the isoform
Class_code, =: Complete match, j: Potentially novel isoform, o: Generic exonic overlap with a reference, x: Exonic overlap with a reference on the opposite strand, s: Intronic overlaps with a reference intron on the opposite strand
Isoform_ID	Gene_ID	Gene_name	Young	Old	Difference	q_value	Nearest_reference_ID	Class_code	Locus	Strand	A3	A3_genomic_start	A3_genomic_end	Distance_between_adjacent_3′_splice_sites_of_A3	Sequence_between_adjacent_3′_splice_sites_of_A3
TCONS_00071709	XLOC_032854:lron-2	lron-2	0.001	0.954	0.953	8.77e-07	ZK682.5.2	=	V:9284128-9288024	-	1	9285745	9285746	1	ACAGTTA
TCONS_00050924	XLOC_022233	B0218.5	0.1	0.98	0.881	0.003009	B0218.5.1	j	IV:8155196-8157923	-	1	8156575	8156587	12	CAACGTGAACTTTAGATT
TCONS_00007507	XLOC_002878	M05B5.1	0.175	0.998	0.823	0.035131	M05B5.1.1	j	I:7176962-7188298	-	1	7179419	7179430	11	AACATGACTTTCAGCAA
TCONS_00020022	XLOC_007733	twk-3	0.095	0.902	0.808	0.096738	M110.2.1	=	II:8204331-8212784	-	1	8211128	8211149	21	AAGGTGAATAAAACAAAGTTTCAGCCT
TCONS_00051621	XLOC_022510	dct-15	0.148	0.923	0.775	0.005447	W08D2.3a.1	=	IV:9806312-9810733	-	1	9808046	9808047	1	TAAGTTT
TCONS_00039298	XLOC_015424	bus-12	0.185	0.953	0.768	0.004222	JC8.12a.1	j	IV:13256050-13259076	+	1	13256837	13256845	8	CAGCATGATAGTCT
TCONS_00082044	XLOC_037455:prx-1	prx-1	0.111	0.843	0.732	1.14e-11	C11H1.4a.1	=	X:14313720-14330195	+	1	14321799	14321801	2	TTCAGGAA
TCONS_00075516	XLOC_034590:F59A1.13	F59A1.13	0.217	0.914	0.697	0.083583	F59A1.13.1	j	V:17686199-17690997	-	1	17687965	17687966	1	TCAGAGA
TCONS_00022438	XLOC_008684	gcy-29	0.001	0.694	0.693	0.005854	C04H5.3.1	j	II:14540894-14552476	-	4	14543380;14544578;14547908;14548236	14543381;14544581;14547923;14548237	1;3;15;1	TCAGCTA;ATTTAGGTT;AAGGCCGCGTAATTCCAGAAT;TCAGTTG
TCONS_00015973	XLOC_006160	Y48E1B.8	0.185	0.869	0.684	2.8e-13	Y48E1B.8.1	j	II:13585012-13589033	+	1	13587169	13587174	5	CAGAAACCCTT
TCONS_00012047	XLOC_004547:wago-11	wago-11	0.295	0.973	0.679	7.02e-07	Y49F6A.1.1	j	II:3598249-3615482	+	1	3605116	3605124	8	AAGAATTTCAGAGT
TCONS_00069048	XLOC_031579:nhr-275	nhr-275	0.152	0.829	0.676	0.085893	Y5H2A.2.1	j	V:2262029-2267260	-	1	2266012	2266016	4	TTTCCAGATT
TCONS_00015000	XLOC_005751	cutl-9	0.031	0.681	0.65	0.001909	M28.1.1	=	II:10621267-10625943	+	1	10624851	10624861	10	TAGCTATTTTCAGCAT
TCONS_00020995	XLOC_008110:clec-60	clec-60	0.353	0.996	0.643	2.51e-08	ZK666.6.1	j	II:10479919-10482228	-	1	10481633	10481639	6	TTATTTCAGCGT
TCONS_00069602	XLOC_031864:ugt-32	ugt-32	0.033	0.631	0.597	0.05749	F47C10.6.1	j	V:3841826-3848463	-	2	3843725;3843970	3843726;3844007	1;37	TTAGCAA;ACAATGGCTTTGCTTTTCAAATTAATGATTTTATATTCAGTAT
TCONS_00019135	XLOC_007389:C29F5.3	C29F5.3	0	0.586	0.586	0.018569	C29F5.3.1	=	II:6290607-6294611	-	1	6292458	6292466	8	AAGTATTTTAGAAA
TCONS_00072016	XLOC_032970:K08H10.6	K08H10.6	0.04	0.62	0.58	0.000363	K08H10.6.1	j	V:9992911-9995890	-	1	9995402	9995433	31	CAGTCGTTATTCATATGAACTCTCATCATCTCAGCTT
TCONS_00051160	XLOC_022321	F20C5.5	0.247	0.817	0.571	9.31e-06	F20C5.5.2	=	IV:8767687-8770122	-	1	8769935	8769937	2	TTCAGAAT
TCONS_00016676	XLOC_006424	ptr-3	0.026	0.594	0.567	9.08e-11	C41D7.2.2	=	II:362494-370928	-	2	365170;366552	365174;366553	4;1	TTTTCAGCCA;ATAGCTA
TCONS_00024948	XLOC_009577:wht-6	wht-6	0.112	0.666	0.554	0.035534	T26A5.1.1	j	III:6464955-6481240	+	1	6470116	6470125	9	AAGTGTTTTCAGATG
TCONS_00017951	XLOC_006879:sdz-35	sdz-35	0.187	0.723	0.536	0.003985	ZC239.12.1	=	II:3205678-3211381	-	1	3208218	3208219	1	TCAGCCG
TCONS_00086133	XLOC_039155:F46H5.3	F46H5.3	0.001	0.536	0.534	7.25e-65	F46H5.3a.2	=	X:7230329-7242983	-	2	7230488;7232484	7230489;7232571	1;87	GCAAAAA;TCGCTTCGACTCGCACTCTCCACAATTCCACAACTCTCTCGCCCCATCGTCTCTGAGTCTGTTCACGAAAAAACATCCATCGTTATTTAGGGG
TCONS_00072636	XLOC_033254	C06H2.7	0.092	0.61	0.518	5.23e-06	C06H2.7b.1	=	V:11140706-11144758	-	1	11144433	11144435	2	TTTAGACG
TCONS_00071908	XLOC_032931:smg-4	smg-4	0.338	0.853	0.515	0.02702	F46B6.3a.1	=	V:9774893-9783062	-	1	9776317	9776324	7	AAGCTTTCAGTCA
TCONS_00018516	XLOC_007111:C33F10.8	C33F10.8	0.073	0.586	0.513	0.000177	C33F10.8.1	=	II:4823331-4832469	-	1	4824429	4824430	1	TCAGAAA
TCONS_00083534	XLOC_038073	rund-1	0.313	0.823	0.51	0.032204	T19D7.4.1	j	X:656187-661962	-	1	661104	661106	2	TCCAGAAG
TCONS_00079704	XLOC_036439	C17H11.1	0	0.506	0.506	0.025208	C17H11.1.1	j	X:8173562-8180885	+	1	8178971	8178972	1	ACAGGTA
TCONS_00052281	XLOC_022764:mboa-4	mboa-4	0.137	0.643	0.506	0.000273	C08F8.4b.1	=	IV:11156704-11166171	-	1	11158080	11158081	1	TCAGTTC
TCONS_00070006	XLOC_032048	ncx-9	0	0.504	0.504	0.008703	C13D9.8.1	j	V:4943115-5053490	-	1	4995162	4995214	52	TACATGGGGAAACTGAAATGGTTTTCGTGGATTCTTATATTTTGTTTTTTGATAGAAG
TCONS_00005727	XLOC_002224:inx-19	inx-19	0.213	0.717	0.503	0.079247	T16H5.1a.1	=	I:2449304-2464637	-	1	2456463	2456470	7	CATATTCCAGCCT
TCONS_00012496	XLOC_004690	pqn-35	0.256	0.756	0.5	0.036051	F35D11.2b.1	j	II:4612988-4626107	+	1	4623825	4623828	3	CAGGTTCAC
TCONS_00083713	XLOC_038132	R193.2	0.001	0.495	0.494	4.42e-16	R193.2.1	j	X:1132992-1150313	-	10	1133802;1133937;1135269;1135663;1135863;1141305;1146322;1146945;1147521;1148408	1133803;1133938;1135271;1135664;1135865;1141311;1146324;1146946;1147528;1148410	1;1;2;1;2;6;2;1;7;2	GCAGAAT;TCAGAGG;TGCAGACC;TCAGTCT;TTCAGGCT;GTTTTACAGAAC;TTCAGTGC;TCAGTGT;AAGTTTTCAGCCA;TACAGACT
TCONS_00047261	XLOC_020303	Y54G2A.13	0.105	0.598	0.494	0.029942	Y54G2A.13.1	=	IV:2814542-2823519	-	2	2815510;2818057	2815511;2818058	1;1	TCAGATG;CCAGATC
TCONS_00029836	XLOC_011237	dnc-2	0.119	0.604	0.485	0.04276	C28H8.12.1	=	III:5923186-5925756	-	1	5924989	5924990	1	TGAGATG
TCONS_00077940	XLOC_035573	aex-4	0.126	0.607	0.482	4.1e-06	T14G12.2.1	j	X:3729280-3733457	+	1	3730629	3730658	29	CAGAAAAATGACGAGCCCAAAATTGCGACGTAAAG
TCONS_00083387	XLOC_038031	C04E7.3	0	0.482	0.482	8.72e-17	C04E7.3.1	j	X:334800-349539	-	1	337532	337681	149	AAGGGAGATACTGTGAACAATCTCAATACTTGTATGCTCCAGCCGCACCCGTCCCCTACCGCAAAAAGGCATGAAAATCCGAGGTCACCGGTTTTTAAAGTTCCAAGAAAATTTGTTTCAAAACGCGAAAATATTCAAGCACTAATATTGAGAAA
TCONS_00073931	XLOC_033823:swan-1	swan-1	0.08	0.561	0.481	0.061576	F53C11.8.2	=	V:13796640-13807448	-	1	13805881	13805882	1	CCAGGAG
TCONS_00025118	XLOC_009635	K04C2.7	0.042	0.514	0.472	0.00846	K04C2.7.1	j	III:6875913-6883910	+	1	6882240	6882242	2	TTCAGTGA
TCONS_00008851	XLOC_003365:mgl-2	mgl-2	0.118	0.585	0.468	0.055315	F45H11.4a.1	j	I:10382745-10391501	-	3	10385518;10389550;10390857	10385519;10389551;10390858	1;1;1	CTAGGAC;TCAGGCA;TTAGATC
TCONS_00002704	XLOC_000985	H05L14.3	0.048	0.51	0.462	0.013056	H05L14.3.1	j	I:7977812-7984713	+	1	7980227	7980228	1	CAGAAAC
TCONS_00063091	XLOC_028782:C54F6.20	C54F6.20	0.034	0.489	0.455	0.043496	C54F6.20.1	j	V:7524580-7528006	+	1	7524889	7525010	121	TCTGTTCATTACAAAACTGTATTTGAACGGTTGTCATAAGGGCGCCCAATTATTTCAAACTTTTTCTGCGATTATTCCTCTACTAACAAAAAATTTTGACAAATATCAATCAAATAACTTTCAGAAT
TCONS_00070084	XLOC_032084	Y47A7.2	0.003	0.454	0.451	3.2e-07	Y47A7.2.1	j	V:5163268-5213468	-	1	5197588	5197589	1	TCAGACC
TCONS_00070395	XLOC_032240	Y38A10A.2	0.423	0.873	0.449	0.008843	Y38A10A.2.1	=	V:6057144-6064119	-	1	6058721	6058722	1	TCAGCTC
TCONS_00061061	XLOC_027840:cdc-25.2	cdc-25.2	0.205	0.652	0.448	1.36e-07	F16B4.8d	j	V:1567072-1586080	+	1	1582419	1582771	352	ATCAATTTTTTCAACAGCTATAAATTTTAAAACCAAGTTTAACGAACTGTTTTCACCAAAAATTTTTCCTAGAAGGTGTATTTATCTTTCTAATATCAGTCATTCTGCTATCAAATCACCGAAATTTCTGATTTCTGACATTTTCTGCCATTTCCCGTGTTTCGAGACAAAAAACGACCTGAGTAGACCCAAATCTCACCAAGATAGACGTGTCTATTTCTAAATTTTGACCCTCTCTCCCCAGGTGAAAAGTTTCTTTTGGGATGTATTGGGTGGGACCTGAACCGCCTATTCTCAGACCACCAGGCCATCCGTCGTTGCCATTCGTACTCCTTGTGCATTCCAACATTTGCAGAAA
TCONS_00084483	XLOC_038438:klp-4	klp-4	0.137	0.584	0.447	0.029759	F56E3.3b.1	j	X:3171423-3190477	-	1	3177264	3177299	35	CAGGTATATGTATTTATTAATCAAAAGCTTGATTTCAGATC
TCONS_00009846	XLOC_003775:M01E5.2	M01E5.2	0.181	0.622	0.442	4.02e-05	M01E5.2.2	j	I:13276955-13286989	-	3	13278501;13278875;13282401	13278502;13278877;13282407	1;2;6	TCAGCTA;TTTAGATG;AAGTTTCAGATC
TCONS_00061666	XLOC_028116	T20D4.12	0.366	0.801	0.435	0.057799	T20D4.12.1	j	V:3396185-3397903	+	1	3397065	3397072	7	TTTGTTTCAGAAA
TCONS_00014011	XLOC_005339:ufd-2	ufd-2	0.256	0.687	0.431	3.6e-05	T05H10.5a.1	=	II:8062740-8073372	+	1	8062851	8062863	12	TAGTTCTTTTTTCAGGCA
TCONS_00064530	XLOC_029453	cdkl-1	0.017	0.448	0.431	0.053897	Y42A5A.4b.1	j	V:11098927-11107488	+	1	11105472	11105474	2	TTCAGCTC
TCONS_00024968	XLOC_009581:F23F12.13	F23F12.13	0.547	0.977	0.43	0.00051	F23F12.13.1	j	III:6495676-6500102	+	1	6495816	6495817	1	TCAGATT
TCONS_00015300	XLOC_005888	B0334.9	0.085	0.504	0.419	8.93e-05	B0334.9	j	II:11479785-11482485	+	1	11481194	11481214	20	CAGATAAGAAATGTGGTTTATAGGTG
TCONS_00026925	XLOC_010306	spe-6	0.024	0.442	0.418	0.000655	Y66D12A.20.1	j	III:11505487-11508949	+	1	11508207	11508209	2	CAGAGACA
TCONS_00072116	XLOC_033006:ZK856.5	ZK856.5	0.051	0.467	0.416	9.24e-05	ZK856.5.2	j	V:10184688-10190852	-	1	10190131	10190157	26	GTTATCATTTATAATCGAATCATTTGCAGGTT
TCONS_00029967	XLOC_011282	esyt-2	0.022	0.436	0.414	8.72e-17	T12A2.15a.1	j	III:6217370-6230970	-	2	6225844;6229402	6226108;6229403	264;1	AGAGATTTTATTCAAAATTGCAGTATTTTTGATTACCCAGAACGAAAAATCTGAGCAGTACGGTGCATTTTGTAGGTCGTTGTTACCTGCCTACAAGTCTTACTATAGATATATCTGCATTATATTATAGTATGCGATTCTCATTATCCAATTTCGATTAATTGTTTTGAAGTTCAACTGCGAACACTTTGGCTATAGGTAGTTATAAAAACCTAATATTCTGATGCAACATGTTATATGCGCAAACTATGAATGAACTAGTTTCAGCAT;TCAGAAG
TCONS_00018222	XLOC_006988:T24E12.10	T24E12.10	0.029	0.443	0.414	7.64e-05	T24E12.10.1	j	II:3760161-3777606	-	5	3767114;3767215;3767524;3768611;3769050	3767115;3767216;3767533;3768612;3769059	1;1;9;1;9	TCAGTTG;TCAGGTC;TCAATTTTTCAGCCC;TCAGCCG;AAGTAAATTCAGATG
TCONS_00000439	XLOC_000140:Y92H12A.2	Y92H12A.2	0.579	0.984	0.405	0.095703	Y92H12A.2a.1	j	I:1514754-1557542	+	1	1544761	1544767	6	CAGAAGCATCGG
TCONS_00007810	XLOC_002999	K04G2.7	0.045	0.436	0.391	0.092188	K04G2.7a.1	=	I:8044666-8049907	-	2	8047947;8048248	8047948;8048250	1;2	GTAGAAC;TTAAGGAG
TCONS_00009104	XLOC_003468	dxbp-1	0.287	0.675	0.388	0.017082	Y52B11A.9.2	j	I:11032338-11038898	-	1	11038827	11038857	30	AGCTTTTTCACCTAAAATTCCTAATTTTTTCAGATT
TCONS_00052069	XLOC_022682:R102.4	R102.4	0.471	0.858	0.387	0.000136	R102.4a.2	j	IV:10691990-10697491	-	1	10695574	10695581	7	CAGCTTGCAGGAC
TCONS_00028077	XLOC_010644	R06B10.1	0	0.381	0.381	0.000504	R06B10.1	j	III:963842-972329	-	2	966874;970871	966876;970874	2;3	TGCAGAAA;TTACAGATG
TCONS_00082699	XLOC_037775	C30F2.5	0.176	0.555	0.379	0.019873	C30F2.5.1	j	X:16088088-16096974	+	1	16094668	16094676	8	CAGTTTTTCAGATG
TCONS_00073272	XLOC_033563	twk-14	0	0.373	0.373	0.006305	K01D12.4b.1	j	V:12387037-12395706	-	2	12388108;12390594	12388109;12390630	1;36	CCAGCTC;TAGATGGCTATTACTCAAACTGTCATGCACAAGTTACAGTTT
TCONS_00050435	XLOC_022025	deb-1	0.152	0.522	0.37	0.010898	ZC477.9c.1	=	IV:7085215-7094370	-	1	7092524	7092526	2	TTTAGGTC
TCONS_00051813	XLOC_022592:gst-3	gst-3	0.418	0.786	0.368	0.001369	K08F4.11.1	=	IV:10139379-10142032	-	1	10139720	10139721	1	TCAGAAA
TCONS_00012102	XLOC_004560:F19B10.1	F19B10.1	0.131	0.497	0.366	0.001343	F19B10.1.2	j	II:3667178-3685848	+	1	3683177	3683181	4	TTTTCAGATC
TCONS_00073322	XLOC_033582	pals-38	0.106	0.471	0.365	0.029667	C54D10.8a.1	=	V:12445160-12463230	-	2	12445998;12446224	12446000;12446226	2;2	TTCAGATC;TTTAGATG
TCONS_00012409	XLOC_004656	lat-2	0.065	0.426	0.361	0.049672	B0286.2b.1	=	II:4359081-4368332	+	1	4366178	4366179	1	CAGTTTT
TCONS_00005149	XLOC_002043	ptr-11	0.002	0.363	0.361	0.030034	F56C11.2a.2	=	I:160171-177586	-	2	163608;166104	163609;166106	1;2	TCAGACC;TTCAGTGA
TCONS_00009379	XLOC_003585:vab-10	vab-10	0.033	0.392	0.36	0.003679	ZK1151.1k.1	=	I:11707817-11923919	-	1	11759683	11759684	1	TCAGGTT
TCONS_00062489	XLOC_028509	M03F8.3	0.189	0.541	0.353	0.001194	M03F8.3a.1	=	V:5940022-5943362	+	1	5941586	5941595	9	TAGTACTTTCAGGAA
TCONS_00086858	XLOC_039435	F53A9.7	0.115	0.466	0.351	0.006626	F53A9.7.1	o	X:8716531-8717184	-	1	8716927	8716929	2	TTCAGAAA
TCONS_00065740	XLOC_030025	F09F3.8	0.001	0.351	0.35	0.044301	F09F3.8	j	V:13869763-13872619	+	1	13870541	13870552	11	CAGGAAGATCACAGATA
TCONS_00089869	XLOC_040708	F41G4.7	0.024	0.37	0.346	0.049124	F41G4.7.1	=	X:16816259-16842977	-	1	16834425	16834511	86	CAGAGCTCTTACAAGCCATCAAGCCACTCTTCGACCAAGTCAAAAAGGAAATGGCCGATCAGCTGGCTGACCAACTTGGAAGATTCCAGGAG
TCONS_00050639	XLOC_022111	F13B6.3	0.454	0.797	0.343	0.009252	F13B6.3.1	j	IV:7461965-7466218	-	4	7462284;7462649;7465431;7465966	7462289;7462651;7465432;7465972	5;2;1;6	TTTTTCAGACC;TTTAGTTA;TTAGATA;ATATTTTAGCTT
TCONS_00020301	XLOC_007831	T07D4.2	0.164	0.507	0.343	0.082913	T07D4.2b.1	=	II:8869548-8876639	-	2	8871270;8873833	8871271;8873835	1;2	TCAGGTA;TTCAGAAG
TCONS_00085134	XLOC_038721	tsp-14	0.28	0.621	0.341	0.02638	F39C12.3a.1	=	X:4866074-4876853	-	2	4868228;4869012	4868229;4869025	1;13	TCAGGCT;AAGTAAATATCTTTAGCTG
TCONS_00053148	XLOC_023104	dli-1	0.345	0.684	0.339	0.001798	C39E9.14b.2	=	IV:13093941-13098836	-	1	13097823	13097829	6	AAGTTTTAGGAA
TCONS_00077355	XLOC_035309:Y102A11A.9	Y102A11A.9	0.019	0.356	0.337	0.000123	Y102A11A.9a.1	=	X:2012936-2025737	+	1	2015555	2015556	1	TCAGAAG
TCONS_00018859	XLOC_007262	eif-3.L	0.514	0.849	0.335	1.45e-06	C17G10.9c.1	=	II:5543580-5657371	-	1	5621078	5621087	9	CAGTCGTTCCAGGAA
TCONS_00069325	XLOC_031747:srab-11	srab-11	0.332	0.659	0.327	0.059324	C36C5.8.1	j	V:3143093-3150173	-	2	3147053;3149173	3147056;3149263	3;90	TTACAGGTT;TAGACACACGATCATCTTTCCGGTGTACAGTAGTGGCAATAGTTGCCCAAGCACTATAGAACACCTTTCTAACCGTCCATTTCCAAATTTCAGGTT
TCONS_00072703	XLOC_033287	cln-3.1	0.077	0.404	0.326	0.012383	F07B10.1a.1	j	V:11263277-11265912	-	1	11264912	11264913	1	TCAGAGA
TCONS_00025978	XLOC_009966	cls-2	0.183	0.507	0.324	0.006398	R107.6a.2	=	III:9055051-9058882	+	1	9058264	9058273	9	CAGTATTTGCAGGAG
TCONS_00087437	XLOC_039676:rme-4	rme-4	0.483	0.807	0.324	0.067849	F46F6.1a.2	=	X:10373234-10406303	-	1	10374737	10374743	6	TAGTTCCAGAAA
TCONS_00051795	XLOC_022585:egl-38	egl-38	0.193	0.515	0.323	0.089376	C04G2.7.1	j	IV:10106805-10112738	-	1	10107684	10107693	9	TAGTATTTTCAGTCA
TCONS_00018472	XLOC_007092	F41C3.11	0.301	0.624	0.323	0.045647	F41C3.11.1	j	II:4727325-4736857	-	1	4733947	4733949	2	TACAGACT
TCONS_00060701	XLOC_027681:nhr-98	nhr-98	0.032	0.346	0.315	0.000158	M02H5.6b	=	V:450965-458275	+	1	456006	456050	44	AGCTATTTCACCACCGAAAAATAAAAATTTATAATTTGACGTTTCAGCTT
TCONS_00081429	XLOC_037169	ugt-50	0.085	0.4	0.315	5.72e-09	T07C5.1b.1	=	X:12691572-12702063	+	1	12691916	12692182	266	AATACACGTCTTCTTCTTTTTCACCCTTTTCTTAGTCCCACAATTTTCTTTTCACCCTCAGCTTTACATTCTCCGCAATCCGATTCGGCAGATGGCTTGAAAAGCCACGCCCATCATTATGAGAAGGGGGAGGAGCCAACTCGTTCCATGTAGACGGACCCCCAATTCAGCTCAGTCTTGTTCCACATACACCCCACTGGTCGGTTGCCCTCTCCTCCTCCTTCTCTCCCTCCACTGCCGCCTGTCAACCAGTCATCTAGCAATTGTAGGTG
TCONS_00077800	XLOC_035518:F11D5.1	F11D5.1	0.061	0.375	0.314	1.39e-06	F11D5.1a.1	=	X:3332418-3347302	+	1	3334112	3334114	2	TTCAGCAG
TCONS_00031766	XLOC_011989	K01G5.8	0.308	0.622	0.314	0.028898	K01G5.8a.1	=	III:10740279-10740772	-	1	10740597	10740606	9	CAGAGATTCCAGAAA
TCONS_00065750	XLOC_030029:srsx-19	srsx-19	0.688	1	0.312	0.005418	T22G5.4.1	j	V:13880699-13890295	+	1	13887834	13887835	1	TCAGCAA
TCONS_00033537	XLOC_012620:Y54G2A.45	Y54G2A.45	0.014	0.323	0.31	5.07e-05	Y54G2A.45a.1	j	IV:2805339-2812848	+	1	2807848	2807855	7	AAGTTTACAGTTT
TCONS_00000169	XLOC_000056	icd-2	0.513	0.822	0.309	0.004414	Y65B4BR.5a.1	=	I:535790-536670	+	1	536350	536356	6	CGGTTTAAGGAG
TCONS_00012417	XLOC_004660:ZK430.5	ZK430.5	0.016	0.323	0.307	5.67e-10	ZK430.5.1	j	II:4405454-4419131	+	2	4405864;4415659	4405908;4415966	44;307	GTAATGCATTTCCTCAGCACACCGGACAAGAACAGCAATTGTTTCAGCAA;TAGGTCAAATTGAAGGAAATTTATTCAGCGATCAGTATTCGATCGAAGAATGTACGTATGACGTGGCAGTCGCGCGAAAAGCTCATGTAAAAGAGCGCTTCATGTGTTACCATACTTTTGGCCCACCCTGTAACTGATAAAGAAATTGATTGCTACTTTATGGAATTGATTGATGATTGCTTTGTGAAAACCAAGTCAATTTCTGGAAACAATCAAATTCGGCACTTATCAGAAGCGATGAAGACGGCGAGGGAAAAGGTCGTCCTGAATTATTTGACCGCGGCTTCCGTCGTGATATATGGATTTCCAGTTG
TCONS_00017048	XLOC_006553	Y57G7A.8	0.001	0.307	0.306	0.05525	Y57G7A.8	j	II:1288734-1293257	-	3	1291406;1291848;1292383	1291407;1291849;1292401	1;1;18	TCAGATG;TCAGAAC;CAGATAAATCGAACCACGCAGGCG
TCONS_00071577	XLOC_032789:nhr-195	nhr-195	0.01	0.312	0.302	0.030997	F59E11.10b.1	j	V:8968709-8972714	-	1	8972108	8972110	2	TTCAGGTG
TCONS_00002532	XLOC_000924	D2030.2	0.092	0.393	0.301	0.033125	D2030.2a.3	=	I:7422586-7723116	+	1	7576363	7576575	212	TTTTGATAGGTGAAAGCTTAGAAATTGCTAAATTTTTGGCTGTAATTAAGTTTTTTTGTTGAAAAGTTGCATTATTTTCAGCCATTTTAGTGCCATAGAATTCCTTAAATATTTTCTACACTAGCGATGCTCCCCAATGTGTATTTAAAAATTTCTTTATGTCTAGACTTTAGTGTAATTTGACCTACTTTACTGCTAACTCTCCTTGTTTTCAGCTT
TCONS_00080343	XLOC_036690	F15G9.1	0.183	0.484	0.301	1.41e-06	F15G9.1a.1	j	X:9702239-9708563	+	1	9707328	9707362	34	GAATATACTCTTATTTAATAGCATATTTTTCATTCAGAAG
TCONS_00009648	XLOC_003704:T07D10.8	T07D10.8	0.019	0.317	0.298	0.003427	T07D10.8	j	I:12591115-12599120	-	1	12598916	12598998	82	CTTCGATTTTTCATAGTTTTCTTCAGCAATTCTTTGATCTTTTTGGCAAAAATAATTATTTTCCGTAAATATACTCGTGTTTCAGCAT
TCONS_00030712	XLOC_011555	D2007.2	0	0.296	0.296	0.016585	D2007.2b.1	x	III:8147830-8154631	+	1	8150828	8151178	350	CAACCTGAATATAATAAAAAGCATGAAAATATCTTCTAAACTTTCTATAAACTTCATGCCACCCCCACATTGGTTGACCCAACAATCCCGTCCACACACATCTACACATACATACACAACAATCTTCTATCCTTTGTGGTCGTGCCCTAGTCACCGCCGTCATTTTTCGAGCCGCTGAGCAATTATATTATGTCTATTATGAATGTACTGCTGCTCTTCTCTCGCTTTTTTCTACTCATTCGGACCTTTCTCTCTCTCTCAACTAGAAATGATGATGATGTTCGATGAGCACAAAACTTTCTTTTTTGGGCTCTTTTTGGAGCACTTTCGGTGACTCTCACAAAGGTGTAAACACT
TCONS_00022297	XLOC_008629	K09E4.4	0.069	0.365	0.296	0.000206	K09E4.4.1	=	II:14114185-14123029	-	5	14115903;14116758;14117390;14117549;14117696	14115904;14116759;14117391;14117550;14117697	1;1;1;1;1	ACAGGGT;TCAGACG;TCAGAAT;ACAGACC;CCAGCTC
TCONS_00041645	XLOC_016867:Y57G11C.42	Y57G11C.42	0	0.295	0.295	0.010893	Y57G11C.42e	j	IV:14728533-14745734	+	1	14734344	14734348	4	ATTTCAGATA
TCONS_00005278	XLOC_002079	hum-7	0.615	0.908	0.294	3.45e-07	F56A6.2b.1	=	I:585830-607603	-	4	588757;592692;601542;603474	588763;592693;601543;603475	6;1;1;1	GAGTTTCAGATG;CCAGGAT;TCAGGCC;TCAGAAA
TCONS_00089164	XLOC_040385	epn-1	0.124	0.417	0.293	0.014065	T04C10.2a.1	=	X:14815827-14818701	-	2	14817619;14818171	14817625;14818172	6;1	TAGCTTCAGGAT;GCAGGTC
TCONS_00070481	XLOC_032264	mrck-1	0.091	0.382	0.291	0.073919	K08B12.5b.1	=	V:6257391-6267287	-	2	6258924;6264966	6258935;6264972	11;6	TAGCTTAATTTCAGGAG;AAGCTTCAGGAA
TCONS_00021596	XLOC_008342	vab-23	0.027	0.318	0.29	0.00616	ZK930.3a.1	j	II:11897183-11902649	-	2	11898648;11898992	11898649;11899003	1;11	TCAGGAC;AGCATGATTTCCAGAAC
TCONS_00074541	XLOC_034078:K08F9.1	K08F9.1	0	0.288	0.288	0.000679	K08F9.1a.1	j	V:15134187-15150733	-	1	15138414	15138430	16	TAGGAATTTTAAATTTCAGAAA
TCONS_00090152	XLOC_040785	tps-1	0.036	0.324	0.288	0.076953	ZK54.2a.4	=	X:17467120-17474585	-	1	17467151	17467152	1	AATGTTT
TCONS_00089255	XLOC_040427	fbxa-97	0.291	0.577	0.286	3.16e-05	C18B12.5	j	X:15042955-15045877	-	1	15045353	15045355	2	TTCAGGTT
TCONS_00002740	XLOC_000998	apr-1	0.282	0.566	0.284	0.01282	K04G2.8a.1	=	I:8050042-8057029	+	1	8052482	8052488	6	TAGTTTCAGACG
TCONS_00000496	XLOC_000162:atg-5	atg-5	0.34	0.624	0.284	0.003018	Y71G12B.12c.1	=	I:1709388-1751055	+	1	1712710	1712716	6	AAGTTCCAGACA
TCONS_00001713	XLOC_000610	F27C1.2	0.291	0.572	0.281	0.00023	F27C1.2a.1	=	I:5430163-5431449	+	1	5430761	5430773	12	TAGTTTGCACTTCAGACA
TCONS_00043224	XLOC_017853:Y73F8A.26	Y73F8A.26	0.038	0.318	0.28	0.052021	Y73F8A.26a.1	j	IV:15445367-15477512	+	1	15474602	15474604	2	TAGACAAT
TCONS_00084631	XLOC_038516	cgr-1	0.007	0.287	0.279	0.010224	T27A10.7.1	j	X:3597275-3600762	-	1	3600457	3600475	18	TTCATTAATTCTCGTTTTCAGACA
TCONS_00013249	XLOC_005022	lin-23	0.461	0.739	0.278	0.000306	K10B2.1a.1	=	II:6369916-6374544	+	1	6373805	6373811	6	AAGTTTCAGCAA
TCONS_00031712	XLOC_011969	Y45F3A.4	0.013	0.291	0.278	0.015405	Y45F3A.4.1	j	III:10572474-10583755	-	2	10573363;10573983	10573364;10573989	1;6	CCAGAAC;TTATTTCAGCAT
TCONS_00005272	XLOC_002077	grl-16	0.019	0.296	0.278	0.039328	Y65B4BR.6b.1	j	I:572176-575120	-	1	573894	574073	179	CAGTTGTCGAGCAAGTCGCACCAGTCGCCACATACACCCAGGGGCCAGTCCCAACACCAGTCGAGCAGGTCGTCGAGACTGTTGTCGAGCCACAGCAAGCACCAGAACCAGAACAAGCACCAGAACCACAGCAAGCACCAGAGCCAACCGTAGTCGAGACTGTCCAAGAGGAAATCGTTCCAGAA
TCONS_00008929	XLOC_003387	che-13	0.025	0.301	0.276	0.056786	F59C6.7a.1	j	I:10506999-10515874	-	1	10515213	10515214	1	TCAGGCA
TCONS_00050267	XLOC_021924	C17H12.2	0.09	0.365	0.275	0.003698	C17H12.2.2	j	IV:6786789-6792629	-	2	6788714;6789639	6788724;6789644	10;5	CAGTTTATTTCAGAGA;TTTTTCAGGCG
TCONS_00018059	XLOC_006916:nep-9	nep-9	0	0.274	0.274	0.013953	F18A12.5.1	j	II:3384234-3399646	-	2	3389677;3394419	3389687;3394420	10;1	CAGAAATTTTCAGCTG;ACAGAAT
TCONS_00029443	XLOC_011098:ula-1	ula-1	0	0.274	0.273	1.64e-20	C26E6.8a.1	=	III:4847008-4947317	-	1	4919233	4919239	6	AAGTTTCAGATT
TCONS_00006936	XLOC_002635	trpp-8	0.329	0.602	0.273	0.009504	F46F11.9a.1	=	I:5610374-5616402	-	1	5614684	5614690	6	AAGATTCAGAAG
TCONS_00004939	XLOC_001963	ekl-4	0.21	0.481	0.271	0.018652	Y105E8A.17a.1	=	I:14469505-14499297	+	1	14476345	14476351	6	CAGTTCCAGATA
TCONS_00037904	XLOC_014833	T04B2.3	0.058	0.328	0.27	0.010785	T04B2.3a.1	j	IV:10047357-10050554	+	1	10048602	10048609	7	TCCATTACAGCAG
TCONS_00084120	XLOC_038320:glr-7	glr-7	0.113	0.384	0.27	0.052781	C43H6.9c.1	j	X:2413751-2427882	-	3	2415155;2415392;2416572	2415156;2415393;2416573	1;1;1	GCAGGAG;GCAGTAT;GCAGGTA
TCONS_00003240	XLOC_001240	nra-2	0.243	0.512	0.269	0.004435	T05F1.1a.1	=	I:9620232-9630848	+	2	9621326;9621499	9621335;9621508	9;9	AAGGGTTTTCAGATG;AAGATATTTCAGCAG
TCONS_00010003	XLOC_003817	Y6B3B.1	0	0.269	0.269	0.000738	Y6B3B.1.1	j	I:13692413-13719528	-	3	13700269;13700394;13701242	13700270;13700395;13701486	1;1;244	TCAGGTT;TCAGGCT;CAGAGATCTTCCAATCACAAGACCGGGGTTCGAGTCCCCACTAGGCCAAATATTTTTCTCTAAGTGAGATTGATCTAAACACACTGGGAAAATCGGTTTTTAGTAGTTTCCTAAAAATTTACTCCAATGGCTCAGTGTGATTTTCAACGTCCACCAATCTGAAGTCCGGGGCTCAATTCCCACTAGGTCCAAGTTTTTTTCTTGACCACTTAATTAACTTTCTCAGTTCGTTAACTCTAATTTTCAGGTC
TCONS_00082178	XLOC_037521:syg-2	syg-2	0.045	0.312	0.267	0.091268	C26G2.1b.1	j	X:14653467-14662869	+	2	14654972;14656907	14654974;14656909	2;2	TTCAGACG;TATAGGAG
TCONS_00063230	XLOC_028846:F40A3.2	F40A3.2	0.512	0.778	0.266	0.007592	F40A3.2.1	j	V:7877489-7881403	+	1	7881200	7881227	27	TAGAAGAAGTCATAAAAATGAGAAATTCAGCAA
TCONS_00083538	XLOC_038076:T19D7.7	T19D7.7	0.025	0.292	0.266	0.098365	T19D7.7.1	j	X:672107-686808	-	1	681436	681437	1	TCAGTAT
TCONS_00087719	XLOC_039782	W02H3.1	0.459	0.725	0.266	0.047423	W02H3.1b.1	=	X:11102586-11105512	-	1	11102758	11102759	1	TCAGAAA
TCONS_00053040	XLOC_023072:ZK896.5	ZK896.5	0.011	0.277	0.266	0.05317	ZK896.5.2	j	IV:12872828-12879748	-	1	12878791	12878792	1	ATAGAAT
TCONS_00073312	XLOC_033580	pals-37	0	0.265	0.265	0.004313	C54D10.14a.1	j	V:12437466-12441520	-	2	12438325;12441291	12438326;12441292	1;1	TCAGGGA;GTAGTTT
TCONS_00039305	XLOC_015428:csn-6	csn-6	0.031	0.295	0.264	0.082987	Y67H2A.6a.1	=	IV:13300827-13310818	+	1	13302937	13302952	15	TAGGAATGTTTGTTCCAGGAT
TCONS_00031752	XLOC_011984:Y39A1A.21	Y39A1A.21	0.336	0.599	0.263	0.027697	Y39A1A.21a.1	j	III:10700651-10707173	-	1	10707022	10707024	2	TTCAGGTA
TCONS_00027704	XLOC_010544:toca-2	toca-2	0.538	0.799	0.261	0.077868	K08E3.3a.1	j	III:13752405-13759434	+	1	13759285	13759291	6	AAGTTGCAGGAA
TCONS_00053242	XLOC_023126:Y67H2A.10	Y67H2A.10	0	0.261	0.261	1.02e-08	Y67H2A.10b.1	=	IV:13283001-13297869	-	3	13286102;13288897;13289229	13286111;13288909;13289230	9;12;1	AAGCTTATTAAGAGT;TATGACTACTTTCAGTTA;TCAGCTG
TCONS_00018867	XLOC_007263:F59E12.16	F59E12.16	0.083	0.343	0.26	0.000432	F59E12.16c	j	II:5543580-5657371	-	1	5630253	5630259	6	CAGCTTCAGCCG
TCONS_00038293	XLOC_015009	Y43E12A.3	0.328	0.587	0.259	0.072201	Y43E12A.3a.1	=	IV:10987560-10989214	+	1	10988339	10988347	8	AAGTGTTCCAGATA
TCONS_00030708	XLOC_011554	C14B9.8	0.262	0.522	0.259	1.73e-05	C14B9.8a.1	=	III:8138089-8144691	-	2	8141815;8142020	8141824;8142029	9;9	GAGGATCTTCAGATG;AAGTGTTTGTAGAGT
TCONS_00046775	XLOC_020133:egrh-2	egrh-2	0.113	0.372	0.259	0.044621	Y55F3AM.7d.1	=	IV:984404-990798	-	1	984812	984822	10	CAGCAGCGTTCAGGGT
TCONS_00075395	XLOC_034540	Y20C6A.1	0.028	0.283	0.255	0.008887	Y20C6A.1a.1	=	V:17369714-17377248	-	1	17374451	17374570	119	TAGTCCAATAATCACCCGATCAGCCATCCTTCCGCCTATCAAAACTGAAATAGAAAACGCGGAAGATCATGCCCTCGCCTTGATGATCCACGAGAGCCAAATAATGATCGATATGATTCTAGCAG
TCONS_00000498	XLOC_000162:tln-1	tln-1	0.277	0.531	0.254	0.057118	Y71G12B.11a.1	=	I:1709388-1751055	+	1	1733232	1733297	65	TTAAACCCCCCCCCCCCCTCTTTTTTTATGATAATGTAGTTATTTTAATATTTCAAATTTTGTTTCAGGAT
TCONS_00083682	XLOC_038119:vpat-1	vpat-1	0.241	0.496	0.254	0.06772	F55A4.8b.1	=	X:1035547-1046532	-	1	1040724	1040725	1	TTAGGGC
TCONS_00033345	XLOC_012553	T04C4.1	0.446	0.699	0.253	0.056209	T04C4.1a.1	=	IV:2214428-2235795	+	1	2223715	2223717	2	TGCAGCAT
TCONS_00039744	XLOC_015644:sorb-1	sorb-1	0	0.253	0.253	0.006611	Y45F10D.13a.1	j	IV:13750331-13770495	+	1	13769288	13769294	6	AAGTTCCAGGTC
TCONS_00086058	XLOC_039113:tyra-2	tyra-2	0.004	0.258	0.253	0.038813	F01E11.5c.1	j	X:6994783-7011113	-	2	6997902;7001333	6997903;7001338	1;5	ATAGGCG;AAATTCAGCTG
TCONS_00010806	XLOC_004039	slc-36.2	0.041	0.293	0.252	0.071267	T27A1.5a.1	j	II:522593-530374	+	1	523470	523478	8	CAGAAAACGAGAGC
TCONS_00089788	XLOC_040684	F43B10.1	0.004	0.255	0.251	2.02e-08	F43B10.1a.1	=	X:16638225-16663111	-	1	16640910	16640911	1	ATAGTGT
TCONS_00047430	XLOC_020357	gcy-23	0.036	0.287	0.251	0.054666	T26C12.4.1	j	IV:3282811-3294640	-	2	3283467;3284510	3283468;3284511	1;1	CCAGGTC;TCAGAAA
TCONS_00001082	XLOC_000373	Y47G6A.5	0.029	0.277	0.247	0.085393	Y47G6A.5a.1	j	I:3533085-3539549	+	1	3536332	3536352	20	CAGGCGAAAAAGTACCTGGAGAAATT
TCONS_00073173	XLOC_033509	ZK863.8	0	0.246	0.246	9.36e-06	ZK863.8.1	j	V:12186334-12187758	-	2	12186938;12187418	12186939;12187420	1;2	ATAGGTC;TACAGTCA
TCONS_00076182	XLOC_034859	M04C3.1	0.662	0.907	0.245	0.00337	M04C3.1b.1	=	V:19437898-19445605	-	1	19444942	19444944	2	TTCAGGTA
TCONS_00067042	XLOC_030677	F49H6.5	0.022	0.265	0.243	0.006018	F49H6.5a.1	j	V:16922098-17120791	+	1	17024381	17024395	14	AAGTTGCCTCGATTTAGATA
TCONS_00013355	XLOC_005080	F54H5.2	0	0.241	0.241	0.092915	F54H5.2a.1	j	II:6612898-6629457	+	2	6627484;6628677	6627515;6628679	31;2	CAAATGCTTTATTTTAATCAAAAGTACTTTTCAGTAA;TGCAGTGA
TCONS_00072568	XLOC_033222	pak-2	0.416	0.656	0.24	0.08192	C45B11.1b.1	=	V:11036461-11041645	-	1	11038980	11038986	6	CAGTTTCAGATA
TCONS_00076052	XLOC_034824	Y39B6A.3	0.305	0.545	0.24	0.021909	Y39B6A.3a.1	=	V:19189245-19199231	-	1	19189845	19189851	6	AAGTTTCAGAGC
TCONS_00006852	XLOC_002613	C09D4.4	0.007	0.246	0.239	0.089304	C09D4.4a.1	=	I:5479549-5484643	-	2	5482649;5483691	5482655;5483700	6;9	AAGTTGAAGGAT;CAGTTATTACAGGCA
TCONS_00047580	XLOC_020410:cha-1	cha-1	0.073	0.312	0.239	0.089853	ZC416.8b.1	j	IV:3613828-3624697	-	2	3615699;3617241	3615703;3617243	4;2	GTTTCAGATA;TTCAGACT
TCONS_00012007	XLOC_004522:cyh-1	cyh-1	0.295	0.533	0.238	0.000641	Y49F6B.1.1	=	II:3491178-3510110	+	2	3506757;3508470	3506766;3508476	9;6	CAGAAGTTACAGCGT;TAGTTTCAGGCA
TCONS_00000528	XLOC_000170	Y71G12B.2	0.055	0.291	0.237	0.023309	Y71G12B.2.1	j	I:1816088-1823043	+	1	1817969	1817972	3	CAGAAGTTT
TCONS_00016853	XLOC_006474:snt-6	snt-6	0.295	0.531	0.237	0.030761	C08G5.4a.1	j	II:723787-768176	-	1	749585	749586	1	CCAGATA
TCONS_00019515	XLOC_007549:farl-11	farl-11	0.19	0.427	0.237	0.027337	F10E7.8a.1	=	II:7099586-7105070	-	1	7104924	7104930	6	TAGTTCCAGTTT
TCONS_00033543	XLOC_012620:Y54G2A.45	Y54G2A.45	0	0.236	0.236	0.000243	Y54G2A.45b.1	=	IV:2805339-2812848	+	1	2807848	2807855	7	AAGTTTACAGTTT
TCONS_00029907	XLOC_011264	nmt-1	0.533	0.768	0.235	0.000494	T17E9.2a.1	=	III:6114481-6116331	-	1	6116168	6116174	6	TAGTTTAAGCTT
TCONS_00086585	XLOC_039306:dim-1	dim-1	0.035	0.27	0.234	2.32e-08	C18A11.7a.1	=	X:8050475-8065688	-	1	8057884	8057885	1	TCAGGCT
TCONS_00031076	XLOC_011727	R107.5	0.231	0.464	0.234	0.019369	R107.5a.1	=	III:9051591-9053793	-	1	9052371	9052377	6	AAGTTGCAGGGA
TCONS_00073479	XLOC_033659:ZC443.1	ZC443.1	0.012	0.245	0.233	0.018525	ZC443.1.1	j	V:12806489-12811967	-	1	12808535	12808536	1	TCAGCGT
TCONS_00063916	XLOC_029174:cyp-29A4	cyp-29A4	0.017	0.248	0.232	0.046244	B0331.1.1	j	V:9650479-9658084	+	1	9656040	9656047	7	CAGATTTTGTAGA
TCONS_00065030	XLOC_029704:C27A7.1	C27A7.1	0.203	0.435	0.232	0.012379	C27A7.1a.1	=	V:12131441-12150689	+	2	12132945;12133448	12132948;12133488	3;40	TTTCAGACC;AAAAATCATTGGCAAACATAATGACTATCATTATTTATTACAGAAG
TCONS_00083610	XLOC_038097	igcm-1	0.009	0.241	0.232	0.090065	F39H12.4.1	j	X:845730-851614	-	3	847131;849766;850084	847132;849767;850085	1;1;1	TCAGCCA;TCAGTTT;TCAGTTC
TCONS_00001447	XLOC_000505	ain-2	0	0.231	0.231	1.56e-15	B0041.2c.1	=	I:4652144-4660264	+	1	4657206	4657212	6	AAGATTCAGAAT
TCONS_00024293	XLOC_009357	eri-9	0.001	0.232	0.231	1.3e-21	C26E6.7a.2	=	III:4847008-4947317	+	1	4933376	4933382	6	AAGTTTCAGAGA
TCONS_00013212	XLOC_005008:bpl-1	bpl-1	0.22	0.451	0.231	0.000587	F13H8.10a.1	j	II:6270369-6281102	+	1	6277249	6277341	92	TATACGGCCACGGCTTCGCACTTTTGTTTGCCTTGTTCCGATGAACTTTCCTAGAGTTATTAGCAATGCCCGTCACATTGCTCTACTTTTTACAGGCG
TCONS_00030672	XLOC_011538	mdt-30	0.055	0.286	0.231	0.000189	F44B9.7.1	=	III:8025209-8028082	-	1	8027513	8027522	9	AAGCATATTCAGTAA
TCONS_00003281	XLOC_001258:eat-16	eat-16	0.181	0.411	0.23	0.054666	C16C2.2a.2	=	I:9710962-9737712	+	1	9724967	9724999	32	CAGGAAATTATGTATGAAAACTTTGATATCTTCAGCCG
TCONS_00001905	XLOC_000651:vps-34	vps-34	0.271	0.5	0.229	0.000822	B0025.1c.1	=	I:5768918-6033475	+	1	6029772	6029949	177	CACAGTTTTGGTCTATTTTGAAATCTAACAATTGAGAAACTACAATTTCTGTTTCAAAGAATCAATTATTTTATTCGAAAAGCCTTCCATATTATAATTTTCAACCCAAATTAATTCTACTATGATTTAAAATAACCAAACCAATCAAAAAAAATTTTATCTTGAACTTCGAATTTTCAGATG
TCONS_00065792	XLOC_030049:R10D12.13	R10D12.13	0.075	0.304	0.229	0.025218	R10D12.13c.1	=	V:13962281-13965797	+	2	13962613;13962771	13962680;13962777	67;6	TAGGTATCAAAAATACCTGGAACCAGTAGATGGTCAAATTTTCGCTGATAATGATGATTTTGTGGTTCAGAGT;CAGTTTCAGAAA
TCONS_00012836	XLOC_004845	clr-1	0.404	0.631	0.227	0.005256	F56D1.4d.1	=	II:5466345-5473894	+	1	5466595	5466601	6	TAGCTTCAGATC
TCONS_00090166	XLOC_040793:frpr-7	frpr-7	0	0.227	0.227	0.042108	F39B3.2.1	j	X:17554902-17581302	-	1	17569123	17569132	9	CAGATATTCCAGGAA
TCONS_00002943	XLOC_001094:gls-1	gls-1	0.149	0.375	0.226	0.058238	C36B1.8b.1	j	I:8736211-8742548	+	1	8741189	8741198	9	AAGCTATTGCAGGAA
TCONS_00008644	XLOC_003281	drsh-1	0.095	0.321	0.226	0.000535	F26E4.10b.1	=	I:9780286-9785722	-	2	9781509;9782822	9781518;9782828	9;6	AAGTGGTTTCAGAAC;TAGTTGCAGGAA
TCONS_00002857	XLOC_001037:T19A6.4	T19A6.4	0.177	0.399	0.222	0.07675	T19A6.4.1	j	I:8398677-8403939	+	1	8399370	8399376	6	TAGTTACAGAAA
TCONS_00074391	XLOC_034010:ret-1	ret-1	0.055	0.277	0.221	0.065441	W06A7.3a.2	=	V:14819019-14851829	-	1	14830110	14830122	12	GAGTTCGATTTTCAGCGT
TCONS_00005380	XLOC_002109	mig-1	0.079	0.299	0.22	0.054233	Y34D9B.1a.1	j	I:948278-957404	-	2	949950;950955	949972;950967	22;12	GAGCCATTCAAAAAGAATTTTGAAGTTC;CAGGATCTACTTTAGACG
TCONS_00024776	XLOC_009512	cyk-3	0.592	0.812	0.219	0.018693	ZK328.1a.1	=	III:6020164-6024659	+	1	6022333	6022342	9	AAGATTCTTCAGGTC
TCONS_00055139	XLOC_024220:tag-273	tag-273	0.132	0.348	0.217	0.07431	Y57G11A.1e.1	j	IV:14487085-14505175	-	1	14496488	14496659	171	GGGCGTTCGCCGGCGGTTCATTCTAGGCAGTTCACACCACATCATACTTATATCATCTATACGATCTATTGACTTGCCACCAATCGCCGCGATCCCGAAATTCCAATCCCTCAACTGGACACTAGCCAAAGAGAGAATAGAGAGAATTCATTATAATAAGAGAAATGGTTACAGCCG
TCONS_00029729	XLOC_011202	swp-1	0.125	0.341	0.216	0.000551	B0336.9d.1	=	III:5698429-5705464	-	2	5703109;5705325	5703115;5705364	6;39	TAGTTACAGATT;CTTATGCCTTGCAACTGTTTTAAAAGTAATGTGCATGTTCAGGAA
TCONS_00075912	XLOC_034777:Y17D7B.7	Y17D7B.7	0	0.216	0.216	0.02663	Y17D7B.7	j	V:18780489-18786857	-	3	18781055;18781726;18781805	18781056;18781727;18781806	1;1;1	TTAGCGA;TCAGATA;CCAGAAT
TCONS_00083030	XLOC_037910:F52G3.1	F52G3.1	0.631	0.844	0.213	0.008741	F52G3.1.1	=	X:16963863-16972862	+	1	16967943	16967952	9	AAGCTTTTCCAGGCG
TCONS_00029879	XLOC_011253:npp-10	npp-10	0.344	0.557	0.213	0.049681	ZK328.5b.1	j	III:6013535-6019795	-	2	6019037;6019552	6019043;6019562	6;10	CAGCTTCAGCAT;TTGCAAGTTTCAGCTA
TCONS_00034017	XLOC_012826	ama-1	0.066	0.278	0.211	5.26e-06	F36A4.7.2	j	IV:4247551-4258173	+	1	4248020	4248070	50	ATTTCTCTCAATTTCTTCCTGATTTTTTCGAAAATTCAATTTACCGTTTTCAGATC
TCONS_00002420	XLOC_000889	ztf-15	0.128	0.339	0.211	0.028351	R06C7.9b.1	=	I:7255379-7258700	+	1	7258469	7258477	8	CAGCATTGCAGGAA
TCONS_00007590	XLOC_002909	inx-14	0.376	0.587	0.211	0.01389	F07A5.1a.1	=	I:7339203-7352235	-	2	7350600;7352086	7350606;7352088	6;2	TAGTTGCAGACC;TTCAGTTC
TCONS_00070297	XLOC_032184	F44E7.5	0.476	0.687	0.211	0.045533	F44E7.5a.2	=	V:5778817-5781015	-	1	5779729	5779730	1	TTGGGAC
TCONS_00051547	XLOC_022482	del-2	0.11	0.321	0.211	0.021996	F58G6.6a.1	j	IV:9636912-9642084	-	2	9638173;9639187	9638174;9639190	1;3	GAAGGTC;TTTCAGATT
TCONS_00085907	XLOC_039058	slc-25A10	0.126	0.337	0.211	0.004033	K11G12.5.2	=	X:6723499-6725730	-	1	6725516	6725517	1	TCAGGTT
TCONS_00019924	XLOC_007696	pgp-11	0.001	0.211	0.21	2.02e-08	DH11.3.1	j	II:7995469-8004289	-	1	7996097	7996098	1	TTAGGGT
TCONS_00089232	XLOC_040417	cutl-3	0.287	0.497	0.21	0.001194	F20D1.8.1	=	X:14994097-14999559	-	1	14996949	14996950	1	TCAGTAT
TCONS_00006585	XLOC_002534	imb-1	0.283	0.493	0.21	0.038036	F28B3.8.1	j	I:4918371-4932147	-	1	4924089	4924091	2	TTCAGGCC
TCONS_00068227	XLOC_031243	F26F2.7	0.21	0.419	0.209	0.043561	F26F2.7a.1	=	V:20580989-20590339	+	2	20582074;20584656	20582080;20584674	6;18	AAGTTGCAGAAA;TTCACCGAAATTTTCTTCCAGGAC
TCONS_00031698	XLOC_011968:T21C12.8	T21C12.8	0.013	0.222	0.209	0.020492	T21C12.8a.1	j	III:10551074-10565809	-	1	10552282	10552283	1	TCAGAAG
TCONS_00024502	XLOC_009432	dex-1	0.223	0.43	0.208	0.029543	D1044.2c.1	j	III:5512926-5603756	+	2	5527745;5528829	5527747;5528831	2;2	TCCAGCAA;TAGAGGGA
TCONS_00008381	XLOC_003181	lin-41	0.118	0.326	0.208	0.01051	C12C8.3b.2	=	I:9334811-9342508	-	3	9338804;9341128;9341907	9338816;9341161;9341913	12;33;6	CAGTTTTCTTTTCAGGAC;TTCTCAATTTACACCGAAGAATAACCCAAATTCCAGCAT;CAGACTTGGAAA
TCONS_00074249	XLOC_033958:C53A5.16	C53A5.16	0.337	0.545	0.208	8.66e-06	C53A5.16a.1	j	V:14518307-14522686	-	1	14522189	14522195	6	TAGTTTGAGGTT
TCONS_00065883	XLOC_030089	ZC376.6	0.147	0.353	0.207	0.013277	ZC376.6a.1	=	V:14185690-14192156	+	1	14190162	14190174	12	AAGTTCATTTTCCAGCTA
TCONS_00007924	XLOC_003040	F02E9.5	0.638	0.845	0.207	0.01906	F02E9.5a.2	=	I:8416830-8435864	-	1	8425786	8425793	7	TTCTTTGCAGCAG
TCONS_00028823	XLOC_010882:spe-41	spe-41	0.017	0.225	0.207	0.017634	K01A11.4a.1	j	III:3438880-3453010	-	2	3440219;3442852	3440229;3442853	10;1	TGTGTATTTTCAGCAA;GCAGGTG
TCONS_00026031	XLOC_009990	saeg-2	0.007	0.212	0.205	9.02e-07	T23G5.6.1	j	III:9239246-9242522	+	1	9240337	9240369	32	CATATACACTCAAATCTTAAAATTTAAATTTTCAGCAC
TCONS_00068258	XLOC_031257:mlt-11	mlt-11	0.046	0.251	0.205	0.069629	W01F3.3h.1	=	V:20667208-20678600	+	1	20668173	20668449	276	CAGGTTGAGTCTACCACTACCACAACTGAATCCCCAACCACTGAGGCTTCTACCACAACCACTGAAGCTCCAACCACCACTACTTCCGAGGAGGTCACTACCACTGAGATCACCACTGAAGCTCCAACCACCACCGAAGAGGTGACTACCACTGAGACCACTATAGAAGCTCAAACCACCACAACGACCGAACGCATGTCTCCATCAACCACCAAAACCTCCACCACCACCACTGCCAAACCAACAACAACAAGATCCACAACAACTCAACGTCCTCAGACC
TCONS_00020355	XLOC_007854:sftd-3	sftd-3	0.016	0.221	0.205	0.012318	C18E9.10a.1	=	II:8951923-8997662	-	2	8962711;8963981	8962717;8963987	6;6	AAGTTTCAGAAA;AAGTTTCAGAGG
TCONS_00070158	XLOC_032122	snpc-1.3	0	0.205	0.205	1.1e-06	F08F3.9b.1	j	V:5437083-5439955	-	1	5439166	5439171	5	TAATTCAGAAT
TCONS_00006983	XLOC_002664:mtk-1	mtk-1	0.183	0.387	0.204	0.029181	B0414.7a.1	=	I:5768918-6033475	-	2	5795641;5801108	5795647;5801115	6;7	AAGTTTCAGGAC;AAGTTTTCAGAAT
TCONS_00085558	XLOC_038913	kin-2	0.147	0.351	0.204	0.035093	R07E4.6c.1	j	X:5970645-5984542	-	1	5977838	5977854	16	ATTATGAACAATTATTCAGGTG
TCONS_00080152	XLOC_036641	pes-8	0	0.203	0.203	0.027887	F18G5.2.1	j	X:9251817-9255745	+	1	9254844	9254856	12	CAGGTGGTTCTTGGTGCT
TCONS_00004610	XLOC_001830	sdz-30	0	0.203	0.203	7.1e-10	T04D3.2.1	o	I:13306230-13308787	+	1	13307031	13307033	2	TCCAGAAA
TCONS_00025456	XLOC_009752	ncl-1	0.038	0.24	0.203	0.004675	ZK112.2a.1	=	III:7719790-7739656	+	3	7727739;7731387;7732033	7727770;7731389;7732042	31;2;9	TTTAATTCTGAATCCTAAATTTCATATTTTTCAGCCG;TTCAGATC;AAGAAATTACAGGCA
TCONS_00076158	XLOC_034853:C25F9.5	C25F9.5	0.681	0.883	0.202	0.026414	C25F9.5.1	=	V:19407628-19427056	-	1	19410613	19410615	2	TACAGAAC
TCONS_00073282	XLOC_033568	cdr-4	0.504	0.706	0.202	0.051639	K01D12.11.1	j	V:12407384-12409196	-	1	12408590	12408592	2	TGTAGCTC
TCONS_00008394	XLOC_003185	ppfr-1	0.211	0.412	0.201	0.000872	F16A11.3b.1	=	I:9359074-9390689	-	2	9365150;9372067	9365162;9372068	12;1	TAGAATTTTTTGCAGGCT;TCAGGCA
TCONS_00030830	XLOC_011621	ess-2	0.445	0.647	0.201	0.007099	F42H10.7b.1	j	III:8478381-8491097	-	1	8488813	8488819	6	AAGTTTCAGCCG
TCONS_00035446	XLOC_013653	sams-3	0.702	0.902	0.2	0.001451	C06E7.1a.1	=	IV:5848169-5859976	+	1	5849225	5849318	93	CAGGCTCTACGGGTGTTGGATGATGCGGGAAACGGGGCTGAAGCTTATCGCAACAATATGTTTCTTTACCTGTTACAACGGTTACTTTGATTACAGAAA
TCONS_00024202	XLOC_009315:F17C8.3	F17C8.3	0	0.199	0.199	0.015454	F17C8.3.1	j	III:4722091-4734088	+	1	4732880	4732887	7	TAGCCACCAGTGA
TCONS_00010722	XLOC_004010	far-7	0.768	0.968	0.199	0.007546	K01A2.2a.1	=	II:319784-323098	+	1	320419	320452	33	AAACCATAATTTCAGTAATTCTTTGATAATTTTCAGACT
TCONS_00032571	XLOC_012285:W06F12.2	W06F12.2	0	0.198	0.198	1.01e-07	W06F12.2b.1	=	III:13726640-13741023	-	1	13728935	13728947	12	CAGCGTTGCTTTCAGACC
TCONS_00071855	XLOC_032915:ZK287.4	ZK287.4	0	0.198	0.198	0.008618	ZK287.4a.1	j	V:9677123-9686717	-	1	9681684	9681685	1	TCAGTTG
TCONS_00026538	XLOC_010190:D2045.9	D2045.9	0.145	0.342	0.197	0.049672	D2045.9.1	=	III:10471236-10483926	+	1	10475960	10475970	10	AAAAAGTTTCCAGAAT
TCONS_00076691	XLOC_035037	ipla-3	0.238	0.434	0.196	0.000414	W07A8.2c.1	j	V:20717871-20729271	-	2	20727305;20728748	20727311;20728754	6;6	TAGTCTCAGAGC;TTCGTTTAGATT
TCONS_00087826	XLOC_039820	gcy-9	0.007	0.203	0.196	0.018652	ZK455.2.1	j	X:11160980-11392852	-	5	11332606;11333453;11333999;11335666;11337374	11332608;11333455;11334002;11335667;11337391	2;2;3;1;17	TACAGGGA;TTTAGATC;TTTCAGTTA;ACAGGTA;TAGTAATTCTTTTTTCTCAGAAA
TCONS_00037309	XLOC_014617	alp-1	0.056	0.251	0.194	0.000679	T11B7.4d.1	=	IV:8852494-8867765	+	1	8860357	8860546	189	TAGTGAGATCATGGTGGTGAGATGATGACAACAACGAGAATTGAAGTTGAAAAGAAGTATCTGTAGGAGATAATTATTCATTTATTTATGTTTATCATCCGGTGTATTTCAGTAGTATTCTAGTCAAATAAAATTGTTCAATGAGCACGCACTCACCATAATTCCATCATATTCTAACAACATTCTATCTAGGTT
TCONS_00023317	XLOC_009001:T20H9.6	T20H9.6	0	0.194	0.194	0.057118	T20H9.6.1	=	III:2233311-2257117	+	1	2246686	2246764	78	TAGATTTGACAAGTGAAATAAGCGCTTGAGCCACATAACAGTTTATGTTCAAACACAAAACTGTACGTATCCATGATTCAGTCA
TCONS_00028807	XLOC_010873	hecw-1	0.035	0.23	0.194	0.001273	F45H7.6b.1	=	III:3377407-3396276	-	1	3387825	3387835	10	CTCAAAATTTCAGCAA
TCONS_00015044	XLOC_005768	mks-5	0	0.193	0.193	0.029399	C09G5.8a.1	j	II:10690451-10729317	+	1	10726493	10726494	1	CAGAAAA
TCONS_00029451	XLOC_011099	set-2	0.182	0.375	0.193	0.005418	C26E6.9b.1	=	III:4847008-4947317	-	1	4925737	4925746	9	AAGCCTTCTCAGACT
TCONS_00031172	XLOC_011762	clip-1	0.044	0.235	0.19	0.055221	M01A8.2a.1	=	III:9257258-9269081	-	2	9263109;9266074	9263110;9266082	1;8	GCAGACG;TAATATTTCAGCTA
TCONS_00031160	XLOC_011757	T23G5.2	0.574	0.764	0.19	0.009244	T23G5.2a.2	j	III:9231414-9238053	-	1	9236322	9236328	6	TTTTTTCAGTAG
TCONS_00018538	XLOC_007128	R05F9.9	0.667	0.856	0.189	0.023669	R05F9.9.1	=	II:4899858-4902159	-	1	4901973	4901983	10	AAGTTATTTTCAGATG
TCONS_00070939	XLOC_032472:C05C8.5	C05C8.5	0.116	0.303	0.187	0.017224	C05C8.5.1	j	V:7231189-7237285	-	1	7234491	7234499	8	TAGTTTTCCAGCTC
TCONS_00006082	XLOC_002327	W05F2.4	0.018	0.205	0.187	0.039373	W05F2.4a.1	j	I:3374558-3407865	-	6	3380306;3395956;3396787;3400372;3402591;3402749	3380307;3395958;3396789;3400386;3402592;3402750	1;2;2;14;1;1	TCAGCCA;TTCAGAGA;TTCAGGTG;TATACAACCATTTTCAGTCT;TCAGCTG;TCAGATG
TCONS_00013611	XLOC_005165	ZK1127.3	0.29	0.476	0.186	0.017965	ZK1127.3.1	j	II:7055284-7058014	+	1	7055926	7055933	7	TAGCTTTCAGATA
TCONS_00063632	XLOC_029029:unc-23	unc-23	0.103	0.288	0.185	0.049672	H14N18.1a.1	=	V:8932617-8944063	+	1	8937215	8937403	188	AAATTCGAAAAATACAGTTTCGAAATCGATTTTCATTTGCCTCTGCTGAAATATGATTGAAAAACGAGAAAAAAGTGGGAGGAGTCACTCTTATCAAACAGAAACACAAGAGACACTAACCAACTCACTCATTCTTATCTTTTTTGATTCTAACTTTCATTTCTACCATCCTAATATTCAGCATGTTTCAGAAC
TCONS_00051512	XLOC_022465	npr-2	0	0.185	0.185	0.009504	T05A1.1a.1	j	IV:9568600-9586124	-	3	9569406;9570006;9570561	9569407;9570007;9570562	1;1;1	CCAGAAT;TCAGGAA;GTAGAGT
TCONS_00031701	XLOC_011968:T21C12.8	T21C12.8	0.459	0.644	0.185	0.05946	T21C12.8a.1	=	III:10551074-10565809	-	1	10552282	10552283	1	TCAGAAG
TCONS_00083979	XLOC_038249	igcm-4	0.004	0.189	0.185	0.002111	Y102A11A.8.1	j	X:2039306-2046360	-	1	2045924	2045925	1	TCAGATT
TCONS_00064732	XLOC_029565	C55A6.10	0.003	0.187	0.184	0.034963	C55A6.10a.1	=	V:11505241-11508271	+	2	11505820;11506871	11505827;11506877	7;6	CAGTTTTCAGTTT;AAGCTATAGGAT
TCONS_00030760	XLOC_011584:sas-4	sas-4	0.007	0.191	0.184	1.02e-14	F10E9.8.1	=	III:8279107-8331919	-	1	8318440	8318445	5	AAGTTCAGCCT
TCONS_00018979	XLOC_007312	F55C12.5	0.233	0.417	0.184	0.005353	F55C12.5b.1	=	II:5867247-5873641	-	1	5873482	5873517	35	TCTTAAATAATTAAACAATTTTTCTTTGGGAATTAAAGGCT
TCONS_00046639	XLOC_020080:M04G7.3	M04G7.3	0.044	0.227	0.183	0.091212	M04G7.3a.1	j	IV:415634-570875	-	5	461915;462076;462489;463170;481167	461916;462078;462490;463171;481169	1;2;1;1;2	CCAGAAC;TCCAGGTT;GCAGTTT;CCAGCTC;TGCAGCAG
TCONS_00021693	XLOC_008367	pqn-87	0.031	0.214	0.183	0.026392	Y57A10A.18e.2	=	II:12203308-12225086	-	3	12209830;12211173;12215766	12209839;12211182;12215775	9;9;9	AAGGTCCTCCAGGTT;AAGTATCTTCAGGGC;CAGAGTTTCCAGGGC
TCONS_00009063	XLOC_003458	tag-296	0.189	0.37	0.181	0.000992	F49D11.9a.1	=	I:10933809-10945690	-	1	10934236	10934239	3	TAGCAGGAT
TCONS_00006724	XLOC_002581	erm-1	0.527	0.707	0.18	0.074631	C01G8.5a.1	=	I:5284057-5291614	-	2	5286449;5290518	5286450;5290520	1;2	ACAGGAG;TTCAGATC
TCONS_00072557	XLOC_033220	pptr-2	0.171	0.351	0.18	0.063017	C13G3.3a.2	=	V:11027152-11030917	-	1	11029270	11029282	12	CAGATTTAATTTCAGGGC
TCONS_00062001	XLOC_028277	unc-62	0.043	0.222	0.179	0.00128	T28F12.2a.2	=	V:4494126-4511665	+	2	4503957;4509878	4503963;4509879	6;1	AAGTTTCAGGGA;GCAGGTT
TCONS_00008792	XLOC_003344	lid-1	0.071	0.251	0.179	0.008298	C25A1.12a.1	=	I:10191272-10192894	-	1	10192113	10192128	15	CAGAATACATGGCTTCAGATT
TCONS_00052001	XLOC_022649	F01D4.5	0.004	0.183	0.179	0.00472	F01D4.5b.1	=	IV:10482628-10483776	-	1	10482799	10482809	10	CAGTTTTTTACAGGCT
TCONS_00020158	XLOC_007781	glb-27	0.026	0.206	0.179	0.07343	W01C9.5b.1	j	II:8533094-8556928	-	2	8547996;8553035	8547997;8553037	1;2	ACAGGAT;TCCAGAAA
TCONS_00051694	XLOC_022546	dur-1	0.026	0.203	0.177	0.071208	F25H8.5k.1	j	IV:9916529-9929792	-	2	9924651;9924758	9924652;9924759	1;1	TCAGAAG;TCAGATA
TCONS_00021218	XLOC_008198	F45E10.2	0.117	0.292	0.176	0.08071	F45E10.2b.1	=	II:11044134-11089465	-	1	11054493	11054578	85	GGGAAAAAGTGCGGAAAACGAGTTAGTTTCTACGACAATGGCTTCCTCGGTCAAAGTTACACCAGTTAAAGATATTGCTCATCTTGAGGAA
TCONS_00048011	XLOC_020573:yars-2	yars-2	0	0.176	0.176	1.31e-05	K08F11.4b.1	=	IV:4706776-4712624	-	1	4712019	4712023	4	CCTTCAGAAC
TCONS_00036726	XLOC_014390	F13B6.1	0.005	0.18	0.175	0.079543	F13B6.1.1	j	IV:7456524-7458214	+	1	7456748	7456772	24	TTCAGACTCGTTCCTGAAATTCTCCGATTC
TCONS_00038025	XLOC_014899	mask-1	0.252	0.427	0.175	0.045274	R11A8.7a.1	=	IV:10374904-10387318	+	2	10378657;10381653	10378669;10381659	12;6	TAGACGAGATTACAGGGA;CAGTTTCAGTGA
TCONS_00009881	XLOC_003780	pde-1	0.06	0.236	0.175	0.094906	T04D3.3b.1	=	I:13310762-13319152	-	5	13311678;13311908;13312220;13313819;13314277	13311684;13311910;13312221;13313828;13314278	6;2;1;9;1	TAGTTCCAGACG;TACAGGTT;TCAGAAT;CAGTTTTTCCAGACG;TCAGACT
TCONS_00024126	XLOC_009288:wdr-48	wdr-48	0.107	0.28	0.174	7.65e-05	F35G12.4a.1	=	III:4578852-4583893	+	1	4580831	4580840	9	AAGAAATTATAGTGA
TCONS_00067683	XLOC_031004	nhr-65	0.068	0.242	0.174	0.02702	Y17D7A.3b.1	j	V:18837730-18845447	+	1	18841199	18841200	1	CAGAGTT
TCONS_00002097	XLOC_000751	K04F10.3	0.085	0.257	0.173	0.007283	K04F10.3b.1	=	I:6358584-6360457	+	1	6358792	6358798	6	AAGTTACAGGAC
TCONS_00017629	XLOC_006752	tsr-1	0.066	0.239	0.173	0.004019	F53G2.6a.1	=	II:2460838-2473468	-	3	2464111;2465447;2471236	2464113;2465453;2471449	2;6;213	TTCAGATG;AAGTTTCAGGCA;AAAATTCCTAAATTTCTGTGACTTGTGTGCTTCTATCCTAATTGATGGTTTGAATAGTTGGTATTCTCGGCTGAAACATGCAATAAATACCGTATTCCAGCCAACAATTTGTGCAATAGAGCACATTTGTCACCGGGGATGCGGAAGCTATGCCCAAATTTTCATTTTTCACTCAAAAACTTGCAATTTTTTCCATTTTTTCAAATTTTTTTGCAGTCG
TCONS_00076230	XLOC_034867	Y43F8B.1	0.037	0.207	0.17	0.00079	Y43F8B.1c.1	=	V:19534879-19546204	-	2	19535903;19537633	19535904;19537634	1;1	GCAGGTC;TCAGACA
TCONS_00082218	XLOC_037537:C05G5.2	C05G5.2	0.161	0.33	0.169	0.032362	C05G5.2a.1	=	X:14747266-14760963	+	1	14750007	14750014	7	TAGCTTTCAGGAA
TCONS_00025057	XLOC_009613	wdr-4	0.51	0.679	0.169	0.071208	Y102E9.2a.1	=	III:6725788-6728058	+	1	6726486	6726495	9	TAGTGTTCTCAGACC
TCONS_00073686	XLOC_033750	uig-1	0.023	0.191	0.168	0.073068	F32F2.1b.1	=	V:13273083-13295978	-	3	13273763;13274768;13275249	13274251;13274815;13275251	488;47;2	TTTTTGAACACGTACTAACTTTTTGATTGTTTTATTGAAAAACACGAAATATTAATGAAAACTGATGTGTTCACAGTTATAACCGGATAATTTTAAAATGTGTTTAGCTCCCCTTTTTTGTAATGTGCAAGTATTTTCTGATATTTTTTGTAAACGAATCAACGGAAAAATCTATGCCATGTTAACAGCACGGTACATTAAAGTTAGAGTACATAGAATTAGAAAAAATAGAACATTTGATACTGAAGCTCGACGTTAAAGGGATGTAGTCTTTGGAATAATGTCTTGCAAAAACTCTGCAATTTAAAGAGTTTTAGTGGTTTTCAATTGTGATCGTATCTGAATAAGTACGGGAAATAAGAACCCGCCTCGAATGGTTTTTTAATATGAGTGGTCATG…
TCONS_00086600	XLOC_039311	catp-5	0	0.168	0.168	7.06e-06	K07E3.7c.1	j	X:8089796-8101487	-	2	8094368;8096430	8094369;8096432	1;2	AAAGGCA;TGCAGTGT
TCONS_00047628	XLOC_020423:Y37E11AM.2	Y37E11AM.2	0.081	0.249	0.168	0.074452	Y37E11AM.2a.2	=	IV:3715788-3726012	-	1	3723529	3723538	9	AAGAATTTCCAGATT
TCONS_00026875	XLOC_010279	T28D6.5	0	0.166	0.166	0.000296	T28D6.5d.2	j	III:11306559-11347560	+	2	11337438;11337937	11337443;11337942	5;5	CAGACCGATGA;CAGGAGTACTT
TCONS_00019401	XLOC_007509	slc-36.5	0.039	0.204	0.166	0.002418	C44B7.6b.1	=	II:6872828-6877089	-	1	6873638	6873834	196	CAGCAACTGGAAACGGTTTTGCTCTTGAGCAACACATCTTGCCAAAGAAGGGGAAAAGAAGATTTGTAGCTGTCTTTGAGCAAGAAATGACTGGGTGTATTTCTCAATTGGCACGAGTTCCAAATGTGTTAGCTCCACCCAGTTTAGAAGACCTTTGCCATGAAAGCAAATAACCAAAAAAGAAAGTAATTCGTTTCAGGAC
TCONS_00087209	XLOC_039600	ipla-2	0.679	0.845	0.166	0.072215	F47A4.5.1	j	X:9833344-9838880	-	1	9835447	9835448	1	ACAGCCT
TCONS_00013377	XLOC_005085:T19D12.1	T19D12.1	0.19	0.355	0.165	0.095293	T19D12.1d.1	j	II:6661334-6673752	+	1	6668681	6668795	114	CAGCATCCCCATCGACGACAGGAGCCACCTCAACTGCTAGTCCTTCAACTATCACATCATCAGCACCTACTTCCCAGTCGCATTCTCCTTCATCCACTATGACGTCAACTGTTCCAGTGA
TCONS_00087683	XLOC_039766:del-5	del-5	0.064	0.229	0.165	0.050895	F59F3.4.2	j	X:11004962-11009070	-	3	11005187;11005697;11007380	11005188;11005698;11007381	1;1;1	GCAGTAC;GCAGACG;TTAGACT
TCONS_00064878	XLOC_029633	D2023.1	0.001	0.165	0.164	1.95e-06	D2023.1f.1	=	V:11789549-11800640	+	1	11799796	11799846	50	ATTGAATCTCTCTATTCATTTACCAATTTATAACTTAAATTAATATTTTTCAGAAA
TCONS_00079546	XLOC_036362:ref-2	ref-2	0.003	0.166	0.163	0.035163	C47C12.3b.1	j	X:7739555-7750010	+	1	7745797	7745815	18	TTTACAGAACCTTATTTTCAGACA
TCONS_00015228	XLOC_005856	saps-1	0	0.163	0.163	2.67e-19	C47G2.5b.1	=	II:11297240-11301254	+	1	11298257	11298263	6	AAGTTTCAGACG
TCONS_00065563	XLOC_029946:Y2H9A.6	Y2H9A.6	0.14	0.303	0.163	0.041542	Y2H9A.6a.1	=	V:13438417-13445328	+	1	13444396	13444402	6	CAGGTTTAGGAA
TCONS_00085032	XLOC_038692	C46C11.4	0.01	0.172	0.162	0.021079	C46C11.4.1	j	X:4644345-4647297	-	1	4646773	4646775	2	TTCAGGGC
TCONS_00066186	XLOC_030217	mpst-3	0.003	0.164	0.161	1e-06	H12D21.7c.1	j	V:14895646-14899013	+	1	14897046	14897058	12	CAGACTGTGGCTGCGTAT
TCONS_00026263	XLOC_010073:cbp-1	cbp-1	0.025	0.186	0.161	0.046518	R10E11.1a.1	=	III:9757615-9774857	+	2	9768412;9768680	9768421;9768713	9;33	CAGCTTTTACAGGAA;CAGCCGATACCACACAAACTACAAAAAAATGTTCAGTCG
TCONS_00052210	XLOC_022736	mogs-1	0.136	0.297	0.161	0.097667	F13H10.4b.1	=	IV:11016228-11021902	-	1	11018622	11018631	9	TAGTTCTTTCAGAAC
TCONS_00013085	XLOC_004944:egl-44	egl-44	0	0.16	0.16	0.000339	F28B12.2i.1	j	II:5928802-5941664	+	1	5933493	5933494	1	CCAGACT
TCONS_00031665	XLOC_011955:H04D03.2	H04D03.2	0.237	0.398	0.16	0.073349	H04D03.2a.1	j	III:10428333-10442657	-	1	10438415	10438421	6	CAGTTTCAGCAA
TCONS_00009480	XLOC_003616:F58D5.2	F58D5.2	0.041	0.2	0.159	0.008959	F58D5.2a.1	=	I:12060270-12068668	-	1	12066330	12066362	32	ATGCAAATAAAAAATAGTTTTTCTTTATTTTTCAGGAA
TCONS_00006921	XLOC_002630	tns-1	0.18	0.338	0.159	0.035428	M01E11.7f.1	=	I:5579664-5607529	-	1	5587928	5587929	1	TCAGACA
TCONS_00018795	XLOC_007239	ZK177.8	0.107	0.267	0.159	0.01787	ZK177.8a.1	=	II:5503965-5513775	-	1	5511208	5511210	2	TTCAGCTG
TCONS_00023681	XLOC_009121	phf-15	0.012	0.17	0.158	0.00462	Y53G8AR.2a.1	=	III:3311422-3331765	+	2	3323058;3323356	3323075;3323367	17;11	CAGTTTTTCACTGATTTCAGGCT;CAGTTTTTTTTCAGAAA
TCONS_00088284	XLOC_040021	npr-4	0.075	0.234	0.158	0.08534	C16D6.2b.1	j	X:12536825-12551961	-	6	12538090;12539594;12539804;12540218;12540591;12540859	12538092;12539617;12539806;12540220;12540593;12540862	2;23;2;2;2;3	TTCAGACC;TAGACTCTTCTGAAGTTAGTATTCAGGTA;TTCAGCTG;TGCAGATT;TACAGATC;TTTCAGAAT
TCONS_00002904	XLOC_001072	lmd-1	0.674	0.831	0.157	0.026671	F43G9.2a.1	=	I:8609924-8615175	+	1	8610349	8610357	8	AAGATTTACAGATA
TCONS_00052792	XLOC_022968	phy-2	0.539	0.695	0.157	0.065426	F35G2.4.1	=	IV:12211097-12216472	-	1	12214473	12214475	2	TCCAGATC
TCONS_00005948	XLOC_002291:mek-2	mek-2	0.416	0.573	0.157	0.026704	Y54E10BL.6.1	=	I:2986103-3015365	-	1	3008858	3008859	1	CCAGATG
TCONS_00070529	XLOC_032292:gfi-1	gfi-1	0.198	0.353	0.156	0.045282	F57F4.3.1	j	V:6392540-6408783	-	1	6393696	6398944	5248	CAGCAATATCCTCTGCTACGTCGGATTCTATGCCAACAACACTACTCCAGGATTCGGATCAGGGGACACCGTCACTTGCTCCGCAGGAAATGTATGTACCAGTGTTTCTGGAGTCTACAACGGATACGACGCTGCTGCCTACGCTTGCATGCCACAAGGACTTTGCGACGGCATCTTCCCAAATATTGACCCAAATAATCCAATCGCCTGCACCAATCTCGCTGGAACCAACATTCAAGGATGCTGCTGTTACAAGCAAGATTGTACTAGCCTCGCTCCAATGAACAACCCACCAACTCCATCTCCATGGAACAAGAACAACCAGACATGCTATCAAGGAATTTCCGTCAACGGAGCTCTCTTGTATGGAGGATCCTTCTCTCAATGCTTGGGAGAATG…
TCONS_00011781	XLOC_004418	lido-7	0	0.155	0.155	3.46e-08	K08A2.4.1	j	II:2988053-2991314	+	1	2990969	2990985	16	TAGGTTTTCTTTTTTGCAGAAC
TCONS_00029821	XLOC_011234	dpff-1	0.034	0.189	0.155	0.039186	C28H8.9a.1	j	III:5903551-5917585	-	2	5905602;5905906	5905614;5905912	12;6	TAGTTCGATTTGCAGAAA;AAGTTGCAGACT
TCONS_00019565	XLOC_007574	clh-3	0.02	0.175	0.155	0.049124	E04F6.11a.1	=	II:7217954-7225648	-	2	7218478;7221223	7218484;7221232	6;9	CAGTTTCAGGCT;AAGATATTTCAGGAA
TCONS_00014413	XLOC_005506	tdp-1	0.146	0.3	0.154	0.087833	F44G4.4a.1	=	II:8997826-8999722	+	1	8998933	8998942	9	CAGAGTTTGCAGGAC
TCONS_00076791	XLOC_035076:Y73B3A.13	Y73B3A.13	0	0.153	0.152	0.030018	Y73B3A.13.1	j	X:117303-139981	+	1	131008	131020	12	AAGTTCCAATTTCAGAAA
TCONS_00019398	XLOC_007507	clhm-1	0	0.151	0.151	0.064735	C44B7.4.1	j	II:6868945-6871185	-	1	6869983	6869985	2	TACAGTAC
TCONS_00087242	XLOC_039612:nra-3	nra-3	0	0.15	0.15	0.00132	C17G1.4a.1	j	X:9925727-9938674	-	1	9927014	9927024	10	TAGGTTATTACAGGCC
TCONS_00023560	XLOC_009072	H05C05.1	0.083	0.23	0.148	0.0922	H05C05.1c.1	j	III:2910819-2960574	+	3	2946915;2957274;2958090	2947091;2957349;2958233	176;75;143	CTACCGTACTATTTTTAGCGGATTTTTTTTCACTTTATTTTCACCGGTTTTTCGCGATTTTTCACTCATTTTCCATCGATTTTTCGCGTTTTTTCGCGTTTTTTCACACATTTTTCACACATTTTTCATGAAAAATTCAATTTTCTCCATTATTTTTCTAATTTCAGACATTTTTACAGCGA;TAGAATTACTGTAGTTTTCGTGGTGGGACCCAATTTGGTGGCCCTGAAAAATTTCCAAAATTTCCAAAATTTTTGCAGAAT;TTCACGAAGTTTACCTTTGTTTCACAAATGCTAAATTTCTCTCGAGATTTTTGGAATTTTTTCGTACTTTTTTTTTTGGCAAAATCGAAATTTTGTCAAGAAAAAAAAATTAATTTTATGCCATTAAATTTGTT…
TCONS_00032277	XLOC_012173	aakg-1	0.01	0.157	0.148	0.046528	Y111B2A.8a.1	=	III:12537787-12575976	-	1	12540399	12540401	2	TTCAGTGG
TCONS_00010500	XLOC_003987:egl-26	egl-26	0.063	0.21	0.147	0.019137	C23H3.1a.1	j	II:66611-87823	+	1	70506	70509	3	TAGAAGAAT
TCONS_00037353	XLOC_014626:cfim-2	cfim-2	0.004	0.151	0.147	0.076484	D1046.1a.2	=	IV:8926192-8932791	+	2	8926472;8927918	8926478;8927924	6;6	TTGATCCAGAAA;TAGTTCTAGACC
TCONS_00060603	XLOC_027648	arid-1	0.415	0.562	0.147	0.074876	Y108G3AL.7a.1	=	V:186163-201281	+	1	198917	198926	9	CAGTCTTTGCAGCGT
TCONS_00000942	XLOC_000311	cogc-3	0.281	0.428	0.147	0.061205	Y71F9AM.4a.1	j	I:2931447-2947152	+	1	2943071	2943077	6	TAGTTTCAGGTC
TCONS_00021433	XLOC_008277:ooc-3	ooc-3	0.179	0.325	0.146	0.082987	B0334.11a.1	j	II:11493230-11500464	-	2	11495088;11495314	11495094;11495321	6;7	TAGTTTCAGCCT;CTTGTTTCAGATG
TCONS_00021764	XLOC_008404	daf-22	0.022	0.167	0.145	0.047913	Y57A10C.6.1	j	II:12423513-12425832	-	2	12425105;12425694	12425107;12425697	2;3	CCCAGGAA;TTCCAGAAA
TCONS_00024622	XLOC_009455	arle-14	0.235	0.379	0.144	0.056362	B0336.5a.1	=	III:5692895-5693938	+	1	5693255	5693264	9	CAGAAGTTGCAGCCA
TCONS_00024714	XLOC_009490	hpo-10	0	0.144	0.144	2.32e-08	F01F1.1a.1	=	III:5879488-5882923	+	2	5879826;5881222	5879845;5881231	19;9	CAGTTCTTCTTTTTCTTTACAGAGA;AAGTATTTACAGGAA
TCONS_00064910	XLOC_029644	hmp-1	0	0.143	0.143	0.002768	R13H4.4a.1	=	V:11844718-11852309	+	1	11851623	11851632	9	AAGAGTTTGCAGACG
TCONS_00075963	XLOC_034793	ptr-22	0.073	0.217	0.143	0.023924	Y80D3A.7a.1	j	V:18919256-18934830	-	4	18919606;18921321;18922453;18928089	18919608;18921322;18922454;18928104	2;1;1;15	TTCAGACA;TCAGACC;TCAGAAA;TCAGTATTATAATTACAGATA
TCONS_00071352	XLOC_032690	hsp-17	0.113	0.255	0.142	0.039267	F52E1.7b.2	=	V:8383921-8386268	-	1	8385554	8385557	3	TAGCAGATT
TCONS_00075724	XLOC_034680:Y37H2C.1	Y37H2C.1	0.051	0.193	0.142	0.035163	Y37H2C.1	j	V:18272563-18350464	-	3	18273355;18274208;18277633	18273356;18274210;18277786	1;2;153	TCAGTTC;TTAAGAGA;AGTGATGGCTGGTACTTTCAGCAACTTGTTTTTGAAATATCTAAATTTCAGCTATAAATAGCGAGTTTTTTCTCGAGATTTTTTCGCTGCTGAAAATGCTCAATGTTTTTGTTTCTGTCTGCATTTTCCCGCTGATTTGCCCTGAAGAGTTTATAGACT
TCONS_00069889	XLOC_031984	sut-2	0.157	0.298	0.141	0.013968	Y61A9LA.8.1	=	V:4558253-4585168	-	1	4562936	4562942	6	CAGTTTCAGTAT
TCONS_00016208	XLOC_006265	nurf-1	0.005	0.146	0.14	0.059285	F26H11.2i.1	=	II:14390717-14407905	+	2	14397085;14400792	14397091;14400798	6;6	CAGTTCCAGAAT;AAGTTCCAGGCT
TCONS_00014505	XLOC_005543:ZK1067.2	ZK1067.2	0.075	0.215	0.14	0.005725	ZK1067.2b.1	j	II:9210218-9223152	+	1	9215213	9215217	4	CAGACCAATT
TCONS_00028716	XLOC_010840	cutl-25	0.027	0.166	0.139	0.086669	Y55D5A.6.1	j	III:2995486-3051948	-	1	3045006	3045007	1	TCAGCCT
TCONS_00014745	XLOC_005637	C05C10.2	0.002	0.141	0.138	0.002042	C05C10.2b.1	j	II:9918046-9930830	+	2	9922223;9930448	9922225;9930454	2;6	TTCAGGAT;TAGTTTCAGAAA
TCONS_00025526	XLOC_009780	npp-15	0.092	0.229	0.138	0.009767	C29E4.4.1	j	III:7929012-7932993	+	1	7929179	7929194	15	TAGATTGGCACGCTTCAGCTC
TCONS_00015856	XLOC_006122	bath-45	0.001	0.139	0.138	0.052055	F29C12.5.1	j	II:13122212-13125161	+	1	13122940	13123026	86	TGATTTCAGAGCTGCATTGAATGAAATTCTCTGAATTTTGTCAAATTGTTGCTTATTTTCTTCTCAACTTCAAATGTTTTAAATTTCAGAAA
TCONS_00072097	XLOC_033000:wdr-20	wdr-20	0.143	0.281	0.138	0.050631	C08B6.7b.1	=	V:10125051-10134356	-	1	10130877	10130894	17	AAGTTTTCCAAGTTACTTAGGCG
TCONS_00014244	XLOC_005436	aptf-4	0.01	0.146	0.137	0.07433	F28C6.1.1	j	II:8590478-8593693	+	1	8590984	8591008	24	CCATCGATATAATGTTTTTCTTTTTAGAAT
TCONS_00048809	XLOC_021071:unc-5	unc-5	0	0.137	0.137	1.13e-08	B0273.4c.1	j	IV:5495643-5528338	-	1	5499506	5499507	1	TCAGTTG
TCONS_00088602	XLOC_040153:C29F7.3	C29F7.3	0.044	0.181	0.137	0.014669	C29F7.3.1	j	X:13418840-13430197	-	1	13419902	13419934	32	GTTTGAAACATTTGCATCAAATTTCTATTTTGCAGACC
TCONS_00047846	XLOC_020504	nhr-78	0.014	0.151	0.137	0.024233	F36A4.14.1	j	IV:4273975-4284199	-	1	4277118	4277119	1	TCAGAAC
TCONS_00051832	XLOC_022598	pxf-1	0.116	0.253	0.137	0.021249	T14G10.2b.2	j	IV:10162007-10176484	-	1	10174339	10174341	2	TATAGGAG
TCONS_00013917	XLOC_005303	cki-2	0	0.134	0.134	0.000214	T05A6.2a.1	=	II:7813955-7820301	+	2	7816661;7816825	7816692;7816828	31;3	ACTATTTCAAATTCTCTTATCAAAATTATTTCAGAAA;TAGCAGGTT
TCONS_00021146	XLOC_008163	F44F4.3	0.015	0.149	0.134	0.085624	F44F4.3.1	=	II:10884704-10887996	-	1	10885252	10885254	2	TTCAGTTT
TCONS_00050657	XLOC_022118:F55G1.15	F55G1.15	0.01	0.144	0.134	0.031462	F55G1.15.1	j	IV:7491533-7502499	-	1	7499055	7499071	16	ATCAAAAAAAAAGTTTCAGATC
TCONS_00082088	XLOC_037477	jmjd-3.2	0	0.132	0.132	3.46e-08	F23D12.5.1	j	X:14447671-14453885	+	1	14448774	14448905	131	TAGGGGTCGCAACATGCGGCATTTCTTTAAATTTCCTCAAAAGCTAGTAGATTCTCCAATTGTCAGCACAAATGATTCTGAACCAATTAATGAACAAGTTTATTCAACACAAAGTAATCATGGCGAGCTTCAAGATA
TCONS_00014696	XLOC_005620	nos-3	0	0.131	0.131	9.86e-08	Y53C12B.3a.1	j	II:9721010-9768271	+	2	9746715;9749849	9746717;9749856	2;7	TACAGTCA;AAGTTTCCAGAAT
TCONS_00027849	XLOC_010591:magu-1	magu-1	0.055	0.186	0.131	0.004781	Y55B1BR.4.1	j	III:333253-482322	-	1	469693	469700	7	TAGTTTTCAGTTC
TCONS_00036708	XLOC_014382	unc-82	0.004	0.134	0.13	0.022085	B0496.3e.1	j	IV:7424497-7445504	+	4	7428926;7437441;7440203;7443007	7428934;7437479;7440282;7443052	8;38;79;45	CAGGTGGACGAATG;ATTGATATTTTAGATTTAGAACTAACCGGCTTTTGATTTAGGCA;TATGTATATTTTAACGATTTCTGTGGAATAAATTCACCCGGTCCTCTATTTGCTCCCCCGTGGCCACAAATTATTTTTCCAGACA;CAGCATGAATTTCTTGATCAACTTCTAAGCATGCGTTTCATTCTCCAGGTG
TCONS_00029675	XLOC_011177	D1044.6	0	0.13	0.13	5.11e-16	D1044.6.2	j	III:5512926-5603756	-	2	5538363;5539583	5538366;5539592	3;9	TTTCAGCAG;AAGTTCTTCCAGGAG
TCONS_00002577	XLOC_000936:T24B1.1	T24B1.1	0.526	0.655	0.129	0.052757	T24B1.1.1	=	I:7422586-7723116	+	1	7677528	7677536	8	AAGTTTTCTAGACA
TCONS_00051405	XLOC_022419	pezo-1	0.007	0.136	0.129	0.042629	C10C5.1b.1	=	IV:9343357-9376886	-	2	9361965;9363968	9361971;9363974	6;6	AAGTTTCAGGAT;AAGCTACAGCAC
TCONS_00088359	XLOC_040050	pgp-14	0	0.129	0.129	2.97e-05	F22E10.3.1	j	X:12705623-12816045	-	1	12748552	12748557	5	ATTTTCAGCAG
TCONS_00014399	XLOC_005500:F44G4.1	F44G4.1	0.018	0.146	0.128	0.075232	F44G4.1.1	j	II:8951923-8997662	+	1	8993701	8994636	935	CAGGCTTGGACTCCGCAGTACTTTTGTCCAGCATATCGTGGCGACCAATGATTTTCCAGACAAAAATAAACTGGAAGAGTATCAAGTTGAATTAAGAAATCGGATTCTAACAACTGTACAAAAATGTCAACGATCAATATTCATTTTCGATGAGGCTGATAAACTACCAGAGCAGTTGCTAGGCGCAATTAAACCGTTCCTCGACTATTATTCGACAATTTCTGGCGTGGATTTTCGAAGAAGCATCTTCATTCTACTAAGCAATAAAGGTGGAGGAGAAATAGCAAGAATAACAAAAGAACAGTACGAAAGTGGCTATCCACGTGAACAACTCCGCTTGGAAGCTTTCGAACGAGAACTTATGAACTTCTCATACAACGAGAAAGGTGGCTTACAGAT…
TCONS_00072608	XLOC_033246	lact-8	0	0.128	0.128	0.091554	Y42A5A.2c.2	=	V:11087691-11097970	-	1	11092652	11092653	1	ACAGCGC
TCONS_00022882	XLOC_008838:zip-2	zip-2	0	0.126	0.126	4.76e-16	K02F3.4.2	j	III:832976-835808	+	1	833858	834088	230	GTCTTGTCGACCCCCGTCGTCTGTCTCCGACTGGGTGACATCATGTGAAATCTTGCCAAATGTTGTGCAATAGTGGGTGGAGCGTCCGCTCTAACGTGGTTTTTGGGTTTTCTCTGCCTCATTCTTTCGTTTTGACAAATTGTCCATTGGTGACTTTTTGTTTTTTTTTTCTATTTTGCTTACGGGAATCGATTGTTTTGACATGCTTTTGCCTAAACGGTGGTATTTTTCAGCAA
TCONS_00065710	XLOC_030008:sel-10	sel-10	0.044	0.169	0.125	0.079264	F55B12.3b.2	j	V:13818131-13825222	+	1	13819630	13819636	6	CAGTTCCAGACC
TCONS_00066600	XLOC_030452:T10C6.6	T10C6.6	0.039	0.164	0.125	0.059697	T10C6.6c.1	=	V:16017970-16031713	+	1	16024935	16024939	4	ATTTCAGTTA
TCONS_00084572	XLOC_038486	clc-3	0	0.125	0.125	0.046439	ZK563.4b.1	=	X:3368745-3375044	-	2	3374379;3374538	3374381;3374540	2;2	CTTAGACA;TCTAGGTG
TCONS_00006488	XLOC_002491	ubr-4	0.06	0.184	0.124	0.036588	C44E4.1d.1	j	I:4605654-4635620	-	4	4627200;4630038;4630175;4631850	4627206;4630047;4630181;4631859	6;9;6;9	AAGTTCCAGATC;AAGTATTTCCAGACA;AAGTTTCAGATT;AAGTAATTCCAGACG
TCONS_00070601	XLOC_032325	dre-1	0.015	0.138	0.124	0.073919	K04A8.6b.1	j	V:6533613-6546541	-	1	6535019	6535020	1	CCAGACA
TCONS_00049513	XLOC_021549:pqn-22	pqn-22	0	0.123	0.123	2.64e-05	C46G7.4c.1	=	IV:6018002-6033639	-	1	6027524	6027526	2	TCCAGACC
TCONS_00024715	XLOC_009490	hpo-10	0.001	0.123	0.122	1.37e-14	F01F1.1c.1	=	III:5879488-5882923	+	1	5881222	5881231	9	AAGTATTTACAGGAA
TCONS_00014005	XLOC_005337	T05H10.4	0.002	0.124	0.122	8.64e-14	T05H10.4a.2	=	II:8053111-8054965	+	1	8053755	8053761	6	AAGTTTCAGACA
TCONS_00012638	XLOC_004755:shc-2	shc-2	0.001	0.123	0.122	1.35e-06	T27F7.2a.1	=	II:4969167-4993968	+	1	4972854	4972855	1	GCAGAAT
TCONS_00054317	XLOC_023716:col-133	col-133	0	0.122	0.122	0.069663	F52B11.4.1	j	IV:14098285-14101597	-	1	14099354	14099545	191	TAGATAAAATCTACTTTCCTTTGGATTCAAAAAAAAATCGACCTTCAGAGAATCTTTGTCATGTTCATAAAGCAGTGATTTTTTTTTAATTCCCTTTTTTGTTCCTTGTTACAACCGTTCGCGCGTATTACACTCATCAATTTGTGTAGTATAAAAGGATCAGGTTGATTGCAGAAGAACATCATCTTATTTAGAAA
TCONS_00025439	XLOC_009748	lido-18	0	0.121	0.121	0.000104	C18H2.1.1	=	III:7645933-7673132	+	3	7669571;7670482;7671669	7669645;7670587;7671686	74;105;17	CAGCAAAAACAATCCAATCGGTGTTCAAGACGTACAAAGACATTATGCGAAACCGTCTGCATAATGCGATTTTCCAGAAG;CAGCATTCAGGTCACAGAAGATGTCGCCGCAACAATTGCAGAAGTTGAGAACGACGTGACTCAGATTGGCCGCAATCACCCGGATCTCAGATAAATCGAACCACGCAGGCG;CAGAACAACATAATGTGCAGGAG
TCONS_00065424	XLOC_029887	fmi-1	0.037	0.158	0.121	0.061205	F15B9.7a.1	j	V:13018660-13033373	+	1	13024243	13024245	2	CAGGCAGA
TCONS_00019112	XLOC_007381	tat-4	0.001	0.122	0.121	1.18e-22	T24H7.5c.2	=	II:6234482-6244287	-	1	6235505	6235507	2	TCCAGGCA
TCONS_00017536	XLOC_006721:K09F6.6	K09F6.6	0.015	0.135	0.12	0.088832	K09F6.6.1	j	II:2254751-2308361	-	5	2276281;2277471;2279155;2291299;2291591	2276282;2277472;2288061;2291300;2291601	1;1;8906;1;10	TCAGATC;TCAGGAC;CAGAAATGTCTGGATCACCGAAAAGGAAAACAACTACAACTTGCAAAGAGTTTGGCAACATCTGTTGGGCTGGATTGCGACCGCGAAGAACATGGATTCGATGATTTACAGAAAATTGCAGACCATCTGCATAACATTTGTGTGTGGGGGCTGAAAAGCGGTTCAAAGGCTACGGCGAAAATTTTTGAAGCAAATAAAGGTGCAAAAGGATTCATTCCACTTCTGTATGTCGACAACCACTTTGATTTTTTTGTACCGAGGATTGATTACGTCAATACCGGATTTTGTTTCAAATGTAATCAATACTCTGGTCGCCGACATTACCAAACATGCGGGGCCAAATGTCGGAGATGTGGTGTCACCAATTGCGAGAAGAATGGAGT…
TCONS_00064547	XLOC_029455	math-33	0.05	0.17	0.119	0.054645	H19N07.2a.1	=	V:11113410-11119730	+	2	11114301;11117886	11114310;11117892	9;6	AAGAGGTTCCAGAAA;AAGCTTCAGCTC
TCONS_00031468	XLOC_011866	alg-4	0	0.119	0.119	0.02638	ZK757.3b.1	=	III:9887197-9891510	-	2	9890570;9890780	9890571;9890789	1;9	TCAGGAG;CAGGGATCTCAGGAT
TCONS_00012901	XLOC_004871:C17C3.1	C17C3.1	0.131	0.249	0.118	0.043621	C17C3.1b.1	j	II:5543580-5657371	+	1	5572638	5572701	63	CTCATTATTGACATCACAATTAATTTCCAATGATTTTTTGAAGTAGTTTTCAAAATCAATTTCCAGAAT
TCONS_00017537	XLOC_006721:K09F6.6	K09F6.6	0.002	0.12	0.118	1.14e-11	K09F6.6.1	j	II:2254751-2308361	-	4	2276281;2277471;2291299;2291591	2276282;2277472;2291300;2291601	1;1;1;10	TCAGATC;TCAGGAC;TCAGATA;TAGTTATTTGAAGGAA
TCONS_00075695	XLOC_034676	R10E8.1	0.028	0.146	0.118	0.049721	R10E8.1a.1	j	V:18242068-18252416	-	3	18243774;18249449;18252318	18243947;18250550;18252325	173;1101;7	GCCGTTTTAGGCTGAGAAAAAAGTAACTTGCTTCGAATTTAATGCGGTCATATTTTTGAATAAAGCGAAGCTCACATCAGCTGGCAATAGTTTTCAACAATATACGTTTACTTTATTCGTGTTGGAAACGTTATCAATGATACACAATGTATTGAAAACTGATTAAAAAATTTCAGAAC;TAGGAGGTGAGGGACAACACAAATAGTGGTGATTAGACGGCGCGACATTCTTTCCCAACGTGTGGTACTCTATCAATATTGCTAACTGTTATGTGTATCTACGAATGTACAGTATAGTCTGTATTAGTTTGCTTATCGTCACTACAATCATCAACACAGCTCGCAGCCTACAGTACGTGCAACTTCTATAGCGCCTCCTACTTTTTATGAGTTTTACTG…
TCONS_00020723	XLOC_008009:cyp-13A1	cyp-13A1	0.001	0.117	0.117	0.06064	T10B9.8.1	j	II:9770758-9782495	-	2	9775590;9781217	9775591;9781218	1;1	TCAGTGG;TCAGAAA
TCONS_00086456	XLOC_039262	adm-4	0.536	0.653	0.117	0.002567	ZK154.7.1	=	X:7795045-7798325	-	1	7797624	7797625	1	TCAGGTC
TCONS_00079875	XLOC_036530:rig-1	rig-1	0.023	0.138	0.116	0.082394	K09E2.4a.1	j	X:8647974-8681738	+	1	8661276	8661278	2	TTCAGAGG
TCONS_00051755	XLOC_022564	C47E12.2	0.73	0.846	0.116	0.098216	C47E12.2.1	=	IV:10001971-10003534	-	1	10003346	10003348	2	TCCAGGAA
TCONS_00011141	XLOC_004157	jip-1	0.009	0.124	0.115	1.01e-05	F56D12.4a.1	j	II:1326580-1350385	+	1	1329414	1329424	10	CAGGTACTCCCCGAGC
TCONS_00008424	XLOC_003194:marc-3	marc-3	0.032	0.146	0.114	0.048841	C17E4.3.1	j	I:9416703-9422321	-	1	9418882	9418884	2	TTCAGGTC
TCONS_00009585	XLOC_003681	E03H4.8	0.1	0.214	0.114	0.089435	E03H4.8.1	j	I:12418905-12429377	-	1	12425930	12425936	6	AATTTTTAGATG
TCONS_00050681	XLOC_022127:pam-1	pam-1	0.115	0.229	0.114	0.007257	F49E8.3b.1	=	IV:7543983-7551511	-	1	7547117	7547425	308	CAGGTTGTTGTGGGAACTGCATCTAACAATAAAATTCTCATCACCTCAACTCGCGCTCTTCTTCCATTTGCTTTCACTCCTGAATCGCTCGACACTTTTGAGCAAGAAAAAGCATCAGAAGCTAAAGGATTAAAGCAAGATGATGCCACGGAGCATAACGTTACAGTCGTCTCTTAATTTTTTATTCCAATCAGAAACTCCTTTCCACATTTCCCGCCATTCCTAGTAGTGTTTTTTTTCATTTGTGATATCCTTCTCTTTCTTTCAATTTAGTTGTGTCAAAAATTCATTTTATTAATAAAACTTTTCAGAAT
TCONS_00070362	XLOC_032216	pcm-1	0.057	0.17	0.113	0.047756	C10F3.5a.1	j	V:5960584-5969175	-	1	5963832	5963882	50	CTAATACGCTGCGTCTCTTCTCCATAACGTCTGAGAGAACATCGATTGTACAGATA
TCONS_00010353	XLOC_003918	ttm-5	0.735	0.848	0.113	0.00951	Y54E5A.1.1	j	I:14634140-14737061	-	1	14691734	14691736	2	TTCAGATC
TCONS_00036884	XLOC_014458	C49H3.6	0.048	0.159	0.111	0.073029	C49H3.6b.1	=	IV:7882027-7907083	+	2	7904432;7904586	7904439;7904599	7;13	AAGTTTTCAGCTG;TAGAACAAATCTTTAGGTA
TCONS_00014877	XLOC_005689:F54B3.1	F54B3.1	0.004	0.115	0.111	0.030593	F54B3.1b.1	=	II:10236881-10270152	+	3	10262876;10263064;10266647	10262882;10263079;10266653	6;15;6	TAGCTTCAGCAC;CAGATCAAAACGTTTCAGCCT;TAGTTACAGGAC
TCONS_00031298	XLOC_011807:acox-1.5	acox-1.5	0.028	0.139	0.111	7.05e-06	C48B4.1.1	j	III:9568750-9595810	-	1	9587171	9587172	1	TCAGGCT
TCONS_00025352	XLOC_009725	C07H6.4	0.815	0.923	0.108	0.038122	C07H6.4.1	=	III:7499676-7503283	+	1	7499852	7499857	5	AAGTTTAGACA
TCONS_00015496	XLOC_005988:ash-2	ash-2	0	0.108	0.108	4.09e-11	Y17G7B.2a.1	=	II:11977783-11992823	+	2	11980766;11983001	11980772;11983010	6;9	AAGTTCCAGAAA;AAGAACTTCCAGAGC
TCONS_00020409	XLOC_007874	T24B8.7	0.056	0.163	0.108	0.02784	T24B8.7c.2	=	II:9041522-9053824	-	3	9047822;9048421;9049811	9047831;9048428;9049817	9;7;6	AAGACTTTTCAGTTC;CAGTTTTTAGGGT;TAGCTTCAGAAG
TCONS_00029592	XLOC_011160	Y32H12A.7	0.718	0.825	0.107	0.026852	Y32H12A.7.2	=	III:5282444-5467992	-	2	5383595;5385051	5383601;5385085	6;34	CAGTTTCAGCTA;CGAAGAAAAAAATCCCATAAAATATCAAGATTTTTAGAAA
TCONS_00002751	XLOC_001002	spr-4	0.005	0.111	0.106	0.033802	C09H6.1a.1	j	I:8099243-8109376	+	1	8108727	8108733	6	TAGTTTCAGACT
TCONS_00026996	XLOC_010326:crh-1	crh-1	0.02	0.127	0.106	0.001131	Y41C4A.4a.1	j	III:11657397-11698306	+	1	11691293	11691302	9	TAGTATTTCCAGGAG
TCONS_00021229	XLOC_008200:nbs-1	nbs-1	0.085	0.191	0.106	0.025901	C09H10.10b.1	=	II:11095047-11096475	-	1	11095497	11095506	9	CAGTTTTTTCAGACC
TCONS_00027491	XLOC_010498	F11F1.1	0.034	0.138	0.105	0.002351	F11F1.1b.1	j	III:13395102-13400563	+	1	13398899	13399266	367	AGAATGTATTCATCCAAAGTTGCTTTCACACTTGTTGTTTCAATTGCAATTGTAACAGCAGTTCCTCTCGGAGGGATACTCGGAAGAAATGGACAAGGAGGTCTCGGAGGAATCCTTGGTGGAGGTGAAGGTGGTTTAGGAGGAATACTCGGAAATGGTGGATTAGGTGGAATCCTCGGAGGAAATGGATTGGGAGGAGTACTTGGAGGAGAGGATGGTGGATTGGGAGGAATCATTGGTCAACTTCTTGGAAGTGCAAATGCAACAGATGGACTTTTGGGAATTATAAATCCAGCAGATTTATTGGATTTGTCTCTTCTTGGAGATGGCCTCACTCAAAAAATTATTGATCTTGTTGAAAAGATTCCAGGAA
TCONS_00002608	XLOC_000946	F27D4.6	0.036	0.141	0.104	0.002519	F27D4.6a.3	=	I:7730858-7737995	+	1	7734650	7734660	10	TAGATGTTTCAAGAGC
TCONS_00066834	XLOC_030583	Y32B12B.4	0.031	0.135	0.104	0.000155	Y32B12B.4a.1	j	V:16553114-16563558	+	1	16553327	16553329	2	TTCAGCGC
TCONS_00019471	XLOC_007539:lst-6	lst-6	0	0.104	0.104	8.72e-05	C52E12.4.1	=	II:7010772-7033031	-	2	7014305;7018808	7014306;7018814	1;6	TCAGATT;AAGCTTTAGGTA
TCONS_00090021	XLOC_040738	lido-6	0.005	0.109	0.104	0.000411	K09E3.6.1	j	X:17112827-17131011	-	2	17114204;17115189	17114205;17115195	1;6	TCAGGCA;TTTTTTCAGCAT
TCONS_00003622	XLOC_001400	ubc-25	0.892	0.995	0.103	0.000109	F25H2.8.2	j	I:10562830-10564914	+	1	10562968	10562970	2	TTCAGGTA
TCONS_00086293	XLOC_039207	F48E3.8	0	0.104	0.103	9.81e-05	F48E3.8a.1	j	X:7507708-7521021	-	11	7509171;7509305;7513020;7513187;7514734;7515184;7515390;7515983;7516551;7516782;7517176	7509172;7509553;7513021;7513189;7514735;7515185;7515391;7515984;7516553;7516783;7517181	1;248;1;2;1;1;1;1;2;1;5	TCAGCAC;CAGAGAAATGTGGAAGTTATAAAGATTGTGGGAAATCGCAAACCTGTTCAAGCGATCGACTTTGTGAATGCACTTTTAATACTAACCTGGTTAACGGAGAATGCGTCTAAAGACTTGCCTAATCGATTGCGTTTTAATATTTTTCGATATTTTTGTATATTTTGCATGAAAACAAAACTAACTTAATAAGCTTAATAAATAATACTAACATTTTTCACACATGACTTTAACAAGCAAATATGTTTTTCAAGAAC;CCAGCTG;TTAAGCAA;CTAGTAA;TCAGCTG;TTAGATC;TCAGTTC;TTAAGGAT;TCAGAGA;ATTTTCAGATG
TCONS_00021115	XLOC_008152	npp-19	0.102	0.205	0.103	0.038995	R06F6.5a.1	=	II:10796645-10798479	-	1	10796965	10796974	9	AAGATTTTACAGGGA
TCONS_00020348	XLOC_007854:sftd-3	sftd-3	0.013	0.114	0.101	0.010893	C18E9.10d.1	=	II:8951923-8997662	-	1	8963981	8963987	6	AAGTTTCAGAGG
TCONS_00010021	XLOC_003823	Y6B3B.9	0.001	0.102	0.101	3.41e-07	Y6B3B.9a.1	j	I:13734957-13751138	-	2	13743722;13750562	13743723;13750565	1;3	CCAGATT;TTTCAGAAC
TCONS_00013061	XLOC_004938:cgt-3	cgt-3	0.989	0.888	-0.101	0.054963	F59G1.1b.1	=	II:5911323-5916910	+	1	5912511	5912557	46	GTTTTACCATAAATTAATAGACGAGAAATTAATAAATATTCATTGTCAGAAC
TCONS_00029825	XLOC_011234	dpff-1	0.137	0.036	-0.101	0.065502	C28H8.9a.1	j	III:5903551-5917585	-	1	5906118	5906343	225	TAGGCCGGAAACGAAGAAGAAAACTCGAGCCAAAAGGTCCATCAGCCAACGAGTCCACGCTGGACAATACGCAATTTCGCGTGTTGGTGTTTGCGTACATCGGCAGCTGTCCAATTTATCGATCAGTGTTCATTCATTCTCTTGTTTTTTTTGTTTGTTCACACCGGGCGCCCGATTTCTTGAGCTATCAAAATGTTTAAAAATAATCCAAGACAGCTAATCTTACAGACA
TCONS_00022849	XLOC_008828	ptl-1	0.102	0	-0.102	0.021981	F42G9.9b.2	=	III:763809-771366	+	1	768557	768558	1	TTAGGAA
TCONS_00025033	XLOC_009605	rbf-1	0.106	0.003	-0.103	0.008072	F37A4.7c.1	=	III:6669380-6703984	+	1	6699242	6699244	2	TTTAGGTC
TCONS_00086738	XLOC_039368	wrk-1	0.119	0.016	-0.103	0.072725	F41D9.3a.1	=	X:8387447-8402099	-	3	8391100;8391333;8392223	8391106;8391357;8392224	6;24;1	TAGTTTAAGGCT;CAGTTTTCAAACCCACTCAAGTTTCAGTTA;TCAGACA
TCONS_00017034	XLOC_006551:Y57G7A.6	Y57G7A.6	0.135	0.03	-0.105	0.068168	Y57G7A.6.1	j	II:1273101-1287988	-	1	1282106	1282107	1	TTAGGTG
TCONS_00063859	XLOC_029149	eif-2Bdelta	0.833	0.727	-0.106	0.090923	F11A3.2a.1	j	V:9513823-9518933	+	1	9514177	9514180	3	CAGGAAACT
TCONS_00076156	XLOC_034853:C25F9.5	C25F9.5	0.139	0.033	-0.106	0.03107	C25F9.5.1	j	V:19407628-19427056	-	1	19410613	19410615	2	TACAGAAC
TCONS_00008195	XLOC_003131:rbpl-1	rbpl-1	0.186	0.079	-0.107	0.000424	F36F2.3a.1	j	I:9004496-9057999	-	1	9009937	9009946	9	TAGAAATTGCAGGCC
TCONS_00031300	XLOC_011807:acox-1.5	acox-1.5	0.937	0.83	-0.108	0.003746	C48B4.1.1	=	III:9568750-9595810	-	1	9587171	9587172	1	TCAGGCT
[truncated: 297 more rows]
