# Supplementary material for: Systematic transcriptome analysis associated with physiological and chronological aging inCaenorhabditis elegans
Source: HighWire-hosted journal article supplement (doi:10.1101/gr.276515.121), 2022-11-01
Supplement: Supplemental_Table_S4.docx [file Supplemental_Table_S4.docx]

**Supplemental Tables**

**Supplemental Table S4. List of RT-PCR primers used in this study.**

| **Primer** | **Sequence (5′ to 3′)** |
| --- | --- |
| *gale-1* forward | TTTCGCCAACGCAATTTCCG |
| *gale-1* reverse | GAACATCTTTTCCAGTCAAC |
| *unc-61* forward | GATTATTGAAAAACTCGCACAG |
| *unc-61* reverse | AAGAGTAAGCTCACGACGGC |
| *let-49* forward | CGTATACAAGTGATCGAATC |
| *let-49* reverse | ATCTTCCAATCGATATTCCTC |
